# Supplementary material for: Somatic mutational landscape reveals mutational signatures and significantly mutated genes of cancer immunotherapeutic outcome and sex disparities
Source: Front Immunol. 2024 Nov 1;15:1423796. doi: 10.3389/fimmu.2024.1423796 (PMC11563811; doi:10.3389/fimmu.2024.1423796)
Supplement: Supplementary file 1 [file DataSheet1.xlsx]

## Sheet: Table S1
Table S1 Detailed clinicopathologic data and immunotherapy information of included 2348 cancer patients
Sample ID	OS (months)	OS status	Age	Sex	Disease status	Cancer type	Drug target	TMB
P-0021365-T01-IM6	5.52632	0	7.9	Female	Primary	SKCM	PD-1/PD-L1	0
P-0003319-T01-IM5	4	1	15	Male	Primary	BG	PD-1/PD-L1	0.98
P-0005963-T01-IM5	3	1	15	Male	Primary	BG	PD-1/PD-L1	2.95
P-0035595-T01-IM6	60	0	15.2	Female	Metastasis	SKCM	PD-1/PD-L1	1.7294
P-0010005-T01-IM5	41.5132	0	15.3	Male	Primary	SKCM	PD-1/PD-L1	4.8936
P-0000958-T01-IM3	35	0	16	Female	Primary	SKCM	CTLA-4	2.23
P-0006746-T01-IM5	7	1	16	Female	Metastasis	RCC	PD-1/PD-L1	0
P-0001591-T01-IM3	15	1	17	Male	Primary	BG	PD-1/PD-L1	2.23
P-0004126-T01-IM5	14	0	17	Female	Metastasis	HNSC	PD-1/PD-L1	0
P-0017285-T01-IM6	7	0	17	Female	Primary	Unknown	PD-1/PD-L1	0.877715
P-0007010-T01-IM5	5	1	17	Male	Primary	BG	PD-1/PD-L1	0.98
P-0022308-T01-IM6	10.3618	0	18	Male	Metastasis	SKCM	PD-1/PD-L1	6.91758
P-0002620-T01-IM3	11	1	19	Male	Primary	BG	PD-1/PD-L1	6.69
P-0002653-T01-IM3	3	1	19	Female	Primary	CRC	PD-1/PD-L1	2.23049
P-0024994-T01-IM6	60	0	19.2	Female	Metastasis	SKCM	PD-1/PD-L1	4.32349
P-0039415-T01-IM6	60	0	19.7	Male	Metastasis	SKCM	PD-1/PD-L1	26.8056
P-0010805-T01-IM5	25.4605	1	19.7	Male	Metastasis	SKCM	PD-1/PD-L1	18.5957
P-0019066-T01-IM6	45.2632	0	20	Male	Metastasis	SKCM	PD-1/PD-L1	1.7294
P-0015007-T01-IM6	19	0	20	Male	Metastasis	SKCM	PD-1/PD-L1	7.02
P-0012905-T01-IM5	16	0	20	Male	Metastasis	Unknown	Combination	1.96758
P-0024753-T01-IM6	3	0	21	Female	Metastasis	Unknown	PD-1/PD-L1	0.877715
P-0006428-T01-IM5	2	1	21	Female	Primary	BG	PD-1/PD-L1	7.87
P-0000350-T01-IM3	26	1	22	Female	Metastasis	RCC	Combination	0
P-0002912-T01-IM3	4.33	1	22	Male	Metastasis	NSCLC	Combination	2.21831
P-0022543-T01-IM6	3	0	22	Male	Metastasis	Unknown	PD-1/PD-L1	4.38857
P-0012924-T01-IM5	3.19079	0	22.2	Female	Metastasis	SKCM	PD-1/PD-L1	0.97872
P-0039162-T01-IM6	2.00658	0	22.5	Male	Metastasis	SKCM	PD-1/PD-L1	2.59409
P-0004914-T01-IM5	60	0	22.7	Female	Metastasis	SKCM	PD-1/PD-L1	23.4893
P-0004203-T01-IM5	32	0	23	Male	Metastasis	SKCM	Combination	9.84
P-0015289-T01-IM6	16	0	23	Male	Primary	BG	PD-1/PD-L1	2.63
P-0012869-T01-IM5	14	1	23	Female	Metastasis	SKCM	PD-1/PD-L1	5.9
P-0001260-T01-IM3	1	1	23	Female	Metastasis	EGC	PD-1/PD-L1	3.34573
P-0027227-T01-IM6	60	0	23.1	Female	Primary	SKCM	PD-1/PD-L1	10.3764
P-0009830-T01-IM5	30	0	25	Male	Metastasis	CRC	PD-1/PD-L1	44.2705
P-0004329-T01-IM5	15	0	25	Male	Metastasis	Unknown	Combination	2.95137
P-0005971-T01-IM5	13	1	25	Female	Metastasis	SKCM	Combination	3.94
P-0016048-T01-IM6	12	1	25	Female	Primary	BG	PD-1/PD-L1	4.39
P-0005157-T01-IM5	7	1	25	Male	Metastasis	SKCM	Combination	3.94
P-0006545-T01-IM5	4	1	25	Male	Primary	BG	PD-1/PD-L1	4.92
P-0005583-T01-IM5	1	1	25	Female	Metastasis	SKCM	Combination	6.89
P-0012720-T01-IM5	1	1	25	Male	Primary	EGC	Combination	2.95137
P-0015498-T01-IM6	44.7697	0	25.8	Male	Metastasis	SKCM	PD-1/PD-L1	15.5646
P-0001731-T01-IM3	31	1	26	Male	Primary	BG	PD-1/PD-L1	5.58
P-0018464-T01-IM6	22	0	26	Male	Metastasis	EGC	PD-1/PD-L1	6.144
P-0011144-T01-IM5	4	1	26	Female	Primary	CRC	PD-1/PD-L1	4.91895
P-0025608-T01-IM6	8.61842	1	26.4	Male	Metastasis	SKCM	PD-1/PD-L1	5.18819
P-0040090-T01-IM6	60	0	26.8	Female	Metastasis	SKCM	PD-1/PD-L1	13.8352
P-0005493-T01-IM5	31	0	27	Male	Metastasis	SKCM	Combination	7.87
P-0017361-T01-IM6	27.5658	0	27	Male	Metastasis	SKCM	PD-1/PD-L1	19.0234
P-0018277-T01-IM6	1	0	27	Male	Metastasis	CRC	Combination	8.77715
P-0003199-T01-IM5	25	1	27.1	Male	Primary	SKCM	PD-1/PD-L1	1.95744
P-0022986-T01-IM6	60	0	27.7	Female	Metastasis	SKCM	PD-1/PD-L1	11.2411
P-0005461-T02-IM5	12.8947	0	27.8	Male	Metastasis	SKCM	PD-1/PD-L1	3.91488
P-0008492-T02-IM5	14	1	28	Male	Metastasis	SKCM	Combination	2.95
P-0000749-T01-IM3	13	0	28	Male	Primary	BG	PD-1/PD-L1	8.92
P-0019949-T01-IM6	8	0	28	Male	Metastasis	CRC	PD-1/PD-L1	38.6195
P-0014118-T01-IM5	2	1	28	Male	Metastasis	EGC	Combination	0
P-0008912-T01-IM5	1	1	28	Female	Metastasis	SKCM	Combination	15.74
P-0024771-T01-IM6	60	0	28.2	Female	Metastasis	SKCM	PD-1/PD-L1	5.18819
P-0033779-T01-IM6	32.5987	0	28.3	Female	Metastasis	SKCM	PD-1/PD-L1	3.45879
P-0003966-T01-IM5	46.1842	1	28.4	Male	Metastasis	SKCM	PD-1/PD-L1	5.87232
P-0030816-T01-IM6	13.2895	0	28.8	Female	Primary	SKCM	PD-1/PD-L1	6.91758
P-0006546-T01-IM5	32	0	29	Male	Primary	BG	PD-1/PD-L1	6.89
P-0019226-T01-IM6	9	0	29	Male	Metastasis	HNSC	PD-1/PD-L1	4.38857
P-0003272-T01-IM5	8	1	29	Male	Metastasis	HNSC	PD-1/PD-L1	0.983789
P-0000223-T01-IM3	2	1	29	Female	Primary	BG	PD-1/PD-L1	5.58
P-0003010-T01-IM3	60	0	29.5	Female	Metastasis	SKCM	PD-1/PD-L1	4.43662
P-0002418-T01-IM3	31	0	30	Female	Metastasis	SKCM	CTLA-4	3.35
P-0007238-T01-IM5	28	0	30	Male	Metastasis	SKCM	PD-1/PD-L1	2.95
P-0014666-T01-IM6	17	0	30	Female	Metastasis	SKCM	PD-1/PD-L1	0
P-0037116-T01-IM6	4.83553	0	30.2	Male	Primary	SKCM	PD-1/PD-L1	6.05289
P-0009697-T01-IM5	1.74342	0	30.9	Male	Metastasis	SKCM	PD-1/PD-L1	2.93616
P-0007388-T01-IM5	15	1	31	Female	Primary	HNSC	PD-1/PD-L1	11.8055
P-0008904-T01-IM5	11	1	31	Female	Metastasis	SKCM	Combination	1.97
P-0001955-T01-IM3	6	1	31	Female	Metastasis	NSCLC	PD-1/PD-L1	2.23
P-0005176-T01-IM5	5	1	31	Female	Metastasis	BRCA	CTLA-4	1.97
P-0036089-T01-IM6	60	0	31.3	Male	Metastasis	SKCM	PD-1/PD-L1	7.78228
P-0032937-T01-IM6	60	0	31.4	Female	Metastasis	SKCM	PD-1/PD-L1	6.05289
P-0020768-T01-IM6	52.0066	0	31.8	Male	Metastasis	SKCM	PD-1/PD-L1	2.59409
P-0032079-T01-IM6	17.1053	0	31.8	Male	Metastasis	SKCM	PD-1/PD-L1	17.294
P-0003555-T01-IM5	33	0	32	Male	Primary	BLCA	PD-1/PD-L1	71.8166
P-0007349-T01-IM5	14	1	32	Female	Primary	BRCA	CTLA-4	4.92
P-0019271-T01-IM6	9	0	32	Male	Primary	EGC	Combination	7.89943
P-0027031-T01-IM6	5	0	32	Female	Metastasis	EGC	PD-1/PD-L1	2.63314
P-0009469-T01-IM5	3	0	32	Female	Primary	NSCLC	PD-1/PD-L1	2.95
P-0002738-T01-IM3	1	1	32	Female	Metastasis	NSCLC	PD-1/PD-L1	7.81
P-0002832-T01-IM3	60	0	32.1	Male	Metastasis	SKCM	PD-1/PD-L1	2.21831
P-0017272-T01-IM6	46.7434	0	32.3	Female	Metastasis	SKCM	PD-1/PD-L1	8.64698
P-0017353-T01-IM6	35.6579	1	32.8	Female	Primary	SKCM	PD-1/PD-L1	5.18819
P-0023378-T01-IM6	60	0	32.9	Female	Metastasis	SKCM	PD-1/PD-L1	17.294
P-0036578-T01-IM6	8.75	0	32.9	Male	Primary	SKCM	PD-1/PD-L1	2.59409
P-0007736-T01-IM5	60	0	33	Female	Metastasis	SKCM	CTLA-4	11.81
P-0002049-T01-IM3	39	0	33	Female	Primary	CRC	PD-1/PD-L1	54.6469
P-0004661-T01-IM5	32	0	33	Male	Metastasis	SKCM	Combination	7.87
P-0005604-T01-IM5	30	0	33	Male	Metastasis	SKCM	Combination	5.9
P-0002270-T01-IM3	16	0	33	Male	Metastasis	RCC	PD-1/PD-L1	4.46
P-0015511-T01-IM6	15	0	33	Male	Metastasis	SKCM	Combination	13.17
P-0000818-T01-IM3	14	1	33	Male	Primary	BG	PD-1/PD-L1	5.58
P-0002386-T01-IM3	12	1	33	Female	Primary	BG	PD-1/PD-L1	5.58
P-0015713-T01-IM6	9	0	33	Female	Metastasis	BRCA	PD-1/PD-L1	0.88
P-0004256-T01-IM5	7	1	33	Male	Primary	BG	PD-1/PD-L1	3.94
P-0016775-T01-IM6	5	0	33	Female	Metastasis	Unknown	Combination	1.75543
P-0017986-T01-IM6	2	0	33	Female	Primary	CRC	PD-1/PD-L1	61.44
P-0039410-T01-IM6	60	0	33.3	Female	Metastasis	SKCM	PD-1/PD-L1	9.51168
P-0038390-T01-IM6	27.6645	0	33.6	Female	Metastasis	SKCM	PD-1/PD-L1	0
P-0008328-T01-IM5	25	1	34	Female	Metastasis	HNSC	PD-1/PD-L1	10.8217
P-0040076-T01-IM6	22.2697	0	34	Male	Primary	SKCM	PD-1/PD-L1	9.51168
P-0015373-T01-IM6	17	0	34	Male	Primary	SKCM	Combination	30.72
P-0005634-T01-IM5	4	1	34	Male	Metastasis	CRC	CTLA-4	8.8541
P-0006708-T01-IM5	4	1	34	Female	Metastasis	CRC	PD-1/PD-L1	9.83789
P-0001400-T01-IM3	3	1	34	Female	Primary	BG	PD-1/PD-L1	5.58
P-0010104-T01-IM5	3	1	34	Male	Primary	HNSC	PD-1/PD-L1	4.91895
P-0006743-T01-IM5	2	0	34	Female	Metastasis	CRC	PD-1/PD-L1	5.90273
P-0014465-T01-IM6	2	0	34	Male	Metastasis	HNSC	PD-1/PD-L1	8.77715
P-0014208-T01-IM6	60	0	34.5	Female	Metastasis	SKCM	PD-1/PD-L1	19.0234
P-0022146-T01-IM6	19.9342	1	34.7	Male	Metastasis	SKCM	PD-1/PD-L1	11.2411
P-0016800-T01-IM6	60	0	34.8	Male	Metastasis	SKCM	PD-1/PD-L1	5.18819
P-0004857-T01-IM5	33	0	35	Male	Primary	BG	PD-1/PD-L1	4.92
P-0006192-T01-IM5	30	0	35	Female	Metastasis	SKCM	Combination	7.87
P-0003406-T01-IM5	13	1	35	Male	Metastasis	RCC	PD-1/PD-L1	2.95
P-0010111-T01-IM5	13	0	35	Female	Primary	SKCM	CTLA-4	2.95
P-0002939-T01-IM3	10	1	35	Male	Primary	HNSC	PD-1/PD-L1	1.11524
P-0009588-T01-IM5	8	1	35	Male	Metastasis	HNSC	PD-1/PD-L1	2.95137
P-0023790-T01-IM6	4	0	35	Female	Metastasis	Unknown	PD-1/PD-L1	4.38857
P-0000638-T01-IM3	1	1	35	Female	Metastasis	BRCA	CTLA-4	0
P-0016340-T01-IM6	1	1	35	Female	Metastasis	Unknown	PD-1/PD-L1	1.75543
P-0009855-T01-IM5	39.7039	1	35.2	Female	Metastasis	SKCM	PD-1/PD-L1	2.93616
P-0035069-T01-IM6	8.05921	1	35.4	Male	Primary	SKCM	PD-1/PD-L1	0.864698
P-0032845-T01-IM6	11.2171	0	35.5	Female	Primary	SKCM	PD-1/PD-L1	17.294
P-0019889-T02-IM6	3.45395	0	35.6	Female	Metastasis	SKCM	PD-1/PD-L1	16.4293
P-0031794-T01-IM6	23.9145	0	35.9	Male	Metastasis	SKCM	PD-1/PD-L1	2.59409
P-0003742-T01-IM5	18	1	36	Female	Metastasis	SKCM	CTLA-4	5.9
P-0000447-T01-IM3	12	1	36	Female	Primary	BRCA	Combination	3.35
P-0004077-T01-IM5	7	1	36	Female	Metastasis	RCC	Combination	1.97
P-0009499-T01-IM5	5	1	36	Male	Primary	BG	PD-1/PD-L1	51.16
P-0002018-T01-IM3	4	1	36	Female	Metastasis	SKCM	Combination	6.69
P-0017159-T01-IM6	4	0	36	Female	Metastasis	Unknown	PD-1/PD-L1	35.1086
P-0014010-T01-IM5	3	1	36	Female	Metastasis	CRC	PD-1/PD-L1	6.88652
P-0017539-T01-IM5	60	0	36.5	Male	Metastasis	SKCM	PD-1/PD-L1	5.87232
P-0005151-T01-IM5	30	0	37	Male	Primary	CRC	PD-1/PD-L1	65.9139
P-0013096-T01-IM5	19	0	37	Male	Primary	CRC	PD-1/PD-L1	2.95137
P-0012825-T02-IM6	14	0	37	Female	Metastasis	BRCA	PD-1/PD-L1	0.88
P-0007757-T02-IM5	6.33	1	37	Female	Metastasis	NSCLC	Combination	8.80848
P-0003285-T01-IM5	3	0	37	Female	Metastasis	CRC	PD-1/PD-L1	4.91895
P-0007895-T01-IM5	1	1	37	Male	Primary	EGC	Combination	3.93516
P-0039179-T01-IM6	28.6184	0	37.3	Female	Metastasis	SKCM	PD-1/PD-L1	122.787
P-0033097-T01-IM6	60	0	38	Male	Metastasis	SKCM	PD-1/PD-L1	13.8352
P-0004362-T01-IM5	34	1	38	Male	Primary	CRC	PD-1/PD-L1	68.8652
P-0007410-T01-IM5	29	0	38	Male	Metastasis	CRC	PD-1/PD-L1	1.96758
P-0007531-T01-IM5	27	1	38	Female	Primary	EGC	PD-1/PD-L1	9.83789
P-0021797-T01-IM6	18.3	1	38	Male	Metastasis	NSCLC	PD-1/PD-L1	3.5
P-0004271-T01-IM5	7.1	0	38	Female	Metastasis	NSCLC	PD-1/PD-L1	3
P-0015904-T01-IM6	6	0	38	Male	Metastasis	EGC	Combination	11.4103
P-0011195-T01-IM5	5	1	38	Female	Metastasis	CRC	PD-1/PD-L1	2.95137
P-0018102-T01-IM6	2.66447	0	38	Female	Metastasis	SKCM	PD-1/PD-L1	1.7294
P-0036794-T01-IM6	37.5658	0	38.9	Female	Metastasis	SKCM	PD-1/PD-L1	10.3764
P-0002559-T01-IM3	43	0	39	Female	Primary	NSCLC	PD-1/PD-L1	1.12
P-0004706-T01-IM5	13	1	39	Male	Metastasis	SKCM	Combination	3.94
P-0009263-T01-IM5	12	1	39	Male	Primary	BLCA	Combination	24.5947
P-0012133-T01-IM5	12	1	39	Male	Metastasis	CRC	Combination	3.93516
P-0012281-T01-IM5	10	0	39	Male	Metastasis	CRC	PD-1/PD-L1	2.95137
P-0017769-T01-IM6	9	1	39	Male	Primary	HNSC	PD-1/PD-L1	6.144
P-0003273-T01-IM5	6	1	39	Female	Metastasis	BRCA	CTLA-4	0.98
P-0011297-T02-IM5	60	0	39.2	Male	Metastasis	SKCM	PD-1/PD-L1	3.91488
P-0007291-T01-IM5	26.1842	1	39.2	Male	Metastasis	SKCM	PD-1/PD-L1	9.7872
P-0026158-T01-IM6	18.75	0	39.2	Male	Metastasis	SKCM	PD-1/PD-L1	1.7294
P-0029808-T01-IM6	11.5132	0	39.2	Male	Primary	SKCM	PD-1/PD-L1	6.91758
P-0024121-T01-IM6	60	0	39.3	Male	Metastasis	SKCM	PD-1/PD-L1	42.3702
P-0009589-T01-IM5	60	0	39.3	Male	Metastasis	SKCM	PD-1/PD-L1	3.91488
P-0004236-T01-IM5	26.2829	1	39.3	Female	Metastasis	SKCM	PD-1/PD-L1	15.6595
P-0013341-T01-IM5	60	0	39.5	Male	Metastasis	SKCM	PD-1/PD-L1	17.617
P-0007492-T01-IM5	60	0	39.6	Female	Metastasis	SKCM	PD-1/PD-L1	4.8936
P-0036240-T01-IM6	60	0	39.7	Female	Metastasis	SKCM	PD-1/PD-L1	13.8352
P-0009297-T01-IM5	14	1	40	Female	Metastasis	BRCA	PD-1/PD-L1	7.87
P-0001531-T01-IM3	12	0	40	Male	Primary	CRC	PD-1/PD-L1	4.46097
P-0003059-T01-IM5	10	1	40	Female	Primary	HNSC	PD-1/PD-L1	2.95137
P-0010644-T01-IM5	10	1	40	Male	Metastasis	SKCM	PD-1/PD-L1	0.98
P-0010065-T01-IM5	9	0	40	Male	Metastasis	NSCLC	PD-1/PD-L1	1.97
P-0004495-T01-IM5	8	1	40	Male	Primary	NSCLC	PD-1/PD-L1	8.85
P-0019027-T01-IM6	5	1	40	Female	Metastasis	Unknown	PD-1/PD-L1	4.38857
P-0000392-T01-IM3	3	1	40	Female	Metastasis	BRCA	PD-1/PD-L1	3.35
P-0006911-T01-IM5	1	1	40	Male	Metastasis	EGC	PD-1/PD-L1	0
P-0008305-T01-IM5	1	1	40	Male	Primary	EGC	PD-1/PD-L1	2.95137
P-0026715-T01-IM6	18.6513	0	40.4	Female	Primary	SKCM	PD-1/PD-L1	6.05289
P-0005383-T01-IM5	49	0	41	Male	Metastasis	SKCM	PD-1/PD-L1	21.64
P-0013106-T01-IM5	49	0	41	Male	Metastasis	EGC	PD-1/PD-L1	14.7568
P-0005808-T01-IM5	48	0	41	Male	Primary	RCC	PD-1/PD-L1	4.92
P-0010241-T01-IM5	16	0	41	Female	Metastasis	HNSC	PD-1/PD-L1	66.8977
P-0005762-T01-IM5	10	0	41	Male	Metastasis	CRC	PD-1/PD-L1	1.96758
P-0018580-T01-IM6	5	1	41	Female	Primary	CRC	PD-1/PD-L1	4.38857
P-0009180-T01-IM5	4	1	41	Female	Metastasis	SKCM	Combination	1.97
P-0008798-T01-IM5	3	1	41	Male	Metastasis	HNSC	PD-1/PD-L1	0.983789
P-0007124-T01-IM5	2	1	41	Male	Primary	BG	PD-1/PD-L1	4.92
P-0008248-T01-IM5	2	1	41	Male	Primary	HNSC	PD-1/PD-L1	12.7893
P-0021584-T01-IM6	18.6842	0	41.1	Female	Primary	SKCM	PD-1/PD-L1	17.294
P-0026008-T01-IM6	52.5987	0	41.2	Female	Metastasis	SKCM	PD-1/PD-L1	71.7699
P-0012194-T01-IM5	60	0	41.8	Male	Primary	SKCM	PD-1/PD-L1	33.2765
P-0004132-T01-IM5	22	1	42	Male	Metastasis	SKCM	Combination	5.9
P-0010516-T01-IM5	22	0	42	Female	Primary	BG	PD-1/PD-L1	2.95
P-0009527-T01-IM5	19	0	42	Female	Metastasis	SKCM	Combination	13.77
P-0013078-T01-IM5	19	0	42	Female	Metastasis	RCC	PD-1/PD-L1	2.95
P-0015977-T01-IM6	17	0	42	Female	Metastasis	SKCM	Combination	2.63
P-0005794-T01-IM5	14	0	42	Male	Metastasis	RCC	PD-1/PD-L1	1.97
P-0007314-T01-IM5	9	1	42	Male	Primary	BG	PD-1/PD-L1	0.98
P-0010825-T01-IM5	8	0	42	Male	Primary	EGC	PD-1/PD-L1	0
P-0004605-T01-IM5	7	0	42	Male	Primary	EGC	PD-1/PD-L1	5.90273
P-0000563-T01-IM3	6	1	42	Male	Primary	NSCLC	PD-1/PD-L1	3.35
P-0002647-T01-IM3	4	1	42	Male	Primary	BG	PD-1/PD-L1	4.46
P-0013029-T01-IM5	3	1	42	Male	Primary	BG	PD-1/PD-L1	30.5
P-0016402-T01-IM6	3	1	42	Male	Metastasis	BLCA	PD-1/PD-L1	1.75543
P-0010891-T01-IM5	2	1	42	Female	Metastasis	NSCLC	Combination	0.98
P-0035511-T01-IM6	60	0	42.4	Female	Metastasis	SKCM	PD-1/PD-L1	14.6999
P-0014969-T01-IM6	31.3158	0	42.6	Male	Metastasis	SKCM	PD-1/PD-L1	10.3764
P-0017003-T01-IM6	26.9737	0	42.7	Female	Primary	SKCM	PD-1/PD-L1	12.9705
P-0006476-T01-IM5	58	1	43	Male	Metastasis	SKCM	CTLA-4	12.79
P-0004783-T01-IM5	21	0	43	Male	Primary	CRC	Combination	47.2219
P-0004812-T01-IM5	21	0	43	Male	Primary	BG	PD-1/PD-L1	3.94
P-0005712-T01-IM5	20	0	43	Female	Primary	BRCA	CTLA-4	3.94
P-0003719-T01-IM5	15	1	43	Female	Metastasis	BLCA	PD-1/PD-L1	48.2057
P-0001785-T02-IM3	13	0	43	Female	Primary	BRCA	PD-1/PD-L1	2.23
P-0002507-T01-IM3	10	1	43	Female	Primary	SKCM	PD-1/PD-L1	5.58
P-0015456-T01-IM6	10	0	43	Female	Primary	BLCA	PD-1/PD-L1	6.144
P-0002789-T01-IM3	9	1	43	Female	Metastasis	BRCA	CTLA-4	2.23
P-0002465-T01-IM3	4	1	43	Male	Metastasis	EGC	Combination	12.2677
P-0002646-T01-IM3	4	1	43	Male	Primary	NSCLC	PD-1/PD-L1	6.69
P-0006227-T01-IM5	4	1	43	Female	Metastasis	BRCA	PD-1/PD-L1	6.89
P-0025245-T01-IM6	3.5	1	43	Male	Metastasis	NSCLC	PD-1/PD-L1	51.8
P-0000699-T01-IM3	3	0	43	Male	Primary	CRC	Combination	5.57622
P-0025471-T01-IM6	2	0	43	Male	Metastasis	EGC	PD-1/PD-L1	4.38857
P-0003521-T02-IM5	1	1	43	Male	Primary	EGC	PD-1/PD-L1	6.88652
P-0017602-T01-IM5	1	1	43	Female	Metastasis	Unknown	Combination	2.95137
P-0018665-T01-IM6	1	0	43	Male	Primary	Unknown	Combination	7.89943
P-0026361-T01-IM6	60	0	43.1	Female	Metastasis	SKCM	PD-1/PD-L1	2.59409
P-0033610-T01-IM6	60	0	43.2	Male	Metastasis	SKCM	PD-1/PD-L1	3.45879
P-0027084-T01-IM6	15.8224	0	43.3	Male	Metastasis	SKCM	PD-1/PD-L1	25.0762
P-0010140-T02-IM5	53.8816	0	43.5	Female	Metastasis	SKCM	PD-1/PD-L1	1.95744
P-0022886-T01-IM6	60	0	43.8	Male	Metastasis	SKCM	PD-1/PD-L1	19.8881
P-0014148-T01-IM5	60	0	44	Female	Metastasis	SKCM	CTLA-4	47.22
P-0005187-T01-IM5	33	0	44	Female	Metastasis	RCC	Combination	6.89
P-0004458-T01-IM5	24	0	44	Male	Primary	RCC	PD-1/PD-L1	6.89
P-0004103-T01-IM5	23	1	44	Female	Primary	NSCLC	Combination	0.98
P-0006539-T01-IM5	21	1	44	Male	Primary	RCC	Combination	4.92
P-0018722-T01-IM6	18.8	0	44	Female	Metastasis	NSCLC	PD-1/PD-L1	19.3
P-0019297-T01-IM6	11	0	44	Female	Primary	HNSC	PD-1/PD-L1	5.26629
P-0023128-T01-IM6	11	0	44	Male	Primary	CRC	PD-1/PD-L1	12.288
P-0001771-T01-IM3	10	1	44	Female	Primary	CRC	PD-1/PD-L1	4.46097
P-0005998-T01-IM5	9	1	44	Male	Metastasis	CRC	PD-1/PD-L1	3.93516
P-0006842-T01-IM5	9	1	44	Female	Metastasis	BRCA	Combination	5.9
P-0002015-T01-IM3	8	1	44	Female	Primary	BG	PD-1/PD-L1	2.23
P-0013956-T01-IM5	8	1	44	Female	Metastasis	SKCM	PD-1/PD-L1	6.89
P-0000621-T01-IM3	7	1	44	Male	Metastasis	HNSC	PD-1/PD-L1	5.57622
P-0005897-T02-IM5	5	1	44	Male	Metastasis	NSCLC	PD-1/PD-L1	5.9
P-0007014-T01-IM5	5	1	44	Female	Primary	BRCA	CTLA-4	2.95
P-0000121-T01-IM3	4	0	44	Male	Primary	EGC	PD-1/PD-L1	3.34573
P-0009727-T01-IM5	4	1	44	Female	Primary	BRCA	CTLA-4	0.98
P-0019916-T01-IM6	2	0	44	Female	Primary	EGC	Combination	3.51086
P-0001314-T01-IM3	1	1	44	Female	Metastasis	NSCLC	PD-1/PD-L1	2.23
P-0003913-T01-IM3	1	1	44	Female	Primary	NSCLC	PD-1/PD-L1	3.35
P-0011594-T01-IM5	60	0	44.1	Female	Metastasis	SKCM	PD-1/PD-L1	11.7446
P-0027603-T01-IM6	28.5526	0	44.2	Female	Metastasis	SKCM	PD-1/PD-L1	25.9409
P-0037913-T01-IM6	3.71711	0	44.6	Female	Primary	SKCM	PD-1/PD-L1	41.5055
P-0024605-T01-IM6	60	0	44.9	Male	Metastasis	SKCM	PD-1/PD-L1	14.6999
P-0007088-T02-IM5	32	1	45	Female	Metastasis	NSCLC	PD-1/PD-L1	4.92
P-0008005-T01-IM5	27	0	45	Male	Metastasis	RCC	PD-1/PD-L1	3.94
P-0002485-T01-IM3	24	1	45	Male	Primary	NSCLC	PD-1/PD-L1	3.35
P-0012446-T01-IM5	20	0	45	Female	Metastasis	SKCM	Combination	26.56
P-0004971-T01-IM5	17	1	45	Male	Primary	BG	PD-1/PD-L1	4.92
P-0004778-T01-IM5	16	1	45	Male	Primary	BG	PD-1/PD-L1	0.98
P-0014229-T01-IM6	16	0	45	Female	Metastasis	SKCM	PD-1/PD-L1	30.72
P-0016562-T01-IM6	16	0	45	Male	Metastasis	HNSC	PD-1/PD-L1	7.89943
P-0001706-T01-IM3	15	1	45	Male	Metastasis	SKCM	PD-1/PD-L1	22.3
P-0001121-T01-IM3	10	1	45	Female	Primary	NSCLC	PD-1/PD-L1	1.12
P-0008380-T01-IM5	10	1	45	Male	Primary	BG	PD-1/PD-L1	2.95
P-0003456-T01-IM5	9	1	45	Female	Primary	BG	PD-1/PD-L1	3.94
P-0010004-T01-IM5	9	1	45	Female	Primary	BG	PD-1/PD-L1	3.94
P-0014323-T01-IM6	8	1	45	Female	Metastasis	Unknown	PD-1/PD-L1	14.9212
P-0015346-T01-IM6	8	0	45	Female	Primary	BG	PD-1/PD-L1	2.63
P-0006330-T01-IM5	7	1	45	Male	Metastasis	Unknown	PD-1/PD-L1	1.96758
P-0006672-T01-IM5	7	1	45	Male	Primary	BG	PD-1/PD-L1	5.9
P-0017815-T01-IM6	3.28947	1	45	Female	Metastasis	SKCM	PD-1/PD-L1	4.32349
P-0016243-T01-IM6	3	1	45	Male	Metastasis	HNSC	PD-1/PD-L1	0
P-0002855-T01-IM3	2	1	45	Female	Primary	CRC	Combination	5.57622
P-0007748-T01-IM5	2	1	45	Male	Metastasis	EGC	Combination	1.96758
P-0018198-T01-IM6	1.6	1	45	Female	Metastasis	NSCLC	PD-1/PD-L1	2.6
P-0004416-T01-IM5	1	1	45	Male	Metastasis	HNSC	PD-1/PD-L1	1.96758
P-0027088-T01-IM6	1	1	45	Male	Metastasis	NSCLC	PD-1/PD-L1	1.8
P-0025565-T01-IM6	33.5855	0	45.2	Male	Metastasis	SKCM	PD-1/PD-L1	13.8352
P-0028681-T01-IM6	60	0	45.3	Male	Metastasis	SKCM	PD-1/PD-L1	19.8881
P-0025561-T01-IM6	60	0	45.3	Male	Metastasis	SKCM	PD-1/PD-L1	5.18819
P-0016328-T01-IM6	60	0	45.3	Male	Metastasis	SKCM	PD-1/PD-L1	12.1058
P-0008360-T01-IM5	48.7171	0	45.3	Male	Metastasis	SKCM	PD-1/PD-L1	9.7872
P-0031177-T01-IM6	60	0	45.4	Male	Metastasis	SKCM	PD-1/PD-L1	9.51168
P-0012407-T01-IM5	60	0	45.4	Female	Metastasis	SKCM	PD-1/PD-L1	22.5106
P-0020885-T01-IM6	57.5	0	45.4	Male	Metastasis	SKCM	PD-1/PD-L1	6.05289
P-0038079-T01-IM6	8.05921	0	45.4	Female	Metastasis	SKCM	PD-1/PD-L1	1.7294
P-0026015-T01-IM6	45.1974	1	45.7	Male	Metastasis	SKCM	PD-1/PD-L1	3.45879
P-0036862-T01-IM6	38.4868	0	45.7	Male	Metastasis	SKCM	PD-1/PD-L1	7.78228
P-0011297-T01-IM5	60	0	46	Male	Metastasis	SKCM	CTLA-4	4.92
P-0008963-T01-IM5	44	0	46	Male	Metastasis	SKCM	CTLA-4	8.85
P-0007310-T01-IM5	31	0	46	Female	Primary	RCC	Combination	8.85
P-0010140-T01-IM5	21	0	46	Female	Metastasis	SKCM	PD-1/PD-L1	0
P-0020878-T01-IM6	18	0	46	Male	Metastasis	CRC	PD-1/PD-L1	2.63314
P-0016506-T01-IM6	14	0	46	Female	Metastasis	SKCM	PD-1/PD-L1	3.51
P-0003970-T01-IM5	12	1	46	Female	Metastasis	NSCLC	PD-1/PD-L1	2.95
P-0001371-T01-IM3	10	1	46	Male	Metastasis	CRC	PD-1/PD-L1	0
P-0003051-T01-IM5	7	1	46	Male	Metastasis	BLCA	Combination	10.8217
P-0014418-T01-IM6	5	1	46	Male	Primary	BLCA	PD-1/PD-L1	14.9212
P-0019540-T01-IM6	2	1	46	Male	Metastasis	HNSC	PD-1/PD-L1	7.02172
P-0005635-T01-IM5	1	0	46	Female	Primary	BG	PD-1/PD-L1	5.9
P-0015331-T01-IM6	1	1	46	Male	Primary	EGC	Combination	17.5543
P-0022392-T01-IM6	20.1645	0	46.2	Female	Metastasis	SKCM	PD-1/PD-L1	0.864698
P-0018854-T01-IM6	60	0	46.6	Female	Metastasis	SKCM	PD-1/PD-L1	10.3764
P-0034178-T01-IM6	23.5197	0	46.9	Female	Metastasis	SKCM	PD-1/PD-L1	6.91758
P-0013035-T01-IM5	55	0	47	Female	Metastasis	SKCM	CTLA-4	3.94
P-0009148-T01-IM5	45	0	47	Male	Metastasis	SKCM	CTLA-4	14.76
P-0006550-T01-IM5	39	0	47	Male	Primary	RCC	PD-1/PD-L1	1.97
P-0006055-T01-IM5	24	1	47	Female	Metastasis	RCC	Combination	5.9
P-0002353-T01-IM3	21	1	47	Female	Metastasis	SKCM	CTLA-4	20.07
P-0000103-T01-IM3	18	1	47	Male	Metastasis	EGC	Combination	6.69146
P-0015679-T01-IM6	18	0	47	Male	Metastasis	SKCM	Combination	5.27
P-0005320-T01-IM5	17	1	47	Male	Primary	NSCLC	PD-1/PD-L1	7.87
P-0017678-T01-IM6	14	0	47	Male	Metastasis	HNSC	PD-1/PD-L1	10.5326
P-0013259-T01-IM5	13	1	47	Female	Primary	BG	PD-1/PD-L1	3.94
P-0019272-T01-IM6	12	0	47	Female	Primary	EGC	PD-1/PD-L1	7.89943
P-0008944-T01-IM5	11	1	47	Female	Primary	NSCLC	PD-1/PD-L1	10.82
P-0013243-T01-IM5	8	1	47	Female	Primary	BG	PD-1/PD-L1	5.9
P-0002042-T01-IM3	7	1	47	Male	Primary	CRC	PD-1/PD-L1	11.1524
P-0003365-T01-IM5	7	1	47	Male	Metastasis	CRC	PD-1/PD-L1	1.96758
P-0003921-T01-IM5	7	0	47	Male	Metastasis	SKCM	Combination	15.74
P-0005711-T01-IM5	6	1	47	Male	Metastasis	NSCLC	PD-1/PD-L1	2.95
P-0003970-T02-IM5	5.83	0	47	Female	Metastasis	NSCLC	PD-1/PD-L1	1.95744
P-0005871-T01-IM5	5.6	1	47	Male	Metastasis	NSCLC	PD-1/PD-L1	3
P-0012323-T01-IM5	5	1	47	Female	Metastasis	RCC	PD-1/PD-L1	4.92
P-0021470-T01-IM6	2.5	1	47	Male	Metastasis	NSCLC	PD-1/PD-L1	10.5
P-0004259-T01-IM5	2	1	47	Male	Primary	BG	PD-1/PD-L1	5.9
P-0008645-T02-IM6	1.7	1	47	Male	Metastasis	NSCLC	PD-1/PD-L1	2.6
P-0005304-T01-IM5	1	1	47	Female	Primary	SKCM	Combination	1.97
P-0005309-T01-IM5	1	1	47	Male	Metastasis	Unknown	PD-1/PD-L1	25.5785
P-0010381-T01-IM5	1	0	47	Male	Metastasis	Unknown	PD-1/PD-L1	1.96758
P-0019475-T01-IM6	1	1	47	Male	Metastasis	CRC	PD-1/PD-L1	93.0378
P-0011260-T01-IM5	0.6	1	47	Female	Metastasis	NSCLC	Combination	11.8
P-0030546-T01-IM6	28.7829	0	47.1	Female	Metastasis	SKCM	PD-1/PD-L1	23.3468
P-0018759-T01-IM6	58.9145	1	47.2	Male	Metastasis	SKCM	PD-1/PD-L1	9.51168
P-0015526-T01-IM6	28.9474	0	47.2	Male	Metastasis	SKCM	PD-1/PD-L1	31.9938
P-0013910-T01-IM5	60	0	47.4	Female	Metastasis	SKCM	PD-1/PD-L1	21.5318
P-0024305-T01-IM6	52.1382	0	47.5	Male	Metastasis	SKCM	PD-1/PD-L1	14.6999
P-0030135-T01-IM6	25.2961	0	47.5	Female	Primary	SKCM	PD-1/PD-L1	8.64698
P-0017943-T01-IM6	60	0	47.7	Male	Metastasis	SKCM	PD-1/PD-L1	8.64698
P-0012884-T01-IM5	60	0	48	Male	Metastasis	SKCM	PD-1/PD-L1	0.97872
P-0006935-T01-IM5	30	1	48	Male	Primary	RCC	PD-1/PD-L1	2.95
P-0003401-T01-IM5	25	1	48	Female	Metastasis	SKCM	CTLA-4	0.98
P-0009308-T01-IM5	22	0	48	Female	Metastasis	SKCM	Combination	1.97
P-0006724-T01-IM5	18	0	48	Female	Metastasis	NSCLC	PD-1/PD-L1	23.61
P-0014379-T01-IM6	17	0	48	Male	Metastasis	SKCM	PD-1/PD-L1	1.76
P-0006221-T01-IM5	13	1	48	Female	Primary	NSCLC	PD-1/PD-L1	0
P-0006970-T01-IM5	12	1	48	Male	Primary	BG	PD-1/PD-L1	4.92
P-0001702-T01-IM3	9	1	48	Female	Primary	CRC	PD-1/PD-L1	5.57622
P-0002181-T01-IM3	9	1	48	Male	Primary	BG	PD-1/PD-L1	3.35
P-0020226-T01-IM6	9	0	48	Male	Primary	EGC	PD-1/PD-L1	0.877715
P-0019691-T01-IM6	8	0	48	Male	Metastasis	EGC	PD-1/PD-L1	28.0869
P-0003598-T01-IM5	6	1	48	Female	Primary	BG	PD-1/PD-L1	1.97
P-0013335-T01-IM5	6	1	48	Male	Primary	RCC	PD-1/PD-L1	1.97
P-0022520-T01-IM6	6	0	48	Male	Primary	BLCA	PD-1/PD-L1	70.2172
P-0018366-T01-IM6	5.8	0	48	Male	Metastasis	NSCLC	PD-1/PD-L1	12.3
P-0001665-T01-IM3	5	1	48	Female	Primary	NSCLC	PD-1/PD-L1	1.12
P-0003559-T01-IM5	5	0	48	Female	Primary	EGC	Combination	0
P-0022977-T01-IM6	5	0	48	Female	Metastasis	CRC	PD-1/PD-L1	2.63314
P-0010966-T01-IM5	4	0	48	Male	Metastasis	CRC	PD-1/PD-L1	3.93516
P-0012529-T01-IM5	4	1	48	Male	Metastasis	SKCM	PD-1/PD-L1	11.81
P-0025224-T01-IM6	4	0	48	Male	Primary	EGC	PD-1/PD-L1	13.1657
P-0009763-T01-IM5	1.57	1	48	Female	Metastasis	NSCLC	Combination	1.95744
P-0032984-T01-IM6	60	0	48.2	Female	Metastasis	SKCM	PD-1/PD-L1	19.0234
P-0023645-T01-IM6	60	0	48.2	Female	Metastasis	SKCM	PD-1/PD-L1	9.51168
P-0032896-T01-IM6	34.0789	0	48.2	Male	Metastasis	SKCM	PD-1/PD-L1	6.91758
P-0015106-T01-IM6	26.0197	1	48.3	Male	Primary	SKCM	PD-1/PD-L1	20.7528
P-0017636-T01-IM5	16.9408	1	48.4	Male	Metastasis	SKCM	PD-1/PD-L1	1.95744
P-0033354-T01-IM6	11.4145	0	48.4	Male	Primary	SKCM	PD-1/PD-L1	2.59409
P-0017461-T01-IM6	60	0	48.7	Male	Metastasis	SKCM	PD-1/PD-L1	6.91758
P-0011467-T01-IM5	25.2632	0	48.7	Female	Metastasis	SKCM	PD-1/PD-L1	66.5529
P-0006952-T01-IM5	60	0	49	Male	Metastasis	SKCM	CTLA-4	18.69
P-0000268-T01-IM3	35	0	49	Male	Metastasis	BLCA	PD-1/PD-L1	6.69146
P-0003621-T01-IM5	35	0	49	Female	Metastasis	SKCM	Combination	2.95
P-0009788-T01-IM5	24	0	49	Male	Metastasis	RCC	PD-1/PD-L1	1.97
P-0002633-T01-IM3	21	1	49	Male	Primary	BG	Combination	22.3
P-0012115-T01-IM5	19	0	49	Male	Primary	CRC	PD-1/PD-L1	54.1084
P-0011476-T01-IM5	16	0	49	Male	Metastasis	SKCM	PD-1/PD-L1	6.89
P-0018185-T01-IM6	14	0	49	Female	Primary	HNSC	PD-1/PD-L1	5.26629
P-0003967-T01-IM5	13	0	49	Female	Metastasis	NSCLC	PD-1/PD-L1	4.92
P-0015085-T01-IM6	10	1	49	Female	Metastasis	NSCLC	PD-1/PD-L1	7.02
P-0004552-T01-IM5	9	1	49	Male	Metastasis	EGC	Combination	1.96758
P-0007081-T02-IM5	3	1	49	Male	Metastasis	CRC	PD-1/PD-L1	2.95137
P-0018800-T01-IM6	3	0	49	Male	Primary	EGC	Combination	8.77715
P-0003241-T01-IM5	2	1	49	Female	Primary	BRCA	Combination	2.95
P-0013283-T01-IM5	2	1	49	Male	Metastasis	BLCA	PD-1/PD-L1	6.88652
P-0025777-T01-IM6	1.6	1	49	Female	Metastasis	NSCLC	PD-1/PD-L1	2.6
P-0000704-T01-IM3	1	1	49	Female	Metastasis	BRCA	CTLA-4	10.04
P-0005553-T01-IM5	1	1	49	Male	Metastasis	NSCLC	PD-1/PD-L1	4.92
P-0023775-T01-IM6	60	0	49.1	Male	Metastasis	SKCM	PD-1/PD-L1	5.18819
P-0021458-T01-IM6	35.4605	0	49.6	Male	Metastasis	SKCM	PD-1/PD-L1	17.294
P-0017054-T01-IM6	32.6645	1	49.6	Male	Metastasis	SKCM	PD-1/PD-L1	1.7294
P-0027808-T01-IM6	34.9013	1	49.7	Male	Primary	SKCM	PD-1/PD-L1	15.5646
P-0016853-T02-IM6	45.3618	0	49.9	Female	Metastasis	SKCM	PD-1/PD-L1	13.8352
P-0025907-N01-IM6	60	0	50	Male	Metastasis	SKCM	PD-1/PD-L1	3.45879
P-0002820-T01-IM3	38	0	50	Female	Metastasis	RCC	PD-1/PD-L1	4.46
P-0004348-T01-IM5	32	0	50	Female	Metastasis	SKCM	Combination	24.59
P-0008403-T01-IM5	24	0	50	Male	Metastasis	SKCM	Combination	21.64
P-0011095-T01-IM5	24	0	50	Male	Primary	RCC	PD-1/PD-L1	0
P-0008445-T01-IM5	18	0	50	Male	Metastasis	SKCM	Combination	6.89
P-0000247-T01-IM3	17	0	50	Female	Metastasis	BRCA	Combination	2.23
P-0000670-T01-IM3	17	0	50	Female	Primary	NSCLC	Combination	5.58
P-0014677-T01-IM6	17	0	50	Male	Primary	BG	PD-1/PD-L1	2.63
P-0005489-T01-IM5	16	1	50	Male	Metastasis	BLCA	PD-1/PD-L1	12.7893
P-0007504-T01-IM5	16	1	50	Male	Primary	BG	PD-1/PD-L1	2.95
P-0001543-T01-IM3	15	1	50	Male	Primary	EGC	Combination	4.46097
P-0008571-T01-IM5	15	0	50	Female	Metastasis	BRCA	PD-1/PD-L1	1.97
P-0010556-T01-IM5	15	1	50	Male	Primary	BG	PD-1/PD-L1	0.98
P-0013544-T02-IM6	13	1	50	Male	Metastasis	BG	PD-1/PD-L1	4.39
P-0015600-T01-IM6	13	1	50	Female	Metastasis	NSCLC	PD-1/PD-L1	4.39
P-0003567-T01-IM5	12	1	50	Male	Primary	BG	PD-1/PD-L1	3.94
P-0007384-T01-IM5	12	1	50	Male	Primary	HNSC	Combination	4.91895
P-0002941-T01-IM3	11	1	50	Male	Metastasis	RCC	PD-1/PD-L1	2.23
P-0005539-T01-IM5	8	1	50	Female	Primary	BG	PD-1/PD-L1	2.95
P-0019267-T01-IM6	7	0	50	Female	Primary	CRC	PD-1/PD-L1	5.26629
P-0001179-T01-IM3	6	1	50	Female	Primary	SKCM	PD-1/PD-L1	3.35
P-0002730-T01-IM3	6	1	50	Male	Primary	CRC	PD-1/PD-L1	4.46097
P-0007978-T01-IM5	6	1	50	Female	Metastasis	NSCLC	PD-1/PD-L1	10.82
P-0021304-T01-IM6	6	0	50	Male	Metastasis	CRC	PD-1/PD-L1	85.1384
P-0021841-T01-IM6	6	0	50	Female	Metastasis	Unknown	PD-1/PD-L1	5.26629
P-0003814-T01-IM5	5	0	50	Female	Primary	BLCA	PD-1/PD-L1	2.95137
P-0006213-T01-IM5	5	1	50	Male	Metastasis	CRC	PD-1/PD-L1	8.8541
P-0008340-T01-IM5	5	1	50	Female	Metastasis	RCC	PD-1/PD-L1	3.94
P-0011538-T01-IM5	3	1	50	Male	Metastasis	Unknown	PD-1/PD-L1	0.983789
P-0012803-T01-IM5	3	0	50	Female	Metastasis	BRCA	CTLA-4	4.92
P-0024270-T01-IM6	2	0	50	Male	Primary	EGC	Combination	4.38857
P-0003551-T02-IM6	1.3	1	50	Female	Metastasis	NSCLC	PD-1/PD-L1	11.4
P-0002440-T01-IM3	60	0	50.2	Female	Metastasis	SKCM	PD-1/PD-L1	22.1831
P-0021174-T01-IM6	49.0789	0	50.4	Female	Metastasis	SKCM	PD-1/PD-L1	13.8352
P-0011216-T01-IM5	25.8224	1	50.4	Female	Metastasis	SKCM	PD-1/PD-L1	17.617
P-0020564-T02-IM6	10.6579	1	50.4	Female	Metastasis	SKCM	PD-1/PD-L1	28.535
P-0025347-T01-IM6	60	0	50.6	Male	Metastasis	SKCM	PD-1/PD-L1	23.3468
P-0022570-T01-IM6	60	0	50.8	Male	Metastasis	SKCM	PD-1/PD-L1	6.91758
P-0032739-T01-IM6	40.4605	0	50.8	Female	Metastasis	SKCM	PD-1/PD-L1	9.51168
P-0038817-T01-IM6	60	0	51	Male	Metastasis	SKCM	PD-1/PD-L1	6.91758
P-0033782-T01-IM6	52.6316	0	51	Male	Metastasis	SKCM	PD-1/PD-L1	26.8056
P-0016533-T01-IM6	52.4671	0	51	Male	Metastasis	SKCM	PD-1/PD-L1	6.05289
P-0003868-T01-IM5	49	1	51	Male	Metastasis	SKCM	Combination	13.77
P-0001385-T01-IM3	40	0	51	Female	Metastasis	NSCLC	Combination	14.5
P-0004397-T01-IM5	38	0	51	Male	Primary	RCC	PD-1/PD-L1	3.94
P-0002380-T01-IM3	32	0	51	Female	Metastasis	SKCM	Combination	11.15
P-0002917-T01-IM3	30	0	51	Female	Primary	NSCLC	PD-1/PD-L1	6.69
P-0009152-T01-IM5	25	0	51	Male	Metastasis	BLCA	PD-1/PD-L1	60.9949
P-0010213-T01-IM5	25	0	51	Female	Metastasis	NSCLC	PD-1/PD-L1	15.74
P-0009717-T01-IM5	24	0	51	Male	Primary	RCC	PD-1/PD-L1	3.94
P-0010791-T01-IM5	24	0	51	Male	Metastasis	RCC	PD-1/PD-L1	3.94
P-0008434-T01-IM5	23	0	51	Female	Metastasis	SKCM	PD-1/PD-L1	52.14
P-0010760-T01-IM5	22	0	51	Male	Primary	NSCLC	PD-1/PD-L1	4.92
P-0012866-T01-IM5	19	1	51	Female	Metastasis	NSCLC	PD-1/PD-L1	5.9
P-0009084-T01-IM5	18	1	51	Male	Metastasis	SKCM	Combination	3.94
P-0000922-T01-IM3	17	1	51	Male	Metastasis	SKCM	CTLA-4	4.46
P-0009764-T01-IM5	16	0	51	Female	Primary	NSCLC	PD-1/PD-L1	22.63
P-0006312-T02-IM5	15.3	0	51	Female	Metastasis	NSCLC	Combination	4.8936
P-0010742-T01-IM5	15	1	51	Female	Metastasis	CRC	PD-1/PD-L1	4.91895
P-0006946-T01-IM5	13	1	51	Male	Primary	SKCM	CTLA-4	2.95
P-0013360-T01-IM5	13	0	51	Male	Primary	BG	PD-1/PD-L1	4.92
P-0002981-T01-IM3	12	1	51	Female	Primary	BG	PD-1/PD-L1	0
P-0005727-T01-IM5	11	1	51	Male	Metastasis	BLCA	Combination	1.96758
P-0002185-T01-IM3	10	1	51	Male	Metastasis	HNSC	PD-1/PD-L1	6.69146
P-0006587-T01-IM5	9	0	51	Male	Primary	CRC	PD-1/PD-L1	10.8217
P-0020113-T01-IM6	9	1	51	Male	Metastasis	HNSC	PD-1/PD-L1	2.63314
P-0000553-T01-IM3	8	1	51	Male	Metastasis	EGC	Combination	6.69146
P-0007484-T01-IM5	7	0	51	Female	Primary	BLCA	PD-1/PD-L1	5.90273
P-0010816-T01-IM5	7	1	51	Male	Primary	HNSC	PD-1/PD-L1	7.87031
P-0033978-T01-IM6	6.2	1	51	Female	Metastasis	NSCLC	PD-1/PD-L1	2.6
P-0003711-T01-IM5	5	1	51	Male	Metastasis	HNSC	PD-1/PD-L1	6.88652
P-0009066-T01-IM5	5	1	51	Male	Primary	EGC	PD-1/PD-L1	9.83789
P-0010254-T03-IM5	3	1	51	Female	Primary	BLCA	PD-1/PD-L1	1.96758
P-0018457-T01-IM6	2	1	51	Male	Metastasis	Unknown	PD-1/PD-L1	3.51086
P-0022034-T01-IM6	2	1	51	Male	Metastasis	BLCA	PD-1/PD-L1	0.877715
P-0024386-T01-IM6	2	0	51	Male	Primary	HNSC	PD-1/PD-L1	7.02172
P-0030237-T01-IM6	38.4211	0	51.2	Female	Metastasis	SKCM	PD-1/PD-L1	0
P-0027076-T01-IM6	29.7039	0	51.4	Female	Metastasis	SKCM	PD-1/PD-L1	5.18819
P-0004554-T01-IM5	37.0724	0	51.5	Male	Primary	SKCM	PD-1/PD-L1	1.95744
P-0033199-T01-IM6	2.07237	0	51.5	Female	Metastasis	SKCM	PD-1/PD-L1	14.6999
P-0038722-T01-IM6	60	0	51.8	Male	Metastasis	SKCM	PD-1/PD-L1	71.7699
P-0027752-T01-IM6	13.3224	1	51.8	Male	Primary	SKCM	PD-1/PD-L1	46.6937
P-0021331-T01-IM6	60	0	51.9	Male	Metastasis	SKCM	PD-1/PD-L1	15.5646
P-0006904-T01-IM5	60	0	52	Male	Metastasis	RCC	PD-1/PD-L1	1.97
P-0006973-T01-IM5	60	0	52	Male	Metastasis	SKCM	PD-1/PD-L1	11.81
P-0001081-T01-IM3	45	0	52	Female	Metastasis	SKCM	CTLA-4	45.72
P-0009368-T01-IM5	38	0	52	Male	Primary	EGC	Combination	1.96758
P-0001171-T01-IM3	29	0	52	Male	Metastasis	NSCLC	PD-1/PD-L1	100.37
P-0006731-T01-IM5	29	0	52	Female	Metastasis	SKCM	Combination	15.74
P-0003009-T01-IM3	28	1	52	Female	Primary	HNSC	Combination	8.92195
P-0024070-T01-IM6	26.7434	1	52	Male	Metastasis	SKCM	PD-1/PD-L1	50.1525
P-0010232-T01-IM5	25	0	52	Male	Metastasis	SKCM	Combination	14.76
P-0017910-T01-IM6	23.5	0	52	Female	Metastasis	NSCLC	PD-1/PD-L1	11.4
P-0006713-T01-IM5	23	0	52	Female	Metastasis	NSCLC	PD-1/PD-L1	45.25
P-0010340-T01-IM5	23	0	52	Male	Metastasis	SKCM	CTLA-4	53.12
P-0009411-T01-IM5	21	1	52	Female	Primary	BG	PD-1/PD-L1	62.96
P-0010238-T01-IM5	21	1	52	Female	Metastasis	CRC	PD-1/PD-L1	7.87031
P-0006071-T01-IM5	19	0	52	Female	Primary	NSCLC	PD-1/PD-L1	17.71
P-0004226-T01-IM5	18	0	52	Male	Primary	BLCA	PD-1/PD-L1	6.88652
P-0005239-T01-IM5	18	0	52	Female	Metastasis	Unknown	PD-1/PD-L1	3.93516
P-0000369-T01-IM3	17	1	52	Female	Primary	EGC	Combination	3.34573
P-0002940-T01-IM3	17	0	52	Male	Metastasis	RCC	PD-1/PD-L1	2.23
P-0000758-T01-IM3	14	1	52	Male	Primary	BG	PD-1/PD-L1	4.46
P-0007090-T02-IM5	13	1	52	Male	Metastasis	CRC	PD-1/PD-L1	4.91895
P-0017414-T01-IM6	12	0	52	Male	Metastasis	HNSC	PD-1/PD-L1	0
P-0019316-T01-IM6	10	1	52	Male	Primary	HNSC	PD-1/PD-L1	8.77715
P-0008718-T01-IM5	8	0	52	Male	Primary	BLCA	PD-1/PD-L1	12.7893
P-0005783-T01-IM5	7	0	52	Female	Metastasis	Unknown	PD-1/PD-L1	65.9139
P-0010744-T01-IM5	5	0	52	Female	Primary	BG	PD-1/PD-L1	100.35
P-0012708-T01-IM5	5	0	52	Female	Primary	CRC	Combination	4.91895
P-0010994-T01-IM5	4	1	52	Female	Metastasis	BRCA	PD-1/PD-L1	3.94
P-0019101-T01-IM6	4	0	52	Female	Primary	BLCA	PD-1/PD-L1	16.6766
P-0008816-T01-IM5	3	1	52	Female	Primary	BLCA	PD-1/PD-L1	0.983789
P-0025544-T01-IM6	3	0	52	Male	Metastasis	HNSC	PD-1/PD-L1	8.77715
P-0000628-T01-IM3	2	1	52	Male	Metastasis	NSCLC	PD-1/PD-L1	4.46
P-0010344-T01-IM5	2	1	52	Male	Primary	BG	PD-1/PD-L1	3.94
P-0023902-T01-IM6	1.8	1	52	Female	Metastasis	NSCLC	PD-1/PD-L1	2.6
P-0000422-T01-IM3	1	1	52	Female	Metastasis	BRCA	CTLA-4	6.69
P-0010945-T01-IM5	1	1	52	Male	Metastasis	NSCLC	PD-1/PD-L1	0
P-0015905-T01-IM6	1	1	52	Female	Primary	BRCA	PD-1/PD-L1	4.39
P-0003620-T02-IM5	60	0	52.3	Female	Metastasis	SKCM	PD-1/PD-L1	20.5531
P-0034042-T01-IM6	60	0	52.4	Male	Metastasis	SKCM	PD-1/PD-L1	30.2644
P-0007544-T01-IM5	44.9671	0	52.4	Male	Metastasis	SKCM	PD-1/PD-L1	55.787
P-0023794-T01-IM6	34.5724	0	52.7	Female	Metastasis	SKCM	PD-1/PD-L1	14.6999
P-0019569-T01-IM6	60	0	52.9	Male	Metastasis	SKCM	PD-1/PD-L1	19.0234
P-0022042-T01-IM6	22.5329	0	52.9	Female	Metastasis	SKCM	PD-1/PD-L1	13.8352
P-0040265-T01-IM6	1.875	0	52.9	Male	Primary	SKCM	PD-1/PD-L1	13.8352
P-0005222-T01-IM5	60	0	53	Male	Metastasis	SKCM	CTLA-4	15.74
P-0002392-T01-IM3	39	0	53	Male	Metastasis	SKCM	CTLA-4	35.69
P-0006334-T01-IM5	38	0	53	Female	Metastasis	RCC	PD-1/PD-L1	2.95
P-0004701-T01-IM5	30	0	53	Female	Primary	NSCLC	PD-1/PD-L1	19.68
P-0006959-T01-IM5	30	0	53	Male	Metastasis	RCC	Combination	1.97
P-0008459-T02-IM5	29	0	53	Male	Primary	RCC	Combination	0.98
P-0003119-T01-IM5	28	0	53	Male	Primary	NSCLC	PD-1/PD-L1	12.79
P-0009706-T01-IM5	26	0	53	Male	Metastasis	RCC	PD-1/PD-L1	22.63
P-0009906-T01-IM5	24	0	53	Male	Primary	RCC	PD-1/PD-L1	3.94
P-0010115-T01-IM5	23	0	53	Male	Metastasis	SKCM	PD-1/PD-L1	53.12
P-0010327-T01-IM5	23	0	53	Male	Primary	SKCM	Combination	0.98
P-0005783-T02-IM6	22.8	0	53	Female	Metastasis	NSCLC	PD-1/PD-L1	90.4
P-0014065-T01-IM5	20	0	53	Female	Metastasis	NSCLC	PD-1/PD-L1	2
P-0005177-T01-IM5	19	1	53	Male	Metastasis	RCC	PD-1/PD-L1	0.98
P-0011401-T01-IM5	19	1	53	Female	Primary	BG	PD-1/PD-L1	2.95
P-0021621-T01-IM6	19	0	53	Female	Metastasis	HNSC	PD-1/PD-L1	3.51086
P-0007806-T01-IM5	18	1	53	Female	Primary	RCC	Combination	2.95
P-0010252-T01-IM5	18	0	53	Female	Metastasis	BRCA	PD-1/PD-L1	4.92
P-0015780-T01-IM6	18	0	53	Male	Primary	NSCLC	PD-1/PD-L1	6.14
P-0011357-T01-IM5	17	0	53	Male	Primary	CRC	PD-1/PD-L1	203.644
P-0013603-T01-IM5	15	1	53	Male	Primary	BG	PD-1/PD-L1	1.97
P-0017044-T01-IM6	13	0	53	Male	Primary	BLCA	PD-1/PD-L1	5.26629
P-0014565-T01-IM6	12	1	53	Female	Primary	CRC	PD-1/PD-L1	6.144
P-0014965-T01-IM6	12	0	53	Male	Metastasis	HNSC	PD-1/PD-L1	1.75543
P-0005687-T01-IM5	11	1	53	Male	Metastasis	SKCM	PD-1/PD-L1	2.95
P-0008785-T01-IM5	11	1	53	Female	Primary	RCC	PD-1/PD-L1	3.94
P-0005795-T01-IM5	10	1	53	Male	Metastasis	Unknown	PD-1/PD-L1	0
P-0006848-T01-IM5	10	1	53	Female	Primary	BG	PD-1/PD-L1	6.89
P-0016767-T01-IM6	10	0	53	Female	Metastasis	CRC	PD-1/PD-L1	13.1657
P-0009365-T01-IM5	9	1	53	Female	Primary	BG	PD-1/PD-L1	4.92
P-0002765-T01-IM3	7	1	53	Male	Metastasis	SKCM	CTLA-4	5.58
P-0008169-T01-IM5	6	1	53	Female	Metastasis	HNSC	PD-1/PD-L1	6.88652
P-0008999-T01-IM5	6	1	53	Male	Metastasis	SKCM	Combination	11.81
P-0021756-T01-IM6	5	0	53	Male	Metastasis	Unknown	PD-1/PD-L1	1.75543
P-0019262-T02-IM6	4.1	1	53	Female	Metastasis	NSCLC	PD-1/PD-L1	33.4
P-0010645-T01-IM5	3	1	53	Male	Primary	NSCLC	PD-1/PD-L1	3.94
P-0001693-T02-IM3	2	1	53	Female	Primary	CRC	PD-1/PD-L1	10.0372
P-0007622-T01-IM5	2	1	53	Male	Metastasis	HNSC	Combination	5.90273
P-0010161-T01-IM5	2	1	53	Male	Metastasis	HNSC	PD-1/PD-L1	0
P-0013354-T01-IM5	2	1	53	Female	Metastasis	CRC	PD-1/PD-L1	4.91895
P-0014898-T01-IM6	2	1	53	Male	Metastasis	HNSC	PD-1/PD-L1	5.26629
P-0019647-T01-IM6	1.9	1	53	Male	Metastasis	NSCLC	PD-1/PD-L1	4.4
P-0020347-T01-IM6	1.5	1	53	Female	Metastasis	NSCLC	PD-1/PD-L1	3.5
P-0016258-T01-IM6	1	1	53	Female	Metastasis	Unknown	PD-1/PD-L1	10.5326
P-0016724-T01-IM6	1	1	53	Male	Metastasis	Unknown	PD-1/PD-L1	2.63314
P-0027626-T01-IM6	15.7237	0	53.1	Male	Metastasis	SKCM	PD-1/PD-L1	7.78228
P-0021121-T01-IM6	60	0	53.2	Female	Metastasis	SKCM	PD-1/PD-L1	19.8881
P-0015386-T01-IM6	60	0	53.2	Male	Metastasis	SKCM	PD-1/PD-L1	47.5584
P-0037755-T01-IM6	24.8684	0	53.2	Male	Primary	SKCM	PD-1/PD-L1	8.64698
P-0028041-T01-IM6	22.0724	0	53.2	Male	Primary	SKCM	PD-1/PD-L1	5.18819
P-0020957-T01-IM6	60	0	53.3	Male	Metastasis	SKCM	PD-1/PD-L1	44.0996
P-0015718-T01-IM6	32.0395	0	53.4	Female	Metastasis	SKCM	PD-1/PD-L1	22.4822
P-0027739-T01-IM6	13.3882	0	53.6	Male	Primary	SKCM	PD-1/PD-L1	8.64698
P-0033003-T01-IM6	60	0	53.7	Male	Metastasis	SKCM	PD-1/PD-L1	57.9348
P-0024595-T01-IM6	36.0197	1	53.7	Male	Metastasis	SKCM	PD-1/PD-L1	1.7294
P-0007980-T01-IM5	58.7829	0	53.8	Male	Metastasis	SKCM	PD-1/PD-L1	9.7872
P-0008557-T02-IM5	41.0855	0	53.8	Female	Primary	SKCM	PD-1/PD-L1	50.8934
P-0039287-T01-IM6	7.79605	0	53.8	Female	Metastasis	SKCM	PD-1/PD-L1	19.0234
P-0035224-T01-IM6	7.10526	0	53.8	Male	Primary	SKCM	PD-1/PD-L1	89.9286
P-0004050-T01-IM3	43	0	54	Male	Primary	BLCA	PD-1/PD-L1	12.2677
P-0002637-T01-IM3	37	0	54	Male	Metastasis	NSCLC	Combination	18.96
P-0007995-T01-IM5	35	0	54	Female	Metastasis	EGC	PD-1/PD-L1	29.5137
P-0003620-T01-IM5	33	0	54	Female	Metastasis	SKCM	CTLA-4	20.66
P-0008137-T01-IM5	33	0	54	Male	Primary	RCC	Combination	2.95
P-0004952-T01-IM5	32	0	54	Male	Metastasis	SKCM	Combination	36.4
P-0007620-T01-IM5	32	0	54	Male	Metastasis	HNSC	PD-1/PD-L1	5.90273
P-0009348-T01-IM5	30	0	54	Male	Metastasis	RCC	Combination	3.94
P-0005361-T01-IM5	25	0	54	Female	Primary	BG	PD-1/PD-L1	3.94
P-0012221-T01-IM5	23	0	54	Male	Primary	RCC	PD-1/PD-L1	3.94
P-0016226-T01-IM6	22	1	54	Female	Metastasis	BRCA	CTLA-4	3.51
P-0000898-T01-IM3	21	1	54	Male	Metastasis	SKCM	CTLA-4	4.46
P-0009833-T01-IM5	20	0	54	Female	Primary	NSCLC	PD-1/PD-L1	32.47
P-0015855-T01-IM6	16	0	54	Male	Metastasis	SKCM	PD-1/PD-L1	11.41
P-0005115-T01-IM5	15	0	54	Male	Metastasis	NSCLC	PD-1/PD-L1	1.97
P-0015521-T01-IM6	15	0	54	Male	Metastasis	SKCM	PD-1/PD-L1	19.31
P-0015530-T01-IM6	15	0	54	Male	Metastasis	SKCM	PD-1/PD-L1	6.14
P-0009110-T01-IM5	14.7	1	54	Female	Metastasis	NSCLC	PD-1/PD-L1	16.7
P-0003117-T01-IM5	13	1	54	Female	Primary	RCC	PD-1/PD-L1	4.92
P-0003783-T01-IM5	13	1	54	Male	Primary	BG	PD-1/PD-L1	2.95
P-0009498-T01-IM5	13	0	54	Female	Metastasis	BRCA	PD-1/PD-L1	4.92
P-0014124-T01-IM5	13	0	54	Female	Primary	SKCM	PD-1/PD-L1	0
P-0016691-T01-IM6	13	0	54	Male	Primary	BG	PD-1/PD-L1	1.76
P-0007839-T01-IM5	11	1	54	Male	Metastasis	HNSC	PD-1/PD-L1	1.96758
P-0010046-T01-IM5	11	1	54	Female	Metastasis	RCC	PD-1/PD-L1	0.98
P-0016634-T01-IM6	10	1	54	Female	Metastasis	Unknown	PD-1/PD-L1	8.77715
P-0015531-T01-IM6	9	1	54	Female	Metastasis	NSCLC	PD-1/PD-L1	5.27
P-0023627-T01-IM6	8	0	54	Male	Primary	EGC	PD-1/PD-L1	0
P-0004294-T01-IM5	7	1	54	Male	Primary	RCC	PD-1/PD-L1	3.94
P-0006114-T01-IM5	7	1	54	Female	Metastasis	NSCLC	PD-1/PD-L1	2.95
P-0001538-T01-IM3	6	1	54	Male	Primary	HNSC	PD-1/PD-L1	5.57622
P-0010094-T01-IM5	6	1	54	Male	Primary	BLCA	PD-1/PD-L1	3.93516
P-0021266-T01-IM6	6	0	54	Female	Metastasis	Unknown	PD-1/PD-L1	23.6983
P-0000793-T02-IM5	5	1	54	Male	Metastasis	EGC	PD-1/PD-L1	3.93516
P-0022788-T01-IM6	4	0	54	Male	Metastasis	EGC	Combination	8.77715
P-0014885-T01-IM6	2.6	1	54	Female	Metastasis	NSCLC	PD-1/PD-L1	1.8
P-0006765-T01-IM5	2	1	54	Female	Metastasis	Unknown	PD-1/PD-L1	3.93516
P-0018341-T01-IM6	2	0	54	Female	Metastasis	Unknown	PD-1/PD-L1	3.51086
P-0024421-T02-IM6	1.5	1	54	Female	Metastasis	NSCLC	PD-1/PD-L1	7
P-0008375-T01-IM5	1	1	54	Female	Metastasis	SKCM	Combination	9.84
P-0003250-T01-IM5	0.9	0	54	Female	Metastasis	NSCLC	PD-1/PD-L1	3.9
P-0005769-T01-IM5	60	0	54.2	Male	Metastasis	SKCM	PD-1/PD-L1	3.91488
P-0028849-T02-IM6	60	0	54.3	Male	Metastasis	SKCM	PD-1/PD-L1	12.9705
P-0024188-T01-IM6	20	0	54.3	Male	Metastasis	SKCM	PD-1/PD-L1	21.6175
P-0006423-T01-IM5	48.8158	0	54.4	Male	Metastasis	SKCM	PD-1/PD-L1	10.7659
P-0015281-T01-IM6	60	0	54.5	Male	Metastasis	SKCM	PD-1/PD-L1	25.0762
P-0026030-T01-IM6	60	0	54.6	Female	Metastasis	SKCM	PD-1/PD-L1	24.2115
P-0028316-T01-IM6	23.0592	0	54.6	Female	Metastasis	SKCM	PD-1/PD-L1	4.32349
P-0026151-T01-IM6	18.6513	0	54.6	Male	Metastasis	SKCM	PD-1/PD-L1	0.864698
P-0026789-T01-IM6	52.0724	0	54.8	Male	Metastasis	SKCM	PD-1/PD-L1	12.1058
P-0016018-T01-IM6	33.4211	1	54.8	Male	Metastasis	SKCM	PD-1/PD-L1	12.9705
P-0013030-T02-IM6	22.0724	0	54.8	Male	Metastasis	SKCM	PD-1/PD-L1	38.9114
P-0033795-T01-IM6	60	0	54.9	Male	Metastasis	SKCM	PD-1/PD-L1	2.59409
P-0032404-T01-IM6	60	0	54.9	Female	Metastasis	SKCM	PD-1/PD-L1	39.7761
P-0003568-T01-IM5	45	0	55	Male	Metastasis	RCC	PD-1/PD-L1	3.94
P-0039426-T01-IM6	36.25	0	55	Male	Metastasis	SKCM	PD-1/PD-L1	23.3468
P-0004983-T01-IM5	34	0	55	Male	Primary	BLCA	Combination	1.96758
P-0005201-T01-IM5	32	0	55	Male	Metastasis	SKCM	Combination	8.85
P-0007556-T01-IM5	29	0	55	Male	Primary	RCC	Combination	8.85
P-0001882-T01-IM3	23	0	55	Male	Primary	BG	PD-1/PD-L1	35.69
P-0009345-T01-IM5	23	0	55	Female	Primary	SKCM	Combination	1.97
P-0004412-T01-IM5	21	0	55	Male	Metastasis	RCC	PD-1/PD-L1	3.94
P-0013938-T01-IM5	21	1	55	Male	Primary	BG	PD-1/PD-L1	1.97
P-0012817-T01-IM5	18	0	55	Male	Metastasis	NSCLC	PD-1/PD-L1	34.43
P-0007693-T01-IM5	17	1	55	Male	Primary	BG	PD-1/PD-L1	5.9
P-0014206-T01-IM6	17	0	55	Male	Metastasis	SKCM	Combination	24.58
P-0008050-T01-IM5	15	0	55	Male	Metastasis	SKCM	PD-1/PD-L1	0.98
P-0008651-T01-IM5	15	0	55	Female	Primary	CRC	PD-1/PD-L1	6.88652
P-0013347-T01-IM5	14	1	55	Male	Primary	BG	PD-1/PD-L1	6.89
P-0015661-T01-IM6	10	0	55	Male	Metastasis	BLCA	PD-1/PD-L1	4.38857
P-0016240-T01-IM6	10	0	55	Female	Primary	HNSC	PD-1/PD-L1	3.51086
P-0022952-T01-IM6	9	0	55	Male	Primary	EGC	PD-1/PD-L1	8.77715
P-0002469-T01-IM3	8	1	55	Male	Metastasis	HNSC	PD-1/PD-L1	3.34573
P-0019771-T01-IM6	7	0	55	Female	Primary	BLCA	PD-1/PD-L1	7.02172
P-0003865-T01-IM5	6	1	55	Female	Primary	BG	PD-1/PD-L1	7.87
P-0007274-T01-IM5	6	0	55	Male	Metastasis	BLCA	PD-1/PD-L1	2.95137
P-0007925-T01-IM5	5	1	55	Male	Primary	HNSC	Combination	4.91895
P-0013656-T01-IM5	5	1	55	Female	Metastasis	NSCLC	PD-1/PD-L1	3.94
P-0016256-T01-IM6	5	1	55	Male	Primary	BG	PD-1/PD-L1	4.39
P-0001408-T01-IM3	4	0	55	Male	Primary	BG	Combination	4.46
P-0002874-T01-IM3	3	1	55	Female	Metastasis	NSCLC	PD-1/PD-L1	14.5
P-0004016-T01-IM5	3	1	55	Male	Primary	EGC	PD-1/PD-L1	5.90273
P-0007970-T01-IM5	3	0	55	Male	Metastasis	SKCM	Combination	11.81
P-0024824-T01-IM6	3	0	55	Male	Metastasis	CRC	PD-1/PD-L1	10.5326
P-0021231-T01-IM6	2.1	1	55	Male	Metastasis	NSCLC	PD-1/PD-L1	7
P-0002745-T01-IM3	2	1	55	Female	Primary	HNSC	PD-1/PD-L1	3.34573
P-0003197-T01-IM5	2	1	55	Male	Metastasis	SKCM	CTLA-4	1.97
P-0007486-T01-IM5	2	1	55	Female	Metastasis	CRC	PD-1/PD-L1	5.90273
P-0010840-T02-IM5	2	1	55	Female	Metastasis	NSCLC	PD-1/PD-L1	10.82
P-0010986-T01-IM5	2	1	55	Female	Primary	NSCLC	PD-1/PD-L1	7.87
P-0023749-T01-IM6	2	0	55	Male	Metastasis	HNSC	PD-1/PD-L1	7.02172
P-0006114-T02-IM5	1.8	1	55	Female	Metastasis	NSCLC	PD-1/PD-L1	3.91488
P-0010300-T01-IM5	1.4	1	55	Male	Metastasis	NSCLC	PD-1/PD-L1	3.9
P-0001633-T01-IM3	1	1	55	Female	Primary	NSCLC	PD-1/PD-L1	4.46
P-0002836-T01-IM3	1	1	55	Female	Primary	BG	PD-1/PD-L1	5.58
P-0003374-T01-IM5	1	1	55	Male	Metastasis	HNSC	PD-1/PD-L1	1.96758
P-0005731-T01-IM5	1	1	55	Male	Metastasis	BLCA	PD-1/PD-L1	24.5947
P-0008246-T02-IM5	60	0	55.1	Female	Metastasis	SKCM	PD-1/PD-L1	76.3401
P-0021774-T02-IM6	60	0	55.1	Male	Metastasis	SKCM	PD-1/PD-L1	74.364
P-0023821-T01-IM6	50.1316	0	55.2	Female	Metastasis	SKCM	PD-1/PD-L1	9.51168
P-0013180-T01-IM5	11.4803	0	55.2	Male	Metastasis	SKCM	PD-1/PD-L1	12.7234
P-0032185-T01-IM6	4.67105	0	55.2	Male	Metastasis	SKCM	PD-1/PD-L1	51.8819
P-0033363-T01-IM6	60	0	55.5	Female	Metastasis	SKCM	PD-1/PD-L1	3.45879
P-0016935-T01-IM6	60	0	55.5	Female	Metastasis	SKCM	PD-1/PD-L1	76.0934
P-0030804-T01-IM6	50.5263	1	55.5	Female	Metastasis	SKCM	PD-1/PD-L1	12.9705
P-0028988-T01-IM6	9.375	1	55.5	Male	Metastasis	SKCM	PD-1/PD-L1	19.0234
P-0024628-T01-IM6	0.953947	1	55.6	Male	Metastasis	SKCM	PD-1/PD-L1	25.9409
P-0009076-T01-IM5	43.2566	1	55.8	Female	Metastasis	SKCM	PD-1/PD-L1	3.91488
P-0024110-T01-IM6	29.3092	1	55.8	Male	Metastasis	SKCM	PD-1/PD-L1	4.32349
P-0020388-T01-IM6	25.3289	0	55.8	Female	Metastasis	SKCM	PD-1/PD-L1	19.8881
P-0015462-T01-IM6	60	0	55.9	Male	Metastasis	SKCM	PD-1/PD-L1	3.45879
P-0039447-T01-IM6	43.6513	0	55.9	Female	Metastasis	SKCM	PD-1/PD-L1	13.8352
P-0033074-T01-IM6	9.01316	0	55.9	Male	Metastasis	SKCM	PD-1/PD-L1	6.05289
P-0003358-T01-IM5	60	0	56	Female	Metastasis	SKCM	PD-1/PD-L1	18.5957
P-0003872-T01-IM5	60	0	56	Female	Metastasis	SKCM	CTLA-4	19.68
P-0004048-T01-IM5	41	1	56	Male	Metastasis	SKCM	PD-1/PD-L1	1.97
P-0009744-T01-IM5	39.0789	0	56	Male	Metastasis	SKCM	PD-1/PD-L1	16.6382
P-0003728-T01-IM5	34	0	56	Male	Metastasis	SKCM	Combination	49.19
P-0003372-T01-IM5	33	0	56	Female	Metastasis	SKCM	Combination	2.95
P-0004933-T01-IM5	33	0	56	Male	Metastasis	SKCM	Combination	14.76
P-0005141-T01-IM5	33	0	56	Male	Primary	BG	PD-1/PD-L1	1.97
P-0005132-T01-IM5	31	0	56	Male	Metastasis	CRC	PD-1/PD-L1	6.88652
P-0001029-T01-IM3	30	1	56	Male	Metastasis	SKCM	CTLA-4	2.23
P-0005226-T01-IM5	29	1	56	Male	Metastasis	RCC	PD-1/PD-L1	2.95
P-0005912-T01-IM5	29	1	56	Male	Primary	BG	PD-1/PD-L1	3.94
P-0008053-T01-IM5	27	0	56	Male	Metastasis	RCC	Combination	2.95
P-0009072-T01-IM5	24	0	56	Male	Metastasis	SKCM	Combination	4.92
P-0009586-T01-IM5	24	0	56	Female	Metastasis	NSCLC	PD-1/PD-L1	11.81
P-0008997-T01-IM5	23	0	56	Female	Metastasis	SKCM	Combination	65.91
P-0016311-T01-IM6	23	0	56	Male	Primary	EGC	PD-1/PD-L1	3.51086
P-0021291-T01-IM6	22.8	0	56	Female	Metastasis	NSCLC	PD-1/PD-L1	19.3
P-0010737-T01-IM5	22	1	56	Male	Metastasis	SKCM	CTLA-4	2.95
P-0002472-T01-IM3	18	1	56	Male	Primary	BLCA	PD-1/PD-L1	3.34573
P-0006738-T01-IM5	18	0	56	Male	Metastasis	RCC	PD-1/PD-L1	3.94
P-0015717-T01-IM6	18	0	56	Male	Primary	SKCM	Combination	1.76
P-0001495-T01-IM3	17	1	56	Male	Primary	EGC	PD-1/PD-L1	6.69146
P-0010199-T01-IM5	17	0	56	Male	Primary	BLCA	PD-1/PD-L1	17.7082
P-0029465-T01-IM6	15.2	0	56	Female	Metastasis	NSCLC	PD-1/PD-L1	10.5
P-0006933-T01-IM5	14	1	56	Female	Primary	CRC	PD-1/PD-L1	4.91895
P-0019765-T02-IM6	12.8	1	56	Female	Metastasis	NSCLC	PD-1/PD-L1	21.1
P-0019098-T01-IM6	12	1	56	Female	Metastasis	NSCLC	PD-1/PD-L1	26.3
P-0002965-T01-IM3	11	1	56	Male	Primary	NSCLC	PD-1/PD-L1	7.81
P-0023553-T01-IM6	10	0	56	Male	Primary	EGC	PD-1/PD-L1	9.65486
P-0013240-T01-IM5	9	1	56	Male	Primary	RCC	PD-1/PD-L1	3.94
P-0009177-T01-IM5	8	1	56	Female	Metastasis	SKCM	Combination	7.87
P-0020903-T01-IM6	8	0	56	Male	Metastasis	EGC	PD-1/PD-L1	7.02172
P-0007567-T01-IM5	7	0	56	Male	Metastasis	CRC	Combination	7.87031
P-0019710-T01-IM6	7	1	56	Male	Primary	CRC	PD-1/PD-L1	7.02172
P-0014507-T01-IM6	6	0	56	Female	Primary	BLCA	Combination	8.77715
P-0005882-T01-IM5	5	1	56	Male	Primary	BG	PD-1/PD-L1	2.95
P-0011036-T01-IM5	4	1	56	Male	Metastasis	NSCLC	PD-1/PD-L1	11.81
P-0018043-T01-IM6	2.8	1	56	Female	Metastasis	NSCLC	PD-1/PD-L1	7
P-0000205-T01-IM3	2	1	56	Female	Metastasis	NSCLC	Combination	5.58
P-0002969-T01-IM3	2	1	56	Male	Metastasis	NSCLC	PD-1/PD-L1	22.3
P-0009088-T01-IM5	2	1	56	Male	Primary	EGC	PD-1/PD-L1	4.91895
P-0009100-T01-IM5	2	1	56	Male	Primary	EGC	PD-1/PD-L1	2.95137
P-0023731-T01-IM6	2	0	56	Female	Metastasis	CRC	PD-1/PD-L1	6.144
P-0024243-T01-IM6	2	0	56	Female	Primary	EGC	PD-1/PD-L1	43.8857
P-0016596-T01-IM6	1.84211	0	56	Female	Primary	SKCM	PD-1/PD-L1	27.6703
P-0011254-T01-IM5	1.53	1	56	Female	Metastasis	NSCLC	Combination	7.82976
P-0005579-T01-IM5	1	1	56	Female	Primary	NSCLC	PD-1/PD-L1	1.97
P-0018601-T01-IM6	1	1	56	Male	Metastasis	Unknown	PD-1/PD-L1	6.144
P-0023086-T01-IM6	1	0	56	Male	Metastasis	Unknown	PD-1/PD-L1	5.26629
P-0016327-T01-IM6	23.5855	0	56.1	Male	Metastasis	SKCM	PD-1/PD-L1	18.1587
P-0038799-T01-IM6	3.91447	0	56.1	Male	Primary	SKCM	PD-1/PD-L1	34.5879
P-0016799-T01-IM6	41.1513	0	56.2	Female	Metastasis	SKCM	PD-1/PD-L1	4.32349
P-0023163-T01-IM6	42.7632	0	56.3	Male	Metastasis	SKCM	PD-1/PD-L1	73.4993
P-0007232-T02-IM6	32.5329	1	56.4	Male	Metastasis	SKCM	PD-1/PD-L1	3.45879
P-0026354-T01-IM6	2.69737	1	56.8	Male	Metastasis	SKCM	PD-1/PD-L1	18.1587
P-0018783-T01-IM6	60	0	56.9	Female	Metastasis	SKCM	PD-1/PD-L1	35.4526
P-0012119-T01-IM5	50.1645	0	56.9	Male	Metastasis	SKCM	PD-1/PD-L1	14.6808
P-0021441-T01-IM6	49.5395	0	56.9	Male	Metastasis	SKCM	PD-1/PD-L1	2.59409
P-0018422-T01-IM6	46.9737	0	56.9	Male	Metastasis	SKCM	PD-1/PD-L1	0.864698
P-0023356-T01-IM6	60	0	57	Female	Metastasis	SKCM	PD-1/PD-L1	49.2878
P-0013343-T01-IM5	60	1	57	Female	Metastasis	SKCM	CTLA-4	19.68
P-0002615-T01-IM3	46	0	57	Female	Primary	RCC	Combination	4.46
P-0004996-T02-IM5	46	1	57	Male	Metastasis	NSCLC	Combination	2.95
P-0005053-T01-IM5	36	0	57	Male	Metastasis	SKCM	Combination	12.79
P-0003721-T01-IM5	35	0	57	Female	Primary	RCC	Combination	2.95
P-0007405-T01-IM5	30	0	57	Male	Primary	CRC	PD-1/PD-L1	6.88652
P-0005913-T01-IM5	26	0	57	Male	Primary	RCC	PD-1/PD-L1	8.85
P-0008332-T01-IM5	26	0	57	Female	Metastasis	NSCLC	PD-1/PD-L1	3.94
P-0008728-T01-IM5	25	0	57	Female	Metastasis	SKCM	Combination	44.27
P-0016238-T01-IM6	23	0	57	Male	Primary	BG	PD-1/PD-L1	2.63
P-0007418-T01-IM5	22	0	57	Female	Metastasis	NSCLC	PD-1/PD-L1	16.72
P-0008964-T01-IM5	21	0	57	Male	Metastasis	RCC	PD-1/PD-L1	1.97
P-0006535-T01-IM5	19	1	57	Female	Metastasis	BLCA	PD-1/PD-L1	5.90273
P-0007656-T01-IM5	18	0	57	Male	Primary	BLCA	PD-1/PD-L1	14.7568
P-0001987-T01-IM3	16.4	0	57	Male	Metastasis	NSCLC	PD-1/PD-L1	26.8
P-0012966-T01-IM5	12	1	57	Female	Primary	SKCM	PD-1/PD-L1	2.95
P-0005121-T02-IM5	11	0	57	Female	Metastasis	SKCM	PD-1/PD-L1	2.95
P-0007232-T01-IM5	10	0	57	Male	Metastasis	SKCM	PD-1/PD-L1	0
P-0016558-T01-IM6	10	1	57	Female	Metastasis	Unknown	PD-1/PD-L1	1.75543
P-0015785-T01-IM6	9	1	57	Female	Primary	NSCLC	PD-1/PD-L1	22.82
P-0002320-T01-IM3	8	1	57	Male	Metastasis	NSCLC	PD-1/PD-L1	6.69
P-0003782-T01-IM5	8	1	57	Male	Metastasis	NSCLC	PD-1/PD-L1	2.95
P-0006441-T01-IM5	8	1	57	Male	Primary	BG	PD-1/PD-L1	4.92
P-0007278-T01-IM5	8	1	57	Female	Primary	NSCLC	PD-1/PD-L1	7.87
P-0013506-T01-IM5	8	0	57	Female	Metastasis	BG	PD-1/PD-L1	57.06
P-0024527-T01-IM6	7	0	57	Male	Metastasis	EGC	Combination	2.63314
P-0002452-T01-IM3	6	1	57	Female	Primary	BG	PD-1/PD-L1	2.23
P-0005254-T01-IM5	5	1	57	Female	Primary	BG	PD-1/PD-L1	1.97
P-0006500-T01-IM5	5	1	57	Male	Primary	BG	PD-1/PD-L1	5.9
P-0001420-T01-IM3	4	1	57	Female	Primary	BG	PD-1/PD-L1	40.15
P-0013294-T01-IM5	4	1	57	Female	Primary	BG	PD-1/PD-L1	3.94
P-0005855-T01-IM5	3	1	57	Female	Metastasis	BRCA	CTLA-4	5.9
P-0003635-T01-IM5	2	1	57	Female	Metastasis	NSCLC	Combination	6.89
P-0004117-T01-IM5	2	1	57	Male	Primary	NSCLC	PD-1/PD-L1	3.94
P-0008258-T01-IM5	2	1	57	Female	Primary	BG	PD-1/PD-L1	3.94
P-0012679-T01-IM5	1.1	1	57	Female	Metastasis	NSCLC	PD-1/PD-L1	3.9
P-0003507-T01-IM5	1	1	57	Male	Metastasis	BLCA	PD-1/PD-L1	4.91895
P-0009563-T01-IM5	1	1	57	Male	Primary	EGC	PD-1/PD-L1	8.8541
P-0039360-T01-IM6	60	0	57.1	Male	Metastasis	SKCM	PD-1/PD-L1	10.3764
P-0032780-T01-IM6	60	0	57.3	Female	Metastasis	SKCM	PD-1/PD-L1	5.18819
P-0019861-T01-IM6	34.5724	0	57.3	Female	Metastasis	SKCM	PD-1/PD-L1	6.91758
P-0004700-T02-IM5	45.8882	1	57.4	Male	Metastasis	SKCM	PD-1/PD-L1	2.93616
P-0027588-T01-IM6	33.0921	0	57.5	Male	Metastasis	SKCM	PD-1/PD-L1	1.7294
P-0029242-T01-IM6	60	0	57.7	Female	Metastasis	SKCM	PD-1/PD-L1	4.32349
P-0037749-T01-IM6	5.82237	0	57.7	Female	Primary	SKCM	PD-1/PD-L1	12.1058
P-0018059-T01-IM6	60	0	57.8	Male	Metastasis	SKCM	PD-1/PD-L1	30.2644
P-0003062-T01-IM5	60	0	57.9	Female	Metastasis	SKCM	PD-1/PD-L1	19.5744
P-0014227-T01-IM6	6.18421	0	57.9	Female	Primary	SKCM	PD-1/PD-L1	38.0467
P-0000768-T01-IM3	35	1	58	Male	Metastasis	HNSC	PD-1/PD-L1	4.46097
P-0000277-T01-IM3	30	1	58	Female	Metastasis	Unknown	PD-1/PD-L1	0
P-0004832-T01-IM5	29	1	58	Male	Metastasis	SKCM	CTLA-4	1.97
P-0004020-T01-IM5	28	1	58	Female	Primary	NSCLC	Combination	4.92
P-0006826-T01-IM5	28	1	58	Male	Metastasis	HNSC	PD-1/PD-L1	4.91895
P-0000012-T03-IM3	27.2	0	58	Female	Metastasis	NSCLC	Combination	32.1655
P-0001135-T02-IM3	27	1	58	Male	Primary	BLCA	PD-1/PD-L1	5.57622
P-0003738-T02-IM5	27	0	58	Female	Metastasis	NSCLC	PD-1/PD-L1	4.92
P-0005791-T01-IM5	25	0	58	Male	Primary	HNSC	PD-1/PD-L1	3.93516
P-0009950-T01-IM5	24	0	58	Male	Metastasis	SKCM	Combination	69.85
P-0005488-T01-IM5	21	1	58	Male	Primary	EGC	PD-1/PD-L1	10.8217
P-0008830-T01-IM5	21	0	58	Male	Primary	RCC	PD-1/PD-L1	1.97
P-0009101-T01-IM5	20	0	58	Male	Metastasis	BLCA	PD-1/PD-L1	10.8217
P-0013189-T01-IM5	20	0	58	Female	Metastasis	NSCLC	PD-1/PD-L1	1.97
P-0003265-T01-IM5	19	1	58	Female	Metastasis	BRCA	CTLA-4	3.94
P-0007540-T01-IM5	19	0	58	Female	Primary	RCC	PD-1/PD-L1	5.9
P-0012856-T01-IM5	18	0	58	Male	Metastasis	SKCM	PD-1/PD-L1	38.37
P-0013380-T01-IM5	17	0	58	Male	Primary	BG	PD-1/PD-L1	2.95
P-0013451-T01-IM5	17	0	58	Female	Metastasis	SKCM	Combination	3.94
P-0026289-T01-IM6	16.6	1	58	Female	Metastasis	NSCLC	PD-1/PD-L1	10.5
P-0009648-T01-IM5	15	1	58	Male	Primary	SKCM	PD-1/PD-L1	0.98
P-0008295-T01-IM5	14	0	58	Male	Metastasis	NSCLC	PD-1/PD-L1	5.9
P-0004120-T01-IM5	12	0	58	Female	Primary	NSCLC	PD-1/PD-L1	0.98
P-0001586-T02-IM5	11	0	58	Male	Metastasis	EGC	PD-1/PD-L1	6.88652
P-0001808-T01-IM3	10	0	58	Male	Metastasis	CRC	PD-1/PD-L1	178.439
P-0010025-T01-IM5	10	1	58	Female	Primary	NSCLC	PD-1/PD-L1	10.82
P-0009414-T01-IM5	9	1	58	Male	Metastasis	BLCA	PD-1/PD-L1	3.93516
P-0002792-T01-IM3	8	0	58	Male	Primary	CRC	PD-1/PD-L1	5.57622
P-0013596-T01-IM5	8	1	58	Male	Primary	SKCM	PD-1/PD-L1	11.81
P-0000978-T01-IM3	7	1	58	Female	Metastasis	NSCLC	PD-1/PD-L1	1.12
P-0019036-T01-IM6	6	0	58	Male	Primary	BLCA	PD-1/PD-L1	6.144
P-0023425-T01-IM6	6	1	58	Male	Metastasis	BLCA	PD-1/PD-L1	12.288
P-0006667-T01-IM5	5	1	58	Male	Primary	BG	PD-1/PD-L1	3.94
P-0009476-T01-IM5	5	1	58	Female	Metastasis	NSCLC	PD-1/PD-L1	7.87
P-0015851-T01-IM6	5	0	58	Male	Primary	CRC	PD-1/PD-L1	30.72
P-0023557-T01-IM6	5	0	58	Male	Primary	HNSC	PD-1/PD-L1	6.144
P-0005822-T01-IM5	4	1	58	Female	Primary	RCC	PD-1/PD-L1	2.95
P-0000913-T02-IM5	3.5	1	58	Female	Metastasis	NSCLC	PD-1/PD-L1	3.91488
P-0001312-T01-IM3	3	1	58	Female	Metastasis	BRCA	PD-1/PD-L1	2.23
P-0000689-T02-IM5	2.57	1	58	Male	Metastasis	NSCLC	PD-1/PD-L1	2.93616
P-0025598-T01-IM6	2.5	1	58	Female	Metastasis	NSCLC	PD-1/PD-L1	13.2
P-0002614-T01-IM3	2	1	58	Male	Metastasis	BLCA	PD-1/PD-L1	7.80671
P-0013831-T01-IM5	1.9	1	58	Female	Metastasis	NSCLC	PD-1/PD-L1	47.2
P-0027133-T01-IM6	1.9	1	58	Female	Metastasis	NSCLC	PD-1/PD-L1	12.3
P-0012894-T01-IM5	1.6	1	58	Female	Metastasis	NSCLC	PD-1/PD-L1	2
P-0008874-T01-IM5	1	1	58	Male	Primary	NSCLC	PD-1/PD-L1	10.82
P-0026723-T01-IM6	1	0	58	Male	Primary	BLCA	PD-1/PD-L1	7.89943
P-0033292-T01-IM6	47.4013	0	58.3	Female	Metastasis	SKCM	PD-1/PD-L1	4.32349
P-0026835-T01-IM6	16.1184	0	58.3	Male	Metastasis	SKCM	PD-1/PD-L1	31.1291
P-0022123-T01-IM6	60	0	58.4	Male	Metastasis	SKCM	PD-1/PD-L1	18.1587
P-0006624-T01-IM5	60	0	58.4	Male	Metastasis	SKCM	PD-1/PD-L1	16.6382
P-0030248-T01-IM6	43.4539	0	58.5	Male	Metastasis	SKCM	PD-1/PD-L1	5.18819
P-0028920-T01-IM6	43.2895	0	58.5	Male	Metastasis	SKCM	PD-1/PD-L1	21.6175
P-0019333-T01-IM6	60	0	58.7	Male	Metastasis	SKCM	PD-1/PD-L1	37.182
P-0020307-T01-IM6	49.4737	0	58.7	Male	Metastasis	SKCM	PD-1/PD-L1	62.2583
P-0014311-T01-IM6	31.5132	0	58.7	Female	Metastasis	SKCM	PD-1/PD-L1	2.59409
P-0036680-T01-IM6	31.25	0	58.7	Female	Metastasis	SKCM	PD-1/PD-L1	16.4293
P-0022168-T01-IM6	38.75	1	58.8	Male	Metastasis	SKCM	PD-1/PD-L1	4.32349
P-0009538-T01-IM5	60	0	58.9	Male	Metastasis	SKCM	PD-1/PD-L1	7.82976
P-0028040-T01-IM6	17.7303	0	58.9	Male	Primary	SKCM	PD-1/PD-L1	12.9705
P-0002626-T01-IM3	60	0	59	Female	Metastasis	BRCA	CTLA-4	0
P-0000604-T01-IM3	57	0	59	Male	Primary	NSCLC	Combination	4.46
P-0004253-T01-IM5	42	1	59	Male	Metastasis	SKCM	CTLA-4	9.84
P-0002311-T01-IM3	39	0	59	Male	Metastasis	BLCA	Combination	18.9591
P-0003368-T01-IM5	38	0	59	Female	Primary	NSCLC	Combination	8.85
P-0004170-T01-IM5	38	0	59	Male	Metastasis	RCC	Combination	2.95
P-0005954-T01-IM5	38	0	59	Male	Primary	RCC	PD-1/PD-L1	2.95
P-0003583-T01-IM5	34	0	59	Male	Metastasis	RCC	Combination	0
P-0004700-T01-IM5	32	1	59	Male	Metastasis	SKCM	PD-1/PD-L1	0
P-0005062-T01-IM5	31	0	59	Female	Metastasis	SKCM	Combination	0.98
P-0003131-T01-IM5	28	0	59	Male	Primary	BLCA	PD-1/PD-L1	7.87031
P-0006503-T01-IM5	27	1	59	Male	Metastasis	RCC	Combination	4.92
P-0010184-T01-IM5	25	0	59	Female	Metastasis	RCC	PD-1/PD-L1	2.95
P-0012682-T01-IM5	23	0	59	Male	Metastasis	RCC	PD-1/PD-L1	5.9
P-0010847-T01-IM5	22	0	59	Male	Primary	SKCM	PD-1/PD-L1	19.68
P-0012080-T01-IM5	21	0	59	Male	Metastasis	SKCM	CTLA-4	25.58
P-0012846-T01-IM5	20	0	59	Female	Metastasis	NSCLC	PD-1/PD-L1	7.87
P-0004827-T01-IM5	19	1	59	Male	Primary	NSCLC	PD-1/PD-L1	7.87
P-0007121-T01-IM5	17	0	59	Female	Primary	NSCLC	PD-1/PD-L1	7.87
P-0003350-T01-IM5	16	1	59	Male	Primary	BG	PD-1/PD-L1	3.94
P-0003347-T01-IM5	15	1	59	Male	Metastasis	NSCLC	PD-1/PD-L1	14.76
P-0016241-T01-IM6	15	0	59	Female	Metastasis	Unknown	PD-1/PD-L1	8.77715
P-0006046-T01-IM5	14	0	59	Male	Primary	NSCLC	PD-1/PD-L1	20.66
P-0004279-T01-IM5	13	0	59	Female	Metastasis	NSCLC	PD-1/PD-L1	2.95
P-0005792-T01-IM5	10	1	59	Male	Metastasis	NSCLC	PD-1/PD-L1	10.82
P-0014147-T01-IM5	10	1	59	Male	Metastasis	RCC	PD-1/PD-L1	6.89
P-0001298-T01-IM3	9	1	59	Male	Primary	EGC	PD-1/PD-L1	6.69146
P-0004366-T01-IM5	9	0	59	Female	Primary	BLCA	Combination	5.90273
P-0015573-T01-IM6	8	0	59	Male	Primary	BG	PD-1/PD-L1	52.66
P-0016289-T01-IM6	8	1	59	Male	Metastasis	Unknown	PD-1/PD-L1	3.51086
P-0016522-T01-IM6	8	0	59	Male	Primary	CRC	PD-1/PD-L1	44.7635
P-0009915-T01-IM5	7	1	59	Male	Metastasis	NSCLC	PD-1/PD-L1	7.87
P-0011149-T01-IM5	7	1	59	Female	Metastasis	Unknown	PD-1/PD-L1	11.8055
P-0004803-T01-IM5	6	0	59	Male	Metastasis	CRC	PD-1/PD-L1	7.87031
P-0021774-T01-IM6	6	0	59	Male	Primary	Unknown	PD-1/PD-L1	91.2824
P-0022688-T01-IM6	6	0	59	Male	Primary	EGC	PD-1/PD-L1	3.51086
P-0009680-T01-IM5	5.4	1	59	Female	Metastasis	NSCLC	PD-1/PD-L1	5.87232
P-0006109-T01-IM5	5	0	59	Female	Metastasis	SKCM	CTLA-4	0.98
P-0007771-T01-IM5	5	1	59	Female	Metastasis	CRC	PD-1/PD-L1	4.91895
P-0008800-T02-IM5	5	1	59	Male	Metastasis	HNSC	PD-1/PD-L1	2.95137
P-0023194-T01-IM6	5	0	59	Male	Primary	EGC	PD-1/PD-L1	2.63314
P-0033239-T01-IM6	4.2	1	59	Female	Metastasis	NSCLC	PD-1/PD-L1	1.8
P-0000721-T01-IM3	4	1	59	Female	Primary	CRC	PD-1/PD-L1	8.92195
P-0007845-T01-IM5	4	0	59	Male	Primary	EGC	PD-1/PD-L1	1.96758
P-0020169-T01-IM6	4	1	59	Male	Primary	EGC	PD-1/PD-L1	6.144
P-0023785-T01-IM6	4	0	59	Male	Metastasis	Unknown	PD-1/PD-L1	17.5543
P-0025120-T01-IM6	4	0	59	Female	Primary	BLCA	PD-1/PD-L1	4.38857
P-0009969-T01-IM5	3	0	59	Male	Primary	HNSC	PD-1/PD-L1	3.93516
P-0013210-T01-IM5	3	1	59	Female	Metastasis	BRCA	PD-1/PD-L1	2.95
P-0013652-T01-IM5	3	1	59	Male	Primary	HNSC	PD-1/PD-L1	9.83789
P-0019240-T01-IM6	3	1	59	Male	Metastasis	HNSC	PD-1/PD-L1	1.75543
P-0000978-T02-IM5	2.1	1	59	Female	Metastasis	NSCLC	PD-1/PD-L1	8.80848
P-0009532-T01-IM5	2	1	59	Male	Metastasis	NSCLC	PD-1/PD-L1	10.82
P-0012189-T01-IM5	2	1	59	Female	Metastasis	HNSC	PD-1/PD-L1	8.8541
P-0025115-T01-IM6	2	0	59	Male	Metastasis	Unknown	PD-1/PD-L1	14.0434
P-0007118-T01-IM5	1	0	59	Female	Primary	EGC	PD-1/PD-L1	6.88652
P-0007997-T01-IM5	1	1	59	Female	Primary	CRC	PD-1/PD-L1	52.1408
P-0015075-T01-IM6	0.4	1	59	Male	Metastasis	NSCLC	PD-1/PD-L1	5.3
P-0029614-T01-IM6	47.4013	1	59.2	Male	Metastasis	SKCM	PD-1/PD-L1	11.2411
P-0036809-T01-IM6	31.6447	0	59.2	Male	Metastasis	SKCM	PD-1/PD-L1	130.569
P-0038279-T01-IM6	52.1382	0	59.3	Female	Metastasis	SKCM	PD-1/PD-L1	37.182
P-0018561-T01-IM6	60	0	59.4	Female	Metastasis	SKCM	PD-1/PD-L1	73.4993
P-0018042-T01-IM6	60	0	59.8	Female	Metastasis	SKCM	PD-1/PD-L1	29.3997
P-0029989-T01-IM6	60	0	59.9	Male	Metastasis	SKCM	PD-1/PD-L1	11.2411
P-0005354-T01-IM5	44	1	60	Male	Metastasis	RCC	PD-1/PD-L1	5.9
P-0013025-T01-IM5	43	0	60	Male	Metastasis	SKCM	CTLA-4	13.77
P-0022807-T04-IM6	34.8026	0	60	Male	Primary	SKCM	PD-1/PD-L1	16.4293
P-0005082-T01-IM5	34	1	60	Male	Metastasis	HNSC	PD-1/PD-L1	0
P-0010311-T01-IM5	34	0	60	Male	Primary	RCC	Combination	7.87
P-0006498-T01-IM5	33	1	60	Male	Metastasis	RCC	PD-1/PD-L1	0
P-0003224-T01-IM5	28	0	60	Female	Metastasis	BRCA	CTLA-4	14.76
P-0007142-T01-IM5	28	0	60	Male	Metastasis	SKCM	PD-1/PD-L1	4.92
P-0004137-T01-IM5	27	0	60	Male	Primary	BLCA	Combination	26.5623
P-0008009-T01-IM5	24	0	60	Male	Metastasis	SKCM	Combination	9.84
P-0009292-T01-IM5	24	0	60	Male	Metastasis	SKCM	PD-1/PD-L1	8.85
P-0009711-T01-IM5	22	1	60	Male	Primary	BG	PD-1/PD-L1	3.94
P-0013463-T01-IM5	20	0	60	Male	Primary	RCC	PD-1/PD-L1	4.92
P-0014064-T01-IM5	20	0	60	Male	Metastasis	RCC	PD-1/PD-L1	1.97
P-0001074-T01-IM3	19	1	60	Male	Metastasis	BLCA	PD-1/PD-L1	22.3049
P-0013967-T01-IM5	18	0	60	Male	Metastasis	RCC	PD-1/PD-L1	7.87
P-0014242-T01-IM6	18	0	60	Male	Metastasis	SKCM	Combination	26.33
P-0014619-T01-IM6	18	0	60	Male	Primary	RCC	PD-1/PD-L1	2.63
P-0017276-T01-IM6	18	1	60	Male	Primary	BLCA	PD-1/PD-L1	5.26629
P-0012550-T01-IM5	16	0	60	Female	Metastasis	SKCM	PD-1/PD-L1	59.03
P-0013412-T01-IM5	13	0	60	Male	Metastasis	SKCM	Combination	3.94
P-0007917-T01-IM5	12	1	60	Male	Primary	BG	PD-1/PD-L1	3.94
P-0025354-T01-IM6	11.1	0	60	Female	Metastasis	NSCLC	PD-1/PD-L1	10.5
P-0003766-T01-IM5	11	1	60	Male	Primary	RCC	PD-1/PD-L1	4.92
P-0019754-T01-IM6	10	0	60	Male	Primary	EGC	PD-1/PD-L1	5.26629
P-0003562-T02-IM5	9.2	1	60	Female	Metastasis	NSCLC	PD-1/PD-L1	36.2126
P-0000184-T01-IM3	8	0	60	Male	Primary	BLCA	PD-1/PD-L1	8.92195
P-0013087-T01-IM5	8	0	60	Male	Metastasis	CRC	Combination	6.88652
P-0017697-T01-IM6	8	1	60	Female	Metastasis	CRC	PD-1/PD-L1	91.2824
P-0000227-T01-IM3	7	0	60	Female	Primary	HNSC	PD-1/PD-L1	0
P-0010826-T01-IM5	7	0	60	Male	Primary	BLCA	PD-1/PD-L1	4.91895
P-0001836-T01-IM3	6	0	60	Female	Metastasis	NSCLC	PD-1/PD-L1	24.54
P-0001669-T01-IM3	5	1	60	Male	Primary	SKCM	CTLA-4	1.12
P-0009714-T01-IM5	5	1	60	Male	Primary	NSCLC	PD-1/PD-L1	19.68
P-0002748-T02-IM5	4	1	60	Male	Primary	BLCA	PD-1/PD-L1	17.7082
P-0007927-T01-IM5	4	1	60	Male	Primary	SKCM	PD-1/PD-L1	0.98
P-0016614-T01-IM6	4	1	60	Female	Metastasis	NSCLC	PD-1/PD-L1	7.9
P-0020965-T01-IM6	4	1	60	Male	Metastasis	HNSC	PD-1/PD-L1	4.38857
P-0021848-T01-IM6	4	1	60	Male	Metastasis	BLCA	PD-1/PD-L1	5.26629
P-0024419-T01-IM6	4	0	60	Male	Metastasis	EGC	PD-1/PD-L1	0
P-0008765-T01-IM5	3	0	60	Male	Metastasis	NSCLC	PD-1/PD-L1	6.89
P-0010362-T01-IM5	3	1	60	Female	Primary	NSCLC	PD-1/PD-L1	2.95
P-0024205-T01-IM6	3	0	60	Male	Primary	EGC	PD-1/PD-L1	7.02172
P-0001871-T01-IM3	2	1	60	Female	Primary	BLCA	PD-1/PD-L1	5.57622
P-0006439-T01-IM5	2	0	60	Male	Primary	HNSC	PD-1/PD-L1	4.91895
P-0011071-T01-IM5	2	1	60	Male	Metastasis	CRC	PD-1/PD-L1	80.6707
P-0015445-T01-IM6	2	1	60	Female	Primary	BRCA	PD-1/PD-L1	2.63
P-0018960-T01-IM6	2	1	60	Female	Metastasis	Unknown	PD-1/PD-L1	10.5326
P-0015950-T01-IM6	1.2	1	60	Male	Metastasis	NSCLC	Combination	4.4
P-0028320-T01-IM6	1.2	1	60	Female	Metastasis	NSCLC	PD-1/PD-L1	16.7
P-0039629-T01-IM6	49.7039	0	60.1	Male	Primary	SKCM	PD-1/PD-L1	4.32349
P-0023055-T01-IM6	21.2171	0	60.2	Male	Metastasis	SKCM	PD-1/PD-L1	0.864698
P-0005673-T01-IM5	60	0	60.3	Male	Metastasis	SKCM	PD-1/PD-L1	10.7659
P-0025831-T01-IM6	12.3355	0	60.3	Female	Metastasis	SKCM	PD-1/PD-L1	12.1058
P-0003609-T01-IM5	60	0	60.4	Male	Metastasis	SKCM	PD-1/PD-L1	4.8936
P-0006796-T01-IM5	48.7171	1	60.5	Female	Metastasis	SKCM	PD-1/PD-L1	35.2339
P-0019557-T01-IM6	40.7566	0	60.6	Female	Metastasis	SKCM	PD-1/PD-L1	14.6999
P-0029475-T01-IM6	60	0	60.7	Female	Metastasis	SKCM	PD-1/PD-L1	16.4293
P-0019443-T01-IM6	36.6447	0	60.7	Female	Metastasis	SKCM	PD-1/PD-L1	11.2411
P-0021469-T01-IM6	33.3882	0	60.8	Male	Metastasis	SKCM	PD-1/PD-L1	2.59409
P-0017683-T01-IM6	19.7039	0	60.8	Male	Primary	SKCM	PD-1/PD-L1	45.829
P-0019490-T01-IM6	39.7697	0	60.9	Female	Metastasis	SKCM	PD-1/PD-L1	37.182
P-0025853-T01-IM6	38.0592	0	60.9	Male	Metastasis	SKCM	PD-1/PD-L1	6.05289
P-0000082-T01-IM3	57	0	61	Male	Primary	NSCLC	PD-1/PD-L1	1.12
P-0005981-T01-IM5	47	0	61	Male	Metastasis	NSCLC	PD-1/PD-L1	9.84
P-0001603-T01-IM3	40	0	61	Male	Metastasis	SKCM	CTLA-4	22.3
P-0000423-T01-IM3	39	0	61	Male	Primary	BLCA	PD-1/PD-L1	22.3049
P-0004813-T02-IM5	39	0	61	Male	Metastasis	RCC	PD-1/PD-L1	3.94
P-0003584-T01-IM5	36	1	61	Female	Primary	NSCLC	PD-1/PD-L1	10.82
P-0006343-T01-IM5	28	0	61	Female	Primary	NSCLC	PD-1/PD-L1	5.9
P-0005235-T01-IM5	27	1	61	Male	Metastasis	SKCM	Combination	0.98
P-0002794-T01-IM3	25	0	61	Female	Metastasis	NSCLC	PD-1/PD-L1	1.12
P-0003749-T01-IM5	24	0	61	Male	Primary	SKCM	Combination	4.92
P-0006222-T01-IM5	24	1	61	Female	Metastasis	RCC	PD-1/PD-L1	4.92
P-0003003-T01-IM3	22	0	61	Male	Metastasis	RCC	PD-1/PD-L1	4.46
P-0012519-T01-IM5	22	0	61	Male	Metastasis	RCC	PD-1/PD-L1	4.92
P-0003229-T01-IM5	21	1	61	Male	Metastasis	NSCLC	PD-1/PD-L1	49.19
P-0007119-T01-IM5	21	0	61	Male	Primary	NSCLC	PD-1/PD-L1	22.63
P-0009419-T01-IM5	20	0	61	Male	Metastasis	NSCLC	PD-1/PD-L1	11.81
P-0009660-T01-IM5	20	0	61	Male	Metastasis	NSCLC	PD-1/PD-L1	23.61
P-0012551-T01-IM5	20	0	61	Female	Metastasis	SKCM	CTLA-4	11.81
P-0013368-T01-IM5	20	0	61	Male	Primary	RCC	PD-1/PD-L1	1.97
P-0012968-T01-IM5	19	0	61	Male	Metastasis	SKCM	Combination	10.82
P-0005109-T01-IM5	18	0	61	Male	Metastasis	SKCM	Combination	17.71
P-0010088-T01-IM5	18	0	61	Male	Metastasis	HNSC	PD-1/PD-L1	12.7893
P-0015342-T01-IM6	18	0	61	Male	Primary	RCC	PD-1/PD-L1	2.63
P-0018820-T01-IM6	16.3	1	61	Female	Metastasis	NSCLC	PD-1/PD-L1	11.4
P-0014594-T01-IM6	16	0	61	Male	Primary	RCC	PD-1/PD-L1	2.63
P-0002794-T02-IM5	15.97	1	61	Female	Metastasis	NSCLC	PD-1/PD-L1	7.82976
P-0006570-T01-IM5	11	1	61	Male	Primary	BLCA	PD-1/PD-L1	2.95137
P-0012780-T01-IM5	11	1	61	Female	Metastasis	SKCM	Combination	6.89
P-0001646-T01-IM3	10	1	61	Female	Metastasis	SKCM	CTLA-4	1.12
P-0019034-T01-IM6	10	0	61	Female	Metastasis	Unknown	PD-1/PD-L1	0
P-0030323-T01-IM6	9.5	1	61	Male	Metastasis	NSCLC	PD-1/PD-L1	14.9
P-0006607-T01-IM5	9.4	1	61	Male	Metastasis	NSCLC	Combination	2
P-0004011-T01-IM5	9	0	61	Male	Metastasis	CRC	PD-1/PD-L1	64.9301
P-0011180-T01-IM5	7	0	61	Female	Primary	NSCLC	PD-1/PD-L1	1.97
P-0012728-T01-IM5	7	1	61	Female	Metastasis	CRC	PD-1/PD-L1	9.83789
P-0013861-T01-IM5	7	0	61	Male	Metastasis	BLCA	PD-1/PD-L1	2.95137
P-0013873-T01-IM5	7	1	61	Male	Primary	BLCA	PD-1/PD-L1	4.91895
P-0014815-T01-IM6	7	1	61	Female	Primary	BLCA	PD-1/PD-L1	6.144
P-0015344-T01-IM6	6	0	61	Male	Metastasis	BLCA	PD-1/PD-L1	58.8069
P-0004686-T01-IM5	5	1	61	Female	Primary	SKCM	PD-1/PD-L1	2.95
P-0002826-T01-IM3	4	1	61	Female	Metastasis	NSCLC	PD-1/PD-L1	14.5
P-0004054-T01-IM5	4	1	61	Male	Primary	NSCLC	PD-1/PD-L1	13.77
P-0018188-T01-IM6	4	1	61	Female	Metastasis	HNSC	PD-1/PD-L1	7.89943
P-0000249-T02-IM3	3	1	61	Male	Primary	EGC	PD-1/PD-L1	1.11524
P-0004099-T01-IM5	3	1	61	Male	Primary	NSCLC	PD-1/PD-L1	12.79
P-0005054-T01-IM5	3	0	61	Female	Primary	BLCA	PD-1/PD-L1	20.6596
P-0006282-T02-IM5	3	1	61	Male	Primary	RCC	PD-1/PD-L1	2.95
P-0010963-T01-IM5	3	1	61	Male	Metastasis	RCC	PD-1/PD-L1	0.98
P-0016782-T01-IM6	3	0	61	Female	Metastasis	NSCLC	PD-1/PD-L1	21.94
P-0022949-T01-IM6	2.7	1	61	Male	Metastasis	NSCLC	PD-1/PD-L1	8.8
P-0000444-T01-IM3	2	1	61	Male	Metastasis	EGC	PD-1/PD-L1	5.57622
P-0014159-T01-IM5	2	1	61	Male	Metastasis	SKCM	PD-1/PD-L1	19.68
P-0015967-T01-IM6	2	0	61	Male	Metastasis	Unknown	PD-1/PD-L1	3.51086
P-0025720-T01-IM6	2	0	61	Male	Metastasis	HNSC	PD-1/PD-L1	6.144
P-0014328-T01-IM6	1	1	61	Female	Metastasis	NSCLC	Combination	4.39
P-0016931-T01-IM6	1	0	61	Male	Metastasis	EGC	Combination	6.144
P-0025373-T01-IM6	1	0	61	Male	Metastasis	HNSC	PD-1/PD-L1	12.288
P-0017215-T01-IM5	60	0	61.1	Male	Metastasis	SKCM	PD-1/PD-L1	20.5531
P-0025813-T01-IM6	60	0	61.1	Male	Metastasis	SKCM	PD-1/PD-L1	18.1587
P-0015959-T01-IM6	60	0	61.1	Male	Metastasis	SKCM	PD-1/PD-L1	21.6175
P-0020638-T01-IM6	40.2961	0	61.1	Male	Metastasis	SKCM	PD-1/PD-L1	25.9409
P-0026314-T01-IM6	17.4342	0	61.1	Female	Primary	SKCM	PD-1/PD-L1	5.18819
P-0020817-T01-IM6	60	0	61.2	Male	Primary	SKCM	PD-1/PD-L1	94.2521
P-0017384-T01-IM6	60	0	61.2	Female	Primary	SKCM	PD-1/PD-L1	3.45879
P-0024344-T01-IM6	16.7434	0	61.2	Male	Primary	SKCM	PD-1/PD-L1	12.9705
P-0027154-T01-IM6	14.8026	0	61.2	Female	Metastasis	SKCM	PD-1/PD-L1	8.64698
P-0023041-T01-IM6	60	0	61.4	Male	Primary	SKCM	PD-1/PD-L1	58.7995
P-0021948-T01-IM6	60	0	61.4	Female	Primary	SKCM	PD-1/PD-L1	31.1291
P-0014392-T01-IM6	5.55921	1	61.4	Male	Primary	SKCM	PD-1/PD-L1	25.0762
P-0023973-T01-IM6	56.875	0	61.5	Female	Metastasis	SKCM	PD-1/PD-L1	23.3468
P-0027875-T01-IM6	12.5329	1	61.5	Male	Metastasis	SKCM	PD-1/PD-L1	8.64698
P-0038676-T01-IM6	3.71711	0	61.6	Female	Metastasis	SKCM	PD-1/PD-L1	0.864698
P-0027768-T01-IM6	60	0	61.7	Male	Metastasis	SKCM	PD-1/PD-L1	18.1587
P-0025973-T01-IM6	13.7829	0	61.7	Male	Primary	SKCM	PD-1/PD-L1	146.999
P-0033470-T01-IM6	9.47368	0	61.7	Female	Primary	SKCM	PD-1/PD-L1	14.6999
P-0038967-T01-IM6	2.56579	0	61.7	Male	Metastasis	SKCM	PD-1/PD-L1	6.91758
P-0031887-T01-IM6	18.2566	0	61.8	Female	Metastasis	SKCM	PD-1/PD-L1	12.1058
P-0019239-T01-IM6	8.45395	0	61.8	Male	Primary	SKCM	PD-1/PD-L1	6.91758
P-0029950-T01-IM6	7.53289	0	61.8	Male	Metastasis	SKCM	PD-1/PD-L1	12.9705
P-0030878-T01-IM6	60	0	61.9	Male	Metastasis	SKCM	PD-1/PD-L1	1.7294
P-0021440-T01-IM6	60	0	61.9	Male	Primary	SKCM	PD-1/PD-L1	4.32349
P-0013728-T01-IM5	46	0	62	Male	Metastasis	RCC	Combination	1.97
P-0003562-T01-IM5	45	0	62	Male	Primary	NSCLC	PD-1/PD-L1	36.4
P-0000063-T01-IM3	42	0	62	Male	Primary	BLCA	PD-1/PD-L1	16.7287
P-0004507-T01-IM5	42	0	62	Male	Primary	RCC	PD-1/PD-L1	3.94
P-0003524-T01-IM5	39	0	62	Male	Primary	BLCA	PD-1/PD-L1	42.3029
P-0006653-T01-IM5	36	1	62	Female	Primary	RCC	PD-1/PD-L1	4.92
P-0012783-T01-IM5	30	0	62	Male	Primary	SKCM	Combination	18.69
P-0003360-T01-IM5	29	0	62	Male	Primary	BG	Combination	3.94
P-0010312-T01-IM5	29	1	62	Male	Metastasis	HNSC	PD-1/PD-L1	0.983789
P-0004442-T01-IM5	26	0	62	Male	Primary	NSCLC	PD-1/PD-L1	34.43
P-0015644-T01-IM6	26	0	62	Female	Metastasis	BLCA	Combination	4.38857
P-0001232-T01-IM3	23	0	62	Male	Primary	RCC	PD-1/PD-L1	4.46
P-0006084-T01-IM5	21	1	62	Male	Primary	NSCLC	PD-1/PD-L1	6.89
P-0016918-T01-IM6	21	0	62	Male	Metastasis	Unknown	PD-1/PD-L1	12.288
P-0005965-T01-IM5	19	0	62	Female	Primary	RCC	PD-1/PD-L1	4.92
P-0012315-T01-IM5	18	0	62	Female	Metastasis	SKCM	PD-1/PD-L1	13.77
P-0000682-T01-IM3	17	0	62	Male	Metastasis	CRC	PD-1/PD-L1	13.3829
P-0020399-T01-IM6	15	0	62	Male	Metastasis	CRC	PD-1/PD-L1	61.44
P-0015591-T01-IM6	14	1	62	Male	Metastasis	HNSC	PD-1/PD-L1	0
P-0006971-T01-IM5	13	1	62	Male	Metastasis	SKCM	CTLA-4	1.97
P-0010603-T01-IM5	12	0	62	Male	Metastasis	RCC	PD-1/PD-L1	5.9
P-0014285-T02-IM6	12	1	62	Female	Metastasis	NSCLC	PD-1/PD-L1	3.5
P-0010614-T01-IM5	11	1	62	Female	Metastasis	SKCM	PD-1/PD-L1	1.97
P-0010921-T01-IM5	11	1	62	Male	Primary	BLCA	PD-1/PD-L1	47.2219
P-0011033-T01-IM5	11	1	62	Female	Metastasis	NSCLC	PD-1/PD-L1	2.95
P-0018782-T01-IM6	10	0	62	Male	Primary	EGC	Combination	1.75543
P-0019351-T01-IM6	10	0	62	Male	Primary	EGC	PD-1/PD-L1	5.26629
P-0020040-T01-IM6	10	1	62	Male	Primary	HNSC	PD-1/PD-L1	3.51086
P-0001268-T01-IM3	9	1	62	Male	Metastasis	BLCA	PD-1/PD-L1	4.46097
P-0010212-T01-IM5	9	0	62	Male	Primary	RCC	PD-1/PD-L1	3.94
P-0011068-T01-IM5	9	0	62	Male	Primary	CRC	PD-1/PD-L1	43.2867
P-0012102-T01-IM5	9	1	62	Male	Primary	RCC	PD-1/PD-L1	3.94
P-0006177-T01-IM5	8	1	62	Male	Metastasis	SKCM	PD-1/PD-L1	43.29
P-0004140-T01-IM5	7	1	62	Male	Metastasis	CRC	PD-1/PD-L1	10.8217
P-0022995-T01-IM6	7	1	62	Male	Primary	EGC	PD-1/PD-L1	6.144
P-0016481-T01-IM6	6	1	62	Male	Primary	NSCLC	PD-1/PD-L1	20.19
P-0022502-T01-IM6	6	0	62	Male	Metastasis	HNSC	PD-1/PD-L1	12.288
P-0001340-T01-IM3	5.33	1	62	Male	Metastasis	NSCLC	PD-1/PD-L1	6.65493
P-0016028-T01-IM6	5	0	62	Female	Metastasis	Unknown	PD-1/PD-L1	2.63314
P-0032182-T01-IM6	5	1	62	Female	Metastasis	NSCLC	PD-1/PD-L1	3.5
P-0002041-T01-IM3	4	1	62	Female	Metastasis	BRCA	PD-1/PD-L1	0
P-0026970-T01-IM6	4	0	62	Male	Metastasis	BLCA	PD-1/PD-L1	27.2092
P-0015771-T01-IM6	3.43	1	62	Male	Metastasis	NSCLC	Combination	1.7294
P-0000547-T01-IM3	3	1	62	Female	Metastasis	BRCA	PD-1/PD-L1	6.69
P-0001841-T01-IM3	3	1	62	Male	Metastasis	SKCM	Combination	8.92
P-0011546-T01-IM5	3	0	62	Female	Metastasis	NSCLC	PD-1/PD-L1	9.84
P-0019258-T01-IM6	3	1	62	Male	Metastasis	HNSC	PD-1/PD-L1	7.02172
P-0020846-T01-IM6	3	1	62	Male	Metastasis	HNSC	PD-1/PD-L1	5.26629
P-0023603-T01-IM6	3	1	62	Male	Primary	EGC	PD-1/PD-L1	7.89943
P-0024576-T01-IM6	3	0	62	Male	Primary	HNSC	PD-1/PD-L1	9.65486
P-0029298-T01-IM6	2.5	1	62	Male	Metastasis	NSCLC	PD-1/PD-L1	15.8
P-0020076-T02-IM6	2.2	1	62	Male	Metastasis	NSCLC	PD-1/PD-L1	3.5
P-0005947-T01-IM5	2	0	62	Female	Primary	BLCA	PD-1/PD-L1	28.5299
P-0010755-T01-IM5	2	1	62	Male	Metastasis	HNSC	PD-1/PD-L1	1.96758
P-0011440-T01-IM5	2	1	62	Male	Metastasis	BLCA	PD-1/PD-L1	27.5461
P-0019413-T01-IM6	2	0	62	Male	Primary	EGC	PD-1/PD-L1	7.02172
P-0025917-T02-IM6	1.7	1	62	Female	Metastasis	NSCLC	PD-1/PD-L1	30.7
P-0027742-T01-IM6	1.5	1	62	Female	Metastasis	NSCLC	PD-1/PD-L1	1.8
P-0023596-T01-IM6	1.4	1	62	Male	Metastasis	NSCLC	PD-1/PD-L1	6.1
P-0003914-T01-IM3	1	1	62	Male	Primary	EGC	PD-1/PD-L1	10.0372
P-0005500-T01-IM5	1	1	62	Male	Primary	EGC	CTLA-4	24.5947
P-0011508-T01-IM5	1	1	62	Male	Metastasis	NSCLC	PD-1/PD-L1	6.89
P-0018216-T01-IM6	1	0	62	Male	Primary	BLCA	PD-1/PD-L1	8.77715
P-0020714-T01-IM6	1	1	62	Female	Metastasis	Unknown	PD-1/PD-L1	3.51086
P-0026298-T01-IM6	1	0	62	Male	Metastasis	Unknown	PD-1/PD-L1	4.38857
P-0021995-T01-IM6	40.5263	0	62.1	Male	Metastasis	SKCM	PD-1/PD-L1	29.3997
P-0010848-T01-IM5	27.5329	1	62.1	Male	Metastasis	SKCM	PD-1/PD-L1	11.7446
P-0030209-T01-IM6	60	0	62.2	Male	Metastasis	SKCM	PD-1/PD-L1	25.9409
P-0027338-T01-IM6	31.875	0	62.2	Male	Metastasis	SKCM	PD-1/PD-L1	50.1525
P-0018132-T01-IM6	54.0789	0	62.3	Male	Metastasis	SKCM	PD-1/PD-L1	7.78228
P-0024072-T01-IM6	34.4737	0	62.3	Male	Metastasis	SKCM	PD-1/PD-L1	46.6937
P-0032800-T01-IM6	20.5263	0	62.3	Male	Metastasis	SKCM	PD-1/PD-L1	20.7528
P-0012865-T01-IM5	40.9539	0	62.4	Female	Metastasis	SKCM	PD-1/PD-L1	46.9785
P-0024769-T01-IM6	17.5658	0	62.6	Male	Primary	SKCM	PD-1/PD-L1	12.1058
P-0017635-T01-IM5	30.2961	0	62.7	Male	Metastasis	SKCM	PD-1/PD-L1	7.82976
P-0001901-T01-IM3	60	0	62.9	Female	Metastasis	SKCM	PD-1/PD-L1	16.6373
P-0019909-T02-IM6	11.9408	1	62.9	Male	Metastasis	SKCM	PD-1/PD-L1	10.3764
P-0004871-T01-IM5	44	0	63	Female	Primary	SKCM	CTLA-4	7.87
P-0006639-T01-IM5	44	0	63	Male	Primary	RCC	PD-1/PD-L1	2.95
P-0002255-T01-IM3	39	0	63	Female	Primary	RCC	PD-1/PD-L1	3.35
P-0005458-T01-IM5	36	0	63	Female	Primary	RCC	PD-1/PD-L1	3.94
P-0003698-T02-IM5	34	0	63	Male	Primary	BLCA	Combination	7.87031
P-0013845-T01-IM5	28	0	63	Male	Metastasis	SKCM	Combination	1.97
P-0006047-T02-IM5	24	0	63	Female	Metastasis	NSCLC	PD-1/PD-L1	1.97
P-0006381-T01-IM5	24	1	63	Male	Metastasis	RCC	PD-1/PD-L1	1.97
P-0007834-T01-IM5	23	0	63	Female	Metastasis	RCC	PD-1/PD-L1	6.89
P-0007961-T02-IM5	23	1	63	Male	Primary	RCC	PD-1/PD-L1	7.87
P-0002165-T01-IM3	22	0	63	Male	Metastasis	SKCM	Combination	2.23
P-0012516-T01-IM5	22	0	63	Male	Primary	RCC	PD-1/PD-L1	3.94
P-0006934-T01-IM5	20	0	63	Male	Primary	BLCA	PD-1/PD-L1	4.91895
P-0009364-T01-IM5	19	0	63	Female	Metastasis	BRCA	PD-1/PD-L1	27.55
P-0014006-T01-IM5	18	1	63	Male	Primary	BG	PD-1/PD-L1	1.97
P-0003283-T01-IM5	17	0	63	Male	Primary	RCC	PD-1/PD-L1	2.95
P-0014599-T01-IM6	17	0	63	Male	Primary	NSCLC	PD-1/PD-L1	14.92
P-0008522-T01-IM5	16	1	63	Female	Primary	RCC	PD-1/PD-L1	7.87
P-0006294-T01-IM5	15	1	63	Female	Primary	NSCLC	PD-1/PD-L1	3.94
P-0013204-T01-IM5	15	0	63	Male	Primary	BG	PD-1/PD-L1	4.92
P-0015348-T01-IM6	15	0	63	Male	Metastasis	NSCLC	PD-1/PD-L1	10.53
P-0014220-T01-IM6	14	0	63	Male	Primary	BG	PD-1/PD-L1	5.27
P-0016062-T01-IM6	14	0	63	Male	Primary	HNSC	PD-1/PD-L1	10.5326
P-0009161-T01-IM5	13	0	63	Female	Metastasis	NSCLC	PD-1/PD-L1	10.82
P-0000088-T01-IM3	12	1	63	Male	Metastasis	BLCA	PD-1/PD-L1	13.3829
P-0019717-T01-IM6	12	0	63	Male	Metastasis	BLCA	PD-1/PD-L1	14.9212
P-0002193-T01-IM3	11	1	63	Male	Metastasis	HNSC	PD-1/PD-L1	1.11524
P-0010587-T01-IM5	11	0	63	Female	Primary	CRC	PD-1/PD-L1	84.6059
P-0013232-T01-IM5	11	0	63	Male	Metastasis	SKCM	PD-1/PD-L1	48.21
P-0004472-T01-IM5	10	1	63	Female	Metastasis	NSCLC	PD-1/PD-L1	14.76
P-0007580-T01-IM5	10	1	63	Female	Primary	NSCLC	PD-1/PD-L1	2.95
P-0018683-T01-IM6	9	0	63	Female	Primary	EGC	PD-1/PD-L1	6.144
P-0023023-T01-IM6	8.4	1	63	Male	Metastasis	NSCLC	PD-1/PD-L1	7.9
P-0001052-T01-IM3	8	1	63	Female	Primary	BG	PD-1/PD-L1	5.58
P-0004561-T01-IM5	8	1	63	Male	Metastasis	RCC	PD-1/PD-L1	6.89
P-0020649-T01-IM6	8	0	63	Male	Metastasis	HNSC	PD-1/PD-L1	1.75543
P-0001843-T01-IM3	7	0	63	Female	Primary	BG	PD-1/PD-L1	5.58
P-0006008-T01-IM5	7	1	63	Male	Primary	HNSC	PD-1/PD-L1	9.83789
P-0010514-T01-IM5	6.9	1	63	Female	Metastasis	NSCLC	PD-1/PD-L1	4.9
P-0002787-T01-IM3	6	0	63	Male	Metastasis	HNSC	PD-1/PD-L1	5.57622
P-0003628-T01-IM5	5	1	63	Male	Primary	NSCLC	PD-1/PD-L1	12.79
P-0011246-T01-IM5	5	0	63	Female	Primary	RCC	Combination	2.95
P-0020995-T01-IM6	5	1	63	Male	Metastasis	BLCA	Combination	6.144
P-0006364-T01-IM5	4.33	1	63	Male	Metastasis	NSCLC	PD-1/PD-L1	4.8936
P-0001794-T01-IM3	4	1	63	Male	Metastasis	HNSC	PD-1/PD-L1	3.34573
P-0009363-T01-IM5	4	1	63	Female	Primary	CRC	PD-1/PD-L1	6.88652
P-0001223-T01-IM3	3	1	63	Male	Metastasis	BLCA	Combination	8.92195
P-0003157-T01-IM5	3	1	63	Male	Primary	NSCLC	PD-1/PD-L1	5.9
P-0008851-T01-IM5	3	1	63	Male	Primary	NSCLC	PD-1/PD-L1	7.87
P-0009505-T01-IM5	3	1	63	Female	Metastasis	NSCLC	PD-1/PD-L1	2.95
P-0012883-T01-IM5	3	0	63	Male	Primary	HNSC	PD-1/PD-L1	15.7406
P-0016314-T01-IM6	3	1	63	Female	Primary	CRC	PD-1/PD-L1	112.348
P-0009952-T01-IM5	2.1	1	63	Male	Metastasis	NSCLC	PD-1/PD-L1	1
P-0002758-T01-IM3	2	1	63	Male	Primary	NSCLC	PD-1/PD-L1	34.57
P-0004759-T01-IM5	2	1	63	Female	Primary	NSCLC	PD-1/PD-L1	1.97
P-0022377-T01-IM6	1.9	1	63	Male	Metastasis	NSCLC	PD-1/PD-L1	1.8
P-0012056-T02-IM6	1.3	1	63	Male	Metastasis	NSCLC	PD-1/PD-L1	10.5
P-0020755-T01-IM6	1.3	1	63	Female	Metastasis	NSCLC	PD-1/PD-L1	6.1
P-0018599-T01-IM6	1.2	1	63	Male	Metastasis	NSCLC	PD-1/PD-L1	38.6
P-0014736-T01-IM6	1	1	63	Male	Metastasis	NSCLC	PD-1/PD-L1	5.27
P-0022177-T01-IM6	52.5	0	63.2	Male	Metastasis	SKCM	PD-1/PD-L1	7.78228
P-0034234-T01-IM6	11.4803	0	63.2	Male	Metastasis	SKCM	PD-1/PD-L1	15.5646
P-0019379-T01-IM6	58.7829	1	63.3	Male	Metastasis	SKCM	PD-1/PD-L1	19.0234
P-0022232-T01-IM6	21.3158	0	63.3	Female	Metastasis	SKCM	PD-1/PD-L1	12.9705
P-0017512-T01-IM6	60	0	63.4	Male	Metastasis	SKCM	PD-1/PD-L1	19.0234
P-0023993-T01-IM6	55.1645	0	63.4	Male	Metastasis	SKCM	PD-1/PD-L1	3.45879
P-0015895-T01-IM6	5.92105	1	63.4	Male	Metastasis	SKCM	PD-1/PD-L1	13.8352
P-0022670-T01-IM6	18.9474	1	63.5	Male	Primary	SKCM	PD-1/PD-L1	3.45879
P-0035784-T01-IM6	60	0	63.6	Male	Metastasis	SKCM	PD-1/PD-L1	54.476
P-0018233-T01-IM6	52.0395	0	63.6	Male	Metastasis	SKCM	PD-1/PD-L1	9.51168
P-0018819-T01-IM6	50.6908	0	63.7	Male	Metastasis	SKCM	PD-1/PD-L1	6.05289
P-0031286-T01-IM6	15.1974	0	63.7	Male	Metastasis	SKCM	PD-1/PD-L1	31.1291
P-0032398-T01-IM6	60	0	63.8	Female	Metastasis	SKCM	PD-1/PD-L1	26.8056
P-0036733-T01-IM6	60	0	63.8	Male	Metastasis	SKCM	PD-1/PD-L1	66.5818
P-0034168-T01-IM6	34.8355	0	63.8	Male	Metastasis	SKCM	PD-1/PD-L1	4.32349
P-0027716-T01-IM6	60	0	63.9	Male	Metastasis	SKCM	PD-1/PD-L1	22.4822
P-0006762-T02-IM5	60	0	64	Female	Metastasis	RCC	PD-1/PD-L1	3.94
P-0017176-T01-IM6	50.7895	0	64	Male	Metastasis	SKCM	PD-1/PD-L1	13.8352
P-0005271-T01-IM5	50	1	64	Male	Metastasis	RCC	PD-1/PD-L1	7.87
P-0016347-T01-IM6	44.1776	0	64	Male	Metastasis	SKCM	PD-1/PD-L1	25.0762
P-0001710-T01-IM3	40	0	64	Male	Metastasis	SKCM	CTLA-4	17.84
P-0005144-T01-IM5	40	1	64	Male	Metastasis	SKCM	CTLA-4	6.89
P-0009319-T01-IM5	35	0	64	Male	Metastasis	NSCLC	Combination	1.97
P-0008399-T01-IM5	34	1	64	Female	Metastasis	RCC	Combination	4.92
P-0006663-T01-IM5	30.8	0	64	Female	Metastasis	NSCLC	PD-1/PD-L1	18.7
P-0003703-T01-IM5	30	1	64	Female	Primary	SKCM	CTLA-4	0.98
P-0006845-T01-IM5	29	0	64	Male	Metastasis	SKCM	PD-1/PD-L1	4.92
P-0007061-T01-IM5	28	0	64	Female	Metastasis	SKCM	Combination	1.97
P-0007421-T01-IM5	27	0	64	Male	Primary	BLCA	PD-1/PD-L1	1.96758
P-0021834-T01-IM6	27	0	64	Male	Primary	CRC	PD-1/PD-L1	6.144
P-0002731-T02-IM5	25	0	64	Female	Metastasis	NSCLC	PD-1/PD-L1	9.84
P-0010236-T01-IM5	25	0	64	Male	Metastasis	BLCA	Combination	13.773
P-0003377-T01-IM5	23	0	64	Male	Primary	BLCA	PD-1/PD-L1	13.773
P-0009736-T01-IM5	23	0	64	Male	Metastasis	SKCM	Combination	13.77
P-0006416-T01-IM5	22	1	64	Male	Primary	BG	PD-1/PD-L1	2.95
P-0011523-T01-IM5	21	0	64	Female	Primary	BLCA	PD-1/PD-L1	5.90273
P-0006045-T01-IM5	20	1	64	Female	Primary	BG	PD-1/PD-L1	2.95
P-0008166-T01-IM5	16	1	64	Male	Primary	BG	PD-1/PD-L1	3.94
P-0005842-T01-IM5	15	0	64	Male	Metastasis	BLCA	PD-1/PD-L1	40.3354
P-0013765-T01-IM5	15	0	64	Male	Primary	SKCM	Combination	7.87
P-0032455-T01-IM6	14.8	0	64	Female	Metastasis	NSCLC	PD-1/PD-L1	13.2
P-0012279-T01-IM5	14	1	64	Male	Metastasis	RCC	PD-1/PD-L1	8.85
P-0015603-T01-IM6	14	0	64	Male	Primary	BG	PD-1/PD-L1	4.39
P-0013923-T01-IM5	13	0	64	Female	Metastasis	Unknown	PD-1/PD-L1	17.7082
P-0012249-T01-IM5	12	0	64	Female	Metastasis	CRC	PD-1/PD-L1	37.384
P-0006586-T01-IM5	11	1	64	Male	Primary	RCC	PD-1/PD-L1	3.94
P-0010800-T01-IM5	10	1	64	Female	Metastasis	BRCA	CTLA-4	3.94
P-0001855-T01-IM3	9	0	64	Male	Metastasis	EGC	Combination	4.46097
P-0020122-T01-IM6	9	0	64	Female	Primary	BLCA	PD-1/PD-L1	22.8206
P-0000222-T01-IM3	8	1	64	Male	Primary	BLCA	PD-1/PD-L1	16.7287
P-0009453-T01-IM5	7	1	64	Female	Primary	BG	PD-1/PD-L1	3.94
P-0017370-T01-IM6	6	0	64	Male	Primary	EGC	PD-1/PD-L1	37.7417
P-0018563-T01-IM6	6	1	64	Female	Metastasis	Unknown	PD-1/PD-L1	16.6766
P-0025174-T01-IM6	6	0	64	Female	Primary	BLCA	PD-1/PD-L1	4.38857
P-0031112-T02-IM6	5.7	1	64	Female	Metastasis	NSCLC	PD-1/PD-L1	7
P-0021993-T01-IM6	5	0	64	Female	Primary	EGC	PD-1/PD-L1	4.38857
P-0011245-T01-IM5	4	1	64	Male	Primary	BLCA	PD-1/PD-L1	1.96758
P-0024530-T01-IM6	4	0	64	Male	Primary	EGC	PD-1/PD-L1	6.144
P-0000826-T01-IM3	3.8	1	64	Male	Metastasis	NSCLC	Combination	4.43662
P-0001144-T01-IM3	2	1	64	Male	Primary	NSCLC	PD-1/PD-L1	6.69
P-0024980-T03-IM6	2	1	64	Female	Metastasis	NSCLC	PD-1/PD-L1	0
P-0018979-T01-IM6	1.4	1	64	Female	Metastasis	NSCLC	PD-1/PD-L1	2.6
P-0033892-T01-IM6	1.4	1	64	Female	Metastasis	NSCLC	PD-1/PD-L1	10.5
P-0006339-T01-IM5	1	0	64	Female	Metastasis	SKCM	PD-1/PD-L1	64.93
P-0021507-T01-IM6	1	1	64	Male	Metastasis	Unknown	PD-1/PD-L1	8.77715
P-0023408-T01-IM6	1	1	64	Female	Metastasis	NSCLC	PD-1/PD-L1	9.7
P-0017048-T01-IM6	0.4	1	64	Female	Metastasis	NSCLC	PD-1/PD-L1	6.1
P-0019720-T01-IM6	60	0	64.1	Male	Metastasis	SKCM	PD-1/PD-L1	35.4526
P-0011269-T01-IM5	54.5724	0	64.5	Male	Primary	SKCM	PD-1/PD-L1	28.3829
P-0034370-T01-IM6	60	0	64.6	Female	Metastasis	SKCM	PD-1/PD-L1	12.9705
P-0033965-T01-IM6	44.4408	1	64.6	Male	Metastasis	SKCM	PD-1/PD-L1	15.5646
P-0018031-T01-IM6	60	0	64.7	Male	Metastasis	SKCM	PD-1/PD-L1	11.2411
P-0020913-T01-IM6	38.8816	0	64.7	Male	Metastasis	SKCM	PD-1/PD-L1	19.8881
P-0035910-T01-IM6	19.8355	0	64.7	Male	Metastasis	SKCM	PD-1/PD-L1	95.9815
P-0028477-T01-IM6	60	0	64.8	Male	Metastasis	SKCM	PD-1/PD-L1	66.5818
P-0015694-T01-IM6	11.3487	1	64.8	Female	Metastasis	SKCM	PD-1/PD-L1	15.5646
P-0013356-T01-IM5	50.0329	0	64.9	Male	Metastasis	SKCM	PD-1/PD-L1	29.3616
P-0025164-T01-IM6	41.7105	0	64.9	Male	Metastasis	SKCM	PD-1/PD-L1	35.4526
P-0009412-T01-IM5	60	0	65	Male	Metastasis	SKCM	PD-1/PD-L1	1.95744
P-0001773-T01-IM3	60	0	65	Male	Metastasis	SKCM	PD-1/PD-L1	15.5282
P-0015791-T01-IM6	58	1	65	Male	Metastasis	SKCM	PD-1/PD-L1	7.9
P-0001560-T01-IM3	43	0	65	Male	Metastasis	SKCM	CTLA-4	25.65
P-0001093-T01-IM3	42	0	65	Male	Metastasis	NSCLC	Combination	12.27
P-0003757-T01-IM5	35	0	65	Male	Metastasis	SKCM	Combination	9.84
P-0022885-T01-IM6	34.5395	0	65	Female	Metastasis	SKCM	PD-1/PD-L1	12.1058
P-0002028-T01-IM3	33	0	65	Female	Primary	NSCLC	PD-1/PD-L1	6.69
P-0005352-T01-IM5	30	0	65	Female	Metastasis	SKCM	Combination	10.82
P-0002914-T01-IM3	24	1	65	Male	Metastasis	SKCM	Combination	25.65
P-0008786-T01-IM5	24	0	65	Male	Metastasis	NSCLC	PD-1/PD-L1	4.92
P-0008772-T01-IM5	21	0	65	Male	Primary	RCC	PD-1/PD-L1	3.94
P-0044186-T01-IM6	19.4	0	65	Male	Metastasis	NSCLC	PD-1/PD-L1	12.3
P-0006628-T01-IM5	19	0	65	Male	Primary	BLCA	PD-1/PD-L1	4.91895
P-0006895-T01-IM5	19	0	65	Male	Metastasis	NSCLC	PD-1/PD-L1	36.4
P-0014529-T01-IM6	16	0	65	Female	Primary	NSCLC	PD-1/PD-L1	21.07
P-0000302-T01-IM3	15	0	65	Male	Metastasis	NSCLC	PD-1/PD-L1	1.12
P-0028723-T01-IM6	14.9	0	65	Male	Metastasis	NSCLC	PD-1/PD-L1	11.4
P-0001170-T01-IM3	13	1	65	Male	Primary	CRC	PD-1/PD-L1	8.92195
P-0002864-T01-IM3	13	1	65	Male	Primary	RCC	Combination	3.35
P-0018568-T01-IM6	12	0	65	Female	Metastasis	EGC	PD-1/PD-L1	5.26629
P-0029975-T01-IM6	11.4	1	65	Male	Metastasis	NSCLC	PD-1/PD-L1	5.3
P-0007407-T01-IM5	11	1	65	Male	Primary	HNSC	PD-1/PD-L1	12.7893
P-0008442-T01-IM5	11	1	65	Female	Metastasis	NSCLC	PD-1/PD-L1	4.92
P-0009426-T01-IM5	11	1	65	Female	Metastasis	NSCLC	PD-1/PD-L1	10.82
P-0021833-T01-IM6	10.1	1	65	Female	Metastasis	NSCLC	PD-1/PD-L1	14
P-0020489-T01-IM6	9	1	65	Male	Metastasis	Unknown	PD-1/PD-L1	8.77715
P-0021484-T01-IM6	9	0	65	Male	Primary	BLCA	PD-1/PD-L1	14.0434
P-0020643-T01-IM6	9	1	65	Female	Metastasis	NSCLC	PD-1/PD-L1	16.7
P-0008659-T01-IM5	8	1	65	Male	Metastasis	SKCM	PD-1/PD-L1	8.85
P-0014451-T01-IM6	8	1	65	Female	Primary	NSCLC	PD-1/PD-L1	9.65
P-0020835-T01-IM6	8	0	65	Male	Primary	BLCA	PD-1/PD-L1	7.89943
P-0002429-T01-IM3	7	1	65	Male	Primary	SKCM	CTLA-4	4.46
P-0016149-T01-IM6	7	0	65	Male	Primary	BLCA	Combination	16.6766
P-0021915-T01-IM6	7	1	65	Male	Metastasis	HNSC	PD-1/PD-L1	7.02172
P-0004056-T01-IM5	6	1	65	Male	Primary	BLCA	PD-1/PD-L1	14.7568
P-0006095-T01-IM5	6	1	65	Male	Primary	RCC	PD-1/PD-L1	5.9
P-0007068-T01-IM5	6	1	65	Male	Metastasis	NSCLC	PD-1/PD-L1	8.85
P-0014786-T01-IM6	6	1	65	Female	Primary	NSCLC	PD-1/PD-L1	11.41
P-0021255-T01-IM6	5	0	65	Male	Metastasis	BLCA	PD-1/PD-L1	15.7989
P-0001437-T01-IM3	4	1	65	Female	Primary	NSCLC	PD-1/PD-L1	1.12
P-0007575-T01-IM5	4	1	65	Male	Metastasis	HNSC	PD-1/PD-L1	5.90273
P-0001406-T01-IM3	3	1	65	Female	Primary	BG	PD-1/PD-L1	3.35
P-0000977-T01-IM3	2	1	65	Male	Primary	EGC	Combination	7.80671
P-0007525-T01-IM5	2	1	65	Female	Metastasis	NSCLC	PD-1/PD-L1	3.94
P-0010499-T01-IM5	2	1	65	Male	Primary	CRC	PD-1/PD-L1	153.471
P-0008442-T02-IM5	1.4	1	65	Female	Metastasis	NSCLC	PD-1/PD-L1	12.7234
P-0027576-T01-IM6	0.8	1	65	Male	Metastasis	NSCLC	PD-1/PD-L1	4.4
P-0032570-T01-IM6	60	0	65.1	Male	Metastasis	SKCM	PD-1/PD-L1	45.829
P-0020691-T01-IM6	19.9013	1	65.1	Female	Metastasis	SKCM	PD-1/PD-L1	2.59409
P-0028067-T01-IM6	41.875	0	65.4	Female	Metastasis	SKCM	PD-1/PD-L1	6.05289
P-0028910-T01-IM6	39.7039	0	65.4	Male	Metastasis	SKCM	PD-1/PD-L1	29.3997
P-0015881-T03-IM6	38.6184	0	65.4	Male	Primary	SKCM	PD-1/PD-L1	20.7528
P-0001251-T01-IM3	15.625	1	65.5	Female	Metastasis	SKCM	PD-1/PD-L1	80.9683
P-0020127-T01-IM6	60	0	65.6	Male	Metastasis	SKCM	PD-1/PD-L1	16.4293
P-0022680-T01-IM6	14.0789	1	65.8	Male	Metastasis	SKCM	PD-1/PD-L1	35.4526
P-0021968-T01-IM6	39.8355	0	65.9	Male	Primary	SKCM	PD-1/PD-L1	34.5879
P-0007986-T01-IM5	18.9145	0	65.9	Female	Primary	SKCM	PD-1/PD-L1	5.87232
P-0021842-T01-IM6	60	0	66	Male	Metastasis	SKCM	PD-1/PD-L1	14.6999
P-0005733-T01-IM5	44	1	66	Female	Metastasis	SKCM	CTLA-4	17.71
P-0000071-T01-IM3	43	0	66	Male	Primary	BLCA	PD-1/PD-L1	11.1524
P-0005958-T01-IM5	39	0	66	Male	Primary	RCC	Combination	3.94
P-0009105-T01-IM5	39	0	66	Female	Metastasis	SKCM	CTLA-4	33.45
P-0005437-T01-IM5	37	0	66	Female	Primary	RCC	PD-1/PD-L1	0
P-0005823-T01-IM5	29	0	66	Male	Metastasis	CRC	PD-1/PD-L1	89.5248
P-0007399-T01-IM5	28	0	66	Male	Primary	RCC	Combination	2.95
P-0010249-T01-IM5	28	0	66	Male	Metastasis	SKCM	CTLA-4	19.68
P-0015983-T01-IM6	23	0	66	Female	Primary	RCC	PD-1/PD-L1	5.27
P-0012107-T01-IM5	21	0	66	Male	Metastasis	HNSC	PD-1/PD-L1	11.8055
P-0004492-T01-IM5	20	1	66	Male	Metastasis	HNSC	PD-1/PD-L1	2.95137
P-0005332-T01-IM5	20	1	66	Female	Primary	RCC	PD-1/PD-L1	3.94
P-0005682-T01-IM5	20	1	66	Male	Metastasis	RCC	PD-1/PD-L1	3.94
P-0009435-T01-IM5	20	0	66	Female	Primary	SKCM	PD-1/PD-L1	0.98
P-0011119-T01-IM5	20	1	66	Female	Primary	BG	PD-1/PD-L1	1.97
P-0015407-T01-IM6	20	0	66	Male	Metastasis	SKCM	Combination	35.11
P-0037606-T02-IM6	19.4408	0	66	Female	Metastasis	SKCM	PD-1/PD-L1	34.5879
P-0028101-T01-IM6	17.9934	0	66	Male	Metastasis	SKCM	PD-1/PD-L1	39.7761
P-0014966-T01-IM6	17	0	66	Male	Metastasis	SKCM	PD-1/PD-L1	6.14
P-0006768-T01-IM5	16	0	66	Male	Primary	NSCLC	PD-1/PD-L1	7.87
P-0009202-T01-IM5	15	0	66	Male	Primary	HNSC	PD-1/PD-L1	11.8055
P-0015612-T01-IM6	15	0	66	Female	Metastasis	SKCM	Combination	21.07
P-0005752-T01-IM5	14	1	66	Male	Metastasis	NSCLC	PD-1/PD-L1	3.94
P-0009074-T01-IM5	14	1	66	Female	Metastasis	SKCM	Combination	2.95
P-0016624-T01-IM6	14	0	66	Male	Metastasis	BLCA	PD-1/PD-L1	11.4103
P-0009959-T01-IM5	13	1	66	Male	Primary	NSCLC	PD-1/PD-L1	2.95
P-0006026-T01-IM5	12	0	66	Male	Metastasis	EGC	PD-1/PD-L1	6.88652
P-0017717-T01-IM6	12	0	66	Male	Primary	HNSC	PD-1/PD-L1	4.38857
P-0017702-T01-IM6	11.7105	0	66	Male	Metastasis	SKCM	PD-1/PD-L1	31.9938
P-0008187-T01-IM5	11	0	66	Male	Primary	EGC	PD-1/PD-L1	5.90273
P-0028631-T01-IM6	10.8882	1	66	Female	Metastasis	SKCM	PD-1/PD-L1	32.8585
P-0018197-T01-IM6	10.5	1	66	Male	Metastasis	NSCLC	PD-1/PD-L1	48.3
P-0008257-T01-IM5	10	1	66	Male	Primary	BG	PD-1/PD-L1	7.87
P-0027726-T01-IM6	9.7	1	66	Female	Metastasis	NSCLC	PD-1/PD-L1	20.2
P-0020252-T01-IM6	9	0	66	Female	Metastasis	CRC	PD-1/PD-L1	64.9509
P-0026552-T02-IM6	8.4	1	66	Female	Metastasis	NSCLC	PD-1/PD-L1	5.3
P-0008033-T01-IM5	8	1	66	Male	Metastasis	HNSC	PD-1/PD-L1	3.93516
P-0006674-T01-IM5	7	1	66	Female	Metastasis	NSCLC	PD-1/PD-L1	16.72
P-0014060-T01-IM5	7	0	66	Female	Metastasis	HNSC	PD-1/PD-L1	5.90273
P-0030125-T01-IM6	6.4	1	66	Female	Metastasis	NSCLC	PD-1/PD-L1	0.9
P-0002766-T01-IM3	6	1	66	Female	Primary	NSCLC	PD-1/PD-L1	5.58
P-0014071-T01-IM5	6	1	66	Male	Primary	BG	PD-1/PD-L1	5.9
P-0015251-T01-IM6	6	1	66	Male	Metastasis	EGC	Combination	8.77715
P-0017766-T01-IM6	6	0	66	Male	Metastasis	CRC	Combination	7.89943
P-0021471-T01-IM6	6	0	66	Female	Primary	BLCA	PD-1/PD-L1	6.144
P-0000458-T01-IM3	5	1	66	Male	Primary	NSCLC	PD-1/PD-L1	1.12
P-0008528-T01-IM5	5	1	66	Male	Metastasis	HNSC	Combination	8.8541
P-0012040-T01-IM5	5	1	66	Male	Primary	RCC	PD-1/PD-L1	3.94
P-0015415-T01-IM6	5	1	66	Male	Metastasis	SKCM	Combination	79.87
P-0006768-T02-IM5	4.27	1	66	Male	Metastasis	NSCLC	PD-1/PD-L1	12.7234
P-0020770-T01-IM6	4	0	66	Male	Metastasis	Unknown	Combination	5.26629
P-0017735-T01-IM6	3.9	1	66	Male	Metastasis	NSCLC	PD-1/PD-L1	10.5
P-0017208-T01-IM6	3	1	66	Male	Primary	BLCA	PD-1/PD-L1	17.5543
P-0020109-T01-IM6	3	1	66	Male	Primary	EGC	PD-1/PD-L1	6.144
P-0017253-T01-IM6	2.1	1	66	Male	Metastasis	NSCLC	PD-1/PD-L1	14
P-0006525-T01-IM5	2	1	66	Female	Metastasis	HNSC	PD-1/PD-L1	3.93516
P-0010669-T01-IM5	2	0	66	Female	Primary	BRCA	CTLA-4	3.94
P-0014182-T01-IM6	2	0	66	Male	Primary	CRC	PD-1/PD-L1	7.89943
P-0021442-T01-IM6	1.8	1	66	Female	Metastasis	NSCLC	PD-1/PD-L1	10.5
P-0000299-T01-IM3	1.63	1	66	Male	Metastasis	NSCLC	Combination	7.76409
P-0006528-T01-IM5	1	1	66	Female	Metastasis	Unknown	PD-1/PD-L1	6.88652
P-0011453-T01-IM5	1	1	66	Male	Primary	NSCLC	PD-1/PD-L1	5.9
P-0018931-T01-IM6	1	0	66	Female	Metastasis	Unknown	Combination	4.38857
P-0020192-T01-IM6	0.4	1	66	Female	Metastasis	NSCLC	PD-1/PD-L1	9.7
P-0021223-T01-IM6	20.5263	0	66.2	Female	Metastasis	SKCM	PD-1/PD-L1	38.9114
P-0030388-T01-IM6	60	0	66.4	Female	Metastasis	SKCM	PD-1/PD-L1	0.864698
P-0006621-T01-IM5	51.4145	0	66.8	Male	Primary	SKCM	PD-1/PD-L1	74.3827
P-0010726-T01-IM5	48.5855	0	66.8	Male	Metastasis	SKCM	PD-1/PD-L1	92.9784
P-0038372-T01-IM6	60	0	67	Male	Metastasis	SKCM	PD-1/PD-L1	30.2644
P-0005593-T01-IM5	59	0	67	Male	Metastasis	RCC	PD-1/PD-L1	0.98
P-0003560-T01-IM5	41	0	67	Male	Metastasis	SKCM	CTLA-4	46.24
P-0002715-T01-IM3	40	0	67	Male	Primary	BLCA	PD-1/PD-L1	16.7287
P-0003869-T01-IM5	40	0	67	Female	Primary	NSCLC	PD-1/PD-L1	55.09
P-0004518-T01-IM5	38	0	67	Female	Metastasis	SKCM	CTLA-4	25.58
P-0004142-T01-IM5	35	0	67	Female	Metastasis	SKCM	CTLA-4	23.61
P-0000895-T01-IM3	33	1	67	Male	Metastasis	SKCM	Combination	7.81
P-0015556-T01-IM6	30	0	67	Male	Metastasis	NSCLC	PD-1/PD-L1	4.39
P-0015513-T01-IM6	29.7039	0	67	Male	Metastasis	SKCM	PD-1/PD-L1	5.18819
P-0008322-T01-IM5	29	0	67	Male	Primary	NSCLC	PD-1/PD-L1	2.95
P-0000681-T01-IM3	28	0	67	Female	Metastasis	NSCLC	PD-1/PD-L1	18.96
P-0002504-T01-IM3	28	1	67	Male	Metastasis	SKCM	CTLA-4	37.92
P-0003881-T01-IM5	26	0	67	Male	Metastasis	SKCM	Combination	4.92
P-0007123-T01-IM5	24	0	67	Female	Metastasis	NSCLC	PD-1/PD-L1	8.85
P-0008490-T01-IM5	24	0	67	Female	Metastasis	SKCM	PD-1/PD-L1	5.9
P-0010927-T03-IM6	24	0	67	Female	Metastasis	NSCLC	PD-1/PD-L1	4.4
P-0011418-T01-IM5	22	0	67	Male	Metastasis	RCC	PD-1/PD-L1	3.94
P-0014648-T01-IM6	21	0	67	Male	Primary	BLCA	PD-1/PD-L1	6.144
P-0015648-T01-IM6	20	0	67	Male	Primary	NSCLC	PD-1/PD-L1	4.39
P-0014015-T01-IM5	19	0	67	Male	Metastasis	HNSC	PD-1/PD-L1	10.8217
P-0009119-T01-IM5	18	1	67	Male	Primary	BG	PD-1/PD-L1	7.87
P-0013318-T01-IM5	18	0	67	Male	Metastasis	SKCM	PD-1/PD-L1	7.87
P-0000762-T01-IM3	17	1	67	Male	Metastasis	CRC	PD-1/PD-L1	4.46097
P-0007220-T01-IM5	15	0	67	Male	Metastasis	HNSC	PD-1/PD-L1	10.8217
P-0010715-T01-IM5	15	0	67	Male	Primary	NSCLC	Combination	50.17
P-0002483-T01-IM3	14	1	67	Female	Metastasis	RCC	PD-1/PD-L1	6.69
P-0006642-T01-IM5	14	1	67	Female	Metastasis	NSCLC	PD-1/PD-L1	20.66
P-0015989-T01-IM6	14	0	67	Male	Metastasis	SKCM	PD-1/PD-L1	2.63
P-0016531-T01-IM6	14	0	67	Male	Primary	SKCM	Combination	3.51
P-0002444-T01-IM3	13	1	67	Male	Metastasis	NSCLC	PD-1/PD-L1	16.73
P-0011219-T01-IM5	13	1	67	Male	Primary	BG	PD-1/PD-L1	4.92
P-0013274-T01-IM5	13	1	67	Male	Metastasis	SKCM	PD-1/PD-L1	7.87
P-0025465-T01-IM6	12.7	1	67	Male	Metastasis	NSCLC	PD-1/PD-L1	1.8
P-0002639-T01-IM3	11	0	67	Female	Primary	NSCLC	PD-1/PD-L1	12.27
P-0005464-T01-IM5	11	1	67	Female	Primary	NSCLC	PD-1/PD-L1	6.89
P-0007543-T01-IM5	11	0	67	Male	Metastasis	HNSC	PD-1/PD-L1	3.93516
P-0008575-T01-IM5	11	1	67	Male	Metastasis	BLCA	PD-1/PD-L1	2.95137
P-0014449-T01-IM6	11	1	67	Male	Metastasis	SKCM	Combination	1.76
P-0000940-T01-IM3	10	1	67	Female	Metastasis	CRC	PD-1/PD-L1	10.0372
P-0006773-T01-IM5	9	1	67	Female	Primary	SKCM	PD-1/PD-L1	4.92
P-0013089-T01-IM5	9	1	67	Female	Primary	RCC	PD-1/PD-L1	5.9
P-0019648-T01-IM6	9	0	67	Male	Metastasis	Unknown	PD-1/PD-L1	0.877715
P-0020156-T01-IM6	8	0	67	Female	Metastasis	HNSC	PD-1/PD-L1	18.432
P-0003132-T01-IM5	7	1	67	Female	Metastasis	NSCLC	PD-1/PD-L1	33.45
P-0012427-T01-IM5	7	1	67	Male	Primary	NSCLC	PD-1/PD-L1	5.9
P-0002160-T01-IM3	6	1	67	Male	Metastasis	NSCLC	PD-1/PD-L1	13.38
P-0002551-T01-IM3	6	0	67	Female	Primary	NSCLC	PD-1/PD-L1	17.84
P-0015984-T01-IM6	6	1	67	Female	Metastasis	NSCLC	PD-1/PD-L1	24.58
P-0028712-T01-IM6	5.2	1	67	Female	Metastasis	NSCLC	PD-1/PD-L1	20.2
P-0000302-T02-IM6	4.93	0	67	Male	Metastasis	NSCLC	PD-1/PD-L1	6.05289
P-0003596-T01-IM5	4	1	67	Male	Primary	BLCA	PD-1/PD-L1	12.7893
P-0014909-T01-IM6	4	1	67	Male	Primary	BLCA	PD-1/PD-L1	6.144
P-0024054-T01-IM6	4	0	67	Male	Metastasis	EGC	PD-1/PD-L1	8.77715
P-0023598-T01-IM6	3.6	1	67	Female	Metastasis	NSCLC	PD-1/PD-L1	14.9
P-0006954-T01-IM5	3	1	67	Female	Primary	NSCLC	PD-1/PD-L1	7.87
P-0020422-T01-IM6	3	1	67	Female	Metastasis	Unknown	PD-1/PD-L1	27.2092
P-0026282-T01-IM6	3	0	67	Male	Primary	HNSC	PD-1/PD-L1	2.63314
P-0017437-T01-IM6	2.4	1	67	Female	Metastasis	NSCLC	PD-1/PD-L1	2.6
P-0017106-T01-IM6	2.2	1	67	Female	Metastasis	NSCLC	PD-1/PD-L1	8.8
P-0010008-T01-IM5	2	1	67	Male	Metastasis	SKCM	Combination	5.9
P-0012849-T01-IM5	2	1	67	Male	Metastasis	NSCLC	PD-1/PD-L1	9.84
P-0014402-T01-IM6	2	1	67	Female	Primary	BLCA	PD-1/PD-L1	8.77715
P-0020146-T01-IM6	2	1	67	Female	Primary	HNSC	PD-1/PD-L1	11.4103
P-0022001-T01-IM6	2	0	67	Female	Metastasis	Unknown	PD-1/PD-L1	2.63314
P-0004476-T01-IM5	1.3	1	67	Female	Metastasis	NSCLC	PD-1/PD-L1	6.9
P-0008406-T01-IM5	1.17	1	67	Female	Metastasis	NSCLC	PD-1/PD-L1	24.468
P-0000165-T01-IM3	1	1	67	Female	Primary	NSCLC	PD-1/PD-L1	5.58
P-0008922-T01-IM5	1	1	67	Male	Metastasis	NSCLC	PD-1/PD-L1	2.95
P-0009370-T01-IM5	1	0	67	Female	Primary	NSCLC	PD-1/PD-L1	8.85
P-0014764-T01-IM6	1	1	67	Female	Metastasis	NSCLC	PD-1/PD-L1	4.4
P-0023568-T01-IM6	0.9	1	67	Male	Metastasis	NSCLC	PD-1/PD-L1	24.6
P-0019605-T02-IM6	0.8	1	67	Male	Metastasis	NSCLC	PD-1/PD-L1	13.2
P-0036095-T01-IM6	60	0	67.1	Male	Metastasis	SKCM	PD-1/PD-L1	40.6408
P-0023032-T01-IM6	51.5132	0	67.3	Male	Metastasis	SKCM	PD-1/PD-L1	17.294
P-0014047-T03-IM6	50.4276	0	67.5	Female	Metastasis	SKCM	PD-1/PD-L1	17.294
P-0032650-T01-IM6	45.1316	0	67.5	Male	Metastasis	SKCM	PD-1/PD-L1	50.1525
P-0038936-T01-IM6	5.85526	0	67.7	Male	Metastasis	SKCM	PD-1/PD-L1	103.764
P-0021504-T01-IM6	36.0855	0	67.8	Female	Metastasis	SKCM	PD-1/PD-L1	6.05289
P-0015882-T01-IM6	34.8355	1	67.8	Female	Metastasis	SKCM	PD-1/PD-L1	25.0762
P-0009752-T01-IM5	21.6776	0	67.8	Male	Metastasis	SKCM	PD-1/PD-L1	238.808
P-0024221-T01-IM6	60	0	68	Female	Metastasis	SKCM	PD-1/PD-L1	6.05289
P-0021474-T01-IM6	51	0	68	Male	Metastasis	HNSC	PD-1/PD-L1	2.63314
P-0004527-T01-IM5	47	1	68	Female	Metastasis	SKCM	CTLA-4	5.9
P-0027041-T01-IM6	41	0	68	Female	Metastasis	Unknown	PD-1/PD-L1	6.144
P-0034283-T01-IM6	33.5526	0	68	Male	Metastasis	SKCM	PD-1/PD-L1	38.9114
P-0009106-T01-IM5	31	0	68	Female	Metastasis	SKCM	Combination	12.79
P-0005928-T01-IM5	29	0	68	Male	Metastasis	SKCM	PD-1/PD-L1	18.69
P-0004051-T01-IM5	28	0	68	Male	Metastasis	CRC	PD-1/PD-L1	68.8652
P-0002546-T01-IM3	25	1	68	Male	Primary	NSCLC	Combination	4.46
P-0005021-T01-IM5	25	0	68	Male	Primary	BLCA	PD-1/PD-L1	209.547
P-0008942-T01-IM5	25	0	68	Male	Metastasis	SKCM	Combination	35.42
P-0004517-T01-IM5	22	1	68	Male	Metastasis	NSCLC	PD-1/PD-L1	13.77
P-0016316-T01-IM6	22	0	68	Female	Primary	BLCA	PD-1/PD-L1	3.51086
P-0002265-T01-IM3	21	0	68	Male	Primary	BG	PD-1/PD-L1	2.23
P-0008841-T01-IM5	16	0	68	Female	Primary	CRC	PD-1/PD-L1	3.93516
P-0010636-T01-IM5	16	1	68	Male	Metastasis	NSCLC	PD-1/PD-L1	5.9
P-0013892-T01-IM5	16	1	68	Male	Metastasis	HNSC	PD-1/PD-L1	1.96758
P-0003726-T01-IM5	15	0	68	Female	Metastasis	HNSC	PD-1/PD-L1	0
P-0009831-T01-IM5	15	1	68	Female	Metastasis	SKCM	PD-1/PD-L1	1.97
P-0012370-T01-IM5	14	1	68	Male	Metastasis	HNSC	PD-1/PD-L1	0.983789
P-0015257-T01-IM6	14	0	68	Female	Primary	SKCM	PD-1/PD-L1	60.56
P-0016697-T01-IM6	14	0	68	Female	Metastasis	SKCM	PD-1/PD-L1	0.87
P-0009019-T01-IM5	13	1	68	Male	Metastasis	SKCM	PD-1/PD-L1	2.95
P-0015433-T01-IM6	13	0	68	Male	Primary	RCC	PD-1/PD-L1	0.88
P-0018927-T01-IM6	13	0	68	Female	Metastasis	EGC	Combination	7.89943
P-0011162-T01-IM5	12	1	68	Male	Primary	RCC	PD-1/PD-L1	3.94
P-0016855-T01-IM6	12	0	68	Male	Primary	BLCA	PD-1/PD-L1	7.89943
P-0008746-T01-IM5	11	0	68	Female	Primary	CRC	PD-1/PD-L1	48.2057
P-0012049-T01-IM5	11	0	68	Female	Primary	NSCLC	PD-1/PD-L1	10.82
P-0029148-T01-IM6	9.7	1	68	Male	Metastasis	NSCLC	PD-1/PD-L1	16.7
P-0004961-T01-IM5	9	1	68	Female	Metastasis	NSCLC	PD-1/PD-L1	0.98
P-0010317-T01-IM5	9	1	68	Male	Primary	EGC	PD-1/PD-L1	2.95137
P-0014022-T01-IM5	9	1	68	Male	Metastasis	HNSC	PD-1/PD-L1	0
P-0005266-T01-IM5	7	0	68	Male	Metastasis	BLCA	PD-1/PD-L1	5.90273
P-0005869-T01-IM5	7	1	68	Male	Metastasis	HNSC	PD-1/PD-L1	1.96758
P-0010174-T01-IM5	7	0	68	Male	Primary	HNSC	PD-1/PD-L1	11.8055
P-0017613-T01-IM5	7	1	68	Female	Metastasis	NSCLC	PD-1/PD-L1	2
P-0000681-T02-IM5	5.47	1	68	Female	Metastasis	NSCLC	PD-1/PD-L1	23.4893
P-0005131-T01-IM5	5	1	68	Female	Metastasis	BRCA	CTLA-4	1.97
P-0005289-T01-IM5	5	1	68	Male	Metastasis	NSCLC	PD-1/PD-L1	9.84
P-0016835-T01-IM6	5	0	68	Female	Metastasis	HNSC	PD-1/PD-L1	6.144
P-0022847-T01-IM6	5	1	68	Male	Metastasis	EGC	PD-1/PD-L1	5.26629
P-0007210-T01-IM5	4	1	68	Female	Primary	RCC	PD-1/PD-L1	3.94
P-0024561-T01-IM6	3.3	1	68	Female	Metastasis	NSCLC	PD-1/PD-L1	1.8
P-0001832-T01-IM3	3	1	68	Female	Metastasis	NSCLC	PD-1/PD-L1	4.46
P-0003899-T01-IM5	3	0	68	Male	Metastasis	SKCM	PD-1/PD-L1	1.97
P-0006993-T01-IM5	3	1	68	Male	Primary	NSCLC	PD-1/PD-L1	7.87
P-0017755-T01-IM6	3	0	68	Female	Metastasis	Unknown	PD-1/PD-L1	2.63314
P-0024866-T01-IM6	3	0	68	Male	Primary	HNSC	PD-1/PD-L1	59.6846
P-0025532-T01-IM6	3	0	68	Female	Primary	CRC	PD-1/PD-L1	41.2526
P-0019914-T02-IM6	3	1	68	Female	Metastasis	NSCLC	PD-1/PD-L1	7.9
P-0015749-T01-IM6	2.9	1	68	Male	Metastasis	NSCLC	PD-1/PD-L1	8.8
P-0013719-T01-IM5	2.2	1	68	Female	Metastasis	NSCLC	PD-1/PD-L1	5.9
P-0025657-T02-IM6	2.1	1	68	Female	Metastasis	NSCLC	PD-1/PD-L1	7.9
P-0009743-T01-IM5	2	1	68	Male	Metastasis	BLCA	PD-1/PD-L1	0
P-0011378-T01-IM5	2	1	68	Male	Metastasis	NSCLC	PD-1/PD-L1	8.85
P-0016063-T01-IM6	2	1	68	Male	Metastasis	Unknown	CTLA-4	3.51086
P-0017508-T01-IM6	2	1	68	Female	Primary	HNSC	PD-1/PD-L1	5.26629
P-0022291-T02-IM6	2	1	68	Female	Metastasis	NSCLC	PD-1/PD-L1	7.9
P-0012373-T01-IM5	1.77	1	68	Male	Metastasis	NSCLC	PD-1/PD-L1	39.1488
P-0027664-T01-IM6	1.2	1	68	Male	Metastasis	NSCLC	PD-1/PD-L1	4.4
P-0018078-T01-IM6	1.1	1	68	Female	Metastasis	NSCLC	PD-1/PD-L1	6.1
P-0008061-T01-IM5	1	1	68	Male	Metastasis	RCC	PD-1/PD-L1	8.85
P-0021375-T01-IM6	1	1	68	Male	Metastasis	NSCLC	PD-1/PD-L1	6.1
P-0003735-T01-IM5	0.87	1	68	Female	Metastasis	NSCLC	PD-1/PD-L1	0.97872
P-0029544-T01-IM6	10.7237	0	68.1	Male	Primary	SKCM	PD-1/PD-L1	6.05289
P-0024830-T01-IM6	51.5789	0	68.2	Male	Primary	SKCM	PD-1/PD-L1	4.32349
P-0035134-T01-IM6	20.2303	0	68.3	Male	Metastasis	SKCM	PD-1/PD-L1	12.9705
P-0020082-T01-IM6	18.6513	0	68.3	Male	Metastasis	SKCM	PD-1/PD-L1	53.6113
P-0026488-T02-IM6	57.6316	0	68.4	Male	Metastasis	SKCM	PD-1/PD-L1	24.2115
P-0025733-T01-IM6	17.1711	0	68.6	Male	Metastasis	SKCM	PD-1/PD-L1	8.64698
P-0034697-T01-IM6	60	0	68.8	Male	Metastasis	SKCM	PD-1/PD-L1	19.0234
P-0036260-T01-IM6	43.3882	0	68.8	Male	Metastasis	SKCM	PD-1/PD-L1	24.2115
P-0013166-T01-IM5	1.61184	0	68.8	Female	Metastasis	SKCM	PD-1/PD-L1	40.1275
P-0021934-T01-IM6	60	0	68.9	Male	Metastasis	SKCM	PD-1/PD-L1	6.05289
P-0021846-T01-IM6	60	0	68.9	Male	Metastasis	SKCM	PD-1/PD-L1	30.2644
P-0035523-T01-IM6	60	0	69	Female	Metastasis	SKCM	PD-1/PD-L1	11.2411
P-0005510-T01-IM5	55	0	69	Female	Primary	NSCLC	PD-1/PD-L1	5.9
P-0006510-T01-IM5	43	0	69	Female	Metastasis	RCC	PD-1/PD-L1	17.71
P-0005747-T01-IM5	29	0	69	Male	Metastasis	RCC	PD-1/PD-L1	2.95
P-0005627-T02-IM5	28	0	69	Male	Primary	BLCA	PD-1/PD-L1	27.5461
P-0000740-T01-IM3	24	0	69	Female	Primary	RCC	PD-1/PD-L1	5.58
P-0008249-T01-IM5	24	0	69	Male	Primary	RCC	PD-1/PD-L1	2.95
P-0012256-T01-IM5	24	0	69	Male	Metastasis	RCC	PD-1/PD-L1	6.89
P-0007916-T01-IM5	22	0	69	Male	Primary	NSCLC	PD-1/PD-L1	14.76
P-0008422-T03-IM6	21.9	0	69	Male	Metastasis	NSCLC	PD-1/PD-L1	5.3
P-0022140-T01-IM6	20.0329	0	69	Male	Metastasis	SKCM	PD-1/PD-L1	11.2411
P-0009108-T01-IM5	20	0	69	Male	Metastasis	SKCM	Combination	40.34
P-0002247-T01-IM3	19	1	69	Female	Primary	NSCLC	PD-1/PD-L1	21.19
P-0013200-T01-IM5	19	0	69	Female	Primary	SKCM	Combination	1.97
P-0013525-T01-IM5	19	0	69	Female	Metastasis	SKCM	CTLA-4	10.82
P-0004742-T01-IM5	18	0	69	Male	Metastasis	NSCLC	PD-1/PD-L1	7.87
P-0004890-T01-IM5	18	0	69	Female	Primary	NSCLC	PD-1/PD-L1	11.81
P-0013389-T01-IM5	18	0	69	Male	Metastasis	SKCM	PD-1/PD-L1	5.9
P-0003275-T01-IM5	17	1	69	Male	Primary	NSCLC	PD-1/PD-L1	2.95
P-0016046-T01-IM6	16	0	69	Female	Metastasis	NSCLC	PD-1/PD-L1	5.27
P-0015296-T01-IM6	15	0	69	Male	Metastasis	NSCLC	PD-1/PD-L1	20.19
P-0015501-T01-IM6	14	1	69	Male	Primary	BLCA	PD-1/PD-L1	15.7989
P-0015593-T01-IM6	14	0	69	Female	Primary	NSCLC	PD-1/PD-L1	4.39
P-0015697-T01-IM6	14	0	69	Female	Metastasis	SKCM	PD-1/PD-L1	18.43
P-0016720-T01-IM6	14	0	69	Male	Primary	BLCA	PD-1/PD-L1	5.26629
P-0000208-T01-IM3	13	1	69	Female	Primary	NSCLC	PD-1/PD-L1	2.23
P-0009451-T01-IM5	13	1	69	Male	Primary	BG	PD-1/PD-L1	5.9
P-0019804-T02-IM6	12.9	1	69	Female	Metastasis	NSCLC	PD-1/PD-L1	7
P-0002751-T01-IM3	11	1	69	Female	Primary	NSCLC	PD-1/PD-L1	2.23
P-0003650-T01-IM5	9	0	69	Male	Primary	EGC	PD-1/PD-L1	61.9787
P-0010389-T01-IM5	9	1	69	Male	Primary	NSCLC	PD-1/PD-L1	0
P-0011187-T01-IM5	9	1	69	Male	Metastasis	BLCA	PD-1/PD-L1	9.83789
P-0012729-T01-IM5	9	1	69	Male	Metastasis	NSCLC	PD-1/PD-L1	6.89
P-0020147-T01-IM6	9	0	69	Male	Metastasis	HNSC	PD-1/PD-L1	5.26629
P-0002575-T01-IM3	8	1	69	Male	Primary	BLCA	Combination	7.80671
P-0016224-T01-IM6	7.8	1	69	Female	Metastasis	NSCLC	PD-1/PD-L1	18.4
P-0008425-T01-IM5	7	1	69	Male	Primary	BLCA	PD-1/PD-L1	6.88652
P-0001186-T01-IM3	6	1	69	Male	Metastasis	HNSC	PD-1/PD-L1	1.11524
P-0013653-T01-IM5	5.43	1	69	Female	Metastasis	NSCLC	Combination	7.82976
P-0012149-T01-IM5	5.3	1	69	Male	Metastasis	NSCLC	Combination	1
P-0009526-T01-IM5	5	1	69	Male	Primary	NSCLC	PD-1/PD-L1	11.81
P-0004961-T02-IM5	4.37	1	69	Female	Metastasis	NSCLC	PD-1/PD-L1	4.8936
P-0001679-T01-IM3	4	1	69	Male	Metastasis	SKCM	CTLA-4	5.58
P-0020594-T01-IM6	4	1	69	Female	Metastasis	Unknown	PD-1/PD-L1	5.26629
P-0003000-T01-IM3	3	1	69	Male	Metastasis	BLCA	PD-1/PD-L1	6.69146
P-0008537-T01-IM5	3	1	69	Male	Metastasis	RCC	PD-1/PD-L1	0
P-0014513-T01-IM6	3	0	69	Female	Primary	NSCLC	PD-1/PD-L1	2.63
P-0015213-T01-IM6	2.3	1	69	Male	Metastasis	NSCLC	PD-1/PD-L1	7
P-0003255-T01-IM5	2	1	69	Male	Metastasis	SKCM	Combination	10.82
P-0005274-T01-IM5	2	1	69	Female	Metastasis	BRCA	PD-1/PD-L1	5.9
P-0018925-T01-IM6	2	1	69	Male	Metastasis	HNSC	PD-1/PD-L1	17.5543
P-0019390-T01-IM6	1.9	1	69	Male	Metastasis	NSCLC	PD-1/PD-L1	49.2
P-0021696-T01-IM6	1.6	1	69	Female	Metastasis	NSCLC	PD-1/PD-L1	8.8
P-0027259-T02-IM6	1.6	1	69	Male	Metastasis	NSCLC	PD-1/PD-L1	14.9
P-0023014-T01-IM6	1.3	1	69	Male	Metastasis	NSCLC	PD-1/PD-L1	4.4
P-0021094-T01-IM6	1.2	1	69	Female	Metastasis	NSCLC	PD-1/PD-L1	5.3
P-0018179-T01-IM6	1.1	1	69	Male	Metastasis	NSCLC	Combination	2.6
P-0009379-T01-IM5	1	1	69	Male	Primary	NSCLC	PD-1/PD-L1	8.85
P-0010355-T01-IM5	1	1	69	Female	Primary	NSCLC	PD-1/PD-L1	6.89
P-0023926-T01-IM6	0.8	1	69	Female	Metastasis	NSCLC	PD-1/PD-L1	5.3
P-0013406-T01-IM5	0.6	1	69	Male	Metastasis	NSCLC	PD-1/PD-L1	0
P-0017184-T01-IM6	0.5	1	69	Female	Metastasis	NSCLC	PD-1/PD-L1	2.6
P-0006267-T01-IM5	49.5066	0	69.2	Male	Metastasis	SKCM	PD-1/PD-L1	28.3829
P-0021737-T01-IM6	36.6118	0	69.3	Male	Metastasis	SKCM	PD-1/PD-L1	4.32349
P-0024262-T01-IM6	60	0	69.6	Male	Metastasis	SKCM	PD-1/PD-L1	143.54
P-0019137-T01-IM6	10.2961	1	69.8	Female	Metastasis	SKCM	PD-1/PD-L1	2.59409
P-0005048-T01-IM5	51	0	70	Female	Primary	NSCLC	Combination	3.94
P-0000968-T01-IM3	48	0	70	Male	Metastasis	SKCM	Combination	3.35
P-0007879-T01-IM5	31	0	70	Female	Primary	NSCLC	PD-1/PD-L1	9.84
P-0007810-T02-IM5	27	0	70	Male	Metastasis	SKCM	PD-1/PD-L1	43.29
P-0003553-T01-IM5	21	0	70	Female	Metastasis	NSCLC	PD-1/PD-L1	30.5
P-0008792-T01-IM5	21	0	70	Male	Metastasis	HNSC	PD-1/PD-L1	10.8217
P-0015615-T01-IM6	21	0	70	Male	Metastasis	BLCA	PD-1/PD-L1	2.63314
P-0013111-T01-IM5	20	0	70	Male	Metastasis	SKCM	PD-1/PD-L1	20.66
P-0013314-T01-IM5	20	1	70	Female	Metastasis	EGC	PD-1/PD-L1	0.983789
P-0006414-T01-IM5	19	0	70	Female	Primary	EGC	PD-1/PD-L1	7.87031
P-0012188-T01-IM5	18	0	70	Male	Metastasis	Unknown	PD-1/PD-L1	20.6596
P-0028473-T01-IM6	17.4	0	70	Male	Metastasis	NSCLC	Combination	31.6
P-0012282-T01-IM5	17	0	70	Male	Primary	SKCM	CTLA-4	10.82
P-0009790-T01-IM5	16	1	70	Male	Primary	BG	PD-1/PD-L1	2.95
P-0011537-T02-IM6	15.6	1	70	Male	Metastasis	NSCLC	PD-1/PD-L1	3.5
P-0002292-T01-IM3	15	1	70	Male	Primary	BLCA	PD-1/PD-L1	14.4982
P-0002818-T01-IM3	15	0	70	Female	Metastasis	HNSC	PD-1/PD-L1	20.0744
P-0007104-T01-IM5	15	0	70	Male	Primary	BG	PD-1/PD-L1	3.94
P-0023562-T01-IM6	13.8	1	70	Female	Metastasis	NSCLC	PD-1/PD-L1	0.9
P-0000938-T01-IM3	13	1	70	Male	Primary	EGC	Combination	3.34573
P-0001733-T01-IM3	13	0	70	Male	Primary	EGC	Combination	4.46097
P-0010915-T01-IM5	13	1	70	Female	Primary	SKCM	PD-1/PD-L1	19.68
P-0013233-T01-IM5	13	0	70	Female	Metastasis	NSCLC	PD-1/PD-L1	7.87
P-0015471-T01-IM6	13	0	70	Male	Metastasis	SKCM	PD-1/PD-L1	1.76
P-0016910-T01-IM6	13	0	70	Female	Primary	NSCLC	PD-1/PD-L1	2.63
P-0040848-T01-IM6	11.8	1	70	Female	Metastasis	NSCLC	PD-1/PD-L1	5.3
P-0001867-T01-IM3	9	1	70	Male	Metastasis	CRC	PD-1/PD-L1	14.4982
P-0008784-T02-IM5	8	1	70	Female	Metastasis	SKCM	PD-1/PD-L1	8.85
P-0013920-T01-IM5	8	1	70	Male	Metastasis	HNSC	PD-1/PD-L1	9.83789
P-0020175-T01-IM6	8	0	70	Male	Primary	EGC	PD-1/PD-L1	4.38857
P-0007583-T01-IM5	7	1	70	Female	Metastasis	NSCLC	PD-1/PD-L1	13.77
P-0015965-T01-IM6	6	1	70	Female	Metastasis	BLCA	PD-1/PD-L1	3.51086
P-0026121-T01-IM6	5.5	1	70	Male	Metastasis	NSCLC	PD-1/PD-L1	3.5
P-0009910-T01-IM5	5	1	70	Female	Metastasis	BLCA	PD-1/PD-L1	14.7568
P-0019428-T01-IM6	5	0	70	Female	Primary	CRC	PD-1/PD-L1	46.5189
P-0028930-T01-IM6	4.3	1	70	Male	Metastasis	NSCLC	PD-1/PD-L1	7.9
P-0003432-T01-IM5	4	1	70	Male	Metastasis	EGC	PD-1/PD-L1	5.90273
P-0006869-T01-IM5	4	1	70	Male	Metastasis	EGC	PD-1/PD-L1	1.96758
P-0008004-T01-IM5	4	1	70	Female	Metastasis	EGC	PD-1/PD-L1	1.96758
P-0021911-T01-IM6	4	1	70	Female	Metastasis	Unknown	PD-1/PD-L1	7.89943
P-0002279-T01-IM3	3	1	70	Female	Primary	NSCLC	PD-1/PD-L1	6.69
P-0003911-T01-IM5	3	1	70	Female	Metastasis	BLCA	PD-1/PD-L1	4.91895
P-0007977-T01-IM5	3	1	70	Female	Metastasis	NSCLC	PD-1/PD-L1	6.89
P-0016237-T01-IM6	3	1	70	Male	Metastasis	Unknown	PD-1/PD-L1	1.75543
P-0019657-T01-IM6	3	1	70	Male	Metastasis	EGC	PD-1/PD-L1	5.26629
P-0022441-T01-IM6	3	0	70	Female	Metastasis	HNSC	PD-1/PD-L1	11.4103
P-0024263-T01-IM6	3	0	70	Male	Primary	BLCA	PD-1/PD-L1	7.02172
P-0004650-T01-IM5	2.79605	0	70	Male	Metastasis	SKCM	PD-1/PD-L1	57.7445
P-0001296-T01-IM3	2	1	70	Female	Metastasis	NSCLC	PD-1/PD-L1	3.35
P-0001365-T01-IM3	2	1	70	Male	Primary	NSCLC	PD-1/PD-L1	5.58
P-0017712-T01-IM6	2	1	70	Male	Metastasis	BLCA	PD-1/PD-L1	8.77715
P-0006540-T01-IM5	1.67	1	70	Male	Metastasis	NSCLC	Combination	11.7446
P-0011030-T01-IM5	1	1	70	Male	Metastasis	NSCLC	PD-1/PD-L1	0.98
P-0024068-T01-IM6	1	0	70	Female	Metastasis	EGC	PD-1/PD-L1	33.3532
P-0033950-T01-IM6	17.5658	0	70.2	Male	Metastasis	SKCM	PD-1/PD-L1	8.64698
P-0023848-T01-IM6	60	0	70.3	Male	Metastasis	SKCM	PD-1/PD-L1	35.4526
P-0017830-T01-IM6	54.1776	0	70.3	Male	Metastasis	SKCM	PD-1/PD-L1	69.1758
P-0016928-T01-IM6	34.1118	0	70.3	Male	Metastasis	SKCM	PD-1/PD-L1	55.3407
P-0022759-T01-IM6	31.0526	0	70.4	Female	Metastasis	SKCM	PD-1/PD-L1	14.6999
P-0034034-T01-IM6	24.2434	0	70.4	Female	Primary	SKCM	PD-1/PD-L1	6.05289
P-0022384-T01-IM6	36.5789	0	70.5	Male	Metastasis	SKCM	PD-1/PD-L1	17.294
P-0018304-T01-IM6	54.0789	0	70.6	Female	Metastasis	SKCM	PD-1/PD-L1	5.18819
P-0035430-T01-IM6	8.48684	0	70.6	Male	Primary	SKCM	PD-1/PD-L1	3.45879
P-0002437-T01-IM3	3.78289	1	70.6	Female	Metastasis	SKCM	PD-1/PD-L1	12.2007
P-0040246-T01-IM6	2.56579	0	70.8	Male	Metastasis	SKCM	PD-1/PD-L1	38.9114
P-0025541-T01-IM6	41.2171	0	70.9	Male	Primary	SKCM	PD-1/PD-L1	11.2411
P-0011081-T01-IM5	38.8487	1	70.9	Female	Metastasis	SKCM	PD-1/PD-L1	7.82976
P-0023139-T01-IM6	60	0	71	Male	Metastasis	SKCM	PD-1/PD-L1	7.78228
P-0009497-T01-IM5	56	0	71	Male	Primary	SKCM	CTLA-4	2.95
P-0009655-T01-IM5	56	0	71	Female	Primary	NSCLC	Combination	2.95
P-0018466-T01-IM6	53.3553	0	71	Male	Metastasis	SKCM	PD-1/PD-L1	7.78228
P-0003743-T01-IM5	51	0	71	Male	Metastasis	SKCM	Combination	8.85
P-0005719-T01-IM5	48	0	71	Male	Metastasis	RCC	PD-1/PD-L1	3.94
P-0000596-T01-IM3	42	0	71	Male	Metastasis	SKCM	CTLA-4	42.38
P-0002706-T01-IM3	32	1	71	Female	Metastasis	SKCM	CTLA-4	18.96
P-0006557-T01-IM5	30	0	71	Male	Metastasis	RCC	PD-1/PD-L1	8.85
P-0007971-T01-IM5	29	1	71	Male	Metastasis	HNSC	PD-1/PD-L1	5.90273
P-0015660-T01-IM6	28	1	71	Male	Metastasis	BLCA	Combination	9.65486
P-0002151-T01-IM3	25	0	71	Female	Metastasis	NSCLC	PD-1/PD-L1	10.04
P-0015078-T01-IM6	25	0	71	Female	Metastasis	NSCLC	PD-1/PD-L1	7.9
P-0002182-T01-IM3	22	1	71	Female	Metastasis	SKCM	Combination	0
P-0003944-T01-IM3	21	1	71	Male	Primary	EGC	CTLA-4	5.57622
P-0005898-T01-IM5	21	0	71	Female	Primary	NSCLC	PD-1/PD-L1	3.94
P-0006735-T01-IM5	20	0	71	Male	Metastasis	CRC	PD-1/PD-L1	3.93516
P-0014910-T01-IM6	20	0	71	Male	Metastasis	SKCM	PD-1/PD-L1	35.99
P-0001850-T01-IM3	17	0	71	Male	Primary	EGC	PD-1/PD-L1	1.11524
P-0004189-T01-IM5	16	0	71	Male	Metastasis	NSCLC	PD-1/PD-L1	59.03
P-0009762-T01-IM5	16	1	71	Male	Primary	NSCLC	PD-1/PD-L1	7.87
P-0012361-T01-IM5	16	1	71	Male	Metastasis	SKCM	PD-1/PD-L1	47.22
P-0015966-T01-IM6	15	0	71	Male	Metastasis	BLCA	PD-1/PD-L1	23.6983
P-0034282-T01-IM6	14.8355	0	71	Male	Metastasis	SKCM	PD-1/PD-L1	23.3468
P-0016308-T01-IM6	14	1	71	Female	Metastasis	NSCLC	PD-1/PD-L1	14.92
P-0023896-T01-IM6	14	0	71	Male	Primary	HNSC	PD-1/PD-L1	3.51086
P-0027673-T01-IM6	13.5	0	71	Female	Metastasis	NSCLC	PD-1/PD-L1	14
P-0005725-T01-IM5	13	0	71	Male	Metastasis	SKCM	PD-1/PD-L1	26.56
P-0010670-T01-IM5	13	0	71	Male	Metastasis	SKCM	Combination	11.81
P-0012999-T01-IM5	13	1	71	Male	Metastasis	SKCM	Combination	21.64
P-0018771-T02-IM6	13	0	71	Male	Primary	EGC	PD-1/PD-L1	8.77715
P-0006268-T01-IM5	12	1	71	Male	Metastasis	NSCLC	PD-1/PD-L1	1.97
P-0018340-T01-IM6	12	0	71	Male	Primary	EGC	PD-1/PD-L1	4.38857
P-0009057-T01-IM5	10	1	71	Female	Metastasis	EGC	PD-1/PD-L1	43.2867
P-0015987-T01-IM6	10	1	71	Female	Metastasis	NSCLC	PD-1/PD-L1	7.9
P-0000454-T01-IM3	9	0	71	Male	Metastasis	HNSC	PD-1/PD-L1	2.23049
P-0008532-T01-IM5	9	1	71	Male	Metastasis	BLCA	PD-1/PD-L1	3.93516
P-0001485-T01-IM3	7	1	71	Male	Metastasis	SKCM	CTLA-4	76.95
P-0021454-T01-IM6	7	0	71	Female	Primary	Unknown	PD-1/PD-L1	7.89943
P-0011499-T01-IM5	6	1	71	Female	Metastasis	NSCLC	PD-1/PD-L1	7.87
P-0014562-T01-IM6	6	0	71	Male	Metastasis	NSCLC	PD-1/PD-L1	12.29
P-0022510-T01-IM6	6	1	71	Male	Primary	EGC	PD-1/PD-L1	5.26629
P-0018229-T01-IM6	5	0	71	Female	Metastasis	BLCA	PD-1/PD-L1	4.38857
P-0033979-T01-IM6	4.6	1	71	Female	Metastasis	NSCLC	PD-1/PD-L1	0.9
P-0010501-T01-IM5	4	1	71	Male	Metastasis	EGC	PD-1/PD-L1	9.83789
P-0011288-T01-IM5	4	0	71	Female	Primary	CRC	Combination	10.8217
P-0016925-T01-IM6	4	1	71	Male	Primary	BLCA	PD-1/PD-L1	24.576
P-0017241-T01-IM6	4	1	71	Male	Primary	BLCA	PD-1/PD-L1	5.26629
P-0025827-T01-IM6	4	0	71	Male	Primary	BLCA	PD-1/PD-L1	8.77715
P-0022304-T01-IM6	4	1	71	Male	Metastasis	NSCLC	PD-1/PD-L1	0.9
P-0031665-T01-IM6	3	1	71	Male	Metastasis	NSCLC	PD-1/PD-L1	7.9
P-0025956-T01-IM6	2.6	1	71	Female	Metastasis	NSCLC	PD-1/PD-L1	5.3
P-0002225-T02-IM5	2.57	1	71	Male	Metastasis	NSCLC	PD-1/PD-L1	2.93616
P-0000363-T01-IM3	2	1	71	Male	Primary	NSCLC	PD-1/PD-L1	13.38
P-0001807-T01-IM3	2	1	71	Male	Metastasis	CRC	PD-1/PD-L1	5.57622
P-0007051-T01-IM5	2	1	71	Male	Metastasis	NSCLC	PD-1/PD-L1	13.77
P-0010495-T01-IM5	2	1	71	Female	Metastasis	SKCM	PD-1/PD-L1	4.92
P-0020167-T01-IM6	2	1	71	Male	Metastasis	BLCA	PD-1/PD-L1	4.38857
P-0028173-T01-IM6	1.9	1	71	Female	Metastasis	NSCLC	PD-1/PD-L1	4.4
P-0001365-T02-IM3	1.87	1	71	Male	Metastasis	NSCLC	PD-1/PD-L1	12.2007
P-0017722-T01-IM6	1.3	1	71	Male	Metastasis	NSCLC	PD-1/PD-L1	5.3
P-0016692-T01-IM6	1.1	1	71	Male	Metastasis	NSCLC	PD-1/PD-L1	12.3
P-0007918-T01-IM5	1	1	71	Male	Metastasis	SKCM	Combination	56.08
P-0022033-T01-IM6	0.7	1	71	Female	Metastasis	NSCLC	PD-1/PD-L1	6.1
P-0025530-T01-IM6	60	0	71.1	Female	Metastasis	SKCM	PD-1/PD-L1	12.9705
P-0023777-T01-IM6	42.8289	0	71.1	Male	Metastasis	SKCM	PD-1/PD-L1	46.6937
P-0025093-T01-IM6	29.3421	0	71.1	Male	Metastasis	SKCM	PD-1/PD-L1	11.2411
P-0013598-T01-IM5	22.2697	0	71.2	Male	Metastasis	SKCM	PD-1/PD-L1	16.6382
P-0039052-T01-IM6	2.76316	0	71.3	Male	Primary	SKCM	PD-1/PD-L1	22.4822
P-0013679-T01-IM5	60	0	71.4	Female	Metastasis	SKCM	PD-1/PD-L1	20.5531
P-0022012-T01-IM6	6.57895	1	71.6	Male	Metastasis	SKCM	PD-1/PD-L1	4.32349
P-0024995-T01-IM6	32.9276	0	71.7	Male	Metastasis	SKCM	PD-1/PD-L1	12.9705
P-0026326-T01-IM6	52.6974	0	71.8	Male	Metastasis	SKCM	PD-1/PD-L1	15.5646
P-0017966-T01-IM6	60	0	71.9	Male	Metastasis	SKCM	PD-1/PD-L1	16.4293
P-0016027-T01-IM6	47.5329	0	71.9	Male	Metastasis	SKCM	PD-1/PD-L1	18.1587
P-0012267-T01-IM5	45	0	72	Female	Primary	RCC	Combination	3.94
P-0006239-T01-IM5	42	0	72	Male	Primary	RCC	PD-1/PD-L1	3.94
P-0002490-T01-IM3	41	1	72	Male	Metastasis	SKCM	Combination	126.02
P-0004349-T01-IM5	35	0	72	Female	Metastasis	SKCM	PD-1/PD-L1	6.89
P-0005494-T01-IM5	33	0	72	Male	Metastasis	RCC	Combination	0
P-0005421-T01-IM5	32	0	72	Male	Primary	SKCM	PD-1/PD-L1	15.74
P-0006542-T01-IM5	32	0	72	Male	Primary	RCC	Combination	9.84
P-0006392-T01-IM5	25	0	72	Male	Primary	RCC	PD-1/PD-L1	3.94
P-0009347-T01-IM5	25	0	72	Male	Primary	RCC	Combination	9.84
P-0008176-T01-IM5	23	0	72	Female	Primary	NSCLC	PD-1/PD-L1	3.94
P-0009944-T01-IM5	23	0	72	Female	Metastasis	SKCM	Combination	1.97
P-0005750-T01-IM5	21	0	72	Male	Metastasis	RCC	PD-1/PD-L1	7.87
P-0006582-T01-IM5	19	0	72	Female	Metastasis	NSCLC	PD-1/PD-L1	4.92
P-0002225-T01-IM3	17	1	72	Male	Metastasis	NSCLC	PD-1/PD-L1	1.12
P-0027455-T01-IM6	15.1	1	72	Male	Metastasis	NSCLC	PD-1/PD-L1	0
P-0010079-T01-IM5	15	0	72	Male	Metastasis	BLCA	PD-1/PD-L1	2.95137
P-0013814-T01-IM5	15	0	72	Male	Primary	BG	PD-1/PD-L1	5.9
P-0015067-T01-IM6	14	0	72	Male	Metastasis	BLCA	PD-1/PD-L1	8.77715
P-0015745-T01-IM6	14	0	72	Male	Metastasis	HNSC	PD-1/PD-L1	5.26629
P-0003322-T01-IM5	13	0	72	Female	Primary	NSCLC	Combination	2.95
P-0012192-T02-IM5	12.8	0	72	Female	Metastasis	NSCLC	Combination	13.7021
P-0007876-T01-IM5	12	0	72	Female	Metastasis	SKCM	PD-1/PD-L1	37.38
P-0008733-T01-IM5	12	1	72	Male	Metastasis	SKCM	PD-1/PD-L1	8.85
P-0005180-T01-IM5	11	1	72	Male	Primary	SKCM	PD-1/PD-L1	1.97
P-0012870-T03-IM6	11	1	72	Male	Primary	BLCA	PD-1/PD-L1	9.65486
P-0027707-T01-IM6	10.1316	0	72	Male	Metastasis	SKCM	PD-1/PD-L1	11.2411
P-0007235-T01-IM5	9	1	72	Female	Primary	SKCM	Combination	8.85
P-0008662-T01-IM5	9	0	72	Female	Primary	CRC	PD-1/PD-L1	1.96758
P-0016188-T01-IM6	8	0	72	Male	Metastasis	Unknown	PD-1/PD-L1	26.3314
P-0017599-T01-IM5	7	1	72	Male	Metastasis	BLCA	PD-1/PD-L1	6.88652
P-0000746-T01-IM3	6	1	72	Male	Primary	BLCA	PD-1/PD-L1	15.6134
P-0008188-T01-IM5	5	1	72	Female	Primary	EGC	PD-1/PD-L1	47.2219
P-0013304-T01-IM5	5	1	72	Male	Metastasis	BLCA	PD-1/PD-L1	0.983789
P-0003964-T01-IM3	4	1	72	Male	Metastasis	NSCLC	PD-1/PD-L1	10.04
P-0009005-T01-IM5	4	1	72	Male	Metastasis	BLCA	PD-1/PD-L1	11.8055
P-0010222-T01-IM5	4	1	72	Male	Metastasis	HNSC	PD-1/PD-L1	2.95137
P-0012076-T01-IM5	3.5	1	72	Male	Metastasis	NSCLC	Combination	4.8936
P-0035638-T01-IM6	3.1	1	72	Male	Metastasis	NSCLC	PD-1/PD-L1	13.2
P-0012341-T01-IM5	3	1	72	Female	Metastasis	NSCLC	PD-1/PD-L1	5.9
P-0018028-T01-IM6	3	1	72	Male	Primary	BLCA	PD-1/PD-L1	8.77715
P-0024795-T01-IM6	3	0	72	Female	Primary	BLCA	PD-1/PD-L1	12.288
P-0022103-T01-IM6	2.5	1	72	Female	Metastasis	NSCLC	PD-1/PD-L1	4.4
P-0012931-T01-IM5	2	0	72	Male	Metastasis	NSCLC	PD-1/PD-L1	9.84
P-0001904-T01-IM3	1	1	72	Female	Metastasis	BLCA	PD-1/PD-L1	6.69146
P-0002404-T01-IM3	1	1	72	Male	Primary	BLCA	PD-1/PD-L1	3.34573
P-0009337-T01-IM5	1	1	72	Male	Primary	EGC	PD-1/PD-L1	3.93516
P-0021403-T01-IM6	1	0	72	Male	Metastasis	EGC	Combination	6.144
P-0029387-T01-IM6	26.8421	0	72.2	Male	Metastasis	SKCM	PD-1/PD-L1	28.535
P-0005370-T01-IM5	6.97368	1	72.2	Male	Primary	SKCM	PD-1/PD-L1	12.7234
P-0020641-T01-IM6	60	0	72.3	Female	Metastasis	SKCM	PD-1/PD-L1	14.6999
P-0020288-T03-IM6	45.2961	0	72.5	Female	Metastasis	SKCM	PD-1/PD-L1	31.1291
P-0015832-T01-IM6	3.98026	1	72.5	Male	Metastasis	SKCM	PD-1/PD-L1	35.4526
P-0021075-T01-IM6	54.3421	0	72.9	Male	Metastasis	SKCM	PD-1/PD-L1	33.7232
P-0006488-T01-IM5	50	0	73	Female	Metastasis	SKCM	Combination	6.89
P-0000731-T01-IM3	42	0	73	Female	Metastasis	NSCLC	PD-1/PD-L1	6.69
P-0001361-T01-IM3	42	1	73	Male	Metastasis	SKCM	CTLA-4	34.57
P-0004413-T01-IM5	39	0	73	Female	Primary	RCC	PD-1/PD-L1	1.97
P-0003700-T01-IM5	36	0	73	Male	Metastasis	SKCM	Combination	3.94
P-0023765-T01-IM6	35.9539	0	73	Male	Metastasis	SKCM	PD-1/PD-L1	127.111
P-0004588-T01-IM5	30	0	73	Male	Primary	NSCLC	PD-1/PD-L1	3.94
P-0005295-T01-IM5	29	0	73	Male	Metastasis	NSCLC	PD-1/PD-L1	3.94
P-0006467-T01-IM5	29	0	73	Male	Metastasis	SKCM	Combination	2.95
P-0004150-T01-IM5	25	0	73	Male	Primary	RCC	PD-1/PD-L1	5.9
P-0008678-T01-IM5	25	0	73	Female	Metastasis	NSCLC	PD-1/PD-L1	7.87
P-0009501-T01-IM5	23	1	73	Male	Primary	NSCLC	PD-1/PD-L1	5.9
P-0010256-T01-IM5	21	1	73	Female	Primary	NSCLC	PD-1/PD-L1	3.94
P-0006572-T01-IM5	20	0	73	Male	Metastasis	NSCLC	PD-1/PD-L1	0
P-0012678-T01-IM5	20	0	73	Male	Metastasis	NSCLC	PD-1/PD-L1	23.61
P-0012420-T01-IM5	19	0	73	Male	Metastasis	SKCM	PD-1/PD-L1	11.81
P-0010648-T01-IM5	18	1	73	Male	Metastasis	NSCLC	PD-1/PD-L1	1.97
P-0005522-T01-IM5	17	0	73	Female	Metastasis	CRC	PD-1/PD-L1	6.88652
P-0007127-T01-IM5	15	1	73	Female	Metastasis	BRCA	CTLA-4	3.94
P-0015438-T01-IM6	15	0	73	Male	Metastasis	SKCM	Combination	69.34
P-0016033-T01-IM6	15	0	73	Male	Primary	NSCLC	PD-1/PD-L1	29.84
P-0016177-T01-IM6	15	0	73	Male	Metastasis	SKCM	PD-1/PD-L1	5.27
P-0010450-T01-IM5	14	1	73	Male	Metastasis	HNSC	PD-1/PD-L1	8.8541
P-0016174-T01-IM6	14	0	73	Female	Primary	NSCLC	PD-1/PD-L1	14.04
P-0018371-T01-IM6	13	0	73	Male	Metastasis	EGC	PD-1/PD-L1	4.38857
P-0002921-T01-IM3	12	1	73	Female	Primary	NSCLC	PD-1/PD-L1	14.5
P-0018986-T01-IM6	12	0	73	Female	Primary	EGC	PD-1/PD-L1	10.5326
P-0020542-T01-IM6	12	0	73	Male	Primary	BLCA	PD-1/PD-L1	6.144
P-0002351-T01-IM3	11	1	73	Female	Primary	NSCLC	PD-1/PD-L1	7.81
P-0004494-T01-IM5	11	0	73	Female	Primary	CRC	PD-1/PD-L1	9.83789
P-0016546-T01-IM6	11	1	73	Male	Primary	BLCA	PD-1/PD-L1	23.6983
P-0021034-T01-IM6	10.6	1	73	Female	Metastasis	NSCLC	PD-1/PD-L1	7.9
P-0020065-T01-IM6	10	0	73	Male	Metastasis	BLCA	PD-1/PD-L1	17.5543
P-0008715-T01-IM5	9.1	1	73	Male	Metastasis	NSCLC	Combination	18.5957
P-0006270-T01-IM5	9	1	73	Female	Primary	BLCA	PD-1/PD-L1	3.93516
P-0016185-T01-IM6	9	1	73	Male	Primary	NSCLC	PD-1/PD-L1	6.14
P-0011535-T01-IM5	8	1	73	Female	Primary	NSCLC	PD-1/PD-L1	2.95
P-0009311-T01-IM5	7	1	73	Female	Metastasis	SKCM	Combination	31.48
P-0011559-T01-IM5	7	1	73	Male	Metastasis	NSCLC	PD-1/PD-L1	3.94
P-0013094-T01-IM5	7	1	73	Female	Metastasis	Unknown	PD-1/PD-L1	7.87031
P-0021503-T01-IM6	7	1	73	Male	Metastasis	BLCA	PD-1/PD-L1	21.9429
P-0002905-T01-IM3	6	1	73	Male	Primary	NSCLC	PD-1/PD-L1	5.58
P-0007597-T01-IM5	5	1	73	Male	Metastasis	NSCLC	PD-1/PD-L1	15.74
P-0020140-T02-IM6	5	1	73	Male	Metastasis	Unknown	PD-1/PD-L1	9.65486
P-0025146-T01-IM6	5	0	73	Male	Primary	EGC	PD-1/PD-L1	0.877715
P-0002252-T01-IM3	4.27	1	73	Female	Metastasis	NSCLC	PD-1/PD-L1	16.6373
P-0007517-T01-IM5	4	1	73	Male	Metastasis	SKCM	Combination	7.87
P-0011552-T01-IM5	4	1	73	Female	Metastasis	BRCA	PD-1/PD-L1	5.9
P-0010063-T01-IM5	2.6	1	73	Male	Metastasis	NSCLC	PD-1/PD-L1	4.9
P-0019252-T03-IM6	2.1	1	73	Female	Metastasis	NSCLC	PD-1/PD-L1	13.2
P-0003892-T01-IM5	2	0	73	Female	Metastasis	EGC	Combination	2.95137
P-0007514-T01-IM5	2	1	73	Female	Primary	NSCLC	PD-1/PD-L1	3.94
P-0008518-T01-IM5	2	1	73	Male	Metastasis	HNSC	PD-1/PD-L1	0.983789
P-0025394-T01-IM6	2	0	73	Male	Primary	EGC	Combination	7.02172
P-0017637-T01-IM5	1.7	1	73	Male	Metastasis	NSCLC	PD-1/PD-L1	7.9
P-0027713-T01-IM6	1.1	1	73	Male	Metastasis	NSCLC	PD-1/PD-L1	2.6
P-0006516-T01-IM5	1	1	73	Male	Primary	NSCLC	PD-1/PD-L1	1.97
P-0009539-T01-IM5	1	1	73	Female	Metastasis	NSCLC	PD-1/PD-L1	0
P-0014600-T01-IM6	1	1	73	Male	Primary	RCC	PD-1/PD-L1	5.27
P-0015177-T01-IM6	1	1	73	Male	Primary	NSCLC	PD-1/PD-L1	8.78
P-0014319-T01-IM6	0.7	1	73	Female	Metastasis	NSCLC	PD-1/PD-L1	2.6
P-0026958-T01-IM6	0.6	1	73	Female	Metastasis	NSCLC	PD-1/PD-L1	9.7
P-0019599-T01-IM6	0.5	1	73	Male	Metastasis	NSCLC	PD-1/PD-L1	42.1
P-0014946-T01-IM6	50.8882	0	73.1	Male	Metastasis	SKCM	PD-1/PD-L1	86.4698
P-0013481-T01-IM5	39.6053	1	73.1	Male	Metastasis	SKCM	PD-1/PD-L1	10.7659
P-0016282-T01-IM6	21.4803	0	73.1	Male	Metastasis	SKCM	PD-1/PD-L1	25.9409
P-0021847-T01-IM6	17.7961	0	73.2	Male	Primary	SKCM	PD-1/PD-L1	41.5055
P-0019939-T01-IM6	39.4737	0	73.5	Male	Metastasis	SKCM	PD-1/PD-L1	68.3111
P-0015917-T01-IM6	33.6513	0	73.5	Male	Primary	SKCM	PD-1/PD-L1	41.5055
P-0021046-T01-IM6	14.4408	1	73.5	Male	Metastasis	SKCM	PD-1/PD-L1	53.6113
P-0030290-T01-IM6	12.6645	0	73.6	Male	Primary	SKCM	PD-1/PD-L1	102.034
P-0022096-T01-IM6	60	0	73.8	Male	Metastasis	SKCM	PD-1/PD-L1	143.54
P-0029764-T01-IM6	34.8355	0	73.8	Male	Metastasis	SKCM	PD-1/PD-L1	30.2644
P-0037873-T01-IM6	60	0	73.9	Female	Metastasis	SKCM	PD-1/PD-L1	28.535
P-0021526-T01-IM6	41.6776	0	73.9	Female	Metastasis	SKCM	PD-1/PD-L1	23.3468
P-0020319-T01-IM6	60	0	74	Male	Metastasis	SKCM	PD-1/PD-L1	19.0234
P-0002668-T01-IM3	41	0	74	Male	Primary	BLCA	PD-1/PD-L1	11.1524
P-0001756-T01-IM3	40	0	74	Male	Primary	SKCM	CTLA-4	45.72
P-0006034-T01-IM5	30	0	74	Male	Metastasis	SKCM	Combination	45.25
P-0023510-T01-IM6	26.0197	0	74	Male	Metastasis	SKCM	PD-1/PD-L1	46.6937
P-0008857-T01-IM5	24	0	74	Female	Metastasis	SKCM	PD-1/PD-L1	51.16
P-0005655-T01-IM5	23	0	74	Female	Primary	SKCM	PD-1/PD-L1	3.94
P-0009068-T01-IM5	22	0	74	Female	Metastasis	NSCLC	PD-1/PD-L1	19.68
P-0002517-T01-IM3	19	1	74	Male	Metastasis	SKCM	CTLA-4	2.23
P-0008062-T01-IM5	18	0	74	Female	Metastasis	BLCA	PD-1/PD-L1	7.87031
P-0005929-T01-IM5	15	1	74	Female	Primary	BG	PD-1/PD-L1	5.9
P-0008239-T01-IM5	15	1	74	Female	Metastasis	NSCLC	PD-1/PD-L1	15.74
P-0015937-T01-IM6	15	0	74	Female	Metastasis	NSCLC	PD-1/PD-L1	10.53
P-0016210-T01-IM6	14	0	74	Male	Metastasis	HNSC	PD-1/PD-L1	4.38857
P-0005366-T01-IM5	13	1	74	Male	Metastasis	SKCM	PD-1/PD-L1	150.52
P-0015214-T01-IM6	13	1	74	Female	Metastasis	NSCLC	PD-1/PD-L1	24.58
P-0045298-T01-IM6	12.7	0	74	Male	Metastasis	NSCLC	PD-1/PD-L1	29.8
P-0014422-T01-IM6	11	0	74	Female	Metastasis	BLCA	PD-1/PD-L1	18.432
P-0012925-T01-IM5	10	1	74	Male	Primary	NSCLC	PD-1/PD-L1	5.9
P-0014061-T02-IM6	9.6	0	74	Female	Metastasis	NSCLC	PD-1/PD-L1	25.5
P-0009020-T01-IM5	8	1	74	Female	Primary	NSCLC	PD-1/PD-L1	12.79
P-0021622-T01-IM6	8	0	74	Male	Primary	BLCA	PD-1/PD-L1	7.89943
P-0009080-T01-IM5	7	1	74	Male	Metastasis	NSCLC	PD-1/PD-L1	5.9
P-0010855-T01-IM5	7	1	74	Female	Metastasis	NSCLC	PD-1/PD-L1	6.89
P-0024764-T01-IM6	5.1	1	74	Female	Metastasis	NSCLC	PD-1/PD-L1	12.3
P-0010380-T01-IM5	5	1	74	Male	Primary	BG	PD-1/PD-L1	6.89
P-0014772-T01-IM6	5	1	74	Female	Metastasis	NSCLC	PD-1/PD-L1	8.78
P-0001830-T01-IM3	4.63	1	74	Female	Metastasis	NSCLC	Combination	12.2007
P-0004612-T01-IM5	4	1	74	Male	Primary	NSCLC	PD-1/PD-L1	3.94
P-0008323-T01-IM5	4	1	74	Male	Metastasis	HNSC	PD-1/PD-L1	0
P-0010215-T01-IM5	3	1	74	Female	Metastasis	NSCLC	PD-1/PD-L1	6.89
P-0011012-T01-IM5	3	1	74	Male	Metastasis	NSCLC	PD-1/PD-L1	3.94
P-0020591-T01-IM6	3	0	74	Male	Metastasis	Unknown	PD-1/PD-L1	20.1874
P-0024084-T01-IM6	3	0	74	Male	Metastasis	Unknown	PD-1/PD-L1	1.75543
P-0026250-T01-IM6	3	0	74	Female	Metastasis	EGC	PD-1/PD-L1	3.51086
P-0003024-T01-IM3	2	1	74	Male	Metastasis	BLCA	Combination	34.5726
P-0004693-T01-IM5	2	1	74	Female	Primary	NSCLC	PD-1/PD-L1	9.84
P-0011192-T01-IM5	2	0	74	Female	Metastasis	NSCLC	PD-1/PD-L1	10.82
P-0017263-T01-IM6	2	0	74	Male	Metastasis	CRC	PD-1/PD-L1	3.51086
P-0023779-T01-IM6	1.6	1	74	Male	Metastasis	NSCLC	PD-1/PD-L1	8.8
P-0018511-T01-IM6	1.2	1	74	Female	Metastasis	NSCLC	PD-1/PD-L1	8.8
P-0002456-T01-IM3	1	1	74	Female	Primary	SKCM	CTLA-4	7.81
P-0009431-T01-IM5	1	1	74	Female	Metastasis	NSCLC	PD-1/PD-L1	8.85
P-0024827-T01-IM6	1	0	74	Male	Primary	BLCA	PD-1/PD-L1	7.89943
P-0024339-T01-IM6	20.2303	0	74.1	Female	Primary	SKCM	PD-1/PD-L1	30.2644
P-0033935-T01-IM6	1.94079	0	74.2	Female	Primary	SKCM	PD-1/PD-L1	47.5584
P-0027104-T01-IM6	59.9013	1	74.5	Male	Metastasis	SKCM	PD-1/PD-L1	9.51168
P-0027270-T01-IM6	22.6974	0	74.5	Male	Metastasis	SKCM	PD-1/PD-L1	16.4293
P-0034392-T01-IM6	6.84211	0	74.5	Male	Primary	SKCM	PD-1/PD-L1	4.32349
P-0033151-T01-IM6	22.7303	0	74.7	Male	Metastasis	SKCM	PD-1/PD-L1	12.1058
P-0022366-T01-IM6	2.07237	0	74.7	Male	Primary	SKCM	PD-1/PD-L1	4.32349
P-0006407-T01-IM5	38.9803	0	74.8	Male	Metastasis	SKCM	PD-1/PD-L1	40.1275
P-0022795-T01-IM6	12.6974	1	74.9	Male	Primary	SKCM	PD-1/PD-L1	18.1587
P-0018679-T01-IM6	3.09211	0	74.9	Male	Metastasis	SKCM	PD-1/PD-L1	26.8056
P-0000697-T01-IM3	32	1	75	Female	Metastasis	SKCM	Combination	8.92
P-0010581-T01-IM5	30	0	75	Male	Metastasis	CRC	PD-1/PD-L1	66.8977
P-0006281-T01-IM5	28	0	75	Male	Metastasis	BLCA	Combination	24.5947
P-0004436-T01-IM5	24	1	75	Male	Primary	NSCLC	PD-1/PD-L1	5.9
P-0015649-T01-IM6	24	1	75	Male	Metastasis	BLCA	Combination	46.52
P-0008290-T01-IM5	23	0	75	Male	Metastasis	BLCA	PD-1/PD-L1	7.87031
P-0003670-T01-IM5	20	0	75	Female	Primary	NSCLC	PD-1/PD-L1	0.98
P-0004232-T01-IM5	18	1	75	Male	Primary	NSCLC	PD-1/PD-L1	6.89
P-0009168-T01-IM5	16.4	1	75	Male	Metastasis	NSCLC	PD-1/PD-L1	29.5
P-0003955-T01-IM3	15	1	75	Male	Primary	BLCA	PD-1/PD-L1	6.69146
P-0015955-T01-IM6	14	1	75	Female	Metastasis	NSCLC	PD-1/PD-L1	7.02
P-0019417-T01-IM6	14	1	75	Male	Metastasis	BLCA	PD-1/PD-L1	17.5543
P-0007493-T02-IM5	13	0	75	Male	Metastasis	NSCLC	PD-1/PD-L1	18.69
P-0015237-T01-IM6	12	0	75	Female	Metastasis	CRC	PD-1/PD-L1	52.6629
P-0039832-T01-IM6	11	0	75	Female	Metastasis	NSCLC	PD-1/PD-L1	12.3
P-0006641-T01-IM5	9	1	75	Female	Metastasis	HNSC	PD-1/PD-L1	4.91895
P-0014269-T01-IM6	9	1	75	Male	Metastasis	NSCLC	PD-1/PD-L1	0.88
P-0020592-T01-IM6	9	0	75	Male	Primary	BLCA	PD-1/PD-L1	7.02172
P-0029593-T01-IM6	8.7	1	75	Male	Metastasis	NSCLC	PD-1/PD-L1	10.5
P-0003069-T01-IM5	7	1	75	Female	Metastasis	SKCM	CTLA-4	35.42
P-0009521-T01-IM5	7	1	75	Female	Metastasis	Unknown	PD-1/PD-L1	1.96758
P-0022703-T01-IM6	6	0	75	Male	Metastasis	Unknown	PD-1/PD-L1	6.144
P-0008935-T01-IM5	5	1	75	Female	Metastasis	NSCLC	PD-1/PD-L1	10.82
P-0015663-T01-IM6	5	0	75	Female	Primary	BLCA	Combination	6.144
P-0023948-T01-IM6	4	0	75	Male	Metastasis	HNSC	PD-1/PD-L1	14.9212
P-0010613-T01-IM5	3	0	75	Female	Primary	BG	PD-1/PD-L1	9.84
P-0023015-T01-IM6	3	0	75	Male	Metastasis	HNSC	PD-1/PD-L1	7.02172
P-0022808-T01-IM6	2.8	1	75	Female	Metastasis	NSCLC	PD-1/PD-L1	5.3
P-0003543-T01-IM5	2	1	75	Male	Metastasis	EGC	PD-1/PD-L1	2.95137
P-0015122-T01-IM6	2	0	75	Female	Primary	SKCM	PD-1/PD-L1	10.53
[truncated: 350 more rows]

## Sheet: Table S2
Table S2 Mutational activities of detected seven mutational signatures based on somatic mutational profiles
Sample ID	Signature_1	Signature_2	Signature_3	Signature_6	Signature_8	Signature_10	Signature_17
P-0025245-T01-IM6	0.99996	1.21e-08	8.4e-09	1	4.05e-05	0	4.74e-14
P-0011357-T01-IM5	0.999985	5.93e-16	5.15e-25	1.73e-21	1.47e-05	1	2.71e-18
P-0010744-T01-IM5	0.999999	1.38e-06	1.7e-10	1	6.01e-08	0	3.14e-21
P-0010499-T01-IM5	9.04e-06	2.39e-15	6.35e-16	4.76e-15	0.000104608	1	0.999886
P-0010241-T01-IM5	0.989935	7.79e-10	0.000170947	1	0.00989405	0	4.88e-09
P-0021304-T01-IM6	1	1.45e-15	5.07e-17	1	1.14e-08	1.53e-29	7.48e-22
P-0016314-T01-IM6	1	4.77e-20	1.74e-08	1	3.86e-07	0	7.36e-16
P-0004011-T01-IM5	1	2.81e-11	3.7e-16	1	6.34e-09	1.45e-21	2.88e-20
P-0005021-T01-IM5	1	3.83e-10	2.77e-27	3.62e-17	6.53e-09	1	3.77e-23
P-0015344-T01-IM6	1	1.22e-10	7.39e-15	1	7.84e-08	9.22e-22	1.15e-19
P-0001808-T01-IM3	0.9839	1.73e-07	3.7e-16	7.95e-20	0.0161	1	9.97e-09
P-0003555-T01-IM5	0.999999	2.97e-12	4.95e-12	1	7.62e-07	0	5.42e-15
P-0004362-T01-IM5	1	4.42e-12	2.37e-12	1	4.42e-07	2.46e-24	3.53e-17
P-0003524-T01-IM5	0.999996	5.5e-08	1.95e-11	1	4.44e-06	1.22e-18	2.4e-14
P-0003650-T01-IM5	1	4.07e-10	3.72e-13	1	1.94e-07	1.78e-18	1.05e-16
P-0019475-T01-IM6	0.999962	1.54e-14	2.55e-07	1	3.74e-05	0	1.69e-12
P-0017697-T01-IM6	0.999979	8.07e-16	4.85e-11	1	2.11e-05	0	5.35e-17
P-0017986-T01-IM6	0.999938	9.87e-14	4.36e-11	1	6.21e-05	0	1.71e-15
P-0007997-T01-IM5	0.992128	1.39e-08	0.000137088	1	0.00773057	0	3.88e-06
P-0002049-T01-IM3	0.999916	2.85e-11	1.23e-09	1	8.44e-05	9.48e-20	1.29e-10
P-0025532-T01-IM6	0.999937	4.19e-10	1.35e-10	1	6.25e-05	0	5.88e-13
P-0005823-T01-IM5	0.999998	1.98e-14	1.33e-12	1	1.8e-06	0	4.32e-19
P-0022520-T01-IM6	0.999963	5.16e-11	1.95e-11	1	3.72e-05	1.33e-21	6.03e-16
P-0004783-T01-IM5	0.999068	4.29e-09	5.38e-08	1	0.000931564	0	5.26e-11
P-0013506-T01-IM5	0.999541	6.12e-08	2.29e-05	1	0.000435655	0	1.67e-12
P-0011071-T01-IM5	0.999768	3.31e-09	7.6e-07	1	0.000231363	0	5.34e-08
P-0004051-T01-IM5	0.985364	5.89e-07	8.23e-05	1	0.0145528	0	1.2e-07
P-0020252-T01-IM6	0.999318	3.84e-09	4.9e-08	1	0.00068187	0	1.04e-11
P-0009152-T01-IM5	0.999997	2.55e-09	1.43e-11	0.999999	3.08e-06	0	1.49e-14
P-0012249-T01-IM5	0.997195	1.52e-06	3.99e-05	0.999999	0.00276329	7.02e-13	1.15e-08
P-0010587-T01-IM5	1	5.82e-14	1.22e-14	0.999999	1.77e-07	3.13e-22	1.72e-18
P-0020399-T01-IM6	0.998079	9.56e-09	1.04e-05	0.999999	0.00191024	0	7.51e-08
P-0015573-T01-IM6	0.995006	0.00494808	7.86e-07	0.999998	4.5e-05	0	0
P-0015237-T01-IM6	0.982967	1.08e-07	8.48e-05	0.999998	0.0169485	0	1.55e-08
P-0013462-T01-IM5	0.94556	4.12e-07	0.0494846	0.999998	0.00441212	0	0.000542951
P-0010581-T01-IM5	0.997416	2.49e-10	9.81e-08	0.999994	0.00258362	0	2.19e-10
P-0030903-T01-IM6	0.831283	0.160289	7.66e-05	0.999647	0.00835083	0.000346889	0
P-0009830-T01-IM5	0.99852	2.2e-06	0.000254555	0.999988	0.00121957	0	3.98e-06
P-0011068-T01-IM5	0.99533	2.15e-06	0.000101353	0.999981	0.00456655	1.16e-10	1.51e-07
P-0007995-T01-IM5	0.868206	3.95e-05	0.0182547	0.99998	0.111533	0	0.0019669
P-0005151-T01-IM5	0.982047	1.57e-09	3.4e-05	0.999968	0.0179185	0	2.16e-07
P-0016522-T01-IM6	0.999946	1.42e-08	4.04e-09	0.999967	5.43e-05	2.15e-14	1.43e-12
P-0009057-T01-IM5	0.986065	2.97e-05	0.0061045	0.999941	0.00758009	0	0.000220328
P-0012115-T01-IM5	0.998187	3.53e-07	3.63e-05	0.999912	0.00177369	1.73e-11	3.08e-06
P-0009411-T01-IM5	0.998871	0.00107722	9.76e-07	0.999895	5.1e-05	0	2.3e-12
P-0017159-T01-IM6	0.997658	7.15e-07	1.84e-06	0.999865	0.00233986	2.69e-10	1.67e-08
P-0045298-T01-IM6	0.996768	2.21e-06	0.000212899	0.999849	0.00301662	0	3.62e-07
P-0008746-T01-IM5	0.999555	1.87e-08	1.92e-06	0.999809	0.000443094	8.52e-12	7.09e-09
P-0017370-T01-IM6	0.97722	3.35e-07	9.99e-05	0.999715	0.02268	0	1.78e-07
P-0019691-T01-IM6	0.926961	0.000133402	0.00422081	0.999665	0.0658741	0	0.00281048
P-0005842-T01-IM5	0.999873	1.18e-05	2.83e-08	0.999656	0.000114721	0	1.76e-10
P-0002633-T01-IM3	0.994957	0.000245463	9.15e-05	0.999512	0.00469652	0	9.91e-06
P-0009918-T01-IM5	0.999908	7.55e-11	2.02e-08	0.999411	9.2e-05	0	1.04e-12
P-0016181-T01-IM6	0.999796	1.33e-09	6.29e-08	0.999312	0.000203932	0	1.89e-14
P-0017512-T01-IM6	0.0168527	0.000113567	0.792593	0.999297	0.183241	0	0.00720004
P-0024068-T01-IM6	0.992692	3.66e-06	0.000670811	0.998974	0.00663042	0	3.58e-06
P-0019428-T01-IM6	0.99983	2.66e-07	1.45e-07	0.998731	0.000169238	0	4.03e-10
P-0023963-T01-IM6	0.997941	2.37e-05	1.04e-05	0.998578	0.00202481	0	1.71e-07
P-0015851-T01-IM6	0.992173	2.14e-06	4.35e-05	0.99854	0.00778152	0	3.01e-08
P-0009499-T01-IM5	0.99862	0.000167369	0.000218625	0.997881	0.000993947	0	2.57e-10
P-0008188-T01-IM5	0.985368	4.67e-07	0.000407213	0.997466	0.0141436	0	8.03e-05
P-0014148-T01-IM5	0.98937	0.00866626	5.34e-05	0.997398	0.00191044	0	1.87e-08
P-0001420-T01-IM3	0.971128	0.00479672	0.00788675	0.996912	0.0161886	0	3.11e-07
P-0009706-T01-IM5	0.534007	0.000267698	0.21341	0.9949	0.182384	0.0017796	0.0699305
P-0024243-T01-IM6	0.998403	8.25e-07	4e-06	0.995598	0.00159214	0	1.7e-08
P-0019599-T01-IM6	0.853644	0.145498	0.000462619	0.994833	0.000363994	0	3.11e-05
P-0014323-T01-IM6	0.949125	0.00104535	0.0117583	0.992571	0.0376879	0	0.000383334
P-0019413-T01-IM6	0.590952	0.0187243	0.265702	0.991689	0.0878564	0	0.0367645
P-0002490-T01-IM3	0.467883	0.532117	1.29e-12	0.990423	2.74e-10	5.1e-33	0
P-0012865-T01-IM5	0.674489	0.324319	0.000333463	0.989011	0.000790348	0	6.85e-05
P-0018783-T01-IM6	0.613875	0.385648	0.000198042	0.98649	0.000279025	0	0
P-0013232-T01-IM5	0.341127	0.658868	1.13e-06	0.985134	3.18e-06	0	0
P-0004494-T01-IM5	0.951722	0.0166415	0.00457301	0.964653	0.0270634	0.0193492	0
P-0004527-T01-IM5	0.06605	0.00194471	0.335326	0.983388	0.0272897	0	0.569389
P-0017047-T01-IM6	0.569677	0.430152	0.000147291	0.982396	2.26e-05	0	4.48e-07
P-0001882-T01-IM3	0.935195	0.0456376	0.0065497	0.975903	0.0126129	0	4.48e-06
P-0015456-T01-IM6	0.712622	0.0371814	0.151988	0.975473	0.0867186	0	0.0114894
P-0006055-T01-IM5	0.399372	0.0191657	0.40002	0.975187	0.161404	0	0.0200392
P-0016782-T01-IM6	0.716187	0.000181645	0.0969778	0.973006	0.186633	0	2.09e-05
P-0015827-T01-IM6	0.162591	0.829329	0.00214881	0.970759	0.000169052	0	0.00576188
P-0000740-T01-IM3	0.698603	0.0170287	0.128749	0.96971	0.0918831	0	0.0637359
P-0005500-T01-IM5	0.982777	0.000144581	0.00155549	0.969186	0.0152942	2.42e-05	0.000229044
P-0001693-T02-IM3	0.675795	0.00465803	0.0204575	0.964177	0.282848	0	0.0162405
P-0005725-T01-IM5	0.0964044	0.900985	0.00220053	0.963833	0.000329202	2.4e-09	8.05e-05
P-0017830-T01-IM6	0.00140568	0.998594	2.43e-09	0.959867	8.76e-12	0	0
P-0027104-T01-IM6	0.53702	0.0206409	0.325234	0.953849	0.0745775	0.00554607	0.0425274
P-0005635-T01-IM5	0.7405	0.0170606	0.142895	0.955918	0.0875385	0	0.0120064
P-0018059-T01-IM6	0.54533	0.453266	0.000239469	0.955702	0.00116461	1.94e-09	0
P-0005132-T01-IM5	0.541864	0.00665689	0.206411	0.95317	0.161242	0	0.0838261
P-0026114-T01-IM6	0.648989	0.0268551	0.161308	0.952467	0.151686	0	0.0111621
P-0000977-T01-IM3	0.781024	0.0171484	0.0836838	0.951247	0.0989702	0	0.0191733
P-0026350-T01-IM6	0.386793	0.613202	6.01e-07	0.943462	4.19e-06	0	0
P-0033378-T01-IM6	0.990001	0.00999667	1.47e-07	0.936671	2.33e-06	0	7.34e-12
P-0029593-T01-IM6	0.508717	0.249336	0.189744	0.936385	0.0505733	0	0.00162918
P-0009517-T01-IM5	0.67646	0.0411404	0.165532	0.93352	0.102863	0.00168233	0.0140055
P-0010063-T01-IM5	0.625335	0.0178692	0.209984	0.931839	0.138658	0	0.00815307
P-0010355-T01-IM5	0.443741	0.0359748	0.374407	0.929352	0.0941	0	0.0517766
P-0019909-T02-IM6	0.726583	0.0271315	0.155157	0.926267	0.0897251	0	0.00140257
P-0018986-T01-IM6	0.645634	0.0367817	0.0194241	0.922209	0.250509	0.00171831	0.0476508
P-0014182-T01-IM6	0.670479	0.14104	0.100765	0.859396	0.0784849	0.0615001	0.00923069
P-0020288-T03-IM6	0.561317	0.434427	0.00138374	0.919534	0.00276171	0	0.000110834
P-0014600-T01-IM6	0.412845	0.0707823	0.390253	0.91697	0.0697181	0	0.0564014
P-0016233-T01-IM6	0.448222	0.0138409	0.37303	0.915686	0.107592	0	0.0573146
P-0006848-T01-IM5	0.506355	0.00851103	0.314565	0.914509	0.112461	0	0.0581081
P-0006026-T01-IM5	0.892718	0.0134627	0.0231361	0.893711	0.0666395	0.0196297	0.00404372
P-0009347-T01-IM5	0.463796	0.0085785	0.209326	0.91295	0.231613	0	0.0866866
P-0003157-T01-IM5	0.298648	0.0149366	0.427727	0.908563	0.0570528	0	0.201636
P-0016853-T02-IM6	0.205331	0.761084	0.0245417	0.904666	0.00279816	0.000132235	0.00624548
P-0005947-T01-IM5	0.978117	0.00065546	0.000836945	0.902458	0.0203639	0	2.71e-05
P-0022019-T01-IM6	0.00434725	0.995653	7.62e-15	0.902353	2.54e-15	0	4.19e-24
P-0022795-T01-IM6	0.886404	0.0357605	0.0164965	0.89893	0.0591296	0	0.00220986
P-0006294-T01-IM5	0.24921	0.00798312	0.598634	0.89796	0.0864305	0	0.0577419
P-0018925-T01-IM6	0.991369	0.00482026	8.77e-05	0.895172	0.00371587	0	6.81e-06
P-0001904-T01-IM3	0.617431	0.0204181	0.24842	0.894756	0.0975252	0	0.0162056
P-0009336-T01-IM5	0.236391	0.00824088	0.560089	0.887663	0.170368	0	0.0249109
P-0002456-T01-IM3	0.296282	0.0408364	0.571723	0.885559	0.0475816	0	0.0435773
P-0012728-T01-IM5	0.972486	0.00418445	0.00140145	0.88543	0.021787	0.000103388	0.000140979
P-0015122-T01-IM6	0.558332	0.0642131	0.177086	0.883369	0.168303	0	0.032066
P-0022033-T01-IM6	0.0958077	0.0357981	0.657164	0.88055	0.124788	0	0.0864419
P-0018517-T01-IM6	0.4423	0.0194578	0.375627	0.879088	0.116859	0	0.0457565
P-0006587-T01-IM5	0.928724	0.0271349	0.00467124	0.876065	0.0387651	0	0.000704408
P-0030290-T01-IM6	0.00147595	0.998524	1.5e-10	0.871089	1.39e-12	4.29e-35	5.69e-18
P-0008009-T01-IM5	0.855853	0.0280277	0.0630735	0.869303	0.0510716	0	0.00197385
P-0009189-T01-IM5	0.910259	0.0892594	2.29e-05	0.868528	0.000458835	0	1.11e-07
P-0034283-T01-IM6	0.0158075	0.984117	7.37e-05	0.865336	9.14e-07	0	6.14e-07
P-0020319-T01-IM6	0.0799181	0.913405	0.00642495	0.865275	0.000175003	0	7.68e-05
P-0000940-T01-IM3	0.529703	0.0170537	0.0456583	0.79295	0.304808	0.0712532	0.102778
P-0019710-T01-IM6	0.764996	0.0124818	0.0767384	0.86274	0.142002	0	0.00378236
P-0005129-T01-IM5	0.644563	0.194299	0.0898471	0.692377	0.0566239	0.166038	0.0146672
P-0017215-T01-IM5	0.935892	0.0272685	0.019039	0.856801	0.0177474	0	5.31e-05
P-0013243-T01-IM5	0.598625	0.0415152	0.209515	0.853759	0.110632	0	0.0397126
P-0001901-T01-IM3	0.512172	0.451379	0.0205511	0.852275	0.0158979	1.19e-05	0
P-0020011-T01-IM6	0.205566	0.00312754	0.3773	0.849409	0.11464	0.000614792	0.299366
P-0007693-T01-IM5	0.645559	0.0945559	0.134633	0.845587	0.0956531	0	0.0295985
P-0036089-T01-IM6	0.671755	0.0135593	0.228708	0.84185	0.0808716	0	0.00510671
P-0001706-T01-IM3	0.427431	0.565855	0.00332097	0.839136	0.00339288	0	0
P-0020770-T01-IM6	0.878498	0.020273	0.0209167	0.824447	0.0770887	0.0146307	0.00322315
P-0002905-T01-IM3	0.444134	0.012451	0.377017	0.838856	0.130902	0	0.0354959
P-0013343-T01-IM5	0.476031	0.497699	0.0170715	0.834282	0.00919806	0	0
P-0015745-T01-IM6	0.660184	0.0923189	0.116538	0.832156	0.0840561	0	0.0469028
P-0016614-T01-IM6	0.600795	0.00961436	0.258343	0.832026	0.120833	0	0.0104136
P-0013383-T01-IM5	0.271797	0.728173	1.45e-05	0.831104	1.56e-05	0	0
P-0013659-T01-IM5	0.472655	0.0619467	0.102684	0.824103	0.191948	0.00634103	0.170766
P-0012189-T01-IM5	0.52837	0.043254	0.108725	0.755757	0.107511	0.0745807	0.21214
P-0018340-T01-IM6	0.867837	0.02223	0.0220913	0.815838	0.0842914	0.0121878	0.00354979
P-0022542-T02-IM6	0.837121	0.0358475	0.0192234	0.827312	0.103723	7.19e-05	0.00408428
P-0006672-T01-IM5	0.60872	0.0117627	0.19532	0.823011	0.152228	0	0.0319688
P-0037408-T01-IM6	0.000361525	0.999638	3.85e-08	0.821266	3.94e-11	3.27e-18	0
P-0006155-T02-IM5	0.0664792	0.933521	4.81e-08	0.817408	6.18e-08	0	5e-11
P-0000894-T01-IM3	0.516648	0.121344	0.216137	0.815981	0.0936242	0	0.0522464
P-0004257-T01-IM5	0.548276	0.108982	0.235307	0.813197	0.0715387	0	0.0358974
P-0014565-T01-IM6	0.629572	0.0216447	0.171044	0.811084	0.151676	0	0.0260636
P-0015526-T01-IM6	0.0377051	0.961745	0.000451686	0.810476	8.22e-05	0	1.62e-05
P-0021255-T01-IM6	0.0293035	0.692702	0.273662	0.808589	0.00144203	0	0.00289028
P-0013180-T01-IM5	0.495693	0.409621	0.0547685	0.806329	0.0296695	0	0.0102482
P-0006621-T01-IM5	0.285252	0.7147	8.14e-07	0.799855	4.71e-05	0	7.86e-09
P-0006414-T01-IM5	0.567017	0.0165506	0.219386	0.798507	0.126406	0	0.0706397
P-0037118-T01-IM6	0.294098	0.641993	0.0551562	0.7985	0.00810187	0	0.000651178
P-0005929-T01-IM5	0.321123	0.00800719	0.518625	0.794512	0.123959	0.00258431	0.0282856
P-0002157-T01-IM3	0.782894	0.14159	0.0357994	0.790018	0.0391588	3.03e-05	0.000557238
P-0022703-T01-IM6	0.446874	0.105934	0.286788	0.789435	0.0647071	0	0.0956975
P-0015694-T01-IM6	0.713324	0.262017	0.0112201	0.787466	0.0134392	0	0
P-0008246-T02-IM5	0.000481826	0.999518	7.74e-09	0.787174	3.81e-12	3.72e-23	0
P-0004020-T01-IM5	0.139952	0.0319683	0.714928	0.784142	0.0903196	0	0.0228319
P-0021911-T01-IM6	0.582041	0.248509	0.0942791	0.770591	0.0751705	0.0122516	0
P-0013030-T02-IM6	0.0632514	0.936747	1.03e-06	0.782285	9.37e-07	3.39e-11	4.53e-10
P-0007544-T01-IM5	0.868492	0.131461	3.3e-07	0.777324	4.68e-05	0	0
P-0023356-T01-IM6	0.107609	0.892355	6.01e-06	0.771571	3.04e-05	4.53e-13	4.23e-08
P-0021993-T01-IM6	0.395627	0.0158266	0.310459	0.771508	0.136679	0	0.141408
P-0023821-T01-IM6	0.838122	0.0408269	0.0492467	0.770509	0.0712385	0	0.000565924
P-0008522-T01-IM5	0.422547	0.0184838	0.340017	0.765424	0.157466	0	0.0614865
P-0035974-T01-IM6	0.802531	0.197329	5.84e-05	0.754593	8.17e-05	0	1.26e-08
P-0004914-T01-IM5	0.52254	0.444724	0.0121838	0.753613	0.019605	0	0.000947577
P-0005053-T01-IM5	0.199208	0.73269	0.0558232	0.75203	0.00914509	0	0.00313382
P-0004099-T01-IM5	0.0356428	0.000239774	0.908584	0.748954	0.0385639	0	0.0169697
P-0032185-T01-IM6	0.0261671	0.973832	1.12e-06	0.747955	3.11e-08	0	0
P-0004561-T01-IM5	0.2754	0.0177445	0.586128	0.746365	0.107486	0	0.0132412
P-0026892-T01-IM6	0.524701	0.327195	0.0743174	0.739987	0.0466295	0	0.0271576
P-0002042-T01-IM3	0.85131	0.00543648	0.0433035	0.739408	0.0984618	0	0.00148843
P-0023032-T01-IM6	0.85487	0.04704	0.0405522	0.738099	0.0567886	0	0.000749197
P-0007583-T01-IM5	0.040659	0.000112047	0.749768	0.725599	0.207347	0	0.00211337
P-0035224-T01-IM6	1.73e-05	0.999983	2.97e-10	0.721366	1.74e-15	0	1.13e-16
P-0028849-T02-IM6	0.810589	0.0017325	0.13198	0.720149	0.0552032	0	0.000495258
P-0009924-T01-IM5	0.0968524	2.51e-05	0.61117	0.716536	0.289743	0	0.0022097
P-0021622-T01-IM6	0.042342	0.543094	0.406164	0.713412	0.00840054	0	0
P-0029504-T01-IM6	1.78e-06	0.999998	2.1e-20	0.712058	8.11e-25	0	0
P-0007961-T02-IM5	0.545581	0.00786385	0.334679	0.708117	0.108406	0	0.00346998
P-0014328-T01-IM6	0.594996	0.0404471	0.221079	0.681918	0.107996	0.0256412	0.0354823
P-0005604-T01-IM5	0.55359	0.0575762	0.261915	0.706398	0.0947009	0	0.0322176
P-0034034-T01-IM6	0.257148	0.570401	0.0995936	0.449176	0.0360457	0.253403	0.0368117
P-0001361-T01-IM3	0.641245	0.353585	0.00234353	0.702451	0.00254267	0	0.000283822
P-0017048-T01-IM6	0.539458	0.128132	0.190645	0.700885	0.122747	0	0.019018
P-0012866-T01-IM5	0.454431	0.0132111	0.358374	0.698679	0.14796	0	0.0260237
P-0004803-T01-IM5	0.164898	0.00223642	0.183407	0.695004	0.554767	0.00220892	0.0946913
P-0027227-T01-IM6	0.760618	0.0808612	0.103987	0.696907	0.0530843	0	0.00144942
P-0000299-T01-IM3	0.0635353	0.00146438	0.846602	0.696617	0.0619302	0	0.0264681
P-0003069-T01-IM5	0.111277	0.884502	0.00393034	0.695989	0.000280471	0	9.83e-06
P-0000697-T01-IM3	0.564459	0.0221814	0.290932	0.695442	0.116078	0	0.0063491
P-0011288-T01-IM5	0.880236	0.0105878	0.0129971	0.690772	0.0955822	0.00162942	0.000596636
P-0020169-T01-IM6	0.826424	0.0155367	0.0323703	0.674458	0.120776	0.0127297	0.00489348
P-0013318-T01-IM5	0.259808	0.12136	0.366526	0.366031	0.150578	0.320764	0.101728
P-0039410-T01-IM6	0.666876	0.110303	0.149854	0.684698	0.0631221	0	0.00984542
P-0029544-T01-IM6	0.477715	0.113745	0.293501	0.678583	0.0690815	0	0.0459579
P-0008946-T01-IM5	0.803476	0.175005	0.00185337	0.673254	0.0196662	0.00229373	0
P-0033950-T01-IM6	0.699714	0.173608	0.0615063	0.6623	0.0651715	0.0122676	0
P-0023794-T01-IM6	0.476756	0.4416	0.0520744	0.670907	0.0203989	0.000141411	0.00917061
P-0001093-T01-IM3	0.639335	0.00816715	0.181133	0.640457	0.149618	0.0301355	0.0217472
P-0027154-T01-IM6	0.417438	0.543471	0.0183126	0.59761	0.0207788	0.0727789	0
P-0012869-T01-IM5	0.638883	0.113424	0.140364	0.669371	0.0914514	0	0.0158788
P-0022012-T01-IM6	0.420046	0.170654	0.257766	0.304138	0.151534	0.363844	0
P-0040265-T01-IM6	0.723656	0.219933	0.0116554	0.604927	0.0447556	0.0611045	0
P-0008765-T01-IM5	0.461484	0.015469	0.399238	0.663147	0.107932	0	0.0158775
P-0002794-T02-IM5	0.0358786	0	0.305742	0.630321	0.414901	0.0295281	0.243479
P-0013204-T01-IM5	0.50491	0.0528631	0.282925	0.659702	0.134641	0	0.0246617
P-0018277-T01-IM6	0.852444	0.0442831	0.0435949	0.656889	0.0567318	0	0.00294597
P-0010340-T01-IM5	0.382413	0.617564	5.45e-06	0.655114	1.84e-05	0	0
P-0009119-T01-IM5	0.690458	0.200742	0.0388445	0.646429	0.0506381	0	0.0193172
P-0029989-T01-IM6	0.583014	0.070489	0.240133	0.644141	0.101791	0	0.00457276
P-0026030-T01-IM6	0.580332	0.403553	0.00997095	0.642342	0.00607701	0	6.77e-05
P-0039629-T01-IM6	0.422021	0.255896	0.208099	0.641235	0.0821505	0	0.0318341
P-0013354-T01-IM5	0.285899	0.0161876	0.408562	0.63733	0.112657	0	0.176694
P-0008728-T01-IM5	0.415288	0.57383	0.00270702	0.637202	0.00738286	0	0.000792398
P-0002917-T01-IM3	0.0912404	0.00187157	0.380335	0.633295	0.217001	0	0.309552
P-0012968-T01-IM5	0.624082	0.19077	0.120631	0.632266	0.0527008	0	0.0118157
P-0002305-T01-IM3	0.553698	0.147063	0.160531	0.631742	0.118337	0	0.0203712
P-0025530-T01-IM6	0.246126	0.0154375	0.459384	0.630922	0.154724	0	0.124329
P-0004742-T01-IM5	0.204076	0.468558	0.297873	0.625677	0.0294931	0	0
P-0013347-T01-IM5	0.681559	0.0817855	0.0486989	0.623347	0.127837	0	0.0601191
P-0000071-T01-IM3	0.0743339	0.150567	0.758241	0.620865	0.0136942	0	0.00316344
P-0015085-T01-IM6	0.54914	0.226486	0.132713	0.61874	0.0667629	0	0.024897
P-0025720-T01-IM6	0.655229	0.0504467	0.145801	0.618386	0.129174	0	0.0193498
P-0005201-T01-IM5	0.388698	0.549488	0.0303551	0.484065	0.031459	0.134243	0
P-0023966-T01-IM6	0.796462	0.165589	0.0128039	0.618261	0.0211685	0	0.00397657
P-0015612-T01-IM6	0.853599	0.101438	0.00680634	0.617769	0.0381568	0	0
P-0008733-T01-IM5	0.418115	0.0117431	0.475557	0.611805	0.0824163	0	0.012169
P-0006500-T01-IM5	0.661707	0.0523489	0.176427	0.603798	0.0962987	0.00657799	0.0132175
P-0017635-T01-IM5	0.225697	0.652754	0.0635473	0.343164	0.0313031	0.266624	0.0266982
P-0019272-T01-IM6	0.347168	0.0183771	0.247334	0.508855	0.331562	0.0996666	0.0555587
P-0023603-T01-IM6	0.415697	0.171262	0.195074	0.389341	0.191245	0.217987	0.0267216
P-0037685-T01-IM6	0.116446	0.872712	0.00864833	0.605397	0.00151929	0.000514749	0.000674154
P-0013094-T01-IM5	0.246117	0.511145	0.137132	0.593045	0.0273617	0.00358852	0.0782438
P-0003521-T02-IM5	0.407155	0.00851405	0.395086	0.59644	0.116932	0	0.0723131
P-0009311-T01-IM5	0.452471	0.504892	0.03534	0.588553	0.00492076	0	0.00237622
P-0026015-T01-IM6	0.337271	0.0439534	0.483862	0.584399	0.0802031	0	0.0547112
P-0016800-T01-IM6	0.43586	0.317279	0.145068	0.497383	0.0609774	0.0865923	0.040816
P-0025917-T02-IM6	0.0453607	8.54e-07	0.872344	0.583326	0.081685	0	0.000609342
P-0015987-T01-IM6	0.121621	0.000878614	0.643811	0.581785	0.187263	0	0.0464258
P-0026314-T01-IM6	0.695863	0.0918167	0.102344	0.570702	0.0935424	0.0088326	0.0164335
P-0025831-T01-IM6	0.709293	0.223139	0.0413228	0.576464	0.0246232	0	0.00162203
P-0016328-T01-IM6	0.582852	0.348496	0.0332121	0.575595	0.0333689	0	0.00207081
P-0014071-T01-IM5	0.459978	0.0117315	0.429249	0.575402	0.086818	0	0.0122237
P-0024054-T01-IM6	0.229201	0.442402	0.187216	0.562862	0.0437865	0	0.0973951
P-0015905-T01-IM6	0.469547	0.0172585	0.346564	0.552214	0.142976	0	0.0236532
P-0017966-T01-IM6	0.790628	0.114973	0.0113782	0.550113	0.0777307	0.00162687	0.00529042
P-0014220-T01-IM6	0.117369	0.0138407	0.265996	0.522767	0.0853406	0.0249748	0.517454
P-0006535-T01-IM5	0.355089	0.00893132	0.47589	0.547117	0.155308	0	0.00478163
P-0022570-T01-IM6	0.509424	0.344338	0.102029	0.546974	0.0442085	0	0
P-0024301-T01-IM6	0.607285	0.066155	0.182491	0.545267	0.128948	0	0.0151214
P-0034908-T01-IM6	0.408798	0.0181909	0.390011	0.542974	0.123916	0	0.0590854
P-0006796-T01-IM5	0.207598	0.791501	0.000476031	0.54064	0.000423124	0	2.29e-06
P-0009297-T01-IM5	0.537466	0.0149952	0.307851	0.540086	0.132518	0	0.00716956
P-0012840-T01-IM5	0.741368	0.103601	0.0541	0.535017	0.0903761	0	0.0105549
P-0001170-T01-IM3	0.852878	0.0831737	0.00899385	0.503865	0.0549547	0.0289027	0
P-0023777-T01-IM6	0.40934	0.590639	1.24e-05	0.531554	8.45e-06	0	0
P-0006800-T01-IM5	0.68153	0.0278312	0.149779	0.528679	0.136312	0	0.00454798
P-0005750-T01-IM5	0.478047	0.0135018	0.258662	0.527459	0.131088	0	0.118701
P-0008439-T01-IM5	0.468429	0.449022	0.0459782	0.526969	0.0309131	0	0.00565788
P-0015648-T01-IM6	0.776817	0.0221865	0.0765157	0.522036	0.117926	0	0.00655503
P-0021223-T01-IM6	0.00106875	0.998928	3.36e-06	0.520017	1.18e-08	5.31e-12	1.14e-10
P-0039426-T01-IM6	0.0294898	0.967552	0.00269289	0.516848	6.79e-05	0	0.000197649
P-0012256-T01-IM5	0.398361	0.0204013	0.325722	0.516811	0.199174	0	0.056343
P-0016256-T01-IM6	0.313539	0.315139	0.301517	0.511322	0.0698052	0	0
P-0008061-T01-IM5	0.595521	0.00837089	0.174414	0.510219	0.127804	0	0.0938895
P-0013087-T01-IM5	0.249289	0.116569	0.479146	0.316258	0.0814091	0.192519	0.0735868
P-0018759-T01-IM6	0.386496	0.434262	0.136804	0.507131	0.0310808	0	0.0113574
P-0016875-T01-IM6	0.407449	0.0183001	0.433854	0.506387	0.102215	0	0.0381825
P-0032896-T01-IM6	0.412656	0.537491	0.0233741	0.503166	0.0195111	0.00294971	0.00696788
P-0004132-T01-IM5	0.483855	0.0670826	0.32396	0.498163	0.0922927	0	0.0328088
P-0024205-T01-IM6	0.341641	0.057296	0.331377	0.494634	0.155667	0	0.114018
P-0015697-T01-IM6	0.549714	0.408885	0.0112847	0.49189	0.0288611	0	0.00125537
P-0008187-T01-IM5	0.30065	0.0165297	0.27701	0.485234	0.222625	0.00512134	0.183185
P-0002507-T01-IM3	0.242088	0.064837	0.314812	0.489568	0.0986585	0	0.279605
P-0021842-T01-IM6	0.654371	0.049486	0.160073	0.489162	0.050455	0	0.0856148
P-0013166-T01-IM5	0.146335	0.853505	0.000133235	0.487431	2.67e-05	0	0
P-0006084-T01-IM5	0.424928	0.0180047	0.271142	0.467989	0.252121	0.0189704	0.0338038
P-0015791-T01-IM6	0.199481	0.0735249	0.632618	0.484957	0.0621022	0	0.0322735
P-0000749-T01-IM3	0.254083	0.156222	0.0812494	0.484594	0.0772607	0	0.431186
P-0027716-T01-IM6	0.0249712	0.974775	0.000231248	0.48459	2.11e-05	5.05e-10	1.17e-06
P-0024731-T01-IM6	0.79577	0.204223	2.76e-08	0.484142	7.74e-06	0	0
P-0032845-T01-IM6	0.478205	0.501785	0.0122271	0.481097	0.00597449	7.61e-06	0.00180824
P-0008062-T01-IM5	0.549332	0.13947	0.177091	0.444577	0.103919	0.0354343	0.0301871
P-0024386-T01-IM6	0.0554847	0.000608714	0.885635	0.479152	0.0488423	0	0.00942914
P-0006641-T01-IM5	0.650085	0.134197	0.105881	0.155506	0.109837	0.3224	0
P-0001538-T01-IM3	0.549682	0.0395164	0.217649	0.476812	0.157897	0	0.0352552
P-0028205-T01-IM6	0.038574	0.961292	0.000123839	0.469656	1.03e-05	8.97e-11	0
P-0017702-T01-IM6	0.510709	0.487978	0.000701694	0.46773	0.000611582	0	0
P-0025394-T01-IM6	0.436712	0.0134545	0.203501	0.464141	0.282791	0	0.0635403
P-0013920-T01-IM5	0.368553	0.0133982	0.482335	0.46301	0.12159	0	0.0141243
P-0005109-T01-IM5	0.295654	0.675545	0.0220125	0.463005	0.00678842	0	0
P-0004827-T01-IM5	0.258383	0.176044	0.413045	0.45773	0.0997812	0.00511568	0.052746
P-0005673-T01-IM5	0.505553	0.178115	0.253095	0.462638	0.0502757	0	0.0129622
P-0032800-T01-IM6	0.243774	0.753992	0.00130367	0.456025	0.000905235	5.27e-07	2.55e-05
P-0023378-T01-IM6	0.881612	0.062861	0.0142198	0.454919	0.0409852	0	0.00032223
P-0005421-T01-IM5	0.41493	0.537478	0.0248328	0.452571	0.0197734	0.000788153	0.00298636
P-0005534-T01-IM5	0.709385	0.0523908	0.108409	0.452723	0.114037	0	0.0157777
P-0034370-T01-IM6	0.418036	0.554546	0.0110263	0.440426	0.015306	0.0122376	0.00108551
P-0025541-T01-IM6	0.835823	0.0172489	0.0703929	0.451928	0.0755485	0	0.000986628
P-0022177-T01-IM6	0.514799	0.0309914	0.317989	0.450741	0.115206	0	0.0210144
P-0028930-T01-IM6	0.129999	0.00552202	0.600448	0.450459	0.159783	0	0.104248
P-0026789-T01-IM6	0.310347	0.647153	0.0283071	0.449064	0.00984248	0	0.0043497
P-0026715-T01-IM6	0.361165	0.298733	0.239431	0.44347	0.0633353	0	0.0373356
P-0038799-T01-IM6	0.791475	0.193443	0.00338704	0.442584	0.00827812	0	0.00341614
P-0011269-T01-IM5	0.161423	0.83772	0.000612503	0.44253	0.000241424	0	3.85e-06
P-0007736-T01-IM5	0.797868	0.0774882	0.0399116	0.4424	0.077641	0	0.00709151
P-0033003-T01-IM6	0.00535027	0.99465	2.38e-08	0.44143	1.18e-09	2.27e-20	1.19e-14
P-0019239-T01-IM6	0.313197	0.584549	0.0669842	0.439372	0.0266386	0.00193579	0.00863182
P-0017044-T01-IM6	0.16877	0.498891	0.0734304	0.182109	0.0276628	0.258544	0.231246
P-0000721-T01-IM3	0.751742	0.0225986	0.10629	0.440596	0.112046	0	0.00732445
P-0017744-T01-IM6	0.510793	0.44347	0.0264842	0.439365	0.019253	0.000265353	0
P-0003728-T01-IM5	0.0136636	0.986328	7.65e-06	0.438197	2.64e-07	1.41e-13	3.84e-08
P-0005383-T01-IM5	0.767965	0.185854	0.00898402	0.434268	0.0371967	0	0
P-0003966-T01-IM5	0.523829	0.0898712	0.2858	0.429698	0.0871904	0	0.0133097
P-0003358-T01-IM5	0.381406	0.0140709	0.400789	0.429363	0.181566	0	0.0221688
P-0007084-T02-IM5	0.483354	0.00382616	0.296875	0.428713	0.183875	0	0.0320698
P-0016720-T01-IM6	0.508749	0.185951	0.173207	0.420473	0.0925308	0.00705798	0.0395616
P-0006034-T01-IM5	0.912295	0.0845747	0.000867362	0.425947	0.00226216	0	3.92e-07
P-0015142-T01-IM6	0.439608	0.42803	0.0693116	0.374955	0.0486849	0.0426861	0.0143652
P-0003097-T01-IM5	0.327366	0.205818	0.344583	0.416994	0.0781595	0	0.0440737
P-0024994-T01-IM6	0.351389	0.0420147	0.443412	0.415271	0.12857	0	0.0346143
P-0033965-T01-IM6	0.130242	0.843187	0.0241107	0.413922	0.00246002	0	0
P-0015881-T03-IM6	0.529498	0.466737	0.00147471	0.412685	0.00229024	0	0
P-0010213-T01-IM5	0.130079	0.000273972	0.347111	0.409459	0.476406	0	0.0461304
P-0010501-T01-IM5	0.525867	0.257809	0.13955	0.40633	0.059341	0.00148749	0.0174328
P-0005352-T01-IM5	0.52725	0.287212	0.104001	0.406174	0.0380345	0	0.0435027
P-0029975-T01-IM6	0.202714	0.030708	0.531834	0.403794	0.0385552	0	0.196189
P-0018819-T01-IM6	0.475372	0.399989	0.0543126	0.379579	0.0498479	0.0235986	0.0204786
P-0019379-T01-IM6	0.477395	0.386923	0.00937203	0.402787	0.10081	4.83e-06	0.0255009
P-0011036-T01-IM5	0.738112	0.0127387	0.0733194	0.402389	0.173321	0.000365904	0.00250932
P-0036680-T01-IM6	0.653853	0.0628217	0.152447	0.402164	0.119385	0	0.0114931
P-0039179-T01-IM6	2.19e-09	1	1.88e-17	0.400224	4.49e-25	6.22e-45	0
P-0015007-T01-IM6	0.434157	0.138528	0.295626	0.400177	0.113513	0	0.0181754
P-0021846-T01-IM6	0.975594	0.0013376	0.00286166	0.398789	0.0201713	0	3.53e-05
P-0005260-T01-IM5	0.702257	0.133737	0.0728352	0.398682	0.0911712	0	0
P-0012783-T01-IM5	0.633471	0.196746	0.12857	0.398424	0.0361845	0	0.00502891
P-0036873-T01-IM6	0.649306	0.218945	0.0514234	0.376628	0.0565938	0.0203649	0.0237321
P-0013356-T01-IM5	0.584406	0.414459	0.000217396	0.392593	0.000917512	0	0
P-0002646-T01-IM3	0.361235	0.0359289	0.450239	0.378904	0.0951063	0.0129981	0.0574907
P-0009105-T01-IM5	0.10107	0.882419	0.0152164	0.387925	0.00102608	0	0.000268037
P-0024121-T01-IM6	0.0222206	0.977779	4.46e-07	0.385552	8.61e-08	0	0
P-0023260-T01-IM6	0.187785	0.0056699	0.661977	0.385302	0.118568	0	0.0259992
P-0018557-T01-IM6	0.206404	0.256126	0.338172	0.384234	0.0508732	0	0.148426
P-0015855-T01-IM6	0.227867	0.709387	0.0399569	0.341782	0.0152945	0.0391204	0.00749447
P-0017690-T04-IM6	0.577161	0.335881	0.0487644	0.380435	0.0381937	0	0
P-0000686-T01-IM3	0.00421652	0.995783	6.71e-15	0.378717	6.73e-16	0	1.4e-28
P-0003967-T01-IM5	0.185968	0.00901595	0.615744	0.374582	0.137565	0	0.0517074
P-0023775-T01-IM6	0.66924	0.0737878	0.141009	0.374403	0.105463	0	0.010501
P-0038967-T01-IM6	0.31512	0.140803	0.345151	0.332335	0.129322	0.0414623	0.0696025
P-0023464-T01-IM6	0.512494	0.00458768	0.319807	0.372282	0.15997	0	0.00314112
P-0009080-T01-IM5	0.285172	0.0117458	0.419465	0.370582	0.126066	0	0.157552
P-0024188-T01-IM6	0.0265445	0.972756	0.00063656	0.366645	5.9e-05	4.74e-05	3.93e-06
P-0022042-T01-IM6	0.226278	0.75985	0.010451	0.365224	0.00294191	0	0.000478727
P-0008422-T03-IM6	0.323647	0.0695716	0.253494	0.325557	0.0872354	0.0389333	0.266052
P-0023128-T01-IM6	0.373237	0.00175739	0.0789709	0.362972	0.116125	0.000863783	0.42991
P-0023023-T01-IM6	0.50825	0.18817	0.156948	0.363511	0.127432	0	0.0191999
P-0027346-T01-IM6	0.626161	0.0857153	0.156297	0.361189	0.116029	0	0.0157975
P-0009177-T01-IM5	0.661178	0.0270555	0.163686	0.359511	0.135646	0	0.0124345
P-0003868-T01-IM5	0.225642	0.38696	0.33818	0.358861	0.0399878	0	0.00923095
P-0003757-T01-IM5	0.561003	0.163442	0.211267	0.352014	0.0511414	0.00343982	0.0131462
P-0033782-T01-IM6	0.173292	0.822697	0.00346336	0.354895	0.00054694	0	0
P-0004436-T01-IM5	0.399005	0.0837394	0.41508	0.354337	0.0900191	0	0.012157
P-0023765-T01-IM6	0.00602006	0.99398	1.79e-14	0.350419	4.08e-15	0	0
P-0032746-T01-IM6	0.526858	0.340199	0.0889444	0.349746	0.0407105	0	0.00328833
P-0007281-T01-IM5	0.485022	0.172636	0.180078	0.332267	0.14419	0.0161611	0.0180736
P-0008370-T01-IM5	0.496542	0.21407	0.194403	0.348312	0.0949847	0	0
P-0005634-T01-IM5	0.321919	0.295193	0.345476	0.347802	0.0374134	0	0
P-0008490-T01-IM5	0.294714	0.437556	0.180928	0.346464	0.0583962	0	0.0284059
P-0022886-T01-IM6	0.900124	0.0227233	0.0362836	0.344156	0.0407535	0	0.000115225
P-0006970-T01-IM5	0.454719	0.0661105	0.30353	0.340299	0.146114	0	0.0295266
P-0016027-T01-IM6	0.3558	0.638103	0.00280119	0.339172	0.00329565	0	0
P-0029475-T01-IM6	0.190842	0.46436	0.319479	0.336278	0.0161937	0	0.00912593
P-0015593-T01-IM6	0.524124	0.133887	0.230343	0.335821	0.111647	0	0
P-0014736-T01-IM6	0.379223	0.0131713	0.420107	0.333785	0.164782	0	0.0227158
P-0007757-T02-IM5	0.231285	0.00184684	0.606842	0.332837	0.157146	0	0.00288039
P-0015281-T01-IM6	0.459074	0.538415	0.000779846	0.331089	0.00172072	0	1.03e-05
P-0036159-T01-IM6	0.0904754	0.858489	0.0462294	0.3294	0.00247145	0	0.00233477
P-0007220-T01-IM5	0.840775	0.057944	0.0347768	0.31829	0.0665045	0.00600926	0
P-0001340-T01-IM3	0.527808	0.0108357	0.261189	0.322528	0.173103	0	0.027064
P-0021737-T01-IM6	0.174993	0.0334798	0.615698	0.320896	0.0615018	0	0.114327
P-0012361-T01-IM5	0.883167	0.116359	7.72e-05	0.317845	0.000397023	0	0
P-0022788-T01-IM6	0.297532	0.520126	0.155673	0.316289	0.0266689	0	0
P-0001365-T01-IM3	0.203965	0.0136031	0.57703	0.315237	0.133951	0	0.0714506
P-0007986-T01-IM5	0.639889	0.258474	0.0376284	0.311985	0.0496932	0	0.0143154
P-0013525-T01-IM5	0.271471	0.647598	0.0650757	0.309815	0.0158545	0	0
P-0004366-T01-IM5	0.369613	0.00953936	0.41193	0.309363	0.159315	0	0.049602
P-0015078-T01-IM6	0.183365	0.00153911	0.494526	0.308763	0.315125	0	0.00544468
P-0025733-T01-IM6	0.496187	0.44623	0.0335243	0.30871	0.0240595	0	0
P-0001251-T01-IM3	0.973373	0.0266196	1.09e-07	0.30783	6.96e-06	0	0
P-0017106-T01-IM6	0.118629	0.0532114	0.457603	0.300187	0.0830294	0.00680211	0.287527
P-0024771-T01-IM6	0.440265	0.153548	0.316795	0.304671	0.0722972	0	0.0170948
P-0004214-T01-IM5	0.0805988	0.918476	0.000868307	0.300808	5.66e-05	0	3.78e-07
P-0018366-T01-IM6	0.0382975	0.00120034	0.829074	0.300183	0.124293	0	0.00713459
P-0029950-T01-IM6	0.71206	0.107757	0.13717	0.297954	0.0386637	0	0.00434948
P-0013029-T01-IM5	0.153233	0.844415	0.00181831	0.296514	0.000527641	0	5.95e-06
P-0032398-T01-IM6	0.625036	0.359863	0.0119275	0.296108	0.0031247	0	4.92e-05
P-0004140-T01-IM5	0.496412	0.00883428	0.302708	0.296039	0.188543	0	0.00350335
P-0004253-T01-IM5	0.214398	0.711981	0.0542315	0.293192	0.0132072	0.00228073	0.00618281
P-0037873-T01-IM6	0.223383	0.775242	0.00072751	0.295178	0.000642719	2.04e-07	5.46e-06
P-0032780-T01-IM6	0.294785	0.388741	0.214211	0.28278	0.0754019	0.00918908	0.026861
P-0034697-T01-IM6	0.799679	0.107929	0.02081	0.291616	0.0702168	0	0.00136597
P-0017943-T01-IM6	0.577777	0.291306	0.07085	0.288336	0.050177	0	0.00989055
P-0005650-T01-IM5	0.580649	0.107304	0.177223	0.258159	0.0900115	0.0282261	0.0448126
P-0006973-T01-IM5	0.209466	0.633141	0.13365	0.28584	0.0171748	0	0.00656935
P-0028477-T01-IM6	0.120286	0.879711	6.12e-07	0.285336	1.5e-06	0	5.61e-10
P-0002965-T01-IM3	0.176254	0.293527	0.391601	0.282132	0.0385318	0	0.100086
P-0015530-T01-IM6	0.144908	0.201189	0.364818	0.280575	0.0565863	0	0.232499
P-0007517-T01-IM5	0.100496	0.540055	0.320893	0.279988	0.0143746	0	0.0241812
P-0003432-T01-IM5	0.823057	0.0178104	0.0517828	0.279189	0.101464	0	0.00588568
P-0014764-T01-IM6	0.0740701	0.464786	0.426002	0.276971	0.0351422	0	0
P-0005733-T01-IM5	0.047837	0.94984	0.00210888	0.275633	0.000214453	1.4e-06	0
P-0008912-T01-IM5	0.286575	0.656409	0.0381717	0.274023	0.0168873	0	0.00195708
P-0013481-T01-IM5	0.333408	0.494641	0.125627	0.273662	0.0389741	0	0.00734974
P-0015529-T01-IM6	0.328346	0.00939252	0.427428	0.273282	0.208839	0	0.0259947
P-0008942-T01-IM5	0.91244	0.085514	0.000645744	0.268014	0.0014	0	0
P-0030248-T01-IM6	0.671177	0.0382842	0.156776	0.267647	0.123997	0	0.0097657
P-0019267-T01-IM6	0.645288	0.0573015	0.116449	0.232874	0.163515	0.0343892	0.017447
P-0008445-T01-IM5	0.449829	0.130323	0.317059	0.265883	0.0875214	0.0012391	0.0152669
P-0025827-T01-IM6	0.12464	0.66163	0.199183	0.266476	0.0145467	0	0
P-0002018-T01-IM3	0.542018	0.0895678	0.260879	0.265457	0.0936924	0	0.0138432
P-0009363-T01-IM5	0.70416	0.0226134	0.0994391	0.26497	0.16451	0	0.00927765
P-0009148-T01-IM5	0.82295	0.0652358	0.0631678	0.262733	0.0475667	0.000674003	0.00107984
P-0002353-T01-IM3	0.116828	0.875013	0.00675308	0.262727	0.00117575	0	0.000230141
P-0004236-T01-IM5	0.612273	0.212914	0.0328246	0.131485	0.1301	0.130498	0.0118885
P-0020641-T01-IM6	0.398758	0.567488	0.0189752	0.260087	0.0147789	6.7e-06	0
P-0004376-T01-IM5	0.116053	0.00389237	0.357559	0.259067	0.0879673	0	0.434528
P-0024576-T01-IM6	0.0734763	0.817839	0.104923	0.258708	0.00376217	0	0
P-0024995-T01-IM6	0.279327	0.70991	0.00705207	0.256107	0.00356025	0.000964759	0.000149991
P-0024628-T01-IM6	0.637684	0.294698	0.0565001	0.25581	0.0109129	0	0.000205154
P-0035511-T01-IM6	0.927167	0.0136556	0.0239699	0.255208	0.0351383	0	6.9e-05
P-0027076-T01-IM6	0.380773	0.0993547	0.413111	0.25446	0.0897306	0	0.0170315
P-0019351-T01-IM6	0.189658	0.270233	0.172842	0.249914	0.0699715	0.00429773	0.297296
P-0020903-T01-IM6	0.62282	0.0271107	0.208599	0.253984	0.124885	0	0.0165856
P-0022986-T01-IM6	0.284584	0.421637	0.27124	0.253075	0.0225385	0	0
P-0008382-T01-IM5	0.399313	0.166503	0.302035	0.252706	0.11749	0	0.0146595
P-0022146-T01-IM6	0.327656	0.484499	0.138925	0.251625	0.0207674	0	0.0281536
P-0007970-T01-IM5	0.0297877	0.70215	0.237264	0.250494	0.00163734	0	0.029161
P-0001560-T01-IM3	0.48216	0.462142	0.0400516	0.25047	0.0123294	0	0.00331645
P-0020594-T01-IM6	0.234001	0.404754	0.31146	0.24998	0.0497845	0	0
P-0000978-T02-IM5	0.258062	0.424977	0.242347	0.249106	0.0357053	0	0.0389094
P-0037606-T02-IM6	0.0111477	0.988849	3.25e-06	0.246856	2.39e-07	0	2.04e-09
P-0018854-T01-IM6	0.639315	0.297227	0.0319492	0.246512	0.0315091	0	0
P-0022885-T01-IM6	0.826885	0.12585	0.0141221	0.246037	0.0331431	0	0
P-0028988-T01-IM6	0.106623	0.868886	0.0226041	0.244451	0.00188617	0	0
P-0009068-T01-IM5	0.0206743	1.06e-05	0.610555	0.243729	0.203147	0	0.165613
P-0009476-T01-IM5	0.475411	0.0451697	0.320165	0.243648	0.141334	0	0.0179207
P-0018132-T01-IM6	0.564995	0.348292	0.0475597	0.242778	0.0391537	0	0
P-0027875-T01-IM6	0.21326	0.0496957	0.342903	0.24061	0.104085	0	0.290057
P-0021934-T01-IM6	0.0932077	0.660287	0.207107	0.235712	0.020725	0.00418684	0.0186736
P-0016308-T01-IM6	0.816432	0.00351979	0.099398	0.239318	0.0802747	0	0.000375238
P-0028320-T01-IM6	0.251915	0.0126536	0.460039	0.238614	0.272529	0	0.00286382
P-0003865-T01-IM5	0.188919	0.012474	0.666957	0.23825	0.0838344	0	0.0478161
P-0012080-T01-IM5	0.691857	0.294285	0.00317291	0.237427	0.0104949	1e-06	0.000190558
P-0003255-T01-IM5	0.522881	0.345494	0.0851472	0.225286	0.0464775	0.00947936	0
P-0009586-T01-IM5	0.342542	0.00370608	0.300822	0.219144	0.346534	0.0150093	0.00639555
P-0002185-T01-IM3	0.300289	0.0112468	0.488224	0.23247	0.113948	0	0.0862928
P-0033470-T01-IM6	0.869805	0.114074	0.00203061	0.232129	0.0139885	0	0.000101799
P-0024769-T01-IM6	0.617402	0.0135596	0.226827	0.231674	0.13269	0	0.00952116
P-0027855-T01-IM6	0.286264	0.00972573	0.525017	0.229989	0.153026	0	0.0259681
P-0019949-T01-IM6	0.99585	5.62e-06	9.75e-06	0.228976	0.00413414	0	9.13e-07
P-0016191-T01-IM6	0.0973426	0.803973	0.0923572	0.227353	0.00632755	0	0
P-0020388-T01-IM6	0.151418	0.837321	0.00940016	0.22636	0.00168463	0	0.00017563
P-0015498-T01-IM6	0.375169	0.601845	0.00898546	0.225371	0.0140011	0.000119138	0
P-0003914-T01-IM3	0.479569	0.0275746	0.221873	0.223645	0.205208	0	0.0657755
P-0037913-T01-IM6	0.00144517	0.998541	1.38e-05	0.223459	6.72e-08	0	9.88e-09
P-0004437-T01-IM5	0.144103	0.612385	0.0115521	0.221877	0.0193074	0	0.212652
P-0034178-T01-IM6	0.563144	0.301907	0.0729385	0.218427	0.0620108	0.00215583	0
P-0003742-T01-IM5	0.449699	0.0513642	0.347547	0.220222	0.100129	0	0.0512612
P-0014966-T01-IM6	0.756605	0.117611	0.0485198	0.220143	0.0772643	0	0
P-0016533-T01-IM6	0.406177	0.0457022	0.400886	0.218343	0.0823453	0	0.0648892
P-0027739-T01-IM6	0.485351	0.418269	0.0631746	0.216272	0.0332053	0.00111309	0
P-0013544-T02-IM6	0.286402	0.0866399	0.484901	0.216366	0.0851795	0	0.0568775
P-0020885-T01-IM6	0.640034	0.131911	0.147971	0.215178	0.0800848	0	0
P-0003955-T01-IM3	0.282737	0.116995	0.536362	0.215106	0.0639061	0	0
P-0005271-T01-IM5	0.0351537	0.00552836	0.703818	0.21479	0.0291596	0	0.22634
P-0010613-T01-IM5	0.351046	0.0058209	0.268302	0.21446	0.311028	0	0.0638035
P-0023139-T01-IM6	0.0545717	0.84323	0.0955256	0.211857	0.00412684	0	0.00254604
P-0009762-T01-IM5	0.445164	0.100108	0.239874	0.21113	0.142843	0	0.0720116
P-0015882-T01-IM6	0.180975	0.817307	0.00113559	0.208302	0.000582061	0	0
P-0003009-T01-IM3	0.193646	0.00372222	0.590507	0.208165	0.191398	0	0.0207273
P-0012529-T01-IM5	0.645067	0.135018	0.10647	0.207953	0.107577	0	0.00586774
P-0006993-T01-IM5	0.181552	0.00674864	0.622749	0.207252	0.17497	0	0.0139803
P-0039052-T01-IM6	0.0753705	0.920806	0.00349124	0.207072	0.000331978	0	0
P-0013910-T01-IM5	0.770239	0.131037	0.0339011	0.20537	0.0626612	0	0.00216215
P-0013341-T01-IM5	0.770792	0.166701	0.0418413	0.205042	0.0206657	0	0
P-0029804-T01-IM6	0.628962	0.189257	0.0989865	0.204716	0.0827943	0	0
P-0010104-T01-IM5	0.67064	0.175728	0.0453673	0.196908	0.0908914	0.00741523	0.0173724
P-0001756-T01-IM3	0.330669	0.667048	0.0004985	0.204314	0.00176782	0	1.71e-05
P-0009538-T01-IM5	0.781904	0.0636059	0.0674688	0.203975	0.0845802	0	0.00244125
P-0033151-T01-IM6	0.826809	0.0387	0.0382395	0.203069	0.0910239	0	0.0052277
P-0030475-T01-IM6	0.0199132	0.972572	0.00719671	0.202786	0.000170438	6.51e-12	0.000147169
P-0036240-T01-IM6	0.625585	0.304339	0.0460334	0.202534	0.0217257	0	0.00231754
P-0009431-T01-IM5	0.725282	0.130605	0.0611756	0.201587	0.0829376	0	0
P-0010670-T01-IM5	0.850332	0.0780543	0.0133291	0.199923	0.0573254	0	0.000959403
P-0001081-T01-IM3	0.0653913	0.93448	0.000114586	0.198731	1.41e-05	0	0
P-0001135-T02-IM3	0.270399	0.0107697	0.621524	0.197274	0.0794669	0	0.0178405
P-0018665-T01-IM6	0.59998	0.0482266	0.253887	0.182266	0.0864192	0.0140958	0.0114873
P-0008651-T01-IM5	0.543736	0.0207039	0.308544	0.195795	0.114168	0	0.012848
P-0012279-T01-IM5	0.323695	0.0440741	0.481847	0.195222	0.135261	0	0.0151223
P-0024467-T01-IM6	0.236629	0.0438333	0.414219	0.193487	0.190812	0	0.114507
P-0039170-T01-IM6	0.124331	0.860972	0.0119661	0.192606	0.00249338	0	0.0002376
P-0003225-T01-IM5	0.0661387	0.76098	0.138941	0.192348	0.00873902	0.000117195	0.0252007
P-0010199-T01-IM5	0.752749	0.0160143	0.0383646	0.192081	0.18146	0	0.0114125
P-0005981-T01-IM5	0.309648	0.00516603	0.504988	0.189704	0.168064	0	0.0121336
P-0015373-T01-IM6	0.0155691	0.983218	0.00117608	0.186616	3.07e-05	0	6.17e-06
P-0007567-T01-IM5	0.733993	0.108286	0.0454757	0.186492	0.10727	0	0.00497507
P-0032404-T01-IM6	0.00216279	0.99783	6.78e-06	0.18626	3.73e-08	5.18e-12	0
P-0008169-T01-IM5	0.410641	0.0876052	0.387566	0.185938	0.0986292	0	0.0155579
P-0018683-T01-IM6	0.367096	0.0332437	0.41752	0.185426	0.133304	0	0.0488365
P-0029614-T01-IM6	0.437046	0.44083	0.0778178	0.185189	0.0362394	0	0.00806585
P-0003841-T01-IM5	0.913009	0.0108238	0.0210108	0.184993	0.0548858	0	0.000271097
P-0022807-T04-IM6	0.130799	0.848316	0.0189757	0.184524	0.00150254	0	0.000407231
P-0016177-T01-IM6	0.450593	0.0404665	0.328638	0.18204	0.151842	0	0.0284597
P-0003062-T01-IM5	0.86731	0.0945131	0.00267655	0.180023	0.0338378	0.00195379	0.00166264
P-0040076-T01-IM6	0.400272	0.513112	0.0543983	0.181652	0.0290082	0	0.00320922
P-0036241-T01-IM6	0.372745	0.572906	0.027836	0.179883	0.0197644	0	0.00674826
P-0006845-T01-IM5	0.45055	0.321243	0.13031	0.178984	0.0744596	0	0.0234375
P-0009846-T01-IM5	0.0538307	0.661658	0.201328	0.178026	0.00839172	4.13e-05	0.0747919
P-0018043-T01-IM6	0.407658	0.00936558	0.37663	0.177781	0.196261	0	0.0100854
P-0016855-T01-IM6	0.239148	0.640171	0.0798045	0.17079	0.0267737	0.00673398	0.0141027
P-0004661-T01-IM5	0.371644	0.202525	0.334131	0.177516	0.0729286	0	0.0187704
P-0016835-T01-IM6	0.165468	0.430524	0.374007	0.176705	0.0300008	0	0
P-0008228-T01-IM5	0.00926198	0.990701	3.63e-05	0.176433	3.22e-07	0	0
P-0006008-T01-IM5	0.789749	0.0199066	0.0687555	0.174643	0.116244	0	0.00534395
P-0006719-T01-IM5	0.944778	0.0466457	0.00204472	0.174411	0.00653079	0	1.28e-06
P-0024827-T01-IM6	0.224979	0.536392	0.174631	0.17259	0.0462961	0.00144436	0.0177023
P-0007099-T01-IM5	0.141444	0.00716461	0.705089	0.173985	0.138902	0	0.00740027
P-0009451-T01-IM5	0.495952	0.201026	0.174836	0.149103	0.105732	0.0240804	0.0224541
P-0010495-T01-IM5	0.595629	0.024672	0.231147	0.173132	0.137731	0	0.0108205
P-0017508-T01-IM6	0.392324	0.0251464	0.389159	0.172872	0.153423	0	0.0399472
P-0025164-T01-IM6	0.0116372	0.988343	1.91e-05	0.171309	4.78e-07	5.98e-14	0
P-0016210-T01-IM6	0.756614	0.0333165	0.0698791	0.170139	0.133186	0	0.00700361
P-0008999-T01-IM5	0.510608	0.255763	0.0655008	0.156974	0.121222	0.0130519	0.0469068
P-0009365-T01-IM5	0.236814	0.040861	0.609023	0.168862	0.0840332	0	0.029269
P-0021458-T01-IM6	0.0278116	0.957109	0.0148812	0.168537	0.000198367	1.38e-08	0
P-0009473-T01-IM5	0.264211	0.376657	0.240344	0.165861	0.0540115	0.00266058	0.0647767
P-0012119-T01-IM5	0.0173208	0.977855	0.00449959	0.167334	0.000191237	2.16e-05	0.000133775
P-0010986-T01-IM5	0.50929	0.00555133	0.275989	0.166846	0.193407	0	0.0157616
P-0034282-T01-IM6	0.32819	0.66835	0.00173638	0.16616	0.00170951	4.09e-09	1.42e-05
P-0021769-T01-IM6	0.0431466	0.956846	6.32e-06	0.165785	7.69e-07	2.89e-22	2.51e-10
P-0010215-T01-IM5	0.0720593	0	0.501602	0.165249	0.124924	0	0.301415
P-0037955-T01-IM6	0.253847	0.683285	0.0521383	0.160904	0.0107301	0	0
P-0000553-T01-IM3	0.820073	0.0272362	0.0452231	0.159696	0.103717	0	0.00375007
P-0020986-T01-IM6	0.191687	0.00050954	0.543598	0.158804	0.251864	0	0.0123417
P-0022510-T01-IM6	0.465468	0.199699	0.224501	0.15866	0.0990477	0	0.0112855
P-0006227-T01-IM5	0.260733	0.239123	0.403953	0.157888	0.0719375	0	0.0242529
P-0021470-T01-IM6	0.0634604	0.00802271	0.868699	0.154361	0.0582684	0	0.00154946
P-0012446-T01-IM5	0.847489	0.143858	0.00131048	0.15339	0.00723737	3.62e-06	0.000105036
P-0010847-T01-IM5	0.481342	0.498386	0.00548103	0.153253	0.0145542	0	0.000236585
P-0007977-T01-IM5	0.240863	0.209397	0.409932	0.152885	0.0599365	0	0.0798708
P-0032984-T01-IM6	0.921755	0.0381577	0.013887	0.152779	0.0259928	0	0.000207812
P-0016530-T01-IM6	0.112103	0.668705	0.168511	0.152446	0.0128027	0	0.0378778
P-0010380-T01-IM5	0.497414	0.0265784	0.267048	0.152188	0.199706	0	0.0092538
P-0006842-T01-IM5	0.0705536	0.0916386	0.736406	0.151354	0.0355259	0	0.0658757
P-0003051-T01-IM5	0.632042	0.0998582	0.187028	0.151049	0.0677166	0	0.0133545
P-0011476-T01-IM5	0.450769	0.283737	0.187424	0.150965	0.0601477	0	0.0179221
P-0029808-T01-IM6	0.190546	0.720191	0.0700407	0.149963	0.0129326	0.000443097	0.00628898
P-0005488-T01-IM5	0.698082	0.0186619	0.0352785	0.149652	0.231189	0	0.0167884
P-0014047-T03-IM6	0.711524	0.209065	0.0600881	0.148985	0.0184599	0	0.000862874
P-0018800-T01-IM6	0.371985	0.111989	0.450978	0.148981	0.0582442	0	0.00680386
P-0008106-T03-IM6	0.444512	0.18242	0.239772	0.130541	0.0820445	0.0175838	0.0512513
P-0007575-T01-IM5	0.0478202	0.711495	0.228219	0.148106	0	0	0.0124658
P-0029764-T01-IM6	0.0188894	0.980802	0.00030158	0.147099	6.22e-06	0	6.56e-07
P-0000818-T01-IM3	0.527337	0.0380211	0.243506	0.146262	0.174253	0	0.0168834
P-0020957-T01-IM6	0.980507	0.0191823	1.08e-05	0.14616	0.000300065	0	0
P-0000867-T01-IM3	0.572472	0.105122	0.148465	0.144957	0.141193	0	0.0327479
P-0004232-T01-IM5	0.428536	0.0132726	0.307063	0.143404	0.191584	0	0.0595443
P-0011081-T01-IM5	0.386683	0.231191	0.238625	0.143155	0.0952385	0	0.0482621
P-0010855-T01-IM5	0.438975	0.0151731	0.379305	0.14314	0.121458	0	0.045089
P-0032126-T01-IM6	0.231781	0.0154892	0.534912	0.142991	0.193299	0	0.0245187
P-0032570-T01-IM6	0.000150322	0.999847	2.59e-06	0.142946	3.42e-10	0	0
P-0013598-T01-IM5	0.574155	0.358739	0.0502227	0.140866	0.0168841	0	0
P-0013765-T01-IM5	0.762535	0.0905069	0.0742247	0.140614	0.0727335	0	0
P-0013854-T01-IM5	0.254484	0.0604827	0.585336	0.140275	0.0771498	0	0.0225479
P-0007310-T01-IM5	0.433241	0.0075329	0.317227	0.140185	0.233367	0	0.00863253
P-0028316-T01-IM6	0.55703	0.134687	0.175752	0.139349	0.111884	0	0.0206458
P-0005583-T01-IM5	0.222309	0.533873	0.175999	0.133599	0.0429479	0.00480736	0.0248701
P-0017272-T01-IM6	0.150808	0.662698	0.152412	0.138234	0.0216359	0	0.0124463
P-0014229-T01-IM6	0.0129069	0.98705	4.1e-05	0.137607	1.59e-06	0	1.45e-07
P-0027603-T01-IM6	0.123694	0.873439	0.00192241	0.137504	0.000933844	3.75e-10	1.03e-05
P-0021526-T01-IM6	0.492118	0.488721	0.00930843	0.137416	0.0094307	1.52e-09	0.000421324
P-0026488-T02-IM6	0.00605895	0.98958	0.00431155	0.136378	2.13e-05	5.73e-08	2.81e-05
P-0014206-T01-IM6	0.723256	0.265714	0.00312424	0.136335	0.00790564	0	0
P-0038817-T01-IM6	0.536577	0.291134	0.0926325	0.136096	0.0796559	0	0
P-0005039-T01-IM5	0.0587516	0.938782	0.00235223	0.135655	0.00011378	9.66e-11	0
P-0006213-T01-IM5	0.803557	0.0128206	0.0498304	0.135405	0.130376	0	0.0034167
P-0005721-T01-IM5	0.377574	0.0607262	0.35512	0.135238	0.18806	0	0.0185199
P-0018031-T01-IM6	0.601822	0.261294	0.0701714	0.134465	0.0549237	0	0.011788
P-0005146-T01-IM5	0.0755218	0.00492593	0.511124	0.133953	0.0640858	0	0.344343
P-0021848-T01-IM6	0.106057	0.0840546	0.367545	0.125517	0.096069	0.00776556	0.346274
P-0032739-T01-IM6	0.530538	0.0754767	0.283537	0.133074	0.0917304	0	0.0187187
P-0017797-T01-IM6	0.0198017	0.980116	8.04e-05	0.132795	2e-06	1.77e-16	0
P-0022232-T01-IM6	0.159415	0.594519	0.179972	0.132769	0.0281254	4.8e-06	0.0379679
P-0008360-T01-IM5	0.201626	0.241735	0.43348	0.13251	0.087722	0	0.0354373
P-0007980-T01-IM5	0.060336	0.840573	0.0938281	0.132113	0.00229802	0	0.00296516
P-0021331-T01-IM6	0.525584	0.36792	0.0466429	0.132104	0.0295646	0	0.030289
P-0005510-T01-IM5	0.109358	0	0.683626	0.130088	0.0945342	0.0018037	0.112482
P-0027270-T01-IM6	0.902406	0.0394705	0.0394331	0.131857	0.0183318	0	0.000359099
P-0003698-T02-IM5	0.0942406	0.162124	0.694442	0.130094	0.0384806	0	0.0107122
P-0013274-T01-IM5	0.137832	0.566786	0.223855	0.128993	0.0249158	0.000817784	0.0466116
P-0024270-T01-IM6	0.108254	0.502693	0.351435	0.12873	0.0376177	0	0
P-0000682-T01-IM3	0.165177	0.0170932	0.123516	0.128427	0.3906	0	0.303613
P-0031177-T01-IM6	0.591759	0.170393	0.0141564	0.128321	0.175323	0	0.0483679
P-0015832-T01-IM6	0.765845	0.233369	0.00012367	0.128113	0.000657259	0	5.3e-06
P-0028920-T01-IM6	0.399005	0.597817	0.00112497	0.128018	0.00205321	0	0
P-0030816-T01-IM6	0.61867	0.252924	0.0474322	0.127759	0.0734976	0	0.00747563
P-0009736-T01-IM5	0.443784	0.462793	0.0504028	0.127316	0.0392872	0	0.0037325
P-0018216-T01-IM6	0.0354602	0.936141	0.0266436	0.127088	0.00175486	0	0
P-0016646-T01-IM6	0.00112349	0.132036	0.86392	0.126543	0.00028686	0	0.00263328
P-0007291-T01-IM5	0.640543	0.051768	0.0862223	0.122745	0.190727	0.00378024	0.0307395
P-0012856-T01-IM5	0.207746	0.78874	0.0014027	0.12588	0.00204369	2.09e-10	6.75e-05
P-0004871-T01-IM5	0.0413334	0.926745	0.0271558	0.125832	0.00119147	0	0.00357438
P-0040246-T01-IM6	0.00130199	0.998676	2.2e-05	0.125686	1.95e-08	0	2.02e-08
P-0014969-T01-IM6	0.394341	0.039853	0.40284	0.124697	0.154066	0	0.00890042
P-0036712-T01-IM6	0.22426	0.748213	0.0225636	0.124563	0.0049639	0	0
P-0015531-T01-IM6	0.234425	0.0076541	0.581355	0.124374	0.146152	0	0.0304135
P-0002437-T01-IM3	0.117399	0.131009	0.652429	0.123828	0.0282628	0	0.0709005
P-0016931-T01-IM6	0.487678	0.0411778	0.324922	0.12295	0.131029	0	0.0151935
P-0015106-T01-IM6	0.861111	0.103771	0.00198081	0.122489	0.0328246	0	0.000312255
P-0017461-T01-IM6	0.356393	0.00357346	0.260717	0.121236	0.315209	0	0.0641078
P-0013283-T01-IM5	0.267324	0.456569	0.244687	0.120423	0.0314197	0	0
P-0022123-T01-IM6	0.213788	0.714033	0.0525532	0.120255	0.0155336	5.38e-05	0.00409227
P-0025224-T01-IM6	0.291701	0.000934225	0.256558	0.117584	0.322437	0.00259795	0.12837
P-0027707-T01-IM6	0.283096	0.610532	0.0742623	0.119053	0.0264537	0	0.0056561
P-0010848-T01-IM5	0.102553	0.663494	0.211573	0.119	0.010129	0	0.0122516
P-0025174-T01-IM6	0.114659	0.710403	0.1593	0.117958	0.0156374	0	0
P-0030654-T01-IM6	0.00191538	0.847144	0.150486	0.117951	0	0	0.000455257
P-0015511-T01-IM6	0.540891	0.426959	0.0146767	0.117028	0.0174733	0	0
P-0022068-T01-IM6	0.546573	0.0464611	0.30326	0.116122	0.091179	0	0.0125272
P-0026326-T01-IM6	0.656185	0.296816	0.0156632	0.115674	0.026217	0	0.00511905
P-0018568-T01-IM6	0.0305065	0.494826	0.245566	0.115481	0.0199407	0	0.209161
P-0006407-T01-IM5	0.936671	0.0612922	0.000182126	0.114613	0.00185272	0	1.73e-06
P-0023749-T01-IM6	0.449504	0.062848	0.281579	0.114418	0.147115	0	0.0589543
P-0011522-T01-IM5	0.648394	0.017742	0.17522	0.114183	0.147628	0	0.0110155
P-0029242-T01-IM6	0.0624079	0.0272605	0.185883	0.0984857	0.227136	0.0151293	0.497313
P-0003738-T02-IM5	0.0139422	0.878797	0.0945668	0.113036	0.00177948	0.000131099	0.0109141
P-0009744-T01-IM5	0.50032	0.360071	0.0794518	0.112935	0.0490973	0	0.0110597
P-0004463-T01-IM5	0.0420562	0.711715	0.238381	0.112697	0.00417856	0	0.00366948
P-0008718-T01-IM5	0.0687709	0.789194	0.125208	0.109168	0.00656529	0.0027144	0.0102622
P-0012427-T01-IM5	0.626234	0.0769558	0.123935	0.111764	0.155561	0	0.0173139
P-0013025-T01-IM5	0.529831	0.397481	0.0422086	0.111498	0.0304795	0	0
P-0016018-T01-IM6	0.594934	0.275477	0.0620895	0.111151	0.0622803	6.67e-05	0.00521919
P-0016276-T01-IM6	0.0309757	0.00157217	0.166285	0.0527828	0.0268733	0.0582094	0.774294
P-0027768-T01-IM6	0.90651	0.084308	0.000832979	0.11075	0.0083488	6.59e-06	0
P-0005144-T01-IM5	0.19656	0.0259737	0.429971	0.110702	0.147078	0	0.200417
P-0008257-T01-IM5	0.765566	0.0114952	0.114332	0.11036	0.105991	0	0.00261703
P-0032937-T01-IM6	0.419675	0.396145	0.10091	0.107715	0.0547816	0.00232746	0.0284879
P-0012420-T01-IM5	0.654327	0.011733	0.184965	0.10814	0.127618	0	0.0213576
P-0006826-T01-IM5	0.0312157	0.789635	0.174299	0.108134	0	0	0.00485071
P-0017276-T01-IM6	0.222686	0.17199	0.550984	0.108026	0.05434	0	0
P-0001530-T01-IM3	0.468044	0.0271006	0.35389	0.107902	0.137066	0	0.0138996
P-0021584-T01-IM6	0.713257	0.232996	0.017554	0.107576	0.0350522	0	0.0011413
P-0019540-T01-IM6	0.103231	0.187321	0.514576	0.106627	0.0474	0	0.147471
P-0015075-T01-IM6	0.208037	0.0257841	0.550386	0.106506	0.137	0	0.0787929
P-0024536-T01-IM6	0.365018	0.576513	0.0335016	0.106373	0.0203295	9.66e-08	0.00463794
P-0029387-T01-IM6	0.738895	0.257299	0.000939576	0.10588	0.00286656	0	0
P-0008290-T01-IM5	0.251608	0.0123897	0.509881	0.10486	0.140286	0	0.0858348
P-0016327-T01-IM6	0.0636329	0.935783	0.000403979	0.100866	0.000179699	0.0036749	0
P-0033199-T01-IM6	0.177018	0.65536	0.153408	0.104406	0.00895182	0	0.00526246
P-0017176-T01-IM6	0.615244	0.34076	0.0178315	0.103282	0.0261645	6.87e-06	0
P-0017003-T01-IM6	0.556779	0.246671	0.140558	0.10317	0.0526449	0	0.0033467
P-0008963-T01-IM5	0.674641	0.0794273	0.134278	0.103074	0.104216	0	0.00743824
P-0020146-T01-IM6	0.0817328	0.798675	0.109676	0.101431	0.00518496	1.16e-05	0.00473154
P-0021948-T01-IM6	0.0326867	0.966724	0.000563378	0.101101	2.61e-05	2.84e-12	0
P-0007088-T02-IM5	0.46584	0.0137312	0.33689	0.100781	0.162052	0	0.0214871
P-0003034-T01-IM5	0.120909	0.004396	0.742157	0.0992666	0.117845	0	0.0146931
P-0015386-T01-IM6	0.00262408	0.997375	6.45e-07	0.0990294	1.82e-08	2.37e-13	1.46e-11
P-0035523-T01-IM6	0.459548	0.159991	0.198162	0.0989731	0.120297	0	0.062002
P-0022308-T01-IM6	0.173974	0.740051	0.0736284	0.0985472	0.0123468	0	0
P-0004693-T01-IM5	0.707395	0.00472711	0.17396	0.0980717	0.103015	0	0.0109026
P-0015462-T01-IM6	0.139713	0.0462938	0.695537	0.097858	0.0874437	0	0.0310124
P-0018042-T01-IM6	0.704972	0.292268	0.000446939	0.0976088	0.00231328	0	0
P-0008792-T01-IM5	0.00617882	0.4011	0.584904	0.0975518	0	0	0.00781771
P-0007278-T01-IM5	0.201275	0.00399893	0.559755	0.0967256	0.205964	0	0.0290078
P-0032455-T01-IM6	0.341111	0.00168446	0.458373	0.0964681	0.189171	0	0.00966023
P-0007619-T01-IM5	0.106413	0.0362403	0.69472	0.0956324	0.0867247	0	0.0759029
P-0010818-T01-IM5	0.822083	0.121863	0.0238657	0.0939789	0.0318357	0	0.000353101
P-0019417-T01-IM6	0.00245034	0.804704	0.162344	0.0939182	0.000247222	0	0.0302547
P-0006731-T01-IM5	0.0934323	0.890165	0.0146471	0.0915298	0.00141298	0	0.000342947
P-0020109-T01-IM6	0.482248	0.20428	0.204586	0.0904052	0.108886	0	0
P-0013719-T01-IM5	0.0498994	0.0502459	0.666829	0.0903852	0.0352643	0	0.197762
P-0021375-T01-IM6	0.00593541	0.471929	0.517029	0.0902735	0	0	0.00510636
P-0016915-T01-IM6	0.00846342	0.237632	0.734077	0.0895995	0	0	0.0198284
P-0010236-T01-IM5	0.393756	0.454561	0.113703	0.0894919	0.0379803	0	0
P-0014562-T01-IM6	0.115697	0.00304762	0.790379	0.0891499	0.0861488	0	0.00472692
P-0009563-T01-IM5	0.412187	0.130264	0.309156	0.0889414	0.132496	0	0.0158966
P-0002440-T01-IM3	0.91509	0.00933713	0.0181148	0.0882937	0.0565349	0	0.00092335
P-0002483-T01-IM3	0.178196	0.0224801	0.653296	0.0882003	0.0752395	0	0.0707879
P-0014507-T01-IM6	0.0722622	0.721657	0.188624	0.0878967	0.0100903	0	0.00736585
P-0035134-T01-IM6	0.0483921	0.928231	0.0224311	0.0878575	0.000587051	0	0.000358852
P-0021743-T01-IM6	0.966612	4.59e-05	0.0285555	0.0867935	0.00478367	0	3.06e-06
P-0036862-T01-IM6	0.294205	0.0472048	0.510778	0.0866117	0.12378	0	0.0240323
P-0008375-T01-IM5	0.245107	0.205897	0.490443	0.0856703	0.0390908	0	0.0194622
P-0039447-T01-IM6	0.871338	0.0312448	0.03016	0.0855067	0.0669512	0	0.000306012
P-0021034-T01-IM6	0.286389	0.0145805	0.544172	0.0852103	0.113099	0	0.0417593
P-0006192-T01-IM5	0.110366	0.653543	0.207547	0.0850487	0.0114431	0	0.0171007
P-0001773-T01-IM3	0.518826	0.407683	0.0362419	0.0848798	0.0354236	0	0.00182568
P-0009379-T01-IM5	0.172868	0.00762007	0.376177	0.0829889	0.235717	0.00171235	0.207618
P-0007834-T01-IM5	0.199393	0.0306264	0.660566	0.084555	0.0853936	0	0.0240205
P-0000422-T01-IM3	0.526866	0.0106586	0.252578	0.0844367	0.194952	0	0.0149454
P-0019271-T01-IM6	0.232485	0.027275	0.460658	0.0842213	0.102631	0	0.176951
P-0024221-T01-IM6	0.105499	0.524197	0.245734	0.0840737	0.0240402	0	0.10053
P-0008425-T01-IM5	0.00402567	0.859697	0.135429	0.0839891	0	0	0.00084869
P-0014815-T01-IM6	0.124677	0.22614	0.583635	0.0834897	0.0443846	0	0.0211632
P-0028041-T01-IM6	0.148203	0.403508	0.367772	0.0833443	0.0330433	0	0.0474733
P-0007495-T01-IM5	0.45942	0.088202	0.242038	0.0827606	0.196015	0	0.0143254
P-0012999-T01-IM5	0.606325	0.364063	0.0127308	0.0825178	0.0165964	0	0.000284381
P-0004349-T01-IM5	0.33942	0.10436	0.382935	0.0822983	0.143463	0	0.029822
P-0037755-T01-IM6	0.520882	0.311654	0.10723	0.0822066	0.0553945	0	0.00483969
P-0013923-T01-IM5	0.616151	0.027193	0.171026	0.0821899	0.112725	0	0.0729054
P-0004933-T01-IM5	0.245088	0.0620102	0.250614	0.081953	0.201975	0	0.240313
P-0012341-T01-IM5	0.24722	0.0686694	0.521863	0.0816343	0.0890215	0	0.0732263
P-0033292-T01-IM6	0.219149	0.0677864	0.622898	0.0816035	0.0717516	0	0.0184156
P-0018304-T01-IM6	0.0346057	0.62118	0.312825	0.0807216	0.00551921	0	0.0258703
P-0020755-T01-IM6	0.135198	0.0521193	0.502697	0.0807143	0.0999117	0	0.210074
P-0009526-T01-IM5	0.7176	0.0546891	0.0513186	0.0804772	0.173075	0	0.00331787
P-0014159-T01-IM5	0.777245	0.0188618	0.0750796	0.0804126	0.127916	0	0.000897683
P-0028681-T01-IM6	0.739904	0.0378569	0.181884	0.0802598	0.0401792	0	0.00017489
P-0012315-T01-IM5	0.409888	0.124408	0.401281	0.0799102	0.0589948	0	0.00542815
P-0023041-T01-IM6	0.16917	0.830805	1.45e-05	0.0797447	1.1e-05	0	3.25e-09
P-0019889-T02-IM6	0.00156979	0.995659	0.00275135	0.079542	8e-06	3.84e-05	1.21e-05
P-0003743-T01-IM5	0.570051	0.311327	0.0717729	0.07869	0.0468489	0.000723762	0
P-0019490-T01-IM6	0.0762525	0.923676	2.09e-05	0.079038	5.09e-05	3.91e-07	9.85e-08
P-0024344-T01-IM6	0.896226	0.0559368	0.00461764	0.0790059	0.0432195	0	0
P-0019771-T01-IM6	0.120411	0.767578	0.0836678	0.0694238	0.0175413	0.00930074	0.0108025
P-0018679-T01-IM6	0.0345149	0.959784	0.00553559	0.0786598	0.000165825	8.85e-11	0
P-0020592-T01-IM6	0.0248656	0.465868	0.482216	0.078198	0	0	0.0270499
P-0026289-T01-IM6	0.279807	0.00067157	0.518098	0.0781136	0.198494	0	0.00292983
P-0020564-T02-IM6	0.0454966	0.952677	0.00176552	0.0780414	6.13e-05	0	0
P-0033610-T01-IM6	0.272851	0.197649	0.410948	0.0726706	0.0722901	0.0051405	0.0462608
P-0021995-T01-IM6	0.13397	0.86457	0.00100054	0.0777875	0.000415909	0	4.35e-05
P-0006539-T01-IM5	0.0768568	0.00370882	0.200742	0.0756648	0.211742	0	0.50695
P-0033779-T01-IM6	0.402496	0.046922	0.422156	0.0755755	0.106462	0	0.0219632
P-0005493-T01-IM5	0.34602	0.176517	0.337604	0.0548542	0.103884	0.0204926	0.035974
P-0003609-T01-IM5	0.246286	0.0411518	0.539107	0.0752653	0.130669	0	0.0427866
P-0009370-T01-IM5	0.24257	0.0415941	0.594721	0.0750301	0.113437	0	0.00767827
P-0016185-T01-IM6	0.205234	0.0660948	0.531306	0.0749466	0.14618	0	0.0511856
P-0019569-T01-IM6	0.349458	0.625186	0.0122034	0.0748053	0.0125549	3.37e-06	0.000597503
P-0019861-T01-IM6	0.229979	0.581745	0.144297	0.074309	0.0320819	0	0.0118967
P-0019443-T01-IM6	0.210567	0.689782	0.0856065	0.07414	0.014044	0	0
P-0013652-T01-IM5	0.207958	0.605692	0.155857	0.0736204	0.027947	0	0.00254541
P-0019027-T01-IM6	0.00746943	0.233458	0.748264	0.0734383	0.00459185	0	0.00621708
P-0016767-T01-IM6	0.844895	0.00190619	0.0175335	0.0731948	0.132762	0	0.0029027
P-0012925-T01-IM5	0.0848757	0.213975	0.644445	0.0729056	0.038436	0	0.0182678
P-0035564-T01-IM6	0.0953743	0.896048	0.00654795	0.0725526	0.00172369	3.8e-06	0.000305742
P-0010915-T01-IM5	0.0815401	0.901563	0.0140674	0.0699509	0.00247889	0.00259052	0.000351057
P-0002444-T01-IM3	0.278431	0.00223273	0.532519	0.0724551	0.179639	0	0.00717763
P-0027752-T01-IM6	0.566988	0.432964	2.38e-06	0.0723906	4.53e-05	2.06e-15	0
P-0006954-T01-IM5	0.340721	0.0156431	0.450384	0.0723677	0.144574	0	0.0486783
P-0034042-T01-IM6	0.0050258	0.993168	0.00180272	0.0718621	3.27e-06	0	1.78e-07
P-0006339-T01-IM5	0.05126	0.94874	6.44e-10	0.0711507	6.61e-09	1.32e-16	2.5e-14
P-0012993-T01-IM5	0.47195	0.312122	0.122394	0.069391	0.0670774	0.0016326	0.0264564
P-0016596-T01-IM6	0.0210206	0.00239236	0.0693999	0.0688762	0.00254535	0.00163327	0.904642
P-0024530-T01-IM6	0.446469	0.0600591	0.250707	0.0699078	0.218987	0	0.0237781
P-0024339-T01-IM6	0.00739988	0.992558	4.15e-05	0.0683233	9.13e-07	6.64e-10	2.02e-08
P-0015438-T01-IM6	0.0125458	0.987454	1.4e-09	0.068169	1.01e-09	1.46e-13	1.3e-13
P-0005522-T01-IM5	0.0961323	0.0684828	0.146844	0.0552987	0.147325	0.0127433	0.541216
P-0017484-T01-IM6	0.354462	0.00334637	0.232275	0.0678248	0.39299	0	0.0169266
P-0009245-T01-IM5	0.755128	0.206647	0.00626421	0.0675617	0.0316807	7.13e-06	0.000279749
P-0023731-T01-IM6	0.332222	0.0754674	0.295969	0.0556681	0.174892	0.011899	0.121449
P-0015407-T01-IM6	0.338651	0.645492	0.00820401	0.067393	0.00707841	0	0.000574699
P-0025888-T01-IM6	0.0204302	0.838474	0.141096	0.0672037	0	0	0
P-0023596-T01-IM6	0.0879986	0.0129536	0.436011	0.0660065	0.106356	0.00110619	0.356681
P-0015928-T01-IM6	0.0950507	0.0567529	0.776382	0.0667745	0.039025	0	0.0327892
P-0022759-T01-IM6	0.00197251	0.997548	0.000468214	0.0637095	4.54e-06	0.00290419	7.04e-06
P-0018466-T01-IM6	0.0796217	0.780923	0.118966	0.0663182	0.011938	9.26e-05	0.00855199
P-0013596-T01-IM5	0.758478	0.00957062	0.0962519	0.0655191	0.132868	0	0.00283112
P-0017539-T01-IM5	0.139152	0.356685	0.417414	0.0651657	0.0344616	0	0.0522863
P-0044186-T01-IM6	0.1351	0.0602059	0.641927	0.0649554	0.116042	0	0.0467247
P-0021075-T01-IM6	0.0734039	0.905309	0.00265303	0.0649267	0.00236236	5.5e-11	0.016272
P-0013063-T01-IM5	0.299713	0.00297786	0.527423	0.064853	0.147087	0	0.0227992
P-0003507-T01-IM5	0.149596	0.166828	0.600418	0.0648138	0.0582895	0	0.0248678
P-0037749-T01-IM6	0.67503	0.105134	0.11053	0.0644931	0.105611	0	0.00369519
P-0020638-T01-IM6	0.113102	0.886544	0.000241229	0.0644918	0.000107491	0	5.31e-06
P-0010514-T01-IM5	0.144024	0.0419835	0.61579	0.0643325	0.155813	0	0.042389
P-0011508-T01-IM5	0.339885	0.0713956	0.413257	0.0642992	0.137281	0	0.038181
P-0021169-T01-IM6	0.00875181	0.991202	4.45e-05	0.0642735	2.03e-06	1.12e-14	7.2e-08
P-0013653-T01-IM5	0.392598	0.00517319	0.315224	0.0638794	0.27816	0	0.00884437
P-0002748-T02-IM5	0.0340459	0.88758	0.0771599	0.0629465	0.0012138	0	0
P-0004890-T01-IM5	0.177985	0.00684353	0.703295	0.0628905	0.105779	0	0.00609791
P-0010385-T01-IM5	0.24661	0.0150588	0.539905	0.051847	0.172606	0.0108765	0.0258209
P-0022702-T01-IM6	0.325451	0.671191	0.000412658	0.062306	0.00290501	0.000319004	4.05e-05
P-0007142-T01-IM5	0.22396	0.0396348	0.624618	0.0624092	0.0760309	0	0.0357563
P-0022471-T01-IM6	0.255266	0.720019	0.0118903	0.0621734	0.00730455	0.000103105	0.00552044
P-0018187-T01-IM6	0.109364	0.877287	0.00999288	0.0608863	0.0028398	0.000561131	0.000515861
P-0022291-T02-IM6	0.18608	0.00996049	0.606128	0.0610336	0.184089	0	0.0137424
P-0011097-T01-IM5	0.15177	0.103334	0.469775	0.0601391	0.121971	0	0.153151
P-0002706-T01-IM3	0.239845	0.678066	0.0759542	0.0600752	0.00532373	0	0.000811098
P-0017353-T01-IM6	0.0941665	0.469284	0.389603	0.0599174	0.0210098	0	0.0259372
P-0039287-T01-IM6	0.89603	0.0337177	0.0219234	0.0599004	0.0481744	0	0.000154388
P-0026835-T01-IM6	0.00225015	0.997683	6.59e-05	0.059634	9.82e-07	6.76e-12	1.09e-07
P-0006476-T01-IM5	0.699882	0.190171	0.0475009	0.0594391	0.0606576	0	0.00178848
P-0026274-T02-IM6	0.840148	0.142465	0.00270326	0.0586769	0.0135873	0	0.00109728
P-0022441-T01-IM6	0.00919451	0.528901	0.459761	0.0575267	0.00125735	0	0.000887
P-0021847-T01-IM6	0.0018532	0.998129	1.79e-05	0.0574046	1.61e-07	0	4.39e-09
P-0023645-T01-IM6	0.26776	0.411988	0.272891	0.0569994	0.0394104	0	0.00795141
P-0028067-T01-IM6	0.0376672	0.900687	0.0578708	0.0559773	0.00377468	0.000630609	0
P-0021651-T01-IM6	0.0161778	0.915253	0.0669981	0.0563014	0.000367353	0	0.00120413
P-0023926-T01-IM6	0.169586	0.00463763	0.752184	0.0560639	0.0673913	0	0.00620125
P-0016282-T01-IM6	0.0580095	0.941675	0.000286727	0.0558741	2.88e-05	9.89e-11	0
P-0024166-T02-IM6	0.00968651	0.98642	0.00382488	0.0557439	5.53e-05	2.03e-07	1.32e-05
P-0007531-T01-IM5	0.129311	0.0237954	0.541613	0.05478	0.138154	0	0.167127
P-0010450-T01-IM5	0.0541209	0.0563617	0.452435	0.0539867	0.0693638	0	0.367719
P-0019720-T01-IM6	0.0334766	0.966281	0.0002283	0.0537382	1.29e-05	0	7.06e-07
P-0008878-T01-IM5	0.182269	0.028536	0.660189	0.0469669	0.0891431	0.00646726	0.039863
P-0019316-T01-IM6	0.441218	0.142027	0.261715	0.0533338	0.108337	0	0.0467028
P-0021004-T01-IM6	0.0194539	0.903374	0.0708693	0.0533169	0.00242537	0	0.00387792
P-0011499-T01-IM5	0.232289	0.0251017	0.567046	0.0530978	0.159039	0	0.0165234
P-0002028-T01-IM3	0.626767	0.0270257	0.21257	0.0527866	0.112698	0	0.0209396
P-0022827-T03-IM6	0.514538	0.485422	1.69e-06	0.052452	3.84e-05	1.42e-10	0
P-0019557-T01-IM6	0.185385	0.667974	0.0910775	0.0521805	0.0196774	0	0.0358861
P-0025973-T01-IM6	4.63e-09	1	3.99e-20	0.0519082	4.16e-27	0	3.18e-34
P-0039360-T01-IM6	0.759644	0.0903594	0.0886015	0.0510204	0.0581004	0	0.0032945
P-0027338-T01-IM6	0.211723	0.788235	1.78e-05	0.0507317	2.4e-05	0	1.11e-07
P-0000880-T01-IM3	0.0458761	0.911324	0.0378524	0.0432091	0.00284756	0.00730949	0.00210036
P-0030939-T01-IM6	0.729961	0.152601	0.0317721	0.0471662	0.0842658	0.00319313	0.00140005
P-0016634-T01-IM6	0.0592786	0.0440515	0.774603	0.0501704	0.0780487	0	0.0440185
P-0006541-T02-IM5	0.15363	0.833619	0.0101568	0.0499283	0.00254558	0	4.86e-05
P-0010311-T01-IM5	0.376137	0.0533879	0.21668	0.0465803	0.24208	0.00302873	0.111715
P-0014648-T01-IM6	0.253891	0.243007	0.367223	0.0495363	0.0896875	0	0.0461911
P-0030804-T01-IM6	0.752997	0.178133	0.0298894	0.0495045	0.0389809	0	0
P-0009005-T01-IM5	0.00885183	0.810098	0.177894	0.0493038	0.000994225	1.06e-06	0.00216192
P-0025093-T01-IM6	0.800696	0.0948119	0.0465779	0.0490301	0.0532791	0	0.00463484
P-0002465-T01-IM3	0.0449983	0.0116663	0.631184	0.0489977	0.0351755	0	0.276976
P-0007918-T01-IM5	0.0205731	0.979416	7.53e-06	0.0487875	3.8e-06	2.01e-14	3.53e-08
P-0003964-T01-IM3	0.178665	0.00155559	0.570653	0.0487395	0.240254	0	0.00887213
P-0010008-T01-IM5	0.267144	0.021717	0.542979	0.0487079	0.142017	0	0.0261427
P-0024605-T01-IM6	0.0293387	0.739311	0.1234	0.0483803	0.0114273	3.57e-06	0.0965231
P-0005851-T01-IM5	0.012303	0.5468	0.407474	0.0479856	0.0054686	0	0.0279546
P-0025853-T01-IM6	0.26499	0.093388	0.50456	0.0475	0.0917729	0	0.0452896
P-0021121-T01-IM6	0.812972	0.0239566	0.0800492	0.0474461	0.0827693	0	0.000252974
P-0001388-T01-IM3	0.303363	0.0266642	0.33965	0.0473944	0.24061	0	0.089713
P-0000898-T01-IM3	0.165768	0.070912	0.564192	0.0473555	0.115525	0	0.0836025
P-0009263-T01-IM5	0.000520619	0.863056	0.136414	0.0472452	4.36e-06	0	5.6e-06
P-0021504-T01-IM6	0.0183044	0.797952	0.165544	0.0471846	0.00327391	3.39e-05	0.0149259
P-0000702-T01-IM3	0.00335904	0.670726	0.324541	0.0470905	0	0	0.00137466
P-0007405-T01-IM5	0.14249	0.186618	0.49968	0.0376968	0.0926557	0.00936007	0.0785561
P-0009680-T01-IM5	0.00875316	0.27002	0.610902	0.0468915	0.00755232	0	0.102772
P-0009292-T01-IM5	0.0343111	0.377299	0.260274	0.0467619	0.0536238	0.000109666	0.274492
P-0033074-T01-IM6	0.270506	0.0959076	0.507534	0.046778	0.0959224	0	0.0301297
P-0012908-T01-IM5	0.291282	0.372516	0.218823	0.0465987	0.0766065	0	0.040773
P-0025565-T01-IM6	0.0282421	0.296968	0.0668236	0.0459383	0.0423977	0	0.565569
P-0015521-T01-IM6	0.919822	0.0376685	0.0119895	0.0458489	0.0303309	0	0.000189494
P-0005266-T01-IM5	0.492806	0.225425	0.133615	0.0449815	0.124084	0	0.02407
P-0001598-T01-IM3	0.0014795	0.945403	0.053021	0.0445448	0	0	9.61e-05
P-0005222-T01-IM5	0.141131	0.826222	0.0300234	0.0438749	0.00262353	0	0
P-0017687-T01-IM6	0.700447	0.0132241	0.140497	0.0435036	0.13695	0	0.00888186
P-0002320-T01-IM3	0.27828	0.0609082	0.539756	0.0431786	0.0767698	0	0.0442855
P-0019914-T02-IM6	0.00633915	0.437598	0.553784	0.0429899	0	0	0.00227907
P-0007622-T01-IM5	0.00267395	0.872638	0.124689	0.0428552	0	0	0
P-0002614-T01-IM3	0.106554	0.485253	0.287461	0.0427307	0	0	0.120733
P-0025608-T01-IM6	0.475229	0.122948	0.296124	0.0426581	0.0897895	0	0.0159096
P-0003560-T01-IM5	0.00051952	0.999479	1.52e-06	0.0426527	1.66e-09	5.78e-13	5.45e-11
P-0003620-T02-IM5	0.0191695	0.974267	0.00638953	0.0424228	0.000128907	6.69e-08	4.55e-05
P-0007493-T02-IM5	0.0910363	0.00744758	0.679688	0.0420373	0.21084	0	0.0109882
P-0023973-T01-IM6	0.377963	0.593425	0.0167597	0.0417635	0.0114572	0	0.000394304
P-0007556-T01-IM5	0.0709367	0.36324	0.517604	0.0412445	0.0296027	0	0.0186164
P-0025956-T01-IM6	0.296124	0.00915839	0.534259	0.0409778	0.145705	0	0.0147531
P-0024305-T01-IM6	0.0293745	0.964317	0.00587003	0.0409385	0.000438324	1.17e-05	0
P-0020382-T01-IM6	0.00610477	0.992634	0.00125711	0.0409024	3.81e-06	0	3.08e-07
P-0006624-T01-IM5	0.607995	0.311186	0.0344898	0.0407607	0.044671	0	0.00165779
P-0019036-T01-IM6	0.315607	0.0381238	0.468737	0.0403141	0.155761	0	0.021771
P-0007114-T01-IM5	0.154988	0.0125775	0.703134	0.0399599	0.119738	0.000329039	0.00956338
P-0012408-T01-IM5	0.17368	0.25711	0.501308	0.0402192	0.0477598	0	0.0201421
P-0008595-T01-IM5	0.000971259	0.548135	0.450839	0.0396568	1.42e-05	0	4.12e-05
P-0000547-T01-IM3	0.249105	0.11202	0.483327	0.0388311	0.0909204	0	0.0646275
P-0021403-T01-IM6	0.501322	0.0680662	0.258331	0.0386653	0.158794	0	0.0134873
P-0022808-T01-IM6	0.0180859	0.530338	0.306106	0.0383869	0	0	0.14547
P-0010636-T01-IM5	0.369931	0.0105661	0.433526	0.0370854	0.175984	0	0.00999247
P-0021841-T01-IM6	0.00158039	0.806674	0.190844	0.0369956	0	0	0.000900794
P-0006773-T01-IM5	0.358569	0.0587252	0.457248	0.0369066	0.107496	0	0.0179619
P-0022952-T01-IM6	0.530393	0.0828351	0.281103	0.0364428	0.0989331	0	0.00673491
P-0005792-T01-IM5	0.0151783	0	0.399714	0.0363048	0.268606	0	0.316501
P-0003635-T01-IM5	0.00361537	0.946812	0.047592	0.0360082	0	0	0.00198046
P-0008557-T02-IM5	0.125787	0.874158	3.09e-05	0.0352199	2.39e-05	0	3.48e-07
P-0015716-T01-IM6	0.0020423	0.787708	0.207797	0.034915	0	0	0.00245223
P-0007876-T01-IM5	0.870983	0.12821	0.000246744	0.0347431	0.000560316	0	0
P-0028993-T01-IM6	0.345213	0.617317	0.0141857	0.0345818	0.0215185	8.15e-06	0.00176586
P-0000062-T01-IM3	0.136087	0.0944062	0.497826	0.0343477	0.0738606	0	0.19782
P-0002351-T01-IM3	0.0433312	0.266124	0.67408	0.0340611	0.00926319	0	0.00720217
P-0000895-T01-IM3	0.101214	0.362412	0.386239	0.0331008	0.0523178	0.000947423	0.0978167
P-0006423-T01-IM5	0.236519	0.522084	0.195902	0.0337744	0.0289939	2.4e-05	0.0165014
P-0001603-T01-IM3	0.770189	0.169378	0.0143141	0.0333377	0.0457437	0	0.000374775
P-0016290-T01-IM6	0.0976725	0.22649	0.621937	0.0332936	0.037699	0	0.0162009
P-0000646-T02-IM3	0.937537	0.0611058	8.85e-05	0.0332223	0.00126871	0	0
P-0013448-T01-IM5	0.53859	0.123544	0.21984	0.0328905	0.107786	0	0.0102399
P-0021174-T01-IM6	0.149168	0.83967	0.00764343	0.0327777	0.00333629	6.95e-06	0.000182277
P-0003131-T01-IM5	0.00897113	0.416154	0.568981	0.0326585	0.00302205	0	0.00287201
P-0013413-T01-IM5	0.781699	0.176117	0.0289692	0.0324626	0.0129739	0	0.000241267
P-0000235-T01-IM3	0.084174	0.0404602	0.502815	0.0324225	0.0795441	0	0.293007
P-0003368-T01-IM5	0.322594	0.00503023	0.439694	0.0323428	0.227857	0	0.00482549
P-0010238-T01-IM5	0.0991958	0.00291835	0.19538	0.0274303	0.253789	0.00483749	0.448717
P-0017766-T01-IM6	0.206538	0.399313	0.323336	0.0320192	0.0389242	0	0.031888
P-0018028-T01-IM6	0.00220778	0.706219	0.287254	0.0319288	0	0	0.0043191
P-0036260-T01-IM6	0.071477	0.922418	0.00510681	0.0317761	0.00067693	2.29e-05	0.000321521
P-0012407-T01-IM5	0.188358	0.791923	0.0172613	0.0317221	0.00207516	0	0.000382656
P-0031640-T01-IM6	0.012101	0.987843	5.42e-05	0.0311276	1.28e-06	0	2.65e-07
P-0020542-T01-IM6	0.244888	0.0428837	0.633233	0.0310933	0.0675888	0	0.0114061
P-0011378-T01-IM5	0.178733	0.00300827	0.605843	0.0310363	0.207388	0	0.00502713
P-0015660-T01-IM6	0.0048506	0.297656	0.694438	0.0307384	0	0	0.00305524
P-0039415-T01-IM6	0.255178	0.741905	0.00158392	0.0306443	0.00131603	1.86e-08	1.72e-05
P-0004348-T01-IM5	0.0581214	0.940974	0.00064376	0.0305344	0.000251061	3.66e-07	1.01e-05
P-0011453-T01-IM5	0.119516	0.0689345	0.548247	0.0234925	0.110721	0.00701099	0.152582
P-0002738-T01-IM3	0.000889805	0.791491	0.206732	0.030431	0	0	0.000887486
P-0015251-T01-IM6	0.061018	0.000233883	0.0283885	0.0303834	0.0948609	0	0.815499
P-0025766-T01-IM6	0.473923	0.0121689	0.343342	0.0296805	0.157183	0	0.0133826
P-0007293-T01-IM5	0.081971	0	0.158946	0.0288359	0.226956	0.000776096	0.532126
P-0010252-T01-IM5	0.122931	0.249856	0.578089	0.0295878	0	0	0.0491245
P-0007561-T01-IM5	0.287362	0.709967	0.00108285	0.0293999	0.00155539	0	3.3e-05
P-0019298-T01-IM6	0.183898	0.191644	0.440045	0.0293009	0.122246	0	0.0621672
P-0022502-T01-IM6	0.0284043	0.956947	0.0141564	0.0292409	0.00049215	1.56e-06	0
P-0014910-T01-IM6	0.00980709	0.972854	0.0167939	0.0291107	6.55e-05	0	0.000479862
P-0014418-T01-IM6	0.00144647	0.940514	0.0576983	0.0288688	0	0	0.000341441
P-0036733-T01-IM6	0.000339929	0.99966	1.37e-07	0.0288351	5.3e-10	2.37e-19	1.23e-11
P-0018511-T01-IM6	0.197501	0.0789127	0.651171	0.0284857	0.0610564	0	0.0113587
P-0008659-T01-IM5	0.473289	0.00938267	0.395516	0.0282375	0.109399	0	0.0124131
P-0003921-T01-IM5	0.283533	0.464567	0.198822	0.0280442	0.0322909	3.89e-06	0.0207866
P-0017599-T01-IM5	0.0264627	0.564635	0.376134	0.0273688	0.0134755	0.000661588	0.0192927
P-0009161-T01-IM5	0.000207244	0.206952	0.792662	0.0279224	0	0	0.000178787
P-0015067-T01-IM6	0.00930525	0.804606	0.183479	0.0276757	0.00100186	0	0.00160878
P-0025657-T02-IM6	0.122955	0.0235254	0.780681	0.0276729	0.0728379	0	0
P-0016062-T01-IM6	0.00285883	0.531905	0.462942	0.0276697	0	0	0.00229352
P-0009483-T01-IM5	0.378788	0.222294	0.193947	0.0275732	0.173814	0	0.0311569
P-0010816-T01-IM5	0.0883995	0.110305	0.721911	0.0274626	0.0600221	0	0.0193625
P-0018843-T01-IM6	0.0503122	0.949269	0.000354811	0.026945	6.43e-05	3.13e-10	0
P-0009106-T01-IM5	0.0216553	0.818295	0.158199	0.0268969	0.000980226	0	0.000869977
P-0031887-T01-IM6	0.0145944	0.98267	0.00259076	0.0261922	9.69e-05	0.000449697	4.8e-05
P-0002380-T01-IM3	0.462036	0.0083186	0.429875	0.0264276	0.0956423	0	0.00412874
P-0021834-T01-IM6	0.312636	0.020205	0.501379	0.0264194	0.125082	0	0.0406988
P-0002575-T01-IM3	0.260974	0.136085	0.474441	0.0259094	0.0960582	0	0.0324427
P-0027808-T01-IM6	0.136874	0.844625	0.0160097	0.025424	0.00249204	2.45e-07	0
P-0009910-T01-IM5	0.0655096	0.548346	0.38088	0.0253187	0.00526461	0	0
P-0006540-T01-IM5	0.53372	0.00918646	0.294085	0.0252685	0.149393	0	0.0136155
P-0018927-T01-IM6	0.1854	0.0214951	0.400301	0.0252267	0.261734	0	0.13107
P-0017769-T01-IM6	0.0333053	0.770135	0.19147	0.0250563	0.00508985	0	0
P-0015780-T01-IM6	0.175095	0.0158099	0.608922	0.021019	0.160358	0.00394054	0.039815
P-0015917-T01-IM6	0.166861	0.831945	0.000234607	0.0249555	0.000910672	0	4.85e-05
P-0007119-T01-IM5	0.00240132	4.74e-07	0.810296	0.0247663	0.187188	0	0.000114545
P-0002392-T01-IM3	0.0382216	0.961482	0.000253391	0.024754	4.19e-05	6.15e-06	7.25e-07
P-0002252-T01-IM3	0.0354073	0.000543583	0.774071	0.0247408	0.17647	0	0.0135083
P-0007620-T01-IM5	0.0143115	0.525721	0.429943	0.0244647	0.0068812	0	0.0231437
P-0018078-T01-IM6	0.138787	0.127412	0.645474	0.0244442	0.0883278	0	0
P-0014465-T01-IM6	0.144607	0.0342711	0.741681	0.0244324	0.0451578	0	0.0342826
P-0019407-T01-IM6	0.0406868	0.418215	0.44384	0.0241518	0.0122338	0	0.085025
P-0017712-T01-IM6	0.0527351	0.401763	0.512764	0.0241271	0.0208615	0	0.011876
P-0040090-T01-IM6	0.565096	0.14672	0.161873	0.0239757	0.116326	0	0.00998509
P-0018722-T01-IM6	0.196597	0.000518853	0.357711	0.0236043	0.418287	0	0.026886
P-0000057-T01-IM3	0.0388135	0.6399	0.289534	0.023603	0.0141715	0	0.0175815
P-0003620-T01-IM5	0.046826	0.946364	0.00626675	0.0234881	0.000459026	1.6e-07	8.43e-05
P-0021915-T01-IM6	0.214853	0.469746	0.262705	0.0234762	0.0355635	0	0.0171322
P-0016197-T01-IM6	0.00443204	0.994608	0.000945886	0.0234647	2.79e-06	0	1.14e-05
P-0017781-T01-IM6	0.449453	0.111914	0.302201	0.0234199	0.0955801	0	0.0408519
P-0010805-T01-IM5	0.00209511	0.99041	0.00746597	0.0232023	1.24e-05	3.86e-10	1.69e-05
P-0025313-T01-IM6	0.00480441	0.78683	0.206146	0.0231536	0	0	0.00222017
P-0038279-T01-IM6	0.0134964	0.986481	2.16e-05	0.0229959	1.35e-06	0	0
P-0007925-T01-IM5	0.0636113	0.0536845	0.816752	0.0229954	0.0469753	0	0.018977
P-0014458-T01-IM6	0.14013	0.0197054	0.715385	0.0226272	0.0937295	0	0.0310504
P-0020156-T01-IM6	0.0281765	0.74213	0.227337	0.022604	0.00145431	0	0.000902904
P-0008851-T01-IM5	0.102255	0.00273881	0.778969	0.0224645	0.108407	0	0.00762974
P-0022847-T01-IM6	0.0380615	0	0.591257	0.0221643	0.0477369	0	0.322944
P-0013956-T01-IM5	0.0924807	0.0116889	0.827318	0.0220827	0.0552376	0	0.0132752
P-0014172-T01-IM5	0.0101404	0.0081486	0.976416	0.0216682	0.0043453	0	0.000949842
P-0033935-T01-IM6	0.0808293	0.919158	7.09e-06	0.0216149	5.52e-06	0	3.41e-09
P-0010760-T01-IM5	0.0373019	0.540228	0.42247	0.0215884	0	0	0
P-0006193-T01-IM5	0.14722	0.660922	0.163593	0.0214488	0.0184723	1.62e-05	0.00979265
P-0014421-T01-IM6	0.00339146	0.849028	0.143659	0.0212932	0	0	0.00392133
P-0021708-T01-IM6	0.0267516	0.973248	1.98e-08	0.0212718	1.47e-08	1e-23	9.02e-13
P-0005928-T01-IM5	0.582545	0.0636941	0.204964	0.0212337	0.146749	0	0.00204801
P-0033654-T01-IM6	0.255493	0.744452	1.27e-05	0.0211587	4.25e-05	0	1.34e-07
P-0022140-T01-IM6	0.069942	0.558019	0.333868	0.0211199	0.0206657	3e-06	0.0175056
P-0022384-T01-IM6	0.757522	0.0375265	0.130783	0.0210671	0.0535065	0	0.0206623
P-0027626-T01-IM6	0.544072	0.0364736	0.229688	0.0210281	0.180569	0	0.009197
P-0032079-T01-IM6	0.0309324	0.958639	0.00975172	0.0210179	0.000496472	2.33e-07	0.000180164
P-0005370-T01-IM5	0.107348	0.180592	0.195607	0.0209461	0.0939615	0	0.422492
P-0005118-T01-IM5	0.279023	0.709226	0.00795022	0.0204777	0.00380064	0	0
P-0007484-T01-IM5	0.273273	0.00713487	0.227055	0.015326	0.214233	0.00508295	0.278305
P-0007068-T01-IM5	0.0226346	0.0132938	0.939257	0.0203206	0.0205847	0	0.00422982
P-0020140-T02-IM6	0.0721307	0.00281744	0.674616	0.0202493	0.229088	0	0.0213485
P-0025373-T01-IM6	0.0189319	0.958886	0.0216378	0.0201829	0.000544	0	0
P-0008528-T01-IM5	0.00362311	0.89434	0.100613	0.0201737	0.000448447	0	0.000975272
P-0021696-T01-IM6	0.0772596	0.0578058	0.83506	0.0198995	0.0235553	0	0.00631909
P-0018599-T01-IM6	0.980679	0.000114335	0.000364466	0.0197189	0.0188416	0	5.26e-07
P-0017658-T01-IM5	0.00154052	0.587161	0.411117	0.0197169	0	0	0.000181715
P-0003811-T01-IM5	0.216917	0.0836256	0.505161	0.0196131	0.169114	0	0.0251823
P-0005627-T02-IM5	0.0430297	0.859669	0.0962797	0.0195301	0.00102111	0	0
P-0014772-T01-IM6	0.00580321	0.230436	0.756797	0.0194293	0.00302999	0	0.00393419
P-0021507-T01-IM6	0.255201	0.00297897	0.547579	0.0194125	0.188444	0	0.00579617
P-0010249-T01-IM5	0.686119	0.255539	0.0217147	0.019345	0.0358621	0	0.000765668
P-0028040-T01-IM6	0.591281	0.187858	0.148331	0.0191966	0.0696874	0	0.00284291
P-0006267-T01-IM5	0.382591	0.609055	0.00359982	0.0191036	0.00472557	4.49e-08	2.84e-05
P-0015213-T01-IM6	0.149989	0.0572416	0.688054	0.0191001	0.0732632	0	0.0314525
P-0006557-T01-IM5	0.358038	0.157828	0.353775	0.0188185	0.114266	0.000275202	0.0160929
P-0024070-T01-IM6	0.304257	0.69421	0.000671492	0.0190436	0.000852384	0	9.97e-06
P-0027664-T01-IM6	0.0804538	0.0152978	0.792176	0.0190001	0.0924308	0	0.0196419
P-0001830-T01-IM3	0.107788	0.0311491	0.736594	0.0189822	0.0807657	0	0.0437034
P-0006768-T02-IM5	0.0956172	0.788796	0.105407	0.0188845	0.00848943	0	0.00168988
P-0008080-T01-IM5	0.395039	0.591457	0.00296425	0.0187767	0.00937026	0	0.00116983
P-0008248-T01-IM5	0.0332541	0.26343	0.668442	0.0187631	0.0189221	0	0.0159517
P-0027673-T01-IM6	0.203618	0.000741069	0.704902	0.0186118	0.0837623	0	0.00697649
P-0008403-T01-IM5	0.0269107	0.972136	0.000815545	0.0185485	0.000124026	4.39e-05	1.37e-05
P-0014137-T01-IM5	0.0724005	0.912468	0.0147827	0.0185347	0.000322767	0	2.65e-05
P-0016562-T01-IM6	0.00233038	0.744741	0.252271	0.0183602	0.000211837	0	0.000446054
P-0003119-T01-IM5	0.00952667	0	0.609004	0.0182349	0.173842	0	0.207627
P-0034392-T01-IM6	0.279779	0.181954	0.409234	0.0177449	0.0946692	0	0.0343641
P-0018960-T01-IM6	0.286542	0.00248364	0.554884	0.0176828	0.125756	0	0.0303349
P-0004395-T01-IM5	0.0548153	0	0.746691	0.0170429	0.0868073	0	0.111687
P-0006728-T01-IM5	0.125134	0.225491	0.582745	0.0169918	0.0571704	0	0.00945985
P-0020913-T01-IM6	0.0744722	0.912716	0.0106737	0.0169153	0.00205976	1.18e-05	7.87e-05
P-0034234-T01-IM6	0.027461	0.756347	0.0139283	0.0167632	0.00226913	0.000141513	0.199995
P-0004518-T01-IM5	0.129921	0.82565	0.0135859	0.0168027	0.00796516	5.32e-09	0.0228777
P-0015895-T01-IM6	0.369278	0.588722	0.0256318	0.0166529	0.0135337	0	0.00283395
P-0015415-T01-IM6	0.00186677	0.998133	8.79e-08	0.0163481	2.03e-10	0	7.81e-13
P-0013679-T01-IM5	0.171949	0.668274	0.0689076	0.0158397	0.0426438	0.000401581	0.0482263
P-0015718-T01-IM6	0.0144014	0.981824	0.00361095	0.0162097	0.00016332	1.11e-07	0
P-0020995-T01-IM6	0.024157	0.204664	0.760213	0.0160471	0.0109656	0	0
P-0018600-T01-IM6	0.0504103	0.949589	1.16e-07	0.0158632	6.78e-07	0	3.03e-10
P-0008935-T01-IM5	0.40703	0.0485289	0.35326	0.0155436	0.165226	0.000213918	0.0259556
P-0004272-T01-IM5	0.388428	0.0205956	0.361236	0.0154931	0.220751	0	0.00898934
P-0001223-T01-IM3	0.00521031	0.907359	0.0856614	0.015226	0	2.54e-05	0.00176906
P-0005289-T01-IM5	0.0681994	0.022576	0.793556	0.0150789	0.0765361	0	0.0391325
P-0000739-T01-IM3	0.0212365	0.245249	0.708507	0.0150732	0.0116819	0	0.0133264
P-0022949-T01-IM6	0.169817	0.012228	0.650391	0.0146755	0.151647	0	0.0159168
P-0023510-T01-IM6	0.00909609	0.990893	1.02e-05	0.0144997	2.4e-07	0	2.97e-10
P-0005320-T01-IM5	0.241398	0.0149686	0.485432	0.0144389	0.241991	0	0.0162105
P-0017361-T01-IM6	0.319386	0.646094	0.0273113	0.0143872	0.00702008	0	0.000188897
P-0012282-T01-IM5	0.468673	0.128331	0.200092	0.014374	0.177543	0	0.0253607
P-0009349-T01-IM5	0.242201	0.75597	0.00101663	0.0142226	0.000801618	1.01e-08	1.08e-05
P-0007388-T01-IM5	0.131139	0.00178951	0.694255	0.0140228	0.147376	0	0.0254409
P-0007083-T02-IM6	0.00420797	0.485309	0.509212	0.0139464	0.000353498	0	0.000917804
P-0002826-T01-IM3	0.255925	0.000313122	0.412304	0.0139306	0.328303	0	0.0031549
P-0012107-T01-IM5	0.240534	0.451885	0.272696	0.01359	0.0348856	0	0
P-0032650-T01-IM6	0.00901881	0.990949	3.17e-05	0.0133449	2.99e-07	1.18e-18	1.3e-09
P-0028078-T01-IM6	0.0126608	0.966474	0.0191367	0.012228	0.000805	0.00108851	0.00092334
P-0006952-T01-IM5	0.644982	0.182663	0.0835134	0.0130521	0.0888409	0	0
P-0021484-T01-IM6	0.0133124	0.495444	0.443937	0.0130201	0.0104027	0	0.0369039
P-0001841-T01-IM3	0.20445	0.283651	0.339919	0.0126142	0.074042	0.0002275	0.0979378
P-0004457-T01-IM5	0.0174389	0.981217	0.00131485	0.012734	2.23e-05	0	6.71e-06
P-0014392-T01-IM6	0.0115659	0.987766	0.000658903	0.0125972	8.25e-06	5.41e-12	5.55e-07
P-0013233-T01-IM5	0.120728	0.0140938	0.46239	0.0125464	0.228117	0	0.174672
P-0000063-T01-IM3	0.000227434	0.871029	0.128733	0.0125168	0	0	1.11e-05
P-0014015-T01-IM5	0.0588791	0.260244	0.666332	0.012323	0.0145444	0	0
P-0020835-T01-IM6	0.0356745	0.350278	0.590257	0.0123005	0.00622378	0	0.017566
P-0030209-T01-IM6	0.860374	0.104803	0.00874367	0.0120463	0.0258878	0	0.000191454
P-0003224-T01-IM5	0.00227628	0.824811	0.172441	0.0120071	9.11e-05	0	0.000380378
P-0024110-T01-IM6	0.114902	0.0155269	0.801996	0.0116339	0.0510035	0	0.0165713
P-0026958-T01-IM6	0.0113772	0.329314	0.618376	0.0115932	0.0146769	0	0.0262563
P-0002279-T01-IM3	0.265416	0.0240156	0.612155	0.0114699	0.0836598	0	0.0147541
P-0027084-T01-IM6	0.172976	0.175895	0.635277	0.0114424	0.0113034	0	0.00454822
P-0029465-T01-IM6	0.0406031	0	0.67218	0.0113635	0.0998691	0	0.187348
P-0023557-T01-IM6	0.267876	0.0674893	0.506241	0.0111198	0.138605	0.00024119	0.0197885
P-0009066-T01-IM5	0.289999	0.0133436	0.517065	0.0113269	0.173378	0	0.00621387
P-0003247-T01-IM5	0.27149	0.0438721	0.521158	0.0111813	0.143659	0	0.0198214
P-0008328-T01-IM5	0.000934852	0.772718	0.226079	0.0108557	0	0	0.000268211
P-0011594-T01-IM5	0.0319446	0.953032	0.0138257	0.0108208	0.000874183	4.82e-06	0.000323468
P-0020047-T01-IM6	0.0775016	0.057685	0.431432	0.0107696	0.147911	0	0.285471
P-0016174-T01-IM6	0.00049807	0.605251	0.394182	0.010741	1.19e-05	0	5.69e-05
P-0002151-T01-IM3	0.1047	0.00223765	0.708423	0.0107002	0.171305	0	0.013335
P-0001365-T02-IM3	0.394177	0.0333471	0.159719	0.0106514	0.236737	0	0.17602
P-0012729-T01-IM5	0.149545	0.00329771	0.720651	0.010546	0.119012	0	0.00749528
P-0027343-T01-IM6	0.00494555	0.909825	0.0849894	0.0105116	0.000239886	0	0
P-0015904-T01-IM6	0.125607	0.00241536	0.10904	0.0104921	0.407995	0	0.354942
P-0015955-T01-IM6	0.158061	0.00232956	0.594271	0.01048	0.194447	0	0.0508908
P-0020127-T01-IM6	0.307055	0.338962	0.268772	0.0102726	0.0703791	0	0.014832
P-0030135-T01-IM6	0.544091	0.0470554	0.210659	0.00986247	0.19054	0	0.00765576
P-0002731-T02-IM5	0.067963	0.0172918	0.870485	0.00962152	0.039856	0	0.00440399
P-0017637-T01-IM5	0.0135556	0.383102	0.588458	0.00957763	0.00995944	0	0.00492516
P-0013313-T01-IM5	0.19607	0.00453652	0.467417	0.00853387	0.141106	0.00103472	0.190871
P-0012860-T01-IM5	0.00223188	0.997768	1.43e-10	0.00956005	1.53e-11	7.93e-22	2.02e-16
P-0003347-T01-IM5	0.0894742	0.00211273	0.804182	0.00951904	0.0803393	0	0.0238921
P-0006097-T01-IM5	0.0121603	0.328483	0.650789	0.00943665	0.00391471	0	0.00465276
P-0012551-T01-IM5	0.615643	0.195294	0.0817369	0.00938907	0.0990466	0	0.00827971
P-0000268-T01-IM3	0.00250619	0.693461	0.301815	0.00927905	0.0011216	0	0.00109638
P-0016347-T01-IM6	0.0044557	0.995187	0.000350593	0.00911076	6.09e-06	0.000155866	2.69e-07
P-0024764-T01-IM6	0.397942	0.00605203	0.419978	0.00907828	0.173637	0	0.00239138
P-0003711-T01-IM5	0.109168	0.23395	0.596804	0.00891762	0.0503219	0	0.00975634
P-0025347-T01-IM6	0.0183321	0.9773	0.00359851	0.00871902	0.000120584	6.18e-06	0.000648313
P-0020307-T01-IM6	0.934271	0.0656483	9.77e-07	0.00870306	7.95e-05	0	4.34e-09
P-0017749-T01-IM6	0.115272	0.0246095	0.745506	0.008702	0.0641506	0	0.0504618
P-0023598-T01-IM6	0.000146814	0.0911598	0.908581	0.00866491	2.77e-05	0	8.52e-05
P-0003024-T01-IM3	0.000203031	0.765541	0.234195	0.00865485	5.19e-07	0	5.99e-05
P-0023948-T01-IM6	0.195758	0.0046479	0.605203	0.00863329	0.190182	0	0.00421
P-0006343-T01-IM5	0.0480353	0.0843871	0.815644	0.00862123	0.0284832	0	0.0234504
P-0031286-T01-IM6	0.0425863	0.956081	0.00129385	0.00861622	3.24e-05	0	6.94e-06
P-0005354-T01-IM5	0.0167137	0.00569744	0.900758	0.0085148	0.0190159	0	0.0578149
P-0010736-T01-IM5	0.100695	0.00190995	0.885548	0.00837691	0.0106836	0	0.0011633
P-0018444-T01-IM6	0.869387	0.0647123	0.0171181	0.00829321	0.0471789	0	0.00160413
P-0023425-T01-IM6	0.000299182	0.630838	0.368729	0.00819838	0	0	0.000133535
P-0009110-T01-IM5	0.0965038	0.00280252	0.590517	0.00815248	0.292412	0	0.017765
P-0012870-T03-IM6	0.027938	0.605757	0.359388	0.00814953	0.00456203	0	0.00235488
P-0028723-T01-IM6	0.222084	0.00101013	0.305154	0.00808878	0.459505	0	0.0122471
P-0029298-T01-IM6	0.26959	0.112945	0.417916	0.00806589	0.1921	0	0.0074496
P-0010937-T01-IM5	0.0308408	0.968079	0.000914877	0.008007	0.00015977	0	5.73e-06
P-0012846-T01-IM5	0.122975	0.0250347	0.663423	0.00798696	0.164054	0	0.0245138
P-0014451-T01-IM6	0.0428196	0.000925168	0.734273	0.00783145	0.176675	0	0.0453074
P-0023553-T01-IM6	0.739762	0.05345	0.0533167	0.00768555	0.151428	0	0.00204415
P-0022011-T01-IM6	0.0995885	0.00420567	0.616455	0.00767177	0.22278	0	0.056971
P-0012780-T01-IM5	0.0340171	0.0249933	0.800602	0.0075284	0.0499453	0	0.0904424
P-0028631-T01-IM6	0.0823409	0.917553	6.54e-05	0.0075209	4.05e-05	8.49e-13	3.12e-07
P-0004240-T01-IM5	0.000581899	0.927656	0.0708885	0.00748777	0	0	0.000873207
P-0008295-T01-IM5	0.316261	0.0246184	0.392002	0.00745543	0.227919	0	0.0391988
P-0004650-T01-IM5	0.000440695	0.999559	2.43e-07	0.00730336	3.67e-10	1.56e-23	0
P-0018188-T01-IM6	0.412194	0.0862167	0.309765	0.00728302	0.178205	0	0.0136187
P-0018820-T01-IM6	0.115352	0.0769723	0.619313	0.00601132	0.166626	0.00125233	0.0217367
P-0014599-T01-IM6	0.095511	0.000893879	0.804554	0.00712403	0.0862076	0	0.0128331
P-0019607-T02-IM6	0.092055	0.181	0.703358	0.00712264	0.0235863	0	0
P-0015937-T01-IM6	0.0013032	0.427388	0.570526	0.00685779	0	0	0.000782765
P-0021783-T01-IM6	0.270907	0.727428	0.00149255	0.00678788	0.000172699	0	0
P-0014402-T01-IM6	0.00117057	0.706279	0.284086	0.00677197	0.000296765	1.72e-08	0.00816829
P-0015959-T01-IM6	0.250477	0.68643	0.0288574	0.0067682	0.0287802	3.12e-11	0.00545592
P-0008874-T01-IM5	0.164144	0.00123805	0.698729	0.00671421	0.127241	0	0.00864745
P-0021046-T01-IM6	0.951002	0.0463043	0.000246631	0.00650867	0.00244614	0	6.24e-07
P-0006768-T01-IM5	0.0232147	0.76289	0.209982	0.00650272	0.00391314	0	0
P-0013278-T01-IM5	0.0154758	0.540594	0.432208	0.00649546	0.00249364	0	0.00922898
P-0014909-T01-IM6	0.158888	0.296469	0.4213	0.00648626	0.0508752	0	0.0724684
P-0004050-T01-IM3	0.0418062	0.0139121	0.367106	0.00602013	0.157534	0.000448433	0.419642
P-0038372-T01-IM6	0.22385	0.775014	0.000348716	0.00640565	0.000785042	5.69e-09	2.12e-06
P-0024263-T01-IM6	0.00370091	0.746242	0.247303	0.0063372	0.00119307	4.47e-07	0.00156085
P-0008784-T02-IM5	0.0582878	0.0260209	0.744444	0.00624641	0.0347111	8.14e-06	0.136536
P-0015830-T01-IM6	0.00215189	0.997678	0.000169836	0.00624765	9.73e-08	0	9.34e-10
P-0033097-T01-IM6	0.453852	0.186549	0.267052	0.00619088	0.0904918	0	0.00205433
P-0008434-T01-IM5	0.000974016	0.999023	2.67e-06	0.00613695	2.34e-08	5.97e-20	7.88e-09
P-0003596-T01-IM5	0.000106069	0.976054	0.0237604	0.00606795	0	0	7.96e-05
P-0000596-T01-IM3	0.256133	0.73536	0.00711257	0.00590279	0.00139415	1.33e-12	0
P-0006541-T01-IM5	0.206698	0.750186	0.0364	0.00589111	0.00655823	0	0.000157808
P-0005456-T01-IM5	0.0020854	0.599158	0.397195	0.00585713	0.000734869	0	0.000826533
P-0011254-T01-IM5	0.108009	0.0492802	0.75973	0.00574799	0.0653908	0	0.0175901
P-0021454-T01-IM6	0.13271	0.00233003	0.605402	0.00574605	0.235111	0	0.0244477
P-0007879-T01-IM5	0.112639	0.00284424	0.760357	0.00573487	0.107353	0	0.0168075
P-0019258-T01-IM6	0.00105347	0.551825	0.446264	0.00571347	0	0	0.000857007
P-0003872-T01-IM5	0.753552	0.103815	0.115174	0.00562585	0.0270665	0	0.000391977
P-0018233-T01-IM6	0.265875	0.0790141	0.353725	0.00560791	0.0756157	0	0.22577
P-0019101-T01-IM6	0.0800686	0.000760185	0.715448	0.00553747	0.203277	0	0.000446189
P-0036095-T01-IM6	0.510243	0.488941	0.000170084	0.00553445	0.000645359	0	1.03e-06
P-0019647-T01-IM6	0.00459851	0.658275	0.332292	0.00545694	0	0	0.00483444
P-0025544-T01-IM6	0.302301	0.22979	0.393256	0.00542991	0.041618	0	0.033035
P-0000865-T01-IM3	0.00645654	0.988584	0.00479433	0.00534302	6.32e-05	8.65e-05	0.000102224
P-0008976-T01-IM5	0.0295553	0.131173	0.807384	0.00539388	0.0186935	0	0.0131948
P-0018563-T01-IM6	0.578654	0.0470097	0.254774	0.00532356	0.100258	0	0.0193047
P-0002504-T01-IM3	0.000680566	0.999254	6.5e-05	0.00524868	6.95e-08	4.13e-11	6.22e-09
P-0008848-T01-IM5	0.000459136	0.587855	0.411107	0.00512015	0	0	0.000578279
P-0010232-T01-IM5	0.504105	0.290261	0.145681	0.00506876	0.0578148	0	0.00213806
P-0013111-T01-IM5	0.267917	0.0415192	0.541755	0.00502482	0.134513	0	0.0142952
P-0014242-T01-IM6	0.0204974	0.979461	3.56e-05	0.00501966	5.85e-06	1.23e-07	5.46e-08
P-0012183-T01-IM5	0.00107674	0.641623	0.355968	0.00500862	0	0	0.00133191
P-0000088-T01-IM3	0.00093667	0.607073	0.391809	0.00493442	0	0	0.000181297
P-0009532-T01-IM5	0.103345	0.000774572	0.708748	0.00492588	0.184559	0	0.00257414
P-0002639-T01-IM3	0.0827383	0.0421892	0.766017	0.00491658	0.0417392	0	0.0673164
P-0006281-T01-IM5	0.0394736	0.475159	0.480939	0.00491562	0.0023481	0	0.00208092
P-0018541-T01-IM6	0.0912566	0.059683	0.72914	0.00491255	0.0911622	0	0.0287586
P-0016692-T01-IM6	0.0352245	0.000578765	0.851676	0.00487291	0.110978	0	0.0015428
P-0025813-T01-IM6	0.578602	0.320908	0.0454582	0.00486209	0.0450499	4.83e-06	0.00998119
P-0009527-T01-IM5	0.0115492	0.782652	0.198519	0.00479064	0.00192092	5.78e-08	0.00535905
P-0007123-T01-IM5	0.0441806	0.00087858	0.71119	0.0047847	0.232096	0	0.0116546
P-0007235-T01-IM5	0.0161869	0	0.945052	0.00473049	0.0179514	0	0.0208096
P-0008944-T01-IM5	0.249346	0.0934532	0.499215	0.0047045	0.132086	0	0.0259005
P-0018561-T01-IM6	0.778239	0.22176	1.6e-09	0.00460434	5.99e-07	7.11e-19	0
P-0021231-T01-IM6	0.25171	0.0363075	0.578261	0.00443831	0.125993	0.000157847	0.00772906
P-0000184-T01-IM3	0.000153525	0.842122	0.157539	0.00458862	0	0	0.000184965
P-0002914-T01-IM3	0.319133	0.673714	0.00348362	0.00458623	0.0036687	0	0
P-0007407-T01-IM5	0.052041	0.0122474	0.781469	0.00451547	0.121705	3.46e-05	0.0325372
P-0039832-T01-IM6	0.0163429	8.84e-05	0.925081	0.00453524	0.0578882	0	0.000599862
P-0004226-T01-IM5	0.00902462	0.626561	0.364414	0.00449735	0	0	0
P-0019605-T02-IM6	0.163943	0.00630937	0.630563	0.00447308	0.174324	0	0.0248611
P-0004315-T01-IM5	0.260941	0.0162796	0.572323	0.00442233	0.13113	0	0.0193263
P-0020489-T01-IM6	0.0801247	0.17653	0.633872	0.0043539	0.0699266	0	0.0395473
P-0002160-T01-IM3	0.152207	0.00175735	0.787442	0.00432045	0.0504428	0	0.00815101
P-0004203-T01-IM5	0.199051	0.0102123	0.647179	0.00431933	0.128321	0	0.0152362
P-0009188-T01-IM5	0.000294847	0.889243	0.110027	0.00426662	0	0	0.000435091
P-0000746-T01-IM3	0.0287982	0.790922	0.177551	0.00421239	0.0027284	5.22e-07	0
P-0011187-T01-IM5	0.0658983	0.0034341	0.842212	0.00417001	0.0803563	0	0.00809894
P-0021774-T02-IM6	0.000368637	0.999631	2.13e-09	0.00414672	7.28e-12	0	8.4e-16
P-0006708-T01-IM5	0.275901	0.00951572	0.469235	0.00413651	0.235946	0	0.00940236
P-0014293-T01-IM6	0.124397	0.00052168	0.53188	0.00408145	0.340504	4.17e-06	0.00269736
P-0009747-T01-IM5	0.000738063	0.999163	9.83e-05	0.00404473	3.93e-07	1.28e-06	8.37e-08
P-0012931-T01-IM5	0.150882	0.0276436	0.677373	0.00402142	0.114463	6.89e-07	0.0296387
P-0011216-T01-IM5	0.130975	0.704572	0.15363	0.00395887	0.00780079	1.74e-06	0.00302238
P-0009108-T01-IM5	0.017481	0.982459	5.41e-05	0.00392704	6.13e-06	0	1.36e-07
P-0026723-T01-IM6	0.000158792	0.962882	0.0368813	0.0039254	0	0	7.8e-05
P-0013967-T01-IM5	0.034315	0.00156064	0.916368	0.00387149	0.0286762	0	0.0190799
P-0040848-T01-IM6	0.129105	0.0231775	0.730942	0.00382642	0.0920849	0	0.0246903
P-0003551-T02-IM6	0.000874369	0.133206	0.861724	0.00380281	9.71e-05	0	0.00409781
P-0015222-T01-IM6	0.0332419	0.0170893	0.916525	0.00365317	0.025047	0	0.00809693
P-0011546-T01-IM5	0.224123	0.00505956	0.549839	0.00361333	0.207807	0	0.013171
P-0011192-T01-IM5	0.0900261	0.0219164	0.845362	0.00358025	0.0378423	0	0.0048532
P-0005975-T01-IM5	0.0900765	0.105651	0.710492	0.00356634	0.0689874	0	0.0247933
P-0015984-T01-IM6	0.00555026	0.0217558	0.966247	0.00356335	0.00618159	0	0.000265709
P-0017683-T01-IM6	0.0249195	0.975078	1.91e-06	0.00350904	6.85e-07	7.6e-10	3.61e-10
P-0019098-T01-IM6	0.0457801	0.0299976	0.889676	0.00341089	0.0344452	0	0.000101429
P-0004495-T01-IM5	0.110259	0.00390454	0.549757	0.00337568	0.192684	0	0.143396
P-0007121-T01-IM5	0.273056	0.00262709	0.470526	0.00334713	0.233811	0	0.0199795
P-0016188-T01-IM6	0.202295	0.682236	0.0931857	0.00332848	0.0214788	0	0.000804281
P-0002637-T01-IM3	0.0848705	0.000337805	0.66285	0.003272	0.249359	2.01e-06	0.0025828
P-0023785-T01-IM6	0.0443502	0.000379726	0.755981	0.00325193	0.18523	0	0.0140587
P-0008239-T01-IM5	0.0161464	0.00134651	0.942348	0.00318614	0.0237974	0	0.0163621
P-0003972-T01-IM5	0.00378225	0.437183	0.554069	0.00317638	0.00268632	0	0.00228
P-0031665-T01-IM6	0.0752021	0.00149285	0.766729	0.00315738	0.0848374	0	0.0717389
P-0016016-T01-IM6	0.121075	0.00190181	0.586297	0.00315339	0.284818	3.06e-06	0.00590884
P-0009898-T01-IM5	0.000465908	0.586063	0.413252	0.00306603	0	0	0.000218806
P-0025354-T01-IM6	0.0586434	0.000355809	0.832359	0.00296665	0.0976218	8.59e-05	0.0110196
P-0036794-T01-IM6	0.0750787	0.272177	0.591003	0.00301751	0.0312201	0	0.0305205
P-0016258-T01-IM6	0.0779163	0.00138682	0.684652	0.00296173	0.228678	4.39e-06	0.00736706
P-0028629-T01-IM6	0.00160668	0.998381	1.2e-05	0.0029607	1.36e-07	0	1.49e-09
P-0004476-T01-IM5	0.147096	0.0266809	0.679508	0.00282026	0.127661	4.15e-05	0.019055
P-0019252-T03-IM6	0.0154104	0.0172661	0.942168	0.00277911	0.0199119	0	0.00524375
P-0007656-T01-IM5	0.00331984	0.059645	0.919646	0.00274084	0.00282431	0	0.0145648
P-0016241-T01-IM6	0.174613	0.122327	0.208453	0.00260188	0.095056	0.000138566	0.399552
P-0015749-T01-IM6	0.00297199	0.0660715	0.926855	0.00272446	0.00282639	0	0.00127549
P-0011047-T01-IM5	0.939298	0.0037078	0.0394606	0.00267185	0.0175335	0	1.3e-07
P-0012550-T01-IM5	0.000117554	0.999807	7.56e-05	0.00266062	1.05e-09	1.53e-21	1.17e-10
P-0025598-T01-IM6	0.022584	0.000177342	0.931268	0.00261252	0.0431494	0	0.00282175
P-0010088-T01-IM5	1.73e-05	0.883402	0.116578	0.00257754	0	0	2.93e-06
P-0007597-T01-IM5	0.00376685	0.0047831	0.986427	0.00257178	0.00432884	0	0.000693981
P-0009419-T01-IM5	0.05199	0.00108646	0.649702	0.00257063	0.260582	0	0.0366398
P-0006364-T01-IM5	0.055274	0.0134016	0.857232	0.00248962	0.0669602	0	0.00713222
P-0018464-T01-IM6	0.166457	0.00982438	0.727577	0.0024873	0.0820248	0	0.014117
P-0002551-T01-IM3	0.0789748	0.0114062	0.62383	0.00245645	0.230287	0	0.0555013
P-0023015-T01-IM6	0.000399131	0.658618	0.340065	0.00243209	0	0	0.000917325
P-0009020-T01-IM5	0.328943	0.000586639	0.435142	0.00238559	0.224429	0	0.0109001
P-0035638-T01-IM6	0.00282276	0.056778	0.932007	0.00238173	0.00135022	0	0.00704201
P-0000082-T01-IM3	0.0364208	0.00113085	0.924153	0.00236513	0.0326267	0	0.00566896
P-0004952-T01-IM5	0.0864727	0.908276	0.00515131	0.00232746	8.36e-05	0	1.63e-05
P-0024421-T02-IM6	0.0547445	0.00509438	0.842203	0.0022999	0.0901929	0	0.00776506
P-0035910-T01-IM6	1.14e-06	0.999999	1.92e-13	0.00222512	5.78e-17	3.98e-22	2.53e-22
P-0011149-T01-IM5	0.0291658	0.000600478	0.892083	0.00220714	0.0762446	0	0.0019061
P-0015177-T01-IM6	0.0431673	0.144073	0.795004	0.00215507	0.0127869	0	0.00496917
P-0006528-T01-IM5	0.0785664	0.0024166	0.823495	0.00215019	0.088622	0	0.00689974
P-0010603-T01-IM5	0.0712432	0.0370309	0.729859	0.0020978	0.0972648	0	0.064602
P-0039787-T01-IM6	0.0923165	0.0018373	0.808676	0.00198385	0.0838301	0	0.01334
P-0012188-T01-IM5	0.0139221	3.57e-06	0.694934	0.00198259	0.291005	0	0.000134981
P-0018656-T01-IM6	0.000776979	0.99921	1.26e-05	0.00196398	1.21e-09	0	0
P-0010257-T01-IM5	0.0580171	0.0153815	0.869631	0.00194685	0.0486926	0	0.00827771
P-0030323-T01-IM6	0.411397	0.00234395	0.248764	0.00193825	0.335517	7.49e-06	0.00197839
P-0030546-T01-IM6	0.000143755	0.997626	0.00222891	0.00185833	1.38e-07	2.03e-13	1.09e-06
P-0009638-T01-IM5	0.108489	0.0472379	0.65627	0.00184408	0.149352	0	0.0386517
P-0014556-T01-IM6	0.167277	0.800311	0.029448	0.00182002	0.00296366	3.14e-07	0
P-0000165-T01-IM3	0.0530002	0	0.367433	0.00140525	0.213064	0.000392351	0.366503
P-0021968-T01-IM6	0.0381846	0.935762	0.0242839	0.00179704	0.000692022	0	0.00107779
P-0023163-T01-IM6	0.00102649	0.998973	2.66e-08	0.00177002	1.06e-10	0	0
P-0003377-T01-IM5	9.65e-05	0.669345	0.330504	0.00175491	5.94e-06	0	4.88e-05
P-0005252-T01-IM5	0.00550753	0.000163955	0.960587	0.00174521	0.0289119	0	0.00483
P-0015296-T01-IM6	0.0376951	1.2e-06	0.788404	0.00170685	0.173879	0	2.06e-05
P-0005913-T01-IM5	0.0862595	0.00875939	0.806317	0.00167464	0.0662588	0	0.0324051
P-0014207-T01-IM6	0.0511167	0.0243664	0.890749	0.00167291	0.0337674	0	0
P-0033892-T01-IM6	0.14516	0.0361606	0.728166	0.00159007	0.0870384	0	0.00347492
P-0019804-T02-IM6	0.104432	0.00242766	0.823759	0.00156624	0.0673046	0	0.0020762
P-0005228-T01-IM5	0.000341419	0.999659	1.24e-08	0.00153191	7.8e-12	0	0
P-0027041-T01-IM6	0.0599345	0	0.758092	0.00152131	0.130349	0	0.0516249
P-0014529-T01-IM6	0.0950711	0.00246144	0.616267	0.00150229	0.241246	7.92e-07	0.0449543
P-0000704-T01-IM3	0.000147527	0.802255	0.197404	0.0014776	1.71e-05	0	0.000176286
P-0035784-T01-IM6	0.000367431	0.999632	1.63e-07	0.00145739	4.1e-10	7.06e-17	1.81e-12
P-0024072-T01-IM6	0.0521801	0.947763	5.13e-05	0.00143322	5.03e-06	0	1.19e-08
P-0022680-T01-IM6	0.000742018	0.999233	2.53e-05	0.0014039	1.84e-08	2.07e-15	5.19e-10
P-0007978-T01-IM5	0.000282602	0.0747766	0.924743	0.00138821	0.000117418	0	7.99e-05
P-0031112-T02-IM6	0.195808	0.0210669	0.569343	0.00138151	0.19726	0	0.0165208
P-0026354-T01-IM6	0.0374757	0.00291471	0.163297	0.00135959	0.0340118	2.01e-05	0.7623
P-0020121-T01-IM6	2.64e-05	0.885154	0.114819	0.00137901	4.54e-07	0	0
P-0001977-T01-IM3	0.218647	0.00400279	0.451759	0.00137414	0.317755	0	0.0078352
P-0023138-T01-IM6	1.34e-05	0.840448	0.159537	0.00135937	0	0	1.59e-06
P-0015257-T01-IM6	1.19e-05	0.999987	6.89e-07	0.00135381	1.11e-12	3.13e-27	2.94e-13
P-0009324-T02-IM5	0.121229	0.464562	0.301087	0.00134507	0.0758701	1.17e-07	0.0372517
P-0018771-T02-IM6	0.145727	0.0111402	0.455426	0.00133347	0.269973	0	0.117733
P-0019333-T01-IM6	0.0966094	0.90334	1.99e-05	0.00130341	3.09e-05	3.59e-12	8.69e-08
P-0000893-T01-IM3	0.114591	0.00311102	0.776343	0.00128934	0.0959226	0	0.0100327
P-0004701-T01-IM5	0.0162389	0.0420649	0.92307	0.00128428	0.0138067	0	0.00481933
P-0004054-T01-IM5	0.0915729	0.000684819	0.814301	0.001259	0.090765	0	0.00267645
P-0021112-T01-IM6	0.0125066	0.0153887	0.943009	0.00124338	0.0242841	0	0.00481185
P-0036809-T01-IM6	1.74e-06	0.999998	1.74e-15	0.0012336	2.31e-18	4.6e-44	2.55e-24
P-0017208-T01-IM6	2.2e-05	0.252334	0.747642	0.0011988	0	0	1.77e-06
P-0003584-T01-IM5	0.0377532	0.00125013	0.77587	0.0011971	0.178281	0	0.00684575
P-0001199-T01-IM3	0.000255626	0.0418217	0.956919	0.00117062	0.000190803	0	0.00081273
P-0016025-T01-IM6	2.24e-05	0.995753	0.00422433	0.0011504	1.41e-08	0	2.14e-08
P-0006177-T01-IM5	3.06e-05	0.99995	1.96e-05	0.00112927	9.95e-11	2.38e-21	7.36e-10
P-0009101-T01-IM5	6.46e-05	0.874004	0.125911	0.0011125	0	0	2.03e-05
P-0017678-T01-IM6	0.000459227	0.256417	0.737405	0.00110861	0.000105067	0	0.00561377
P-0037130-T01-IM6	1.14e-05	0.999987	1.28e-06	0.00108054	8.32e-12	1.85e-19	4.38e-12
P-0002292-T01-IM3	5.61e-06	0.976612	0.0233811	0.0010706	0	0	8.92e-07
P-0023779-T01-IM6	0.0223746	0.0439732	0.920165	0.00106266	0.0134871	0	0
P-0002311-T01-IM3	4.92e-06	0.769146	0.230846	0.00099299	0	0	2.86e-06
P-0015137-T01-IM6	0.000426383	0.696369	0.303144	0.000985564	2.19e-05	0	3.88e-05
P-0010840-T02-IM5	0.036316	0.00777475	0.919812	0.000972975	0.0331753	0	0.00292174
P-0014422-T01-IM6	0.315284	0.000248206	0.31892	0.000962417	0.365326	0	0.000221759
P-0009256-T01-IM5	0.0596081	0.00041314	0.695818	0.00091679	0.23568	0	0.00848055
P-0000891-T01-IM3	8.28e-05	0.891805	0.108038	0.000907263	0	0	7.42e-05
P-0028101-T01-IM6	0.00620321	0.993786	1.03e-05	0.000899523	1.45e-07	0	3.24e-09
P-0004137-T01-IM5	4.29e-05	0.972918	0.0270388	0.000890473	7.62e-08	0	3.38e-07
P-0012049-T01-IM5	0.00617025	0.418583	0.572766	0.000795909	0.00170038	3.36e-10	0.0007803
P-0015501-T01-IM6	1.25e-05	0.284102	0.71588	0.000795685	0	0	4.65e-06
P-0027259-T02-IM6	0.0319439	0.000344372	0.929433	0.000792144	0.0366464	0	0.00163279
P-0014227-T01-IM6	0.804038	0.0273434	0.0179814	0.000763745	0.118221	0	0.0324163
P-0009915-T01-IM5	0.119092	0.00444497	0.791862	0.000741131	0.0770949	0	0.00750615
P-0009202-T01-IM5	0.0569073	0.00862825	0.789243	0.000740184	0.0852481	0	0.0599738
P-0003278-T01-IM5	0.208353	0.00118865	0.632074	0.000732789	0.133507	0	0.0248773
P-0004472-T01-IM5	0.0728483	0.00394324	0.848888	0.00072621	0.0732292	0	0.00109146
P-0014208-T01-IM6	0.0106835	0.970683	0.0183215	0.000679907	0.000312209	1.49e-07	0
P-0012883-T01-IM5	1.47e-06	0.996041	0.0039577	0.000639093	0	0	1.38e-07
P-0008442-T02-IM5	3.6e-05	0.855766	0.143966	0.000631863	0	2.98e-10	0.000232117
P-0010980-T02-IM6	0.243351	0.00461951	0.304529	0.000580072	0.440028	0	0.0074735
P-0016935-T01-IM6	0.213695	0.786303	9.17e-07	0.000565033	5.62e-07	0	6.5e-12
P-0015186-T01-IM6	1.15e-05	0.824769	0.175217	0.000528498	0	0	3.13e-06
P-0021442-T01-IM6	0.130984	0.0144595	0.476708	0.000516071	0.0943892	3.52e-06	0.283459
P-0005054-T01-IM5	2.66e-05	0.957812	0.0421591	0.000508665	0	0	2.69e-06
P-0016928-T01-IM6	0.000792076	0.999208	4.17e-08	0.000498591	2.17e-10	0	0
P-0002874-T01-IM3	0.0376984	0.000371537	0.841188	0.000488472	0.113797	0	0.00694537
P-0024795-T01-IM6	0.0333069	0.387379	0.572174	0.000487659	0.00521314	0	0.00192625
P-0014786-T01-IM6	0.00735609	0.0116502	0.97192	0.000486073	0.00718939	0	0.00188461
P-0020643-T01-IM6	0.192592	0.00255185	0.628194	0.00048591	0.17459	0	0.00207261
P-0011439-T01-IM5	1.4e-05	0.988229	0.0117567	0.000480212	0	0	2.69e-07
P-0001867-T01-IM3	0.00262511	0.0781785	0.917678	0.000477226	0.000541873	0	0.000976673
P-0029148-T01-IM6	0.19563	0.000409403	0.466293	0.000475813	0.335136	0	0.002532
P-0016918-T01-IM6	0.00202902	0.363073	0.632925	0.000421497	0.000521354	0	0.001452
P-0001578-T01-IM3	0.0353963	0.712824	0.24783	0.000420198	0.00247588	0	0.00147435
P-0004142-T01-IM5	0.000611516	0.988012	0.011344	0.000412755	1.9e-06	0	3.03e-05
P-0017253-T01-IM6	0.0378449	0.000247495	0.81234	0.000386464	0.147959	0	0.00160911
P-0002668-T01-IM3	0.000495429	0.802105	0.19732	0.000382218	0	0	7.97e-05
P-0002921-T01-IM3	0.00374191	0.0188514	0.97187	0.000373677	0.00380821	0	0.0017284
P-0008715-T01-IM5	1.06e-06	0.616379	0.38362	0.000367533	0	0	7.08e-07
P-0006663-T01-IM5	0.120666	0.00172545	0.63428	0.000358944	0.242719	0	0.000608492
P-0021532-T01-IM6	0.000250965	0.185476	0.814179	0.000343361	0	0	9.36e-05
P-0005309-T01-IM5	0.00870077	1.03e-06	0.74767	0.000334666	0.243038	0	0.000589726
P-0006542-T01-IM5	0.0104675	0.00396207	0.865552	0.000326541	0.0590831	0	0.060935
P-0020192-T01-IM6	0.0186787	0.00578659	0.943416	0.000315636	0.0252114	0	0.00690693
P-0024824-T01-IM6	1.06e-05	0	0.000148126	0.000314995	0.00112688	0	0.998714
P-0009426-T01-IM5	0.0563425	0.00117744	0.809963	0.000313914	0.1313	0	0.00121716
P-0004517-T01-IM5	0.0498935	0.00464942	0.80219	0.000274621	0.0652133	3.84e-05	0.0780537
P-0000681-T01-IM3	0.00917685	0.0179189	0.945774	0.000306689	0.0258034	0	0.00132683
P-0021833-T01-IM6	0.00883988	0.00539916	0.861327	0.00030012	0.0341326	0	0.0903016
P-0000363-T01-IM3	7.36e-06	0.956776	0.0432116	0.000297725	0	0	5.38e-06
P-0005159-T01-IM5	0.999775	3.2e-08	1.11e-07	0.000295898	0.000224847	0	2.95e-13
P-0020591-T01-IM6	0.000578252	0.448324	0.550993	0.000286881	1.19e-05	0	9.29e-05
P-0012678-T01-IM5	0.00172426	0.392309	0.605566	0.000272025	0.000162293	0	0.000238392
P-0000103-T01-IM3	0.0333514	0.0208223	0.829925	0.000267707	0.0353116	0	0.0805892
P-0010025-T01-IM5	0.00771853	0.064502	0.915827	0.000253564	0.00790856	0	0.0040435
P-0015923-T01-IM6	1.79e-06	0.936549	0.0634493	0.000249826	1.25e-10	0	1.45e-08
P-0020086-T01-IM6	0.00525426	0.027817	0.945699	0.00023948	0.0039452	0	0.0172842
P-0012056-T02-IM6	0.0295525	0.0211421	0.920058	0.000228249	0.0230946	0	0.00615284
P-0006642-T01-IM5	0.00261268	2.17e-06	0.981189	0.000224669	0.0160988	0	9.75e-05
P-0014946-T01-IM6	0.266379	0.733621	2.28e-08	0.000211579	1.2e-07	1.02e-20	2.67e-11
P-0008857-T01-IM5	8.72e-05	0.999909	3.5e-06	0.00021074	1.09e-09	2.3e-16	7.43e-10
P-0008678-T01-IM5	0.0410942	0.00246885	0.881781	0.000207046	0.0688962	0	0.00575992
P-0016149-T01-IM6	6.73e-07	0.949082	0.0509176	0.000205639	0	0	8.69e-08
P-0009752-T01-IM5	1.66e-13	1	6.37e-31	0.000182963	8.27e-41	1.71e-78	0
P-0011260-T01-IM5	0.238156	0.0243258	0.500137	0.000159492	0.21714	0	0.0202412
P-0021528-T01-IM6	2.53e-06	0.966277	0.0337145	0.000156411	0	2.66e-13	5.68e-06
P-0012192-T02-IM5	0.0144218	0.000122526	0.827512	0.000146291	0.149109	0	0.00883451
P-0012849-T01-IM5	0.0243114	0.00236323	0.793201	0.000145923	0.168722	0	0.0114027
P-0026063-T01-IM6	0.181417	0.238985	0.537534	0.000139855	0.03488	0	0.00718399
P-0003871-T01-IM5	0.000825045	0.999175	2.13e-10	0.000138563	7.7e-13	0	0
P-0012476-T02-IM6	0.002198	0.000211996	0.987172	0.000135206	0.0093939	0	0.0010245
P-0001987-T01-IM3	0.000440443	0.919455	0.0801005	0.000126666	2.44e-06	0	1.6e-06
P-0021774-T01-IM6	1.3e-05	0.999987	1.22e-11	0.00012426	2.77e-15	0	0
P-0025115-T01-IM6	7.98e-06	0.891824	0.108168	0.000123767	0	0	0
P-0026521-T01-IM6	0.0123445	2.88e-05	0.769453	0.000120924	0.218013	0	0.000159989
P-0007051-T01-IM5	2.85e-05	0.931452	0.0685109	0.000118628	0	0	8.3e-06
P-0001485-T01-IM3	0.024456	0.975538	4.54e-06	0.000116974	1.56e-06	0	5.16e-09
P-0005489-T01-IM5	2.24e-05	0.866834	0.133118	0.000111482	0	0	2.51e-05
P-0039091-T01-IM6	1.02e-05	0.99999	3.42e-12	0.000111303	4.73e-16	4.19e-39	2.65e-21
P-0009017-T01-IM5	0.000922806	0.00507132	0.992828	0.000107383	0.00115861	0	1.89e-05
P-0017506-T01-IM6	7.38e-08	1	7.37e-11	0.000104778	1.83e-17	4.24e-31	6.65e-20
P-0012194-T01-IM5	0.00170631	0.995983	0.00230325	0.000103841	1.94e-06	3.65e-14	5.09e-06
P-0028712-T01-IM6	0.024159	0.00458376	0.791355	0.000101862	0.164294	4.27e-08	0.0156092
P-0017735-T01-IM6	0.0128525	0.000539333	0.966405	9.97e-05	0.0156245	0	0.00457838
P-0002247-T01-IM3	0.0636543	0.0113005	0.81219	9.85e-05	0.105196	0	0.00765896
P-0010174-T01-IM5	0.000727595	0.0179915	0.980393	9.84e-05	0.000649914	0	0.000237593
P-0028910-T01-IM6	0.00179742	0.993183	0.0050146	9.34e-05	3.91e-06	1.82e-14	9.99e-07
P-0016175-T01-IM6	0.104011	8.88e-05	0.357665	8.81e-05	0.537345	0	0.000889795
P-0024639-T01-IM6	2.31e-05	0.999977	2.99e-17	8.18e-05	2.21e-19	4.99e-46	4.2e-27
P-0007418-T01-IM5	0.00550599	0.00313544	0.970009	8.05e-05	0.0193123	0	0.00203742
P-0006046-T01-IM5	0.0148073	0.0002503	0.911281	7.72e-05	0.072568	0	0.00109367
P-0017472-T01-IM6	1.3e-07	0.660877	0.339122	7.61e-05	0	0	2.2e-08
P-0001385-T01-IM3	0.0130989	0.00802079	0.967367	7.39e-05	0.0103697	0	0.00114405
P-0002818-T01-IM3	8.69e-07	0.951991	0.0480085	7.04e-05	0	0	8.96e-08
P-0019700-T01-IM6	0.026332	0.000432146	0.901173	7.02e-05	0.071611	0	0.00045181
P-0010115-T01-IM5	0.00497588	0.995024	2.42e-07	6.66e-05	1.02e-07	2.21e-15	1.31e-09
P-0026574-T02-IM6	0.0221426	0.000107072	0.853491	6.65e-05	0.12361	0	0.000649482
P-0015785-T01-IM6	6.14e-08	0.998828	0.00117157	6.64e-05	2.05e-12	0	4.62e-09
P-0025016-T01-IM6	0.0253134	2.38e-05	0.775082	6.58e-05	0.199165	0	0.000415034
P-0023408-T01-IM6	0.0533051	0.000495855	0.677744	6.06e-05	0.246416	0	0.0220395
P-0007810-T02-IM5	0.057137	0.94043	0.00234035	5.88e-05	9.13e-05	0	1.04e-06
P-0001710-T01-IM3	3e-07	0.974688	0.0253119	5.38e-05	0	0	2.92e-08
P-0006071-T01-IM5	0.0102163	0.0241273	0.949616	4.63e-05	0.0151112	0	0.000928877
P-0021291-T01-IM6	0.0254254	3.27e-06	0.723054	4.57e-05	0.250486	9.57e-10	0.00103176
P-0017910-T01-IM6	0.0440122	0.000681436	0.880007	4.55e-05	0.0738728	0	0.00142628
P-0009168-T01-IM5	0.00679898	0.013723	0.971881	4.22e-05	0.00697902	0	0.000618175
P-0026008-T01-IM6	4.56e-05	0.999954	3.16e-09	3.75e-05	2.22e-13	2.18e-26	4.07e-16
P-0004056-T01-IM5	2.02e-05	0.909098	0.0908798	3.72e-05	0	0	1.71e-06
P-0024395-T01-IM6	0.000170349	0.99983	4.49e-13	3.71e-05	4.04e-14	1.2e-34	1.35e-20
P-0009950-T01-IM5	4.13e-05	0.999959	1.17e-07	3.52e-05	3.7e-12	1.52e-24	3.95e-14
P-0038936-T01-IM6	0.952289	0.0477109	3.65e-08	3.45e-05	4.19e-08	0	1.66e-14
P-0016624-T01-IM6	5.7e-07	0.925332	0.0746672	3.41e-05	0	0	1.88e-07
P-0015331-T01-IM6	4.74e-08	0.963602	0.0363983	2.55e-05	0	0	4.63e-09
P-0020082-T01-IM6	0.000226965	0.99974	3.3e-05	2.41e-05	2.84e-09	0	2.82e-10
P-0007101-T02-IM5	0.00969144	0.000917383	0.939687	2.36e-05	0.0484315	0	0.00127288
P-0005848-T01-IM5	0.0120052	0.0869314	0.884853	2.35e-05	0.013195	0	0.00301554
P-0006724-T01-IM5	0.00119787	1.36e-07	0.986635	2.23e-05	0.0119865	0	0.000180935
P-0006674-T01-IM5	4.9e-07	0.694246	0.305754	2.15e-05	0	0	1.29e-07
P-0027133-T01-IM6	0.0237412	0.013915	0.937792	2.07e-05	0.0209455	0	0.00360658
P-0014470-T01-IM6	2.78e-08	0.996657	0.00334334	1.98e-05	0	0	3.53e-10
P-0007916-T01-IM5	0.00291518	3.49e-05	0.925973	1.92e-05	0.0141054	0	0.0569718
P-0021503-T01-IM6	2.94e-06	0.80463	0.195365	1.82e-05	6.86e-08	0	2.18e-06
P-0038722-T01-IM6	3.88e-05	0.999942	1.91e-05	1.78e-05	7e-10	1.25e-30	1.14e-09
P-0006510-T01-IM5	0.00361447	5.67e-05	0.938226	1.64e-05	0.0561439	0	0.00195889
P-0019939-T01-IM6	0.911577	0.0704114	0.00100189	1.54e-05	0.012336	3.69e-15	0.00467361
P-0013106-T01-IM5	9.12e-08	0.98352	0.0164801	1.49e-05	0	0	3.52e-08
P-0002969-T01-IM3	0.0531894	0.000714067	0.822704	1.33e-05	0.123225	0	0.000167837
P-0027726-T01-IM6	0.0167538	0.000120539	0.752641	1.32e-05	0.230074	0	0.000410913
P-0015512-T01-IM6	0.000143984	0.999856	7.44e-12	1.28e-05	2.54e-14	0	9.35e-17
P-0008997-T01-IM5	0.0018561	0.998126	1.74e-05	1.09e-05	6.67e-07	3.19e-25	1.48e-07
P-0023848-T01-IM6	0.0241786	0.974901	0.000903277	1.02e-05	1.11e-05	7.67e-15	5.89e-06
P-0003628-T01-IM5	3.6e-06	0	2.72e-05	5.42e-06	0.00101057	4.09e-06	0.998959
P-0009714-T01-IM5	0.0158646	0.000108798	0.839573	9.43e-06	0.140293	0	0.00416068
P-0016033-T01-IM6	0.00884842	0.000147795	0.716094	8.01e-06	0.274645	4.5e-11	0.000263998
P-0020065-T01-IM6	7.42e-10	0.963667	0.0363331	6.1e-06	0	0	2.36e-10
P-0002715-T01-IM3	2.54e-08	0.997798	0.00220149	5.89e-06	0	0	2.69e-09
P-0000222-T01-IM3	2e-08	0.953381	0.046619	5.64e-06	0	0	1.79e-08
P-0016481-T01-IM6	0.111853	0.00125973	0.43162	5.53e-06	0.455046	0	0.000221763
P-0016224-T01-IM6	0.000475375	7.54e-07	0.934496	4.97e-06	0.0647938	0	0.000234397
P-0015348-T01-IM6	0.0422035	0.00036756	0.763747	4.86e-06	0.189496	3.79e-08	0.00418539
P-0000681-T02-IM5	0.000177837	0.00154969	0.997091	4.26e-06	0.00115231	0	2.95e-05
P-0003553-T01-IM5	0.00107491	0.00367072	0.993037	3.9e-06	0.00219185	0	2.53e-05
P-0000423-T01-IM3	1.15e-09	0.995935	0.00406484	3.85e-06	0	0	2.22e-10
P-0021266-T01-IM6	1.42e-06	0.0319655	0.968033	3.7e-06	8.43e-08	0	2.65e-07
P-0011467-T01-IM5	9.69e-07	0.999999	6.54e-09	3.48e-06	1.49e-14	4.48e-19	3.64e-15
P-0020817-T01-IM6	4.65e-06	0.999995	2.48e-11	3.45e-06	3.39e-16	6.72e-42	3.29e-20
P-0011440-T01-IM5	0.0314909	2.64e-05	0.881989	3.39e-06	0.086474	0	2e-05
P-0032691-T01-IM6	6.35e-12	1	1.84e-24	3.11e-06	1.48e-32	3.18e-76	1.74e-41
P-0004442-T01-IM5	0.000850453	8.24e-07	0.778537	2.89e-06	0.220574	0	3.75e-05
P-0008353-T01-IM5	2.92e-09	0.833678	0.166322	2.44e-06	0	0	2.12e-10
P-0018673-T01-IM6	9.15e-08	0.11776	0.88224	2.21e-06	1.07e-09	0	2.83e-09
P-0023450-T01-IM6	2.15e-08	0.943653	0.0563473	2.19e-06	0	0	3.28e-09
P-0015966-T01-IM6	6.19e-10	0.996141	0.00385913	2.17e-06	0	0	3.72e-11
P-0006713-T01-IM5	4.11e-05	4.47e-12	0.965097	2.11e-06	0.0348615	0	1.42e-07
P-0019717-T01-IM6	9.36e-10	0.997676	0.00232409	1.79e-06	0	0	1.05e-09
P-0037110-T01-IM6	0.000878352	0.999122	5.45e-11	1.51e-06	7.89e-13	1.04e-33	0
P-0005366-T01-IM5	6.09e-08	1	1.7e-18	1.04e-06	1.99e-23	1.9e-52	1.6e-30
P-0014061-T02-IM6	0.044382	0.00169288	0.804555	8.23e-07	0.148726	0	0.000644227
P-0022301-T01-IM6	0.000994189	6.22e-06	0.994794	7.67e-07	0.0025016	0	0.00170412
P-0000535-T01-IM3	6.71e-09	0.986558	0.013442	6.94e-07	0	0	3.51e-09
P-0001074-T01-IM3	5.02e-10	0.998317	0.00168306	6.79e-07	0	0	3.11e-10
P-0015047-T01-IM6	0.00973273	0.000496586	0.939161	6.37e-07	0.0499824	0	0.0006275
P-0024262-T01-IM6	1.3e-08	1	1.47e-17	5.82e-07	9.87e-24	0	6.16e-29
P-0016542-T01-IM6	0.221571	2.45e-05	0.546417	5.51e-07	0.231907	0	8.08e-05
P-0011524-T01-IM5	5.57e-09	0.99631	0.00369038	4.5e-07	0	0	2.97e-10
P-0005731-T01-IM5	3.31e-10	0.999859	0.000141326	4.48e-07	0	0	8.77e-13
P-0003229-T01-IM5	0.000407613	0.264819	0.73471	4.22e-07	6.01e-05	5.02e-18	3.05e-06
P-0013826-T01-IM5	0.0231324	0.976868	9.31e-14	3.42e-07	4.81e-12	0	7.3e-19
P-0016925-T01-IM6	7.38e-10	0.99431	0.00568961	3.16e-07	0	0	4.33e-12
P-0016546-T01-IM6	6.93e-11	0.997281	0.00271874	2.51e-07	0	0	2.98e-12
P-0014818-T01-IM6	6.04e-09	0.455466	0.544534	2.16e-07	0	0	3.44e-09
P-0020422-T01-IM6	0.0139449	1.71e-06	0.716976	2.03e-07	0.268796	0	0.000281178
P-0020122-T01-IM6	1.07e-08	0.999282	0.000717569	1.83e-07	0	3.19e-22	2.46e-11
P-0009833-T01-IM5	6.58e-06	0.004063	0.995923	1.61e-07	6.04e-06	0	1.51e-06
P-0008406-T01-IM5	0.000169184	0.00060435	0.996714	1.9e-07	0.00246451	0	4.76e-05
P-0009660-T01-IM5	5.76e-05	0.0148586	0.985069	2.11e-07	1.27e-05	0	2.46e-06
P-0009764-T01-IM5	0.000496751	1.09e-06	0.983893	1.12e-07	0.011967	0	0.0036426
P-0015214-T01-IM6	0.00507956	6.31e-07	0.784685	5.55e-08	0.210221	0	1.36e-05
P-0009364-T01-IM5	1.2e-11	0.998999	0.00100083	5.93e-08	0	0	6.39e-13
P-0028473-T01-IM6	0.0381082	3.5e-06	0.187557	1.95e-08	0.774254	1.71e-09	7.72e-05
P-0010726-T01-IM5	1.62e-08	1	1.29e-11	4.97e-08	2.13e-18	4.39e-30	3.52e-21
P-0000012-T03-IM3	0.00085473	1.52e-05	0.924105	7.98e-10	0.0747925	0	0.000232271
P-0023568-T01-IM6	0.000887422	4.18e-08	0.732932	1.91e-08	0.26604	0	0.000140507
P-0026970-T01-IM6	3.93e-13	0.999209	0.000790852	1.33e-08	0	0	1.77e-14
P-0019765-T02-IM6	0.00940576	9.18e-05	0.944298	9.86e-09	0.0461176	0	8.65e-05
P-0022096-T01-IM6	2.1e-08	1	2.48e-15	6.88e-09	8.13e-23	0	5.63e-29
P-0015920-T01-IM6	1.82e-22	0.999997	2.92e-06	4.58e-16	0	0	8.4e-25
P-0013831-T01-IM5	6.39e-06	9.06e-09	0.994839	1.77e-09	0.00515358	0	6.54e-07
P-0003132-T01-IM5	1.97e-10	0.986921	0.0130785	2.91e-09	0	0	3.53e-12
P-0018197-T01-IM6	5.24e-09	1.71e-06	0.999998	7.29e-15	9.11e-08	0	3.4e-10
P-0006895-T01-IM5	5.67e-05	1.23e-05	0.998968	3.82e-10	0.000960328	0	3.11e-06
P-0012817-T01-IM5	0.000239822	7.12e-08	0.977701	2.98e-12	0.0220586	0	4.59e-07
P-0025945-T01-IM6	8.29e-11	1	5.59e-17	4.66e-10	1.67e-27	0	5.44e-31
P-0024866-T01-IM6	2.82e-32	1	5.37e-09	5.59e-23	0	0	2.77e-35
P-0019263-T01-IM6	1.95e-17	1	3.04e-22	2.33e-10	9.41e-40	1.23e-77	1.08e-42
P-0003869-T01-IM5	9e-17	0.95998	0.0400202	5.57e-13	7.47e-22	0	9.48e-20
P-0010921-T01-IM5	1.72e-22	0.999999	7.87e-07	1.33e-13	0	0	2.29e-24
P-0002758-T01-IM3	0.00103395	7.53e-07	0.95342	9.89e-10	0.0455417	0	3.57e-06
P-0001171-T01-IM3	8.37e-11	6.26e-09	1	2.07e-20	9.32e-09	0	2.6e-14
P-0005783-T02-IM6	5.49e-10	2.67e-16	0.997735	1.4e-31	0.00226532	0	4.78e-15
P-0003562-T02-IM5	0.000471408	1.45e-07	0.950653	7.68e-11	0.0488746	0	8.58e-07
P-0010715-T01-IM5	3.61e-06	4.69e-11	0.995241	2.52e-12	0.00475525	0	2.31e-07
P-0003562-T01-IM5	0.00022139	1.23e-07	0.968664	2.73e-11	0.0311138	0	8.62e-07
P-0003719-T01-IM5	4.71e-27	0.999999	1.29e-06	3.11e-18	0	0	6.82e-28
P-0005783-T01-IM5	3.41e-06	3.49e-11	0.961087	3.23e-19	0.0389098	0	5.6e-09
P-0024544-T01-IM6	3.92e-17	0.999997	2.92e-06	7.07e-12	0	0	2.45e-19
P-0001836-T01-IM3	0.00218468	0.00017283	0.981014	1.32e-08	0.0165666	0	6.15e-05
P-0019390-T01-IM6	6.01e-05	1.71e-09	0.952004	4.67e-12	0.0479358	0	7.75e-08
P-0009293-T01-IM5	0.000176591	2.41e-05	0.997468	2.89e-09	0.00230552	0	2.62e-05
P-0004189-T01-IM5	7.85e-05	0.0343403	0.965574	5.31e-10	7.47e-06	0	2.18e-08
P-0015649-T01-IM6	1.66e-26	0.999989	1.05e-05	1.06e-15	0	0	5.24e-28
P-0019262-T02-IM6	2.59e-05	1.31e-06	0.999214	1.51e-11	0.00075917	0	6.57e-08
P-0012373-T01-IM5	7.41e-05	1.22e-05	0.946318	1.48e-09	0.0516517	0	0.0019435

## Sheet: Table S3
Table S3 Overall survival prognostic analysis results of all gene mutations and their P values in male and female patients
Gene	Total P value	Male P value	Female P value
TERT	2.87e-39	4.2e-22	3.01e-17
BRAF	2.32e-21	8.6e-13	8.84e-10
PTPRT	5.26e-20	3.9e-13	3.94e-08
TP53	4.38e-16	7.96e-12	1.26e-05
PAK7	6.6e-15	9.39e-09	1.92e-07
GRIN2A	1.99e-14	1.44e-11	0.000674485
ROS1	2.39e-14	1.12e-08	1.12e-06
KEAP1	2.69e-14	1.8e-08	8.15e-07
TP63	1.65e-12	4.5e-09	0.000164521
KRAS	1.87e-12	0.00035813	2.83e-08
PTPRD	2.26e-12	3.05e-09	0.000252721
PREX2	2.54e-12	1.52e-08	5.27e-05
STK11	4.2e-12	1.92e-06	2.35e-06
EPHA7	4.64e-12	5.41e-09	0.000350726
NRAS	7.07e-11	5.91e-06	3.26e-06
PIK3C2G	2.24e-10	1.97e-09	0.0348029
NTRK3	2.62e-10	1.93e-08	0.00522682
NOTCH3	3.29e-10	1.06e-07	0.00128277
KDR	7.21e-10	2.16e-06	8e-05
CARD11	2.66e-09	3.21e-07	0.00259152
IKZF1	7.15e-09	0.000266459	1.71e-05
NOTCH4	1.21e-08	8.25e-06	0.000725943
TET2	2.23e-08	7.33e-06	0.00105386
FGFR2	2.9e-08	3.93e-05	0.00026048
ERBB4	3.82e-08	9e-06	0.00139285
FLT4	8.59e-08	6.26e-05	0.000523746
KMT2B	1.21e-07	9.72e-06	0.00428275
FLT3	1.22e-07	0.000115044	0.000362157
ALK	1.23e-07	0.000115039	0.000243754
KMT2A	1.57e-07	1.73e-05	0.00321341
ZFHX3	2.44e-07	0.000298364	0.000263692
IL7R	5.72e-07	9.78e-06	0.0159777
KMT2C	1.02e-06	0.000820876	0.000360468
CDKN2A	2e-06	0.00932483	3.13e-05
EPHA3	2.7e-06	4.07e-05	0.0154902
TEK	2.98e-06	0.000178383	0.00636489
MET	3.52e-06	0.000735538	0.00158326
POLE	3.85e-06	0.00328501	0.000363162
SPEN	4.11e-06	0.000218548	0.00840846
ARID2	4.81e-06	0.000308636	0.00460923
AXL	6.47e-06	0.000100586	0.0313521
FLT1	7.82e-06	0.000703677	0.00465201
NF1	8.55e-06	9.67e-05	0.0463156
MAP2K1	9.33e-06	2.55e-05	0.198477
NCOA3	9.58e-06	8.93e-05	0.0612278
MGA	1.08e-05	0.000611753	0.00606071
KMT2D	1.22e-05	0.00380632	0.00104218
PRDM1	1.28e-05	0.000414355	0.0112401
FAT1	1.33e-05	0.000641556	0.00691074
PDGFRB	1.37e-05	5.13e-05	0.0987261
SETD2	1.5e-05	9.51e-06	0.515435
CSF1R	1.62e-05	0.000221718	0.0412676
RET	1.9e-05	0.00384018	0.00141711
MTOR	2.02e-05	0.00155701	0.00509257
PIK3CG	2.09e-05	6.58e-05	0.0935848
CREBBP	2.4e-05	0.00031607	0.0393517
ASXL1	2.91e-05	0.0021856	0.00515987
PPARG	3.17e-05	0.000412313	0.0394788
PTCH1	3.35e-05	0.000144338	0.114395
VHL	3.68e-05	0.00058974	0.0442534
PPP6C	3.8e-05	0.00254725	0.0102624
DNMT1	3.92e-05	0.00289776	0.00686852
ATR	5.68e-05	0.00475031	0.0054367
SLX4	5.98e-05	0.00148598	0.0264932
CBL	6.03e-05	0.000106665	0.237693
TSHR	6.49e-05	0.00103362	0.0320655
TET1	7.83e-05	0.00173638	0.0298365
MAP3K13	9.39e-05	0.000292289	0.137432
CIC	0.000101032	0.00309371	0.0138031
FGFR4	0.000120101	0.000153422	0.277395
MST1R	0.00012563	0.00171837	0.0241441
SYK	0.000132904	0.00351481	0.021929
ANKRD11	0.000138034	0.0030886	0.0191639
PTPRS	0.00016493	0.00055063	0.064424
STK19	0.000169009	0.000924355	0.0903841
BRD4	0.000197369	0.00837049	0.00906173
ARID1A	0.00021195	0.0462923	0.000835375
HGF	0.000229147	0.000664323	0.110824
PDGFRA	0.000253189	0.0525464	0.00101254
TIMM8B	0.000253416	NA	0.000578403
INSR	0.000262226	0.0123064	0.00702066
RNF43	0.000289523	0.00117947	0.100601
FAM46C	0.000302211	0.00157344	0.157857
RICTOR	0.000317409	0.00106043	0.102928
ARID1B	0.000333961	0.00676768	0.0171033
RPTOR	0.000345696	0.0135041	0.0101468
BRCA2	0.000377258	0.00458736	0.0488866
MDC1	0.000393446	0.0240915	0.0044101
CRLF2	0.000404825	0.00492894	0.0535033
MED12	0.000422646	0.00114599	0.0423431
ERG	0.000471498	0.000628862	0.331992
NTRK1	0.000472263	0.00119178	0.226071
INHBA	0.000512529	0.00341516	0.0771097
BRIP1	0.000599225	0.000484281	0.388038
EZH2	0.000640422	0.00103952	0.278837
NOTCH2	0.000676956	0.0144099	0.0258567
PGR	0.000682954	0.0111068	0.0290499
PPM1D	0.000698314	0.0141123	0.0217101
PLCG2	0.00084224	0.0151947	0.0263086
BIRC3	0.000847325	0.00205067	0.228066
RAD50	0.000862289	0.00210572	0.221955
NSD1	0.000881677	0.00297573	0.1785
RAC1	0.00100464	0.00588546	0.100125
NCOR1	0.00106606	0.0246716	0.0186854
KNSTRN	0.00107722	0.00462812	0.987947
MPL	0.00113433	0.00592777	0.0790573
HNF1A	0.00114855	0.0090295	0.0523226
BLM	0.00116654	0.0403568	0.0107286
DICER1	0.00137823	0.0126824	0.0458232
JAK2	0.00138381	0.00226486	0.285749
BCOR	0.00151798	0.00171855	0.200263
JAK3	0.0017087	0.0879643	0.00575013
EPHB1	0.0019582	0.00374157	0.408902
ATRX	0.00218339	0.237926	0.000597368
AR	0.00261074	0.0172032	0.0414177
SRC	0.00281105	0.00400942	0.397725
TP53BP1	0.00294386	0.0202939	0.0555861
LYN	0.00298261	0.0132517	0.106483
IDH1	0.0030117	0.000924151	0.720472
ETV1	0.00315955	0.0246872	0.052925
LATS2	0.00317951	0.0389743	0.0314634
PRDM14	0.00330389	0.127433	0.0131684
IKBKE	0.00332825	0.00606153	0.256696
SOS1	0.00358607	0.142579	0.0120757
PARK2	0.00376668	0.00739069	0.287237
PHOX2B	0.00495659	0.0947103	0.0202239
GLI1	0.00542347	0.016422	0.210503
CDK12	0.00554258	0.0352092	0.09006
ALOX12B	0.00554673	0.0986365	0.0244361
POLD1	0.0056044	0.00924871	0.343414
GSK3B	0.00584714	0.00922725	0.376077
PTPN11	0.00594333	0.0959176	0.0291855
APC	0.0061753	0.018348	0.16635
ABL1	0.00626966	0.00378531	0.68368
ATM	0.00648165	0.0085284	0.296827
STAT5B	0.0065548	0.0208023	0.204605
INPPL1	0.00659356	0.0412791	0.0830649
BTK	0.0067417	0.00305628	0.458092
ASXL2	0.00682258	0.0232256	0.187697
ARID5B	0.00722296	0.0447421	0.0759792
EPAS1	0.0073707	0.0536673	0.985549
LATS1	0.00778314	0.0134946	0.452211
ERCC2	0.00790459	0.0393352	0.132535
CYLD	0.00790618	0.0284508	0.160865
FOXO1	0.00809658	0.025756	0.184118
PRKAR1A	0.00827482	0.0560497	0.0688981
HLA-B	0.00840187	0.986691	0.607501
TBX3	0.00860854	0.0135672	0.425698
IGF1R	0.0088209	0.0601775	0.0749266
NOTCH1	0.00889071	0.00168451	0.708431
FGFR1	0.00909467	0.100835	0.0446618
GATA3	0.00952069	0.0150235	0.458051
AMER1	0.00961791	0.134423	0.0201867
CCNE1	0.00966404	0.0588116	0.989151
STAG2	0.00971422	0.336756	0.00575175
TSC1	0.00977367	0.0858839	0.0538104
FAM58A	0.0100368	0.0241793	0.237116
MST1	0.0101849	0.0186253	0.368056
DOT1L	0.0106872	0.251347	0.00865742
RAD51B	0.01098	0.208439	0.035555
FANCA	0.0111271	0.015407	0.423683
MYCN	0.0113297	0.0324144	0.268989
AXIN1	0.0114006	0.0921245	0.0641499
AURKA	0.0114226	0.042453	0.135922
NTRK2	0.0118645	0.118885	0.0364402
CDKN2Ap14ARF	0.0125164	0.0185129	0.262276
CTCF	0.012652	0.0228659	0.400446
PPP2R1A	0.0131574	0.0825784	0.074614
KDM5C	0.0132389	0.0596981	0.128396
RTEL1	0.0135951	0.064893	0.119425
DNMT3A	0.0138698	0.0221424	0.254972
INPP4A	0.0138704	0.047652	0.154162
ACVR1	0.0143747	0.0315407	0.264001
DIS3	0.0144526	0.0856501	0.0805066
DROSHA	0.0146767	0.0610981	0.13669
MAP3K1	0.0148864	0.112462	0.0444561
SF3B1	0.0150768	0.0978903	0.0698223
TMPRSS2	0.016069	0.0313924	0.312368
MAP2K4	0.0167091	0.103052	0.0940412
MRE11A	0.0169594	0.0230598	0.47888
ERBB3	0.0169722	0.0984271	0.115608
TAP2	0.0170058	0.0382745	0.244491
CSF3R	0.0174222	0.142591	0.0513235
CCND2	0.0175992	0.0181063	0.642452
ERRFI1	0.0186759	0.0599373	0.164713
RIT1	0.0188471	0.0414536	0.256496
SESN2	0.0189692	0.981393	0.755047
SDHA	0.0192591	0.0448504	0.290131
PBRM1	0.0194243	0.0301086	0.446208
AXIN2	0.0196612	0.0619699	0.150222
NKX3-1	0.0204979	0.124491	0.0750353
SUFU	0.0205587	0.0430255	0.334237
RPS6KA4	0.02064	0.0302366	0.460626
KDM5A	0.0223112	0.192896	0.0532479
CARM1	0.0226169	0.428262	0.988809
PRKCI	0.0227893	0.104656	0.987482
RPS6KB2	0.0229328	0.0350337	0.36535
WT1	0.023123	0.0207007	0.640097
SMO	0.0232053	0.218727	0.0412012
PIK3CB	0.0235409	0.291454	0.0288956
RBM10	0.0238505	0.0125039	0.572521
UPF1	0.0246628	0.0462287	0.33035
EP300	0.0261705	0.0235308	0.68895
ERCC4	0.027376	0.0157591	0.573466
EZH1	0.0278644	0.0500737	0.434025
INHA	0.0281591	0.232997	0.056443
RFWD2	0.0282262	0.0635393	0.223165
ICOSLG	0.0290498	0.0412046	0.510853
MALT1	0.0294302	0.00936896	0.185382
KDM6A	0.0304742	0.0512276	0.323799
CDK6	0.0311633	0.196521	0.987041
NUF2	0.0315431	0.0582247	0.293119
RAF1	0.0322052	0.038668	0.544859
EPCAM	0.0325661	0.0538406	0.487045
IFNGR1	0.0330597	0.0688317	0.313039
TCF3	0.0348741	0.101625	0.210106
PIK3R2	0.0351005	0.121931	0.159878
PALB2	0.03516	0.076911	0.290991
MDM2	0.0352424	0.154355	0.98849
PARP1	0.0356987	0.178168	0.094047
CXCR4	0.0361403	0.204594	0.0978707
STAT3	0.0365243	0.248391	0.0684259
PAK1	0.0366568	0.0398103	0.521106
ERCC5	0.0366717	0.0823555	0.241396
MLL	0.0367974	0.0863041	0.240901
DDR2	0.0384177	0.05435	0.439757
ETV6	0.0391234	0.156949	0.122552
MYCL	0.0394442	0.0827465	0.987673
TRAF7	0.039556	0.0223242	0.68902
KLF4	0.0422133	0.0572984	0.481663
CYSLTR2	0.0426329	0.111552	0.206651
MSH3	0.043806	0.227063	0.0963217
BBC3	0.044135	0.0609299	0.705306
MITF	0.0474579	0.0395431	0.624299
BABAM1	0.0475141	0.985595	0.421236
NBN	0.0475788	0.136486	0.204725
CD79B	0.0494921	0.101896	0.317387
TRAF2	0.0504862	0.117213	0.193323
RAD54L	0.0505875	0.0248655	0.516044
BCL6	0.0509562	0.0279473	0.778535
EIF1AX	0.0520797	0.144229	0.235169
DCUN1D1	0.0541004	0.987959	0.195317
CDKN2B	0.0544194	0.1755	0.000578403
FLCN	0.0548156	0.0645904	0.559711
GATA2	0.0590006	0.246894	0.13796
CDK4	0.0593933	0.104346	0.361451
MSI1	0.0601007	0.237864	0.988766
WHSC1L1	0.0613162	0.129212	0.297628
TGFBR2	0.0618903	0.370861	0.0628931
XIAP	0.0619147	0.139497	0.243199
DUSP4	0.062197	0.0686156	0.73757
CDH1	0.0629609	0.0288458	0.667185
TCF7L2	0.0629856	0.0796727	0.462898
CDC42	0.0635459	0.0418691	NA
MSI2	0.0647208	0.0961229	0.48888
PIK3C3	0.0652685	0.16272	0.188164
HRAS	0.0665395	0.242942	0.177876
AURKB	0.0682635	0.261542	0.145899
SHOC2	0.0687805	0.113965	0.476813
RAD51C	0.0690857	0.0494033	0.774772
PAX5	0.0707737	0.87713	0.0155695
AKT3	0.0722259	0.0773898	0.455332
JAK1	0.0727198	0.315319	0.110297
MEF2B	0.073022	0.134242	0.35325
PIM1	0.0738485	0.447381	0.0896428
AKT1	0.074733	0.104394	0.384386
B2M	0.0749816	0.0797413	0.493041
AGO2	0.0757046	0.164341	0.298956
MLL3	0.0764561	0.354783	0.0945889
LMO1	0.0773723	0.168073	0.986338
MUTYH	0.0780333	0.443318	0.0720817
VEGFA	0.0790456	0.264776	0.989737
FOXL2	0.0824146	0.157674	0.98859
ERCC3	0.0838045	0.0335406	0.833924
TNFRSF14	0.0854989	0.410247	0.0950932
YES1	0.0858235	0.142863	0.398658
RAB35	0.0898539	0.987216	0.596646
CALR	0.0908645	0.142294	0.403629
FGF19	0.0926703	0.119886	0.607366
SPRED1	0.0928556	0.154816	0.415536
RP11-211G3.3	0.0954258	NA	0.131939
PNRC1	0.0978684	0.130789	0.572773
HOXB13	0.0981592	0.663871	0.0668098
SPOP	0.0982706	0.238251	0.256918
PTEN	0.0995286	0.494077	0.0946402
XPO1	0.101437	0.855425	0.019639
INPP4B	0.102182	0.199254	0.271135
NUP93	0.103648	0.188913	0.273473
IDH2	0.105626	0.154091	0.466176
PRKD1	0.106238	0.552583	0.0814922
SMAD2	0.108516	0.342729	0.180574
IGF1	0.108952	0.19182	0.289789
KIT	0.110392	0.890821	0.0128571
SMYD3	0.110465	0.0654991	0.743761
RECQL4	0.110917	0.778332	0.0315077
MEN1	0.111083	0.661714	0.0653019
PIK3CA	0.111524	0.678446	0.0185665
RXRA	0.115753	0.163586	0.542569
BCL2L11	0.11578	0.329298	0.199688
EPHA5	0.115984	0.0211541	0.619333
BMPR1A	0.116145	0.478813	0.13604
SH2B3	0.119598	0.0666903	0.823246
TSC2	0.119679	0.453178	0.119768
WHSC1	0.121633	0.207863	0.401474
FGF3	0.124694	0.155133	0.489969
HIST1H3G	0.127913	0.209877	0.446318
MAPK3	0.130648	0.20413	0.489351
PMS1	0.131732	0.0942176	0.970094
NEGR1	0.134381	0.0855198	0.895442
SUZ12	0.135379	0.252848	0.379307
U2AF1	0.137425	0.59437	0.119336
FGF4	0.138315	0.164125	0.590092
BARD1	0.140649	0.600607	0.11596
GTF2I	0.140697	0.115135	NA
CD276	0.141016	0.0801525	0.932965
PMS2	0.143415	0.176455	0.496505
CENPA	0.143794	0.986899	0.313503
MSH2	0.147464	0.0483281	0.635827
EED	0.147764	0.149604	0.978015
IRS2	0.152027	0.571089	0.106341
NF2	0.152917	0.256177	0.430787
FGFR3	0.153548	0.274139	0.469327
SDHD	0.153807	0.982819	0.840155
CDKN1B	0.155058	0.096391	0.6528
CSDE1	0.155292	0.175885	0.518087
CD274	0.160619	0.175201	0.608761
HIST1H2BD	0.161024	0.98725	0.687912
RHEB	0.161365	0.525063	0.00925629
CHEK1	0.163032	0.510678	0.194834
SOX9	0.163435	0.106923	0.845385
MCL1	0.168346	0.259395	0.371903
FANCC	0.171812	0.225585	0.509255
INSRR	0.172386	0.196635	0.989719
FBXW7	0.172751	0.492269	0.186261
RUNX1	0.174627	0.39807	0.279464
STK40	0.174776	0.152433	0.790876
REL	0.179543	0.352758	0.37363
PPP4R2	0.179862	0.134667	0.498099
VTCN1	0.180093	0.0543599	0.335037
ZRSR2	0.180119	0.168353	0.800164
TOP1	0.180221	0.223787	0.561109
IGF2	0.181906	0.288378	0.369122
NKX2-1	0.183049	0.0876065	0.881841
NTHL1	0.185616	0.986225	0.482775
RYBP	0.186175	0.837102	0.988136
SDHAF2	0.186995	0.423137	0.987325
GNA11	0.190891	0.332901	0.38262
RECQL	0.197125	0.108236	0.635682
TAP1	0.197367	0.182532	0.945283
MYCL1	0.199503	0.554812	0.986431
RAD51	0.199551	0.110983	0.428433
CTNNB1	0.211231	0.103405	0.983343
PIK3R3	0.215125	0.521048	0.248929
GREM1	0.215387	0.38663	0.369598
FAM175A	0.215837	0.435073	0.285494
FOXA1	0.217202	0.988507	0.0916569
RRAS2	0.218169	0.449014	0.310641
FUBP1	0.223027	0.794943	0.0891414
SMARCD1	0.22316	0.201684	0.839783
GPS2	0.229071	0.0702645	0.10481
SETD8	0.230986	0.418462	0.990148
FYN	0.232455	0.401391	0.384073
BRCA1	0.236658	0.472673	0.390897
AKT2	0.239013	0.183041	0.919352
MSH6	0.245978	0.788071	0.138263
DNMT3B	0.247269	0.118057	0.893966
H3F3C	0.248464	0.280653	0.82376
MLH1	0.251174	0.586869	0.258866
XRCC2	0.25186	0.394765	0.445104
IL10	0.26411	0.729255	0.206423
CCND3	0.268666	0.138	0.991105
MAX	0.273375	0.513368	0.318238
FOXP1	0.277746	0.103934	0.383283
SESN3	0.28988	0.328703	0.987596
MLL2	0.293593	0.639458	0.271334
IRS1	0.293668	0.284714	0.830952
BCL2	0.293741	0.408281	0.541645
SDHC	0.296215	0.659985	0.98786
CHEK2	0.302118	0.507655	0.422227
ERF	0.307573	0.215283	0.953577
SMARCA4	0.316807	0.0835832	0.570614
HIST1H3D	0.317203	0.323757	0.691704
CASP8	0.323991	0.403409	0.768612
PIK3R1	0.324375	0.443478	0.526682
EIF4E	0.337808	0.440726	0.587114
SOX17	0.3462	0.402425	0.761836
CBFB	0.34831	0.79204	0.0753137
CDK8	0.349852	0.884517	0.98798
CDC73	0.359106	0.540845	0.55431
ESR1	0.362348	0.297358	0.902739
CRKL	0.365641	0.218515	0.131939
HIST3H3	0.365775	0.233907	0.888546
STAT5A	0.371357	0.7982	0.272765
TGFBR1	0.374115	0.302255	0.676473
MDM4	0.374811	0.929149	0.226266
GNAS	0.377945	0.119609	0.38838
GATA1	0.383416	0.186265	0.988647
PDCD1	0.387669	0.34348	0.926991
GNAQ	0.389571	0.711498	0.348049
EGFL7	0.391041	0.281981	0.334982
MYD88	0.402848	0.420814	0.717962
SESN1	0.41055	0.561405	0.989749
CDKN2C	0.415319	0.191853	0.522308
NFE2L2	0.419074	0.858945	0.0596349
RAD21	0.428363	0.943195	0.266781
NPM1	0.4349	0.986877	0.615777
MAPK1	0.440731	0.362751	0.00771376
CD79A	0.440765	0.411105	0.740218
IRF4	0.44187	0.233467	0.740784
JUN	0.448983	0.244728	0.658176
MAPKAP1	0.455063	0.892764	0.987961
RAD52	0.463455	0.622518	0.640369
CDKN1A	0.474649	0.895126	0.191193
E2F3	0.477617	0.39712	0.820955
BAP1	0.501172	0.310184	0.947756
NFKBIA	0.50375	0.237061	0.327563
BCL10	0.503822	0.544703	0.915081
CCND1	0.505727	0.271515	0.449219
PDCD1LG2	0.507801	0.629159	0.66252
SOCS1	0.511816	0.329022	0.338314
RAD51D	0.525226	0.354884	0.795987
YAP1	0.532638	0.822539	0.990957
ELF3	0.534249	0.974081	0.302828
CUL3	0.549018	0.779026	0.615457
CTLA4	0.55401	0.855817	0.256227
MYC	0.556618	0.598879	0.771624
SH2D1A	0.565763	0.356502	0.974555
PIK3CD	0.573436	0.83468	0.524414
HIST1H3H	0.590778	0.929819	0.286766
MLL4	0.592925	0.636182	0.988735
ERBB2	0.593701	0.915761	0.293957
HIST1H3E	0.593983	0.980923	0.409188
TNFAIP3	0.596	0.848564	0.498339
MAP2K2	0.602111	0.987673	0.422998
HIST1H3B	0.605328	0.422174	0.0583412
RHOA	0.64691	0.506896	0.852556
H3F3A	0.64967	0.39648	0.78435
RARA	0.655147	0.269559	0.625059
SRSF2	0.65853	0.711432	0.839771
HLA-A	0.664049	0.60995	0.996717
HIST1H3A	0.682481	0.419816	0.073306
EIF4A2	0.68531	0.600662	0.809477
SHQ1	0.69102	0.159415	0.198798
TMEM127	0.696086	0.650872	0.990569
FH	0.706134	0.593499	0.859822
PLK2	0.708332	0.405481	0.28926
CDKN2Ap16INK4A	0.709691	0.839745	0.297709
RRAGC	0.710864	0.984811	0.510454
WWTR1	0.727037	0.877773	0.672156
RB1	0.729734	0.312898	0.500073
HIST1H3I	0.732515	0.975739	0.416262
HIST1H3F	0.73699	0.924343	0.501052
ARAF	0.745001	0.652679	0.775616
PDPK1	0.752449	0.98452	0.155836
SMAD4	0.767803	0.709892	0.437157
HIST1H3J	0.76878	0.540903	0.62684
RAC2	0.780586	0.924949	0.619692
PMAIP1	0.784626	0.788401	0.948882
RRAS	0.78905	0.724036	0.989385
DNAJB1	0.807665	0.794288	0.475555
SOX2	0.818602	0.383981	0.299307
MYOD1	0.84459	0.328119	0.458127
DAXX	0.85261	0.739383	0.982889
SMARCB1	0.867271	0.137064	0.239279
RASA1	0.893133	0.377469	0.187561
SDHB	0.895655	0.554994	0.747129
SMAD3	0.904888	0.729983	0.273819
HIST1H3C	0.91147	0.040541	0.164785
EGFR	0.913599	0.666452	0.622126
HIST1H1C	0.939184	0.334776	0.257068
BCL2L1	0.979128	0.985459	0.990023
RTEL1-TNFRSF6B	0.980768	0.987793	NA
TCEB1	0.982145	0.982621	NA
ID3	0.982621	0.983135	NA
PTP4A1	0.985043	0.985147	NA
FIP1L1	0.986058	0.986379	NA
H3F3B	0.986426	0.939681	0.957302
CEBPA	0.990391	0.430188	0.245527

## Sheet: Table S4
Table S4 Genes pairs of co-occurrence or mutual exclusion based on determined 68 prognostic genes across all cancer patients
Gene 1	Gene 2	P value	Odds Ratio	P value adjusted	Event	Pair	Event ratio
NF1	PTPRD	8.3e-48	7.51514	5.48e-46	Co_Occurrence	NF1, PTPRD	145/374
GRIN2A	PTPRT	4.73e-47	7.32988	3.03e-45	Co_Occurrence	GRIN2A, PTPRT	147/389
PTPRD	PTPRT	6.23e-46	6.84283	3.9e-44	Co_Occurrence	PTPRD, PTPRT	152/402
ERBB4	PTPRT	9.29e-46	8.01261	5.65e-44	Co_Occurrence	ERBB4, PTPRT	132/372
PTPRT	ROS1	1.18e-45	7.6902	7e-44	Co_Occurrence	PTPRT, ROS1	136/378
KEAP1	STK11	7.12e-45	19.1256	4.12e-43	Co_Occurrence	KEAP1, STK11	68/172
NF1	PTPRT	3.37e-43	6.20888	1.9e-41	Co_Occurrence	NF1, PTPRT	155/420
PAK7	PTPRT	2.03e-42	7.66055	1.12e-40	Co_Occurrence	PAK7, PTPRT	125/375
NF1	GRIN2A	2.2e-42	6.97792	1.18e-40	Co_Occurrence	GRIN2A, NF1	133/375
ROS1	GRIN2A	5.34e-41	7.79194	2.81e-39	Co_Occurrence	GRIN2A, ROS1	114/333
PIK3C2G	PTPRT	3.48e-39	7.84047	1.79e-37	Co_Occurrence	PIK3C2G, PTPRT	112/370
EPHA7	PTPRT	6.4e-38	8.14284	3.21e-36	Co_Occurrence	EPHA7, PTPRT	105/366
PIK3C2G	GRIN2A	1.09e-37	8.36708	5.35e-36	Co_Occurrence	GRIN2A, PIK3C2G	97/311
PTPRT	TP63	7.41e-37	7.6817	3.57e-35	Co_Occurrence	PTPRT, TP63	106/371
CARD11	PTPRT	9.77e-37	8.82977	4.61e-35	Co_Occurrence	CARD11, PTPRT	96/360
GRIN2A	PAK7	2.14e-36	7.38036	9.88e-35	Co_Occurrence	GRIN2A, PAK7	103/330
PREX2	PTPRT	1.66e-35	7.64024	7.51e-34	Co_Occurrence	PREX2, PTPRT	102/371
NF1	ROS1	3.6e-35	6.29572	1.6e-33	Co_Occurrence	NF1, ROS1	116/376
PAK7	PTPRD	1.11e-34	6.81328	4.82e-33	Co_Occurrence	PAK7, PTPRD	105/349
PAK7	ROS1	1.2e-34	7.47612	5.15e-33	Co_Occurrence	PAK7, ROS1	95/313
PTPRD	GRIN2A	3.14e-34	5.95585	1.32e-32	Co_Occurrence	GRIN2A, PTPRD	118/381
TP63	NF1	5.37e-34	7.38032	2.22e-32	Co_Occurrence	NF1, TP63	97/347
PAK7	NF1	7.8e-34	6.45916	3.16e-32	Co_Occurrence	NF1, PAK7	108/367
GRIN2A	TP63	6.5e-33	7.601	2.59e-31	Co_Occurrence	GRIN2A, TP63	89/316
ALK	NF1	3.99e-32	7.06663	1.56e-30	Co_Occurrence	ALK, NF1	94/350
ROS1	KDR	7.61e-32	7.99535	2.93e-30	Co_Occurrence	KDR, ROS1	81/291
ALK	PTPRT	1.22e-31	6.69031	4.64e-30	Co_Occurrence	ALK, PTPRT	99/382
PTPRT	NOTCH4	1.65e-31	6.07903	6.15e-30	Co_Occurrence	NOTCH4, PTPRT	107/394
EPHA7	NF1	2.33e-31	7.00891	8.54e-30	Co_Occurrence	EPHA7, NF1	92/350
GRIN2A	EPHA7	6.53e-31	7.33501	2.36e-29	Co_Occurrence	EPHA7, GRIN2A	85/317
KDR	PTPRT	2.13e-30	6.56745	7.58e-29	Co_Occurrence	KDR, PTPRT	96/383
PIK3C2G	PTPRD	2.97e-30	6.56574	1.04e-28	Co_Occurrence	PIK3C2G, PTPRD	92/344
PIK3C2G	NF1	7.53e-30	6.30247	2.6e-28	Co_Occurrence	NF1, PIK3C2G	95/362
GRIN2A	ERBB4	2.01e-29	5.93983	6.84e-28	Co_Occurrence	ERBB4, GRIN2A	97/353
TET2	NF1	2.18e-29	7.50716	7.3e-28	Co_Occurrence	NF1, TET2	81/341
KMT2B	PREX2	2.48e-29	10.6651	8.19e-28	Co_Occurrence	KMT2B, PREX2	58/216
GRIN2A	CARD11	3.94e-29	7.61647	1.28e-27	Co_Occurrence	CARD11, GRIN2A	77/309
PIK3C2G	ROS1	4.29e-29	6.91368	1.38e-27	Co_Occurrence	PIK3C2G, ROS1	82/308
EPHA7	PIK3C2G	1.02e-28	8.17895	3.24e-27	Co_Occurrence	EPHA7, PIK3C2G	69/260
PTPRD	ROS1	1.68e-28	5.43333	5.24e-27	Co_Occurrence	PTPRD, ROS1	103/378
EPHA7	PTPRD	3.2e-28	6.54018	9.86e-27	Co_Occurrence	EPHA7, PTPRD	85/340
ERBB4	ROS1	7.79e-28	5.99724	2.37e-26	Co_Occurrence	ERBB4, ROS1	89/336
TP63	ERBB4	8.08e-28	7.04671	2.43e-26	Co_Occurrence	ERBB4, TP63	76/295
EPHA3	PIK3C2G	1.2e-27	7.86511	3.57e-26	Co_Occurrence	EPHA3, PIK3C2G	68/263
PIK3C2G	PAK7	1.91e-27	6.89554	5.59e-26	Co_Occurrence	PAK7, PIK3C2G	76/295
PTPRD	ALK	2.08e-27	6.28635	6e-26	Co_Occurrence	ALK, PTPRD	85/344
IL7R	PTPRT	2.28e-27	8.31179	6.5e-26	Co_Occurrence	IL7R, PTPRT	72/366
EPHA7	ROS1	2.75e-27	6.89918	7.75e-26	Co_Occurrence	EPHA7, ROS1	76/302
PTPRT	FLT1	4.62e-27	6.47304	1.29e-25	Co_Occurrence	FLT1, PTPRT	85/382
PAK7	EPHA7	4.73e-27	7.18327	1.3e-25	Co_Occurrence	EPHA7, PAK7	72/285
PREX2	ROS1	1.25e-26	6.77007	3.39e-25	Co_Occurrence	PREX2, ROS1	75/303
GRIN2A	NOTCH4	1.82e-26	5.80512	4.88e-25	Co_Occurrence	GRIN2A, NOTCH4	87/345
ERBB4	NF1	2e-26	5.10786	5.32e-25	Co_Occurrence	ERBB4, NF1	101/392
NOTCH4	NF1	2.54e-26	5.44009	6.67e-25	Co_Occurrence	NF1, NOTCH4	94/378
NTRK3	PTPRD	3.51e-26	6.9597	9.11e-25	Co_Occurrence	NTRK3, PTPRD	74/329
GRIN2A	PREX2	4.23e-26	6.31369	1.09e-24	Co_Occurrence	GRIN2A, PREX2	79/328
ROS1	FLT1	7.95e-26	7.15854	2.02e-24	Co_Occurrence	FLT1, ROS1	69/292
PTPRT	KMT2A	2.32e-25	5.49564	5.83e-24	Co_Occurrence	KMT2A, PTPRT	91/398
TP63	ROS1	3.04e-25	6.30145	7.56e-24	Co_Occurrence	ROS1, TP63	75/311
PAK7	ERBB4	3.15e-25	5.8109	7.7e-24	Co_Occurrence	ERBB4, PAK7	81/327
NF1	CARD11	3.17e-25	6.30262	7.7e-24	Co_Occurrence	CARD11, NF1	78/354
NTRK3	PIK3C2G	3.49e-25	8.14781	8.4e-24	Co_Occurrence	NTRK3, PIK3C2G	59/247
PIK3C2G	ERBB4	3.57e-25	6.25207	8.5e-24	Co_Occurrence	ERBB4, PIK3C2G	75/308
PTPRD	ERBB4	5.27e-25	5.03689	1.24e-23	Co_Occurrence	ERBB4, PTPRD	95/380
CARD11	ROS1	5.64e-25	6.94153	1.32e-23	Co_Occurrence	CARD11, ROS1	68/294
EPHA7	TP63	5.98e-25	7.39955	1.38e-23	Co_Occurrence	EPHA7, TP63	63/261
NF1	KMT2A	6.61e-25	5.63289	1.51e-23	Co_Occurrence	KMT2A, NF1	85/368
KMT2C	ROS1	7.89e-25	5.4055	1.79e-23	Co_Occurrence	KMT2C, ROS1	86/347
NOTCH3	NF1	1.03e-24	5.57875	2.32e-23	Co_Occurrence	NF1, NOTCH3	85/369
KDR	PTPRD	1.85e-24	5.79482	4.07e-23	Co_Occurrence	KDR, PTPRD	80/349
PREX2	PTPRD	1.85e-24	5.79482	4.07e-23	Co_Occurrence	PREX2, PTPRD	80/349
PIK3C2G	KDR	1.87e-24	7.07537	4.08e-23	Co_Occurrence	KDR, PIK3C2G	64/269
FLT3	PTPRT	2.01e-24	7.17746	4.35e-23	Co_Occurrence	FLT3, PTPRT	70/374
ROS1	NOTCH4	2.18e-24	5.72363	4.66e-23	Co_Occurrence	NOTCH4, ROS1	79/328
PREX2	NF1	2.26e-24	5.62167	4.79e-23	Co_Occurrence	NF1, PREX2	83/367
PREX2	EPHA7	2.45e-24	7.4063	5.16e-23	Co_Occurrence	EPHA7, PREX2	61/257
TP63	PAK7	3.04e-24	6.38481	6.33e-23	Co_Occurrence	PAK7, TP63	70/296
ERBB4	KDR	3.43e-24	6.38595	7.08e-23	Co_Occurrence	ERBB4, KDR	70/299
ALK	ROS1	3.78e-24	6.12284	7.73e-23	Co_Occurrence	ALK, ROS1	73/312
NTRK3	NF1	5.44e-24	6.26395	1.1e-22	Co_Occurrence	NF1, NTRK3	74/353
FLT4	NF1	1.04e-23	6.36749	2.08e-22	Co_Occurrence	FLT4, NF1	72/351
NOTCH3	PTPRT	1.07e-23	5.17938	2.14e-22	Co_Occurrence	NOTCH3, PTPRT	89/403
FLT1	PIK3C2G	1.1e-23	7.43006	2.17e-22	Co_Occurrence	FLT1, PIK3C2G	59/256
PIK3C2G	PREX2	1.31e-23	6.85869	2.57e-22	Co_Occurrence	PIK3C2G, PREX2	63/271
FLT4	ROS1	1.37e-23	7.01926	2.67e-22	Co_Occurrence	FLT4, ROS1	63/289
KMT2C	KMT2D	1.7e-23	4.50032	3.28e-22	Co_Occurrence	KMT2C, KMT2D	102/420
FLT4	PTPRT	1.75e-23	6.08911	3.35e-22	Co_Occurrence	FLT4, PTPRT	76/385
CARD11	PTPRD	1.82e-23	6.07143	3.45e-22	Co_Occurrence	CARD11, PTPRD	73/340
FLT4	PTPRD	2.39e-23	6.44143	4.5e-22	Co_Occurrence	FLT4, PTPRD	69/333
EPHA7	NOTCH4	2.43e-23	6.5453	4.53e-22	Co_Occurrence	EPHA7, NOTCH4	65/282
PIK3C2G	TP63	2.69e-23	6.62364	4.98e-22	Co_Occurrence	PIK3C2G, TP63	64/277
TP63	PTPRD	5.17e-23	5.37571	9.48e-22	Co_Occurrence	PTPRD, TP63	80/357
ROS1	IL7R	5.53e-23	7.88214	1e-21	Co_Occurrence	IL7R, ROS1	56/276
GRIN2A	KDR	5.56e-23	5.66762	1e-21	Co_Occurrence	GRIN2A, KDR	75/336
PAK7	NOTCH4	6e-23	5.71264	1.08e-21	Co_Occurrence	NOTCH4, PAK7	73/315
KMT2A	KDR	6.29e-23	6.94185	1.12e-21	Co_Occurrence	KDR, KMT2A	60/263
NOTCH4	CARD11	6.88e-23	6.97051	1.21e-21	Co_Occurrence	CARD11, NOTCH4	60/268
FLT1	NF1	7.1e-23	5.78689	1.24e-21	Co_Occurrence	FLT1, NF1	75/360
NTRK3	PTPRT	7.16e-23	5.78708	1.25e-21	Co_Occurrence	NTRK3, PTPRT	77/389
STK11	KRAS	7.59e-23	6.15925	1.31e-21	Co_Occurrence	KRAS, STK11	70/339
KMT2A	NOTCH4	9.35e-23	6.33011	1.6e-21	Co_Occurrence	KMT2A, NOTCH4	65/286
FLT1	PTPRD	1.1e-22	5.89861	1.87e-21	Co_Occurrence	FLT1, PTPRD	72/342
CARD11	PAK7	1.14e-22	6.67009	1.91e-21	Co_Occurrence	CARD11, PAK7	62/281
CARD11	NOTCH3	1.14e-22	7.38996	1.91e-21	Co_Occurrence	CARD11, NOTCH3	56/249
NOTCH3	NOTCH4	1.3e-22	6.27854	2.16e-21	Co_Occurrence	NOTCH3, NOTCH4	65/287
PTPRT	MDC1	1.51e-22	6.0438	2.5e-21	Co_Occurrence	MDC1, PTPRT	73/385
FLT4	ERBB4	1.89e-22	6.87948	3.1e-21	Co_Occurrence	ERBB4, FLT4	60/281
ERBB4	NOTCH4	2.43e-22	5.47022	3.95e-21	Co_Occurrence	ERBB4, NOTCH4	74/324
TP63	NOTCH4	2.5e-22	6.17766	4.04e-21	Co_Occurrence	NOTCH4, TP63	65/289
EPHA3	ERBB4	2.72e-22	5.92472	4.37e-21	Co_Occurrence	EPHA3, ERBB4	68/305
PREX2	PAK7	2.85e-22	6.08314	4.54e-21	Co_Occurrence	PAK7, PREX2	66/296
KDR	NF1	3.65e-22	5.20152	5.77e-21	Co_Occurrence	KDR, NF1	80/373
KDR	FLT4	3.78e-22	7.80035	5.94e-21	Co_Occurrence	FLT4, KDR	52/236
TET2	ROS1	4.1e-22	6.40979	6.41e-21	Co_Occurrence	ROS1, TET2	63/297
NF1	ZFHX3	5.49e-22	4.97344	8.53e-21	Co_Occurrence	NF1, ZFHX3	83/380
KMT2A	CARD11	6.32e-22	7.19282	9.74e-21	Co_Occurrence	CARD11, KMT2A	55/250
PTPRD	IL7R	7.25e-22	6.99347	1.11e-20	Co_Occurrence	IL7R, PTPRD	60/324
ALK	ERBB4	7.7e-22	5.775	1.17e-20	Co_Occurrence	ALK, ERBB4	68/308
ROS1	KMT2B	9.62e-22	6.76678	1.45e-20	Co_Occurrence	KMT2B, ROS1	59/289
NOTCH4	PTPRD	9.69e-22	4.81312	1.46e-20	Co_Occurrence	NOTCH4, PTPRD	84/374
TET2	PTPRD	9.98e-22	5.84519	1.48e-20	Co_Occurrence	PTPRD, TET2	69/341
NOTCH3	TP63	9.98e-22	6.45951	1.48e-20	Co_Occurrence	NOTCH3, TP63	60/272
PREX2	TP63	1.05e-21	6.56461	1.55e-20	Co_Occurrence	PREX2, TP63	59/268
NTRK3	PAK7	1.09e-21	6.64401	1.6e-20	Co_Occurrence	NTRK3, PAK7	59/278
EPHA7	ERBB4	1.14e-21	5.80587	1.65e-20	Co_Occurrence	EPHA7, ERBB4	67/306
PTPRT	EPHA3	1.17e-21	4.88115	1.69e-20	Co_Occurrence	EPHA3, PTPRT	85/407
ALK	FLT4	1.45e-21	7.50751	2.09e-20	Co_Occurrence	ALK, FLT4	52/241
CARD11	EPHA7	1.49e-21	7.164	2.13e-20	Co_Occurrence	CARD11, EPHA7	54/248
PAK7	KMT2A	1.55e-21	5.83119	2.19e-20	Co_Occurrence	KMT2A, PAK7	66/301
PAK7	KDR	1.72e-21	5.90591	2.43e-20	Co_Occurrence	KDR, PAK7	65/298
ARID2	NF1	1.89e-21	5.06802	2.64e-20	Co_Occurrence	ARID2, NF1	79/375
ALK	PIK3C2G	2.81e-21	6.18479	3.92e-20	Co_Occurrence	ALK, PIK3C2G	61/280
FLT4	TP63	3.19e-21	7.34154	4.41e-20	Co_Occurrence	FLT4, TP63	52/244
SPEN	KMT2D	3.83e-21	5.2526	5.26e-20	Co_Occurrence	KMT2D, SPEN	76/385
EPHA7	NTRK3	3.96e-21	7.2768	5.42e-20	Co_Occurrence	EPHA7, NTRK3	52/243
ALK	TP63	4.76e-21	6.30599	6.48e-20	Co_Occurrence	ALK, TP63	59/273
PTPRT	TET2	6.09e-21	5.32277	8.24e-20	Co_Occurrence	PTPRT, TET2	75/395
PTPRT	IKZF1	7.22e-21	6.1376	9.7e-20	Co_Occurrence	IKZF1, PTPRT	66/383
CREBBP	KMT2D	8.11e-21	5.22545	1.08e-19	Co_Occurrence	CREBBP, KMT2D	75/385
PAK7	ALK	8.96e-21	5.66294	1.19e-19	Co_Occurrence	ALK, PAK7	65/303
ARID1A	KMT2D	9.65e-21	3.94371	1.27e-19	Co_Occurrence	ARID1A, KMT2D	104/442
ALK	GRIN2A	1.09e-20	5.13322	1.43e-19	Co_Occurrence	ALK, GRIN2A	73/345
PTPRT	ARID2	1.16e-20	4.73498	1.51e-19	Co_Occurrence	ARID2, PTPRT	83/409
PTPRT	SPEN	1.54e-20	5.0581	2.01e-19	Co_Occurrence	PTPRT, SPEN	77/400
NOTCH3	GRIN2A	1.56e-20	5.08852	2.02e-19	Co_Occurrence	GRIN2A, NOTCH3	73/346
NOTCH3	PTPRD	1.73e-20	4.93397	2.22e-19	Co_Occurrence	NOTCH3, PTPRD	76/363
KMT2A	KMT2D	1.74e-20	4.70216	2.23e-19	Co_Occurrence	KMT2A, KMT2D	82/399
CARD11	FLT4	1.86e-20	7.79482	2.36e-19	Co_Occurrence	CARD11, FLT4	47/223
KMT2D	ZFHX3	1.95e-20	4.58915	2.46e-19	Co_Occurrence	KMT2D, ZFHX3	84/403
NTRK3	KDR	2.2e-20	7.06976	2.76e-19	Co_Occurrence	KDR, NTRK3	51/244
ZFHX3	PTPRT	2.51e-20	4.50356	3.14e-19	Co_Occurrence	PTPRT, ZFHX3	86/416
PDGFRA	PTPRT	2.61e-20	5.70604	3.25e-19	Co_Occurrence	PDGFRA, PTPRT	68/388
GRIN2A	NTRK3	3.06e-20	5.71155	3.78e-19	Co_Occurrence	GRIN2A, NTRK3	64/326
IKZF1	PIK3C2G	4.11e-20	7.53183	5.03e-19	Co_Occurrence	IKZF1, PIK3C2G	48/241
FAT1	PTPRT	4.12e-20	3.7915	5.03e-19	Co_Occurrence	FAT1, PTPRT	106/456
NF1	PIK3CG	4.26e-20	5.21794	5.18e-19	Co_Occurrence	NF1, PIK3CG	71/367
PIK3C2G	NOTCH4	4.31e-20	5.50656	5.21e-19	Co_Occurrence	NOTCH4, PIK3C2G	64/302
EPHA3	ROS1	4.67e-20	5.30972	5.62e-19	Co_Occurrence	EPHA3, ROS1	67/321
FLT4	PIK3C2G	4.96e-20	6.78763	5.94e-19	Co_Occurrence	FLT4, PIK3C2G	52/255
KDR	KMT2D	5.14e-20	4.68873	6.13e-19	Co_Occurrence	KDR, KMT2D	80/398
ERBB4	ZFHX3	5.89e-20	5.25748	6.99e-19	Co_Occurrence	ERBB4, ZFHX3	67/318
PTPRT	KMT2B	5.99e-20	5.48271	7.06e-19	Co_Occurrence	KMT2B, PTPRT	69/391
EPHB1	PTPRD	7.97e-20	6.4633	9.36e-19	Co_Occurrence	EPHB1, PTPRD	57/328
ERBB4	IL7R	8.07e-20	7.0198	9.42e-19	Co_Occurrence	ERBB4, IL7R	51/272
FAT1	PTPRD	1.15e-19	4.0189	1.34e-18	Co_Occurrence	FAT1, PTPRD	94/414
FLT4	NOTCH4	1.94e-19	6.41103	2.24e-18	Co_Occurrence	FLT4, NOTCH4	53/267
FLT1	GRIN2A	1.95e-19	5.34209	2.24e-18	Co_Occurrence	FLT1, GRIN2A	65/333
FAT1	KMT2D	2.08e-19	3.76867	2.38e-18	Co_Occurrence	FAT1, KMT2D	102/447
PTPRT	ATR	2.15e-19	5.65437	2.45e-18	Co_Occurrence	ATR, PTPRT	65/388
ZFHX3	PTPRD	2.17e-19	4.64288	2.46e-18	Co_Occurrence	PTPRD, ZFHX3	76/370
ZFHX3	EPHA7	2.26e-19	5.87798	2.55e-18	Co_Occurrence	EPHA7, ZFHX3	57/278
KDR	EPHA7	2.36e-19	6.07841	2.64e-18	Co_Occurrence	EPHA7, KDR	55/269
PTPRD	FLT3	2.36e-19	6.1156	2.64e-18	Co_Occurrence	FLT3, PTPRD	58/332
PTPRT	BRCA2	2.61e-19	4.96252	2.9e-18	Co_Occurrence	BRCA2, PTPRT	73/400
ROS1	NTRK3	2.65e-19	5.76032	2.93e-18	Co_Occurrence	NTRK3, ROS1	59/303
KMT2C	PTPRT	2.69e-19	3.8615	2.96e-18	Co_Occurrence	KMT2C, PTPRT	98/445
ERBB4	CARD11	3.52e-19	5.6764	3.86e-18	Co_Occurrence	CARD11, ERBB4	59/298
CARD11	KDR	3.71e-19	6.48832	4.04e-18	Co_Occurrence	CARD11, KDR	51/253
FLT4	GRIN2A	4.9e-19	5.56203	5.32e-18	Co_Occurrence	FLT4, GRIN2A	61/326
PIK3CG	PTPRT	4.94e-19	4.81453	5.33e-18	Co_Occurrence	PIK3CG, PTPRT	74/403
FLT4	ZFHX3	5.4e-19	6.57888	5.81e-18	Co_Occurrence	FLT4, ZFHX3	50/253
PIK3CG	NOTCH4	5.65e-19	5.96164	6.05e-18	Co_Occurrence	NOTCH4, PIK3CG	55/277
ALK	NOTCH4	6.8e-19	5.43833	7.24e-18	Co_Occurrence	ALK, NOTCH4	60/296
KMT2A	ERBB4	7.05e-19	5.14483	7.47e-18	Co_Occurrence	ERBB4, KMT2A	64/316
PTPRT	KMT2D	7.42e-19	3.27221	7.83e-18	Co_Occurrence	KMT2D, PTPRT	124/507
NF1	EP300	7.62e-19	5.46656	8.01e-18	Co_Occurrence	EP300, NF1	63/359
ERBB4	PREX2	7.73e-19	5.20827	8.09e-18	Co_Occurrence	ERBB4, PREX2	63/313
ROS1	NOTCH3	8.93e-19	4.98935	9.3e-18	Co_Occurrence	NOTCH3, ROS1	66/327
NOTCH3	ERBB4	9.59e-19	5.10298	9.94e-18	Co_Occurrence	ERBB4, NOTCH3	64/317
ARID1B	KMT2D	1.04e-18	5.24168	1.08e-17	Co_Occurrence	ARID1B, KMT2D	66/381
FLT1	PAK7	1.05e-18	5.6761	1.08e-17	Co_Occurrence	FLT1, PAK7	57/291
GRIN2A	FLT3	1.19e-18	6.08172	1.21e-17	Co_Occurrence	FLT3, GRIN2A	55/315
PAK7	FLT4	1.24e-18	5.98018	1.26e-17	Co_Occurrence	FLT4, PAK7	54/282
FAT1	ARID2	1.27e-18	4.90417	1.29e-17	Co_Occurrence	ARID2, FAT1	67/337
KMT2A	PTPRD	1.34e-18	4.59972	1.35e-17	Co_Occurrence	KMT2A, PTPRD	73/368
FLT4	EPHA7	1.37e-18	6.66178	1.38e-17	Co_Occurrence	EPHA7, FLT4	48/245
PIK3CG	ERBB4	1.42e-18	5.55194	1.42e-17	Co_Occurrence	ERBB4, PIK3CG	58/299
NF1	IL7R	1.51e-18	5.88016	1.51e-17	Co_Occurrence	IL7R, NF1	58/352
ALK	KMT2D	1.66e-18	4.35956	1.65e-17	Co_Occurrence	ALK, KMT2D	79/405
KMT2D	NOTCH4	1.67e-18	4.06573	1.65e-17	Co_Occurrence	KMT2D, NOTCH4	86/419
IL7R	TP63	1.78e-18	7.35342	1.75e-17	Co_Occurrence	IL7R, TP63	44/233
ANKRD11	KMT2D	1.78e-18	5.7367	1.75e-17	Co_Occurrence	ANKRD11, KMT2D	60/373
KMT2C	NF1	1.87e-18	3.89898	1.82e-17	Co_Occurrence	KMT2C, NF1	90/419
FLT1	ERBB4	1.99e-18	5.49789	1.93e-17	Co_Occurrence	ERBB4, FLT1	58/300
FLT3	PAK7	2.38e-18	6.54478	2.3e-17	Co_Occurrence	FLT3, PAK7	49/269
NOTCH3	KMT2D	2.42e-18	4.31967	2.33e-17	Co_Occurrence	KMT2D, NOTCH3	79/406
KMT2B	PAK7	2.62e-18	6.09082	2.52e-17	Co_Occurrence	KMT2B, PAK7	52/278
FLT1	TP63	2.78e-18	6.10902	2.66e-17	Co_Occurrence	FLT1, TP63	51/261
MET	PTPRT	2.92e-18	5.51388	2.78e-17	Co_Occurrence	MET, PTPRT	62/389
PAK7	ZFHX3	2.98e-18	5.01091	2.82e-17	Co_Occurrence	PAK7, ZFHX3	63/315
ROS1	KMT2D	3.07e-18	3.74188	2.9e-17	Co_Occurrence	KMT2D, ROS1	96/441
PIK3C2G	KMT2A	3.32e-18	5.45154	3.12e-17	Co_Occurrence	KMT2A, PIK3C2G	57/288
KMT2D	KMT2B	3.45e-18	5.14537	3.23e-17	Co_Occurrence	KMT2B, KMT2D	65/382
BRCA2	NF1	3.59e-18	4.90795	3.35e-17	Co_Occurrence	BRCA2, NF1	67/370
SPEN	ERBB4	3.88e-18	5.39234	3.6e-17	Co_Occurrence	ERBB4, SPEN	58/302
ZFHX3	GRIN2A	3.96e-18	4.54729	3.67e-17	Co_Occurrence	GRIN2A, ZFHX3	71/357
ATR	TP63	4.22e-18	6.93772	3.89e-17	Co_Occurrence	ATR, TP63	45/239
ALK	ARID1A	5.24e-18	4.72345	4.81e-17	Co_Occurrence	ALK, ARID1A	67/341
GRIN2A	FAT1	5.32e-18	3.89338	4.85e-17	Co_Occurrence	FAT1, GRIN2A	87/405
MET	PTPRD	5.33e-18	5.77402	4.85e-17	Co_Occurrence	MET, PTPRD	56/335
ALK	EPHA7	5.39e-18	5.65304	4.89e-17	Co_Occurrence	ALK, EPHA7	54/276
NOTCH4	IKZF1	5.59e-18	6.61323	5.05e-17	Co_Occurrence	IKZF1, NOTCH4	47/257
PTPRS	FLT4	5.62e-18	8.05238	5.06e-17	Co_Occurrence	FLT4, PTPRS	39/202
CARD11	IL7R	5.71e-18	7.8305	5.12e-17	Co_Occurrence	CARD11, IL7R	40/210
EP300	ZFHX3	5.74e-18	6.53859	5.12e-17	Co_Occurrence	EP300, ZFHX3	47/249
IL7R	GRIN2A	7.48e-18	5.98196	6.65e-17	Co_Occurrence	GRIN2A, IL7R	53/315
MDC1	ERBB4	7.9e-18	5.79522	7e-17	Co_Occurrence	ERBB4, MDC1	53/289
ALK	CARD11	8.21e-18	6.02632	7.25e-17	Co_Occurrence	ALK, CARD11	50/260
ARID1A	ARID1B	9.31e-18	5.52825	8.19e-17	Co_Occurrence	ARID1A, ARID1B	56/313
KMT2B	NF1	9.88e-18	5.15434	8.65e-17	Co_Occurrence	KMT2B, NF1	62/363
NF1	ATR	1.16e-17	5.40756	1.01e-16	Co_Occurrence	ATR, NF1	59/358
PTPRD	MDC1	1.3e-17	5.2096	1.13e-16	Co_Occurrence	MDC1, PTPRD	60/345
NOTCH3	KMT2B	1.53e-17	6.46403	1.33e-16	Co_Occurrence	KMT2B, NOTCH3	46/246
ZFHX3	SPEN	1.66e-17	5.78543	1.43e-16	Co_Occurrence	SPEN, ZFHX3	51/268
KMT2B	GRIN2A	1.88e-17	5.3596	1.61e-16	Co_Occurrence	GRIN2A, KMT2B	57/326
MDC1	ROS1	1.94e-17	5.56225	1.66e-16	Co_Occurrence	MDC1, ROS1	54/301
ALK	NOTCH3	2e-17	5.43956	1.7e-16	Co_Occurrence	ALK, NOTCH3	54/281
IL7R	PAK7	2.14e-17	6.38047	1.82e-16	Co_Occurrence	IL7R, PAK7	47/269
MDC1	NF1	2.31e-17	5.02498	1.95e-16	Co_Occurrence	MDC1, NF1	62/365
BRCA2	SPEN	2.31e-17	6.48967	1.95e-16	Co_Occurrence	BRCA2, SPEN	45/238
FLT4	KMT2D	2.34e-17	4.79253	1.97e-16	Co_Occurrence	FLT4, KMT2D	66/388
NOTCH3	PIK3C2G	2.35e-17	5.23988	1.97e-16	Co_Occurrence	NOTCH3, PIK3C2G	56/291
PIK3CG	ROS1	2.44e-17	5.13839	2.04e-16	Co_Occurrence	PIK3CG, ROS1	58/313
KMT2B	KDR	2.61e-17	6.49214	2.17e-16	Co_Occurrence	KDR, KMT2B	45/242
GRIN2A	ARID2	2.64e-17	4.54898	2.19e-16	Co_Occurrence	ARID2, GRIN2A	67/352
NF1	PGR	2.65e-17	5.69668	2.19e-16	Co_Occurrence	NF1, PGR	55/353
KMT2A	GRIN2A	2.9e-17	4.4805	2.38e-16	Co_Occurrence	GRIN2A, KMT2A	68/355
ZFHX3	IKZF1	2.98e-17	6.67004	2.44e-16	Co_Occurrence	IKZF1, ZFHX3	44/243
KMT2A	EPHA7	3.03e-17	5.46661	2.47e-16	Co_Occurrence	EPHA7, KMT2A	53/278
PDGFRA	NF1	3.09e-17	5.15155	2.52e-16	Co_Occurrence	NF1, PDGFRA	60/362
KMT2A	TP63	3.33e-17	5.35828	2.7e-16	Co_Occurrence	KMT2A, TP63	54/283
HGF	PIK3C2G	3.55e-17	6.31619	2.87e-16	Co_Occurrence	HGF, PIK3C2G	46/253
PREX2	KDR	3.64e-17	5.5336	2.93e-16	Co_Occurrence	KDR, PREX2	52/274
KMT2C	PTPRD	3.67e-17	3.81666	2.94e-16	Co_Occurrence	KMT2C, PTPRD	84/407
KMT2B	CREBBP	3.67e-17	6.89393	2.94e-16	Co_Occurrence	CREBBP, KMT2B	42/225
NOTCH3	EPHA7	3.9e-17	5.4255	3.11e-16	Co_Occurrence	EPHA7, NOTCH3	53/279
KMT2B	PIK3C2G	4.01e-17	6.14107	3.19e-16	Co_Occurrence	KMT2B, PIK3C2G	47/257
ATR	PIK3C2G	4.26e-17	6.43538	3.37e-16	Co_Occurrence	ATR, PIK3C2G	45/250
IKZF1	NOTCH3	4.74e-17	6.71654	3.74e-16	Co_Occurrence	IKZF1, NOTCH3	43/238
ANKRD11	ALK	4.9e-17	6.89691	3.85e-16	Co_Occurrence	ALK, ANKRD11	42/234
GRIN2A	EPHA3	5.03e-17	4.47101	3.94e-16	Co_Occurrence	EPHA3, GRIN2A	67/354
IKZF1	ROS1	5.2e-17	5.85702	4.06e-16	Co_Occurrence	IKZF1, ROS1	50/293
ALK	KMT2C	5.3e-17	4.71393	4.13e-16	Co_Occurrence	ALK, KMT2C	62/325
FLT3	NF1	5.6e-17	5.33964	4.34e-16	Co_Occurrence	FLT3, NF1	57/358
KEAP1	KRAS	6.7e-17	4.88679	5.18e-16	Co_Occurrence	KEAP1, KRAS	61/353
HGF	PTPRT	6.94e-17	4.91348	5.34e-16	Co_Occurrence	HGF, PTPRT	63/397
SPEN	IL7R	6.95e-17	7.36074	5.34e-16	Co_Occurrence	IL7R, SPEN	39/214
KMT2B	ZFHX3	7.02e-17	6.15376	5.38e-16	Co_Occurrence	KMT2B, ZFHX3	46/253
KMT2D	PTPRD	7.43e-17	3.28054	5.67e-16	Co_Occurrence	KMT2D, PTPRD	106/477
GRIN2A	BRCA2	7.75e-17	4.87837	5.89e-16	Co_Occurrence	BRCA2, GRIN2A	60/337
TET2	TP63	7.89e-17	5.84792	5.98e-16	Co_Occurrence	TET2, TP63	48/260
NTRK3	ERBB4	8.74e-17	5.27124	6.6e-16	Co_Occurrence	ERBB4, NTRK3	54/299
NF1	KMT2D	9.29e-17	3.18132	7e-16	Co_Occurrence	KMT2D, NF1	111/491
TET2	FAT1	9.36e-17	4.97571	7.02e-16	Co_Occurrence	FAT1, TET2	58/325
ARID2	PTPRD	9.99e-17	4.31665	7.48e-16	Co_Occurrence	ARID2, PTPRD	69/371
HGF	NF1	1.04e-16	5.04802	7.74e-16	Co_Occurrence	HGF, NF1	59/363
KMT2D	FLT1	1.04e-16	4.40641	7.75e-16	Co_Occurrence	FLT1, KMT2D	69/397
FAT1	NF1	1.1e-16	3.51256	8.12e-16	Co_Occurrence	FAT1, NF1	93/440
EPHA7	FLT1	1.12e-16	5.77216	8.3e-16	Co_Occurrence	EPHA7, FLT1	48/260
ERBB4	KMT2B	1.27e-16	5.51985	9.37e-16	Co_Occurrence	ERBB4, KMT2B	51/291
KDR	NOTCH4	1.28e-16	4.99379	9.4e-16	Co_Occurrence	KDR, NOTCH4	56/299
MDC1	ZFHX3	1.31e-16	6.02415	9.57e-16	Co_Occurrence	MDC1, ZFHX3	46/255
ERBB4	PGR	1.33e-16	6.17848	9.73e-16	Co_Occurrence	ERBB4, PGR	46/277
PAK7	IKZF1	1.39e-16	5.97731	1.01e-15	Co_Occurrence	IKZF1, PAK7	47/274
NTRK3	FLT3	1.41e-16	7.36282	1.02e-15	Co_Occurrence	FLT3, NTRK3	38/209
PTPRD	KMT2B	1.55e-16	4.99771	1.12e-15	Co_Occurrence	KMT2B, PTPRD	58/347
PIK3CG	PIK3C2G	1.56e-16	5.50478	1.12e-15	Co_Occurrence	PIK3C2G, PIK3CG	50/273
ROS1	ATR	1.63e-16	5.63429	1.17e-15	Co_Occurrence	ATR, ROS1	50/296
ZFHX3	KDR	1.67e-16	5.1926	1.2e-15	Co_Occurrence	KDR, ZFHX3	53/285
CREBBP	ARID1A	1.69e-16	4.8085	1.2e-15	Co_Occurrence	ARID1A, CREBBP	59/329
EPHA3	PTPRD	1.92e-16	4.24147	1.37e-15	Co_Occurrence	EPHA3, PTPRD	69/373
SPEN	EPHA7	1.93e-16	5.67078	1.37e-15	Co_Occurrence	EPHA7, SPEN	48/262
NTRK3	PIK3CG	2.04e-16	6.31941	1.44e-15	Co_Occurrence	NTRK3, PIK3CG	43/236
KMT2B	EPHA7	2.09e-16	6.19196	1.47e-15	Co_Occurrence	EPHA7, KMT2B	44/245
GRIN2A	MDC1	2.12e-16	5.05945	1.49e-15	Co_Occurrence	GRIN2A, MDC1	56/330
NOTCH4	PTPRS	2.31e-16	6.10484	1.62e-15	Co_Occurrence	NOTCH4, PTPRS	45/261
SPEN	NOTCH4	2.56e-16	5.23591	1.79e-15	Co_Occurrence	NOTCH4, SPEN	52/286
FLT4	PIK3CG	2.67e-16	6.41858	1.86e-15	Co_Occurrence	FLT4, PIK3CG	42/232
ALK	FLT1	2.84e-16	5.60369	1.97e-15	Co_Occurrence	ALK, FLT1	48/264
TERT	NF1	3.27e-16	5.45203	2.26e-15	Co_Occurrence	NF1, TERT	53/355
FLT1	PIK3CG	3.28e-16	6.06884	2.26e-15	Co_Occurrence	FLT1, PIK3CG	44/243
ROS1	KMT2A	3.45e-16	4.48328	2.37e-15	Co_Occurrence	KMT2A, ROS1	62/334
PTPRD	TERT	3.7e-16	5.56624	2.53e-15	Co_Occurrence	PTPRD, TERT	51/335
KMT2C	EPHA7	3.71e-16	4.5894	2.53e-15	Co_Occurrence	EPHA7, KMT2C	60/325
ARID2	ROS1	3.71e-16	4.53572	2.53e-15	Co_Occurrence	ARID2, ROS1	61/331
HGF	PTPRD	3.72e-16	5.03573	2.53e-15	Co_Occurrence	HGF, PTPRD	56/345
HGF	PAK7	3.91e-16	5.634	2.65e-15	Co_Occurrence	HGF, PAK7	48/280
MET	PAK7	4.05e-16	5.89472	2.74e-15	Co_Occurrence	MET, PAK7	46/274
PIK3CG	GRIN2A	4.37e-16	4.63429	2.94e-15	Co_Occurrence	GRIN2A, PIK3CG	60/342
TET2	KDR	4.46e-16	5.75315	3e-15	Co_Occurrence	KDR, TET2	46/256
PAK7	MGA	4.81e-16	5.06672	3.23e-15	Co_Occurrence	MGA, PAK7	53/297
ZFHX3	KMT2A	5.91e-16	4.99677	3.95e-15	Co_Occurrence	KMT2A, ZFHX3	53/290
FLT4	IL7R	6.04e-16	7.40986	4.02e-15	Co_Occurrence	FLT4, IL7R	36/203
IKZF1	KDR	6.11e-16	6.4406	4.06e-15	Co_Occurrence	IKZF1, KDR	41/236
BRCA2	ROS1	6.21e-16	4.89939	4.12e-15	Co_Occurrence	BRCA2, ROS1	55/314
ALK	PREX2	6.77e-16	5.14781	4.46e-15	Co_Occurrence	ALK, PREX2	51/281
KMT2A	PREX2	6.77e-16	5.14781	4.46e-15	Co_Occurrence	KMT2A, PREX2	51/281
CARD11	SPEN	6.93e-16	5.9135	4.55e-15	Co_Occurrence	CARD11, SPEN	44/246
ZFHX3	NOTCH3	7.57e-16	4.95895	4.96e-15	Co_Occurrence	NOTCH3, ZFHX3	53/291
NOTCH3	FAT1	8.16e-16	4.28321	5.33e-15	Co_Occurrence	FAT1, NOTCH3	64/349
NOTCH3	KDR	8.59e-16	5.10839	5.59e-15	Co_Occurrence	KDR, NOTCH3	51/282
HGF	PDGFRA	8.9e-16	7.27904	5.78e-15	Co_Occurrence	HGF, PDGFRA	36/203
ATR	KMT2C	1.12e-15	5.47759	7.27e-15	Co_Occurrence	ATR, KMT2C	48/291
PIK3C2G	CARD11	1.13e-15	5.26368	7.27e-15	Co_Occurrence	CARD11, PIK3C2G	49/276
ERBB4	KMT2D	1.15e-15	3.4675	7.38e-15	Co_Occurrence	ERBB4, KMT2D	88/443
NTRK3	FAT1	1.15e-15	4.76185	7.39e-15	Co_Occurrence	FAT1, NTRK3	56/327
PTPRT	ATM	1.19e-15	4.00406	7.64e-15	Co_Occurrence	ATM, PTPRT	72/419
NF1	POLE	1.21e-15	4.46162	7.72e-15	Co_Occurrence	NF1, POLE	62/375
MDC1	NOTCH4	1.25e-15	5.49145	7.94e-15	Co_Occurrence	MDC1, NOTCH4	47/273
KDR	TP63	1.37e-15	5.03388	8.73e-15	Co_Occurrence	KDR, TP63	51/284
CREBBP	PTPRS	1.45e-15	6.73906	9.17e-15	Co_Occurrence	CREBBP, PTPRS	38/219
TP63	NTRK3	1.49e-15	5.53103	9.4e-15	Co_Occurrence	NTRK3, TP63	46/262
NTRK3	PREX2	1.5e-15	5.64215	9.42e-15	Co_Occurrence	NTRK3, PREX2	45/256
KMT2A	CREBBP	1.58e-15	5.40161	9.93e-15	Co_Occurrence	CREBBP, KMT2A	47/266
NOTCH4	NOTCH1	1.67e-15	5.1152	1.05e-14	Co_Occurrence	NOTCH1, NOTCH4	50/285
PTPRD	IKZF1	2.02e-15	5.03547	1.26e-14	Co_Occurrence	IKZF1, PTPRD	53/343
KMT2B	FLT4	2.11e-15	6.61919	1.32e-14	Co_Occurrence	FLT4, KMT2B	38/218
KMT2C	PTPRS	2.16e-15	5.47506	1.34e-14	Co_Occurrence	KMT2C, PTPRS	47/290
MGA	NOTCH4	2.22e-15	5.06888	1.38e-14	Co_Occurrence	MGA, NOTCH4	50/286
EPHA3	TP63	2.23e-15	4.95698	1.38e-14	Co_Occurrence	EPHA3, TP63	51/286
KMT2A	ALK	2.26e-15	4.95488	1.39e-14	Co_Occurrence	ALK, KMT2A	51/286
NTRK3	IL7R	2.33e-15	7.02354	1.44e-14	Co_Occurrence	IL7R, NTRK3	36/209
KMT2D	POLE	2.47e-15	4.2991	1.51e-14	Co_Occurrence	KMT2D, POLE	64/396
TERT	GRIN2A	2.47e-15	5.46929	1.51e-14	Co_Occurrence	GRIN2A, TERT	48/318
EPHB1	ERBB4	2.48e-15	5.69139	1.51e-14	Co_Occurrence	EPHB1, ERBB4	45/282
KMT2C	PIK3C2G	2.49e-15	4.23168	1.51e-14	Co_Occurrence	KMT2C, PIK3C2G	62/339
TERT	PTPRT	2.56e-15	5.02805	1.55e-14	Co_Occurrence	PTPRT, TERT	55/393
NOTCH3	IL7R	2.65e-15	6.27953	1.6e-14	Co_Occurrence	IL7R, NOTCH3	40/239
PDGFRA	PTPRD	2.73e-15	4.80366	1.65e-14	Co_Occurrence	PDGFRA, PTPRD	55/348
PIK3CG	EPHA7	2.76e-15	5.40748	1.66e-14	Co_Occurrence	EPHA7, PIK3CG	46/263
SPEN	PTPRD	2.77e-15	4.3036	1.66e-14	Co_Occurrence	PTPRD, SPEN	62/364
KMT2A	NOTCH3	2.86e-15	4.91785	1.71e-14	Co_Occurrence	KMT2A, NOTCH3	51/287
KMT2B	KMT2A	2.93e-15	5.77803	1.75e-14	Co_Occurrence	KMT2A, KMT2B	43/251
ROS1	NOTCH2	3.46e-15	5.29223	2.06e-14	Co_Occurrence	NOTCH2, ROS1	48/299
ALK	ARID2	3.47e-15	4.97277	2.06e-14	Co_Occurrence	ALK, ARID2	50/283
ERBB4	FLT3	3.71e-15	5.4759	2.2e-14	Co_Occurrence	ERBB4, FLT3	46/286
NOTCH4	CREBBP	3.88e-15	4.97625	2.29e-14	Co_Occurrence	CREBBP, NOTCH4	50/288
NTRK3	ZFHX3	4.24e-15	5.34088	2.5e-14	Co_Occurrence	NTRK3, ZFHX3	46/267
ZFHX3	PREX2	4.32e-15	4.85519	2.54e-14	Co_Occurrence	PREX2, ZFHX3	51/289
FLT1	EPHA3	4.44e-15	5.32032	2.6e-14	Co_Occurrence	EPHA3, FLT1	46/265
BRCA2	ANKRD11	4.47e-15	6.84443	2.62e-14	Co_Occurrence	ANKRD11, BRCA2	36/212
ROS1	MET	4.48e-15	5.35955	2.62e-14	Co_Occurrence	MET, ROS1	47/297
FAT1	NOTCH4	4.69e-15	3.89666	2.73e-14	Co_Occurrence	FAT1, NOTCH4	68/368
EPHB1	NOTCH4	4.74e-15	5.89517	2.75e-14	Co_Occurrence	EPHB1, NOTCH4	42/260
SPEN	KDR	4.75e-15	5.30631	2.75e-14	Co_Occurrence	KDR, SPEN	46/265
ARID1B	NOTCH3	4.77e-15	5.67796	2.75e-14	Co_Occurrence	ARID1B, NOTCH3	43/253
KMT2D	MTOR	4.77e-15	4.861	2.75e-14	Co_Occurrence	KMT2D, MTOR	55/382
KMT2D	PIK3C2G	5.14e-15	3.67292	2.95e-14	Co_Occurrence	KMT2D, PIK3C2G	77/423
HGF	ROS1	5.26e-15	5.10649	3.02e-14	Co_Occurrence	HGF, ROS1	49/303
ZFHX3	FAT1	5.89e-15	4.05136	3.37e-14	Co_Occurrence	FAT1, ZFHX3	64/356
PTPRT	POLE	6.31e-15	4.1589	3.6e-14	Co_Occurrence	POLE, PTPRT	65/411
NOTCH3	KMT2C	6.56e-15	4.27889	3.74e-14	Co_Occurrence	KMT2C, NOTCH3	59/332
SPEN	NF1	6.66e-15	4.12406	3.78e-14	Co_Occurrence	NF1, SPEN	64/384
TP63	ARID2	6.89e-15	4.8646	3.9e-14	Co_Occurrence	ARID2, TP63	50/286
TET2	ZFHX3	7.27e-15	5.24067	4.11e-14	Co_Occurrence	TET2, ZFHX3	46/269
FLT3	FLT1	7.31e-15	6.51111	4.12e-14	Co_Occurrence	FLT1, FLT3	37/220
CARD11	KMT2D	8.08e-15	4.04175	4.55e-14	Co_Occurrence	CARD11, KMT2D	66/403
CREBBP	ZFHX3	8.78e-15	5.10289	4.92e-14	Co_Occurrence	CREBBP, ZFHX3	47/274
NOTCH3	FLT3	9.13e-15	5.98382	5.11e-14	Co_Occurrence	FLT3, NOTCH3	40/243
IL7R	NOTCH4	9.23e-15	5.74595	5.15e-14	Co_Occurrence	IL7R, NOTCH4	42/262
MGA	ROS1	1.02e-14	4.55849	5.7e-14	Co_Occurrence	MGA, ROS1	54/320
FLT3	TERT	1.09e-14	7.83414	6.06e-14	Co_Occurrence	FLT3, TERT	31/183
PTPRS	NF1	1.12e-14	4.72996	6.21e-14	Co_Occurrence	NF1, PTPRS	54/365
MGA	EPHA7	1.15e-14	5.2537	6.37e-14	Co_Occurrence	EPHA7, MGA	45/264
NOTCH3	BRCA2	1.19e-14	5.25293	6.56e-14	Co_Occurrence	BRCA2, NOTCH3	45/265
IL7R	PIK3CG	1.27e-14	6.56367	7.02e-14	Co_Occurrence	IL7R, PIK3CG	36/217
PTPRS	KMT2D	1.3e-14	4.61312	7.13e-14	Co_Occurrence	KMT2D, PTPRS	56/386
IL7R	ALK	1.37e-14	6.05158	7.52e-14	Co_Occurrence	ALK, IL7R	39/240
ROS1	CDKN2A	1.39e-14	3.64974	7.61e-14	Co_Occurrence	CDKN2A, ROS1	72/384
NOTCH2	ZFHX3	1.39e-14	5.74723	7.61e-14	Co_Occurrence	NOTCH2, ZFHX3	41/251
MET	ERBB4	1.44e-14	5.33141	7.82e-14	Co_Occurrence	ERBB4, MET	45/287
FLT4	EPHA3	1.45e-14	5.4459	7.84e-14	Co_Occurrence	EPHA3, FLT4	43/256
POLE	KMT2C	1.5e-14	4.72333	8.1e-14	Co_Occurrence	KMT2C, POLE	51/308
EPHB1	NF1	1.52e-14	4.85925	8.2e-14	Co_Occurrence	EPHB1, NF1	52/362
PTPRD	BRCA2	1.56e-14	4.25993	8.39e-14	Co_Occurrence	BRCA2, PTPRD	59/362
FLT1	IL7R	1.56e-14	6.51011	8.41e-14	Co_Occurrence	FLT1, IL7R	36/218
TET2	CARD11	1.57e-14	5.66861	8.43e-14	Co_Occurrence	CARD11, TET2	41/243
KMT2B	SPEN	1.59e-14	5.96242	8.53e-14	Co_Occurrence	KMT2B, SPEN	39/233
FLT4	TET2	1.6e-14	5.95467	8.53e-14	Co_Occurrence	FLT4, TET2	39/232
NOTCH4	ZFHX3	1.64e-14	4.38016	8.74e-14	Co_Occurrence	NOTCH4, ZFHX3	55/314
FLT3	KDR	1.78e-14	5.97517	9.48e-14	Co_Occurrence	FLT3, KDR	39/239
TP63	IKZF1	1.79e-14	5.83125	9.49e-14	Co_Occurrence	IKZF1, TP63	40/246
NOTCH2	KMT2A	1.84e-14	5.81697	9.76e-14	Co_Occurrence	KMT2A, NOTCH2	40/245
FAT1	FLT3	1.89e-14	5.03027	9.99e-14	Co_Occurrence	FAT1, FLT3	48/314
KMT2B	NOTCH4	2e-14	5.19735	1.05e-13	Co_Occurrence	KMT2B, NOTCH4	45/275
NOTCH1	KMT2A	2.08e-14	5.14806	1.09e-13	Co_Occurrence	KMT2A, NOTCH1	45/267
NOTCH3	PAK7	2.26e-14	4.28448	1.18e-13	Co_Occurrence	NOTCH3, PAK7	56/322
CREBBP	PTPRT	2.26e-14	3.90262	1.18e-13	Co_Occurrence	CREBBP, PTPRT	67/418
GRIN2A	MET	2.28e-14	4.9367	1.19e-13	Co_Occurrence	GRIN2A, MET	49/326
FLT3	MDC1	2.38e-14	6.78909	1.24e-13	Co_Occurrence	FLT3, MDC1	34/205
PTPRD	DOT1L	2.38e-14	4.89846	1.24e-13	Co_Occurrence	DOT1L, PTPRD	50/343
PIK3C2G	APC	2.39e-14	4.06319	1.24e-13	Co_Occurrence	APC, PIK3C2G	60/340
PIK3C2G	TET2	2.42e-14	5.03171	1.25e-13	Co_Occurrence	PIK3C2G, TET2	46/275
KMT2C	ARID2	2.49e-14	4.22487	1.29e-13	Co_Occurrence	ARID2, KMT2C	57/330
ARID1B	ERBB4	2.57e-14	4.89553	1.32e-13	Co_Occurrence	ARID1B, ERBB4	48/298
FLT4	PDGFRA	2.58e-14	6.35242	1.33e-13	Co_Occurrence	FLT4, PDGFRA	36/217
TET2	GRIN2A	2.6e-14	4.34099	1.33e-13	Co_Occurrence	GRIN2A, TET2	56/344
MGA	ZFHX3	2.69e-14	5.0066	1.37e-13	Co_Occurrence	MGA, ZFHX3	46/274
TP63	ZFHX3	2.82e-14	4.57098	1.44e-13	Co_Occurrence	TP63, ZFHX3	51/297
NTRK3	NOTCH3	2.9e-14	5.19676	1.48e-13	Co_Occurrence	NOTCH3, NTRK3	44/264
MGA	NF1	2.93e-14	4.04903	1.49e-13	Co_Occurrence	MGA, NF1	62/384
EPHB1	ZFHX3	3.13e-14	5.87499	1.59e-13	Co_Occurrence	EPHB1, ZFHX3	39/246
KMT2A	PIK3CG	3.43e-14	5.05773	1.74e-13	Co_Occurrence	KMT2A, PIK3CG	45/269
PIK3CG	ZFHX3	3.46e-14	4.9632	1.75e-13	Co_Occurrence	PIK3CG, ZFHX3	46/275
PTPRT	APC	3.5e-14	3.19581	1.76e-13	Co_Occurrence	APC, PTPRT	88/462
SPEN	FAT1	3.62e-14	4.27043	1.82e-13	Co_Occurrence	FAT1, SPEN	56/338
GRIN2A	KMT2C	3.75e-14	3.46804	1.88e-13	Co_Occurrence	GRIN2A, KMT2C	75/402
IL7R	KMT2B	3.77e-14	6.88462	1.89e-13	Co_Occurrence	IL7R, KMT2B	33/201
KMT2C	MTOR	4.27e-14	5.25186	2.13e-13	Co_Occurrence	KMT2C, MTOR	44/290
TET2	KMT2D	4.5e-14	3.98794	2.24e-13	Co_Occurrence	KMT2D, TET2	63/402
KMT2A	FLT3	4.52e-14	5.76742	2.25e-13	Co_Occurrence	FLT3, KMT2A	39/244
ROS1	PTPRS	4.73e-14	5.02546	2.34e-13	Co_Occurrence	PTPRS, ROS1	46/301
BRCA2	ZFHX3	4.9e-14	5.00085	2.43e-13	Co_Occurrence	BRCA2, ZFHX3	45/272
SPEN	PIK3C2G	4.95e-14	4.81257	2.44e-13	Co_Occurrence	PIK3C2G, SPEN	47/282
MGA	TP63	4.95e-14	4.99449	2.44e-13	Co_Occurrence	MGA, TP63	45/271
ROS1	FAT1	5.14e-14	3.4692	2.53e-13	Co_Occurrence	FAT1, ROS1	74/398
FLT1	NOTCH3	5.4e-14	4.97746	2.65e-13	Co_Occurrence	FLT1, NOTCH3	45/271
NTRK3	CARD11	5.56e-14	5.5369	2.72e-13	Co_Occurrence	CARD11, NTRK3	40/243
NTRK3	FLT1	5.56e-14	5.5369	2.72e-13	Co_Occurrence	FLT1, NTRK3	40/243
EP300	SPEN	5.71e-14	5.8238	2.78e-13	Co_Occurrence	EP300, SPEN	38/233
EPHB1	FLT1	5.83e-14	6.35639	2.84e-13	Co_Occurrence	EPHB1, FLT1	35/218
KMT2D	GRIN2A	6.31e-14	3.01046	3.06e-13	Co_Occurrence	GRIN2A, KMT2D	95/476
FLT3	IL7R	6.4e-14	7.21948	3.1e-13	Co_Occurrence	FLT3, IL7R	31/190
PREX2	NOTCH4	6.46e-14	4.38738	3.13e-13	Co_Occurrence	NOTCH4, PREX2	52/307
ATR	EPHA7	6.76e-14	5.66576	3.27e-13	Co_Occurrence	ATR, EPHA7	39/244
NOTCH4	TET2	6.96e-14	4.77145	3.35e-13	Co_Occurrence	NOTCH4, TET2	47/287
NOTCH3	DOT1L	7.32e-14	5.81743	3.52e-13	Co_Occurrence	DOT1L, NOTCH3	38/242
FLT4	FLT1	7.57e-14	5.60838	3.63e-13	Co_Occurrence	FLT1, FLT4	39/239
EP300	KMT2D	7.63e-14	4.20723	3.65e-13	Co_Occurrence	EP300, KMT2D	58/394
CARD11	PREX2	7.94e-14	5.00595	3.79e-13	Co_Occurrence	CARD11, PREX2	44/267
IL7R	IKZF1	8.08e-14	7.14257	3.85e-13	Co_Occurrence	IKZF1, IL7R	31/191
EP300	IKZF1	8.54e-14	6.63795	4.06e-13	Co_Occurrence	EP300, IKZF1	33/204
PAK7	KMT2D	8.78e-14	3.27348	4.17e-13	Co_Occurrence	KMT2D, PAK7	82/444
TET2	EPHA7	9.11e-14	5.08754	4.32e-13	Co_Occurrence	EPHA7, TET2	43/263
ARID2	PAK7	9.43e-14	4.21661	4.46e-13	Co_Occurrence	ARID2, PAK7	54/320
PIK3C2G	FLT3	9.45e-14	5.48531	4.46e-13	Co_Occurrence	FLT3, PIK3C2G	40/256
BRCA2	KDR	9.51e-14	5.07861	4.48e-13	Co_Occurrence	BRCA2, KDR	43/263
FLT4	KMT2C	1.01e-13	4.58696	4.75e-13	Co_Occurrence	FLT4, KMT2C	49/308
TP63	TERT	1.01e-13	5.91392	4.76e-13	Co_Occurrence	TERT, TP63	37/240
PREX2	FLT3	1.06e-13	5.71547	4.95e-13	Co_Occurrence	FLT3, PREX2	38/241
KMT2D	DOT1L	1.07e-13	4.51716	5e-13	Co_Occurrence	DOT1L, KMT2D	53/386
TERT	PIK3C2G	1.08e-13	5.76134	5.03e-13	Co_Occurrence	PIK3C2G, TERT	38/249
PIK3C2G	FAT1	1.13e-13	3.76469	5.27e-13	Co_Occurrence	FAT1, PIK3C2G	63/364
IKZF1	BRCA2	1.15e-13	6.1627	5.32e-13	Co_Occurrence	BRCA2, IKZF1	35/219
CREBBP	SPEN	1.25e-13	5.24386	5.78e-13	Co_Occurrence	CREBBP, SPEN	41/252
KMT2D	NOTCH2	1.32e-13	4.33143	6.09e-13	Co_Occurrence	KMT2D, NOTCH2	55/390
MDC1	PAK7	1.34e-13	4.78084	6.17e-13	Co_Occurrence	MDC1, PAK7	46/292
FLT4	MDC1	1.39e-13	5.92494	6.4e-13	Co_Occurrence	FLT4, MDC1	36/224
IKZF1	PREX2	1.4e-13	5.65012	6.43e-13	Co_Occurrence	IKZF1, PREX2	38/242
KMT2A	FLT4	1.4e-13	5.122	6.43e-13	Co_Occurrence	FLT4, KMT2A	42/261
ATR	ALK	1.41e-13	5.50921	6.45e-13	Co_Occurrence	ALK, ATR	39/248
GRIN2A	PGR	1.48e-13	4.90527	6.76e-13	Co_Occurrence	GRIN2A, PGR	46/324
NOTCH1	ROS1	1.54e-13	4.30717	7.04e-13	Co_Occurrence	NOTCH1, ROS1	52/323
PIK3C2G	IL7R	1.61e-13	5.51226	7.31e-13	Co_Occurrence	IL7R, PIK3C2G	39/254
APC	ROS1	1.61e-13	3.53866	7.32e-13	Co_Occurrence	APC, ROS1	68/380
NOTCH3	FLT4	1.7e-13	5.08615	7.7e-13	Co_Occurrence	FLT4, NOTCH3	42/262
TERT	NOTCH4	1.78e-13	5.52788	8.05e-13	Co_Occurrence	NOTCH4, TERT	39/261
ARID1A	NOTCH3	1.93e-13	3.83816	8.72e-13	Co_Occurrence	ARID1A, NOTCH3	60/356
NTRK3	NOTCH4	1.96e-13	4.68767	8.85e-13	Co_Occurrence	NOTCH4, NTRK3	46/287
IL7R	KDR	1.98e-13	5.72744	8.92e-13	Co_Occurrence	IL7R, KDR	37/239
MGA	KMT2C	1.99e-13	4.32771	8.94e-13	Co_Occurrence	KMT2C, MGA	51/317
PREX2	EPHA3	2.01e-13	4.57605	8.99e-13	Co_Occurrence	EPHA3, PREX2	47/286
MGA	PTPRD	2.34e-13	3.96488	1.05e-12	Co_Occurrence	MGA, PTPRD	58/368
TERT	ZFHX3	2.34e-13	5.72144	1.05e-12	Co_Occurrence	TERT, ZFHX3	37/245
IKZF1	NF1	2.39e-13	4.40182	1.06e-12	Co_Occurrence	IKZF1, NF1	52/369
PTPRS	ZFHX3	2.49e-13	5.40067	1.11e-12	Co_Occurrence	PTPRS, ZFHX3	39/253
TERT	IL7R	2.55e-13	7.32085	1.13e-12	Co_Occurrence	IL7R, TERT	29/183
BRAF	TP53	2.57e-13	0.417249	1.14e-12	Mutually_Exclusive	BRAF, TP53	103/1187
PGR	KDR	2.77e-13	5.81402	1.23e-12	Co_Occurrence	KDR, PGR	36/236
PTPRT	CDKN2A	2.8e-13	3.02046	1.23e-12	Co_Occurrence	CDKN2A, PTPRT	89/472
EP300	KMT2A	2.93e-13	5.21605	1.29e-12	Co_Occurrence	EP300, KMT2A	40/255
POLE	BRCA2	2.94e-13	5.44681	1.29e-12	Co_Occurrence	BRCA2, POLE	38/239
PAK7	FAT1	3.01e-13	3.47804	1.32e-12	Co_Occurrence	FAT1, PAK7	68/385
TET2	PAK7	3.02e-13	4.46921	1.32e-12	Co_Occurrence	PAK7, TET2	48/302
ZFHX3	SETD2	3.06e-13	4.29388	1.34e-12	Co_Occurrence	SETD2, ZFHX3	50/303
KMT2C	ANKRD11	3.09e-13	4.97745	1.35e-12	Co_Occurrence	ANKRD11, KMT2C	43/293
MDC1	NOTCH1	3.11e-13	5.58064	1.35e-12	Co_Occurrence	MDC1, NOTCH1	37/234
KDR	PIK3CG	3.14e-13	4.85933	1.36e-12	Co_Occurrence	KDR, PIK3CG	43/268
PTPRD	PIK3CG	3.18e-13	3.92581	1.38e-12	Co_Occurrence	PIK3CG, PTPRD	58/369
EPHA7	APC	3.22e-13	4.00655	1.39e-12	Co_Occurrence	APC, EPHA7	55/332
ANKRD11	ZFHX3	3.28e-13	5.48374	1.41e-12	Co_Occurrence	ANKRD11, ZFHX3	38/250
IL7R	ZFHX3	3.28e-13	5.48374	1.41e-12	Co_Occurrence	IL7R, ZFHX3	38/250
PAK7	BRAF	3.38e-13	3.13059	1.45e-12	Co_Occurrence	BRAF, PAK7	83/459
KRAS	NRAS	3.4e-13	0.0685779	1.46e-12	Mutually_Exclusive	KRAS, NRAS	3/561
FLT4	NTRK3	3.49e-13	5.551	1.5e-12	Co_Occurrence	FLT4, NTRK3	37/234
EPHB1	PTPRS	3.57e-13	6.92034	1.53e-12	Co_Occurrence	EPHB1, PTPRS	30/191
CARD11	KMT2B	3.58e-13	5.54947	1.53e-12	Co_Occurrence	CARD11, KMT2B	37/235
FAT1	FLT1	3.63e-13	4.08203	1.55e-12	Co_Occurrence	FAT1, FLT1	54/340
KDR	ALK	3.79e-13	4.47603	1.61e-12	Co_Occurrence	ALK, KDR	47/289
ARID2	KMT2A	3.79e-13	4.47603	1.61e-12	Co_Occurrence	ARID2, KMT2A	47/289
BRCA2	PAK7	3.95e-13	4.42712	1.67e-12	Co_Occurrence	BRCA2, PAK7	48/303
TERT	ERBB4	3.96e-13	5.15632	1.67e-12	Co_Occurrence	ERBB4, TERT	41/285
TP63	CARD11	3.96e-13	4.72569	1.67e-12	Co_Occurrence	CARD11, TP63	44/275
EPHB1	PAK7	4.02e-13	5.12211	1.7e-12	Co_Occurrence	EPHB1, PAK7	41/279
EPHB1	NTRK3	4.08e-13	6.21022	1.72e-12	Co_Occurrence	EPHB1, NTRK3	33/213
SPEN	NOTCH3	4.27e-13	4.71107	1.8e-12	Co_Occurrence	NOTCH3, SPEN	44/275
MET	FLT4	4.37e-13	6.18186	1.83e-12	Co_Occurrence	FLT4, MET	33/212
PREX2	NOTCH3	4.68e-13	4.44359	1.96e-12	Co_Occurrence	NOTCH3, PREX2	47/290
CARD11	HGF	4.76e-13	5.63832	1.99e-12	Co_Occurrence	CARD11, HGF	36/231
NOTCH2	NF1	5e-13	4.28601	2.09e-12	Co_Occurrence	NF1, NOTCH2	52/371
MGA	GRIN2A	5.02e-13	4.00006	2.09e-12	Co_Occurrence	GRIN2A, MGA	55/351
PTPRD	MTOR	5.42e-13	4.53916	2.25e-12	Co_Occurrence	MTOR, PTPRD	48/347
BRCA2	ERBB4	5.61e-13	4.31145	2.33e-12	Co_Occurrence	BRCA2, ERBB4	49/312
KMT2A	ARID1A	5.74e-13	3.7573	2.38e-12	Co_Occurrence	ARID1A, KMT2A	59/357
ATM	ALK	5.76e-13	4.57106	2.38e-12	Co_Occurrence	ALK, ATM	45/281
ALK	EPHA3	5.82e-13	4.4095	2.4e-12	Co_Occurrence	ALK, EPHA3	47/291
BRCA2	EPHA7	5.84e-13	4.84771	2.41e-12	Co_Occurrence	BRCA2, EPHA7	42/266
FLT1	PDGFRA	6.07e-13	5.58066	2.5e-12	Co_Occurrence	FLT1, PDGFRA	36/232
EPHA3	NF1	6.1e-13	3.52439	2.5e-12	Co_Occurrence	EPHA3, NF1	66/403
FLT4	SPEN	6.36e-13	5.28308	2.61e-12	Co_Occurrence	FLT4, SPEN	38/243
EPHB1	KDR	6.5e-13	5.6037	2.66e-12	Co_Occurrence	EPHB1, KDR	36/239
ATR	PTPRD	6.54e-13	4.34114	2.67e-12	Co_Occurrence	ATR, PTPRD	50/352
BRCA2	FLT4	6.61e-13	5.4069	2.69e-12	Co_Occurrence	BRCA2, FLT4	37/237
SPEN	PAK7	7.16e-13	4.26096	2.91e-12	Co_Occurrence	PAK7, SPEN	49/309
EPHA3	NOTCH3	7.17e-13	4.37755	2.91e-12	Co_Occurrence	EPHA3, NOTCH3	47/292
NF1	ANKRD11	7.27e-13	4.38106	2.95e-12	Co_Occurrence	ANKRD11, NF1	50/368
TP63	KMT2C	7.54e-13	3.84884	3.05e-12	Co_Occurrence	KMT2C, TP63	56/340
TERT	IKZF1	7.67e-13	6.93685	3.1e-12	Co_Occurrence	IKZF1, TERT	29/188
ATR	KMT2A	7.71e-13	5.27533	3.1e-12	Co_Occurrence	ATR, KMT2A	38/250
EPHB1	EPHA7	7.71e-13	5.56472	3.1e-12	Co_Occurrence	EPHA7, EPHB1	36/240
FLT3	KMT2D	7.72e-13	4.20518	3.11e-12	Co_Occurrence	FLT3, KMT2D	53/391
ANKRD11	PTPRD	7.78e-13	4.47719	3.12e-12	Co_Occurrence	ANKRD11, PTPRD	48/348
ATR	CREBBP	8e-13	5.67498	3.21e-12	Co_Occurrence	ATR, CREBBP	35/228
MDC1	ALK	8.15e-13	5.00801	3.26e-12	Co_Occurrence	ALK, MDC1	40/259
FLT3	ROS1	8.28e-13	4.70452	3.31e-12	Co_Occurrence	FLT3, ROS1	44/304
PIK3CG	ALK	8.38e-13	4.68648	3.34e-12	Co_Occurrence	ALK, PIK3CG	43/273
POLE	NTRK3	8.45e-13	5.35173	3.36e-12	Co_Occurrence	NTRK3, POLE	37/238
NF1	SETD2	8.87e-13	3.42274	3.52e-12	Co_Occurrence	NF1, SETD2	68/409
SPEN	PDGFRA	8.97e-13	5.48943	3.56e-12	Co_Occurrence	PDGFRA, SPEN	36/234
TERT	KDR	9.14e-13	5.68753	3.62e-12	Co_Occurrence	KDR, TERT	35/236
POLE	PTPRD	9.33e-13	3.95273	3.69e-12	Co_Occurrence	POLE, PTPRD	55/365
NOTCH2	PTPRT	9.89e-13	4.07198	3.9e-12	Co_Occurrence	NOTCH2, PTPRT	55/407
PIK3CG	NOTCH3	1.02e-12	4.65337	4e-12	Co_Occurrence	NOTCH3, PIK3CG	43/274
PTPRS	PTPRD	1.02e-12	4.34909	4e-12	Co_Occurrence	PTPRD, PTPRS	49/351
GRIN2A	IKZF1	1.04e-12	4.45956	4.08e-12	Co_Occurrence	GRIN2A, IKZF1	47/332
PREX2	KMT2D	1.07e-12	3.42545	4.19e-12	Co_Occurrence	KMT2D, PREX2	68/422
PAK7	KMT2C	1.08e-12	3.53056	4.21e-12	Co_Occurrence	KMT2C, PAK7	63/368
ZFHX3	ARID1A	1.13e-12	3.63585	4.4e-12	Co_Occurrence	ARID1A, ZFHX3	60/363
KMT2C	BRCA2	1.26e-12	4.19627	4.91e-12	Co_Occurrence	BRCA2, KMT2C	49/317
PTPRT	NRAS	1.27e-12	3.02494	4.96e-12	Co_Occurrence	NRAS, PTPRT	83/464
IKZF1	MDC1	1.29e-12	6.07502	5.02e-12	Co_Occurrence	IKZF1, MDC1	32/210
KMT2D	BRCA2	1.3e-12	3.71411	5.02e-12	Co_Occurrence	BRCA2, KMT2D	61/407
POLE	ROS1	1.32e-12	4.2017	5.12e-12	Co_Occurrence	POLE, ROS1	49/321
KMT2D	MDC1	1.33e-12	3.87705	5.13e-12	Co_Occurrence	KMT2D, MDC1	57/400
MET	CARD11	1.33e-12	5.71719	5.14e-12	Co_Occurrence	CARD11, MET	34/225
IL7R	EPHA7	1.34e-12	5.43321	5.14e-12	Co_Occurrence	EPHA7, IL7R	36/242
KMT2C	FAT1	1.37e-12	3.31529	5.27e-12	Co_Occurrence	FAT1, KMT2C	70/397
EPHA7	HGF	1.4e-12	5.13743	5.39e-12	Co_Occurrence	EPHA7, HGF	38/251
FLT4	ATR	1.45e-12	5.85598	5.55e-12	Co_Occurrence	ATR, FLT4	33/217
PIK3C2G	ARID2	1.46e-12	4.20237	5.59e-12	Co_Occurrence	ARID2, PIK3C2G	48/301
KMT2D	CDKN2A	1.47e-12	2.97108	5.63e-12	Co_Occurrence	CDKN2A, KMT2D	85/463
CREBBP	ROS1	1.48e-12	4.05029	5.66e-12	Co_Occurrence	CREBBP, ROS1	51/328
KMT2C	IL7R	1.53e-12	4.77768	5.82e-12	Co_Occurrence	IL7R, KMT2C	42/295
MDC1	EPHB1	1.54e-12	6.23583	5.86e-12	Co_Occurrence	EPHB1, MDC1	31/205
PIK3C2G	PDGFRA	1.54e-12	4.90198	5.86e-12	Co_Occurrence	PDGFRA, PIK3C2G	40/266
ATM	ARID1A	1.56e-12	3.83301	5.9e-12	Co_Occurrence	ARID1A, ATM	55/348
SPEN	GRIN2A	1.57e-12	3.85063	5.95e-12	Co_Occurrence	GRIN2A, SPEN	55/355
MGA	ERBB4	1.61e-12	4.15323	6.09e-12	Co_Occurrence	ERBB4, MGA	49/316
ATR	PAK7	1.67e-12	4.72546	6.28e-12	Co_Occurrence	ATR, PAK7	42/287
MDC1	KMT2C	1.69e-12	4.37984	6.35e-12	Co_Occurrence	KMT2C, MDC1	46/308
EP300	NOTCH3	1.81e-12	4.96641	6.8e-12	Co_Occurrence	EP300, NOTCH3	39/258
EPHB1	PIK3CG	1.84e-12	5.81196	6.91e-12	Co_Occurrence	EPHB1, PIK3CG	33/221
PGR	EPHA7	1.89e-12	5.50871	7.08e-12	Co_Occurrence	EPHA7, PGR	35/239
KDR	FLT1	1.9e-12	4.63316	7.09e-12	Co_Occurrence	FLT1, KDR	42/271
PREX2	FLT1	1.9e-12	4.63316	7.09e-12	Co_Occurrence	FLT1, PREX2	42/271
PIK3C2G	MGA	1.95e-12	4.46243	7.26e-12	Co_Occurrence	MGA, PIK3C2G	44/284
CDKN2A	PREX2	2.03e-12	3.78345	7.56e-12	Co_Occurrence	CDKN2A, PREX2	55/343
MET	PIK3C2G	2.04e-12	5.09055	7.6e-12	Co_Occurrence	MET, PIK3C2G	38/259
ATRX	NF1	2.15e-12	3.45857	7.99e-12	Co_Occurrence	ATRX, NF1	65/404
NF1	MET	2.18e-12	4.20395	8.08e-12	Co_Occurrence	MET, NF1	50/371
EPHB1	PTPRT	2.19e-12	4.1556	8.08e-12	Co_Occurrence	EPHB1, PTPRT	52/404
FLT1	PTPRS	2.19e-12	5.59218	8.08e-12	Co_Occurrence	FLT1, PTPRS	34/227
NOTCH1	ZFHX3	2.37e-12	4.51157	8.72e-12	Co_Occurrence	NOTCH1, ZFHX3	43/279
KMT2C	SPEN	2.43e-12	4.03332	8.96e-12	Co_Occurrence	KMT2C, SPEN	50/323
ARID1B	CARD11	2.48e-12	5.25468	9.11e-12	Co_Occurrence	ARID1B, CARD11	36/238
FLT4	SETD2	2.53e-12	4.68883	9.29e-12	Co_Occurrence	FLT4, SETD2	41/270
KMT2A	EPHA3	2.56e-12	4.255	9.38e-12	Co_Occurrence	EPHA3, KMT2A	46/293
ARID1B	ZFHX3	2.6e-12	4.79037	9.52e-12	Co_Occurrence	ARID1B, ZFHX3	40/266
PIK3CG	SPEN	2.65e-12	4.86989	9.66e-12	Co_Occurrence	PIK3CG, SPEN	39/255
IL7R	FAT1	2.65e-12	4.53413	9.68e-12	Co_Occurrence	FAT1, IL7R	44/318
ATR	GRIN2A	2.78e-12	4.29575	1.01e-11	Co_Occurrence	ATR, GRIN2A	47/335
ZFHX3	PDGFRA	2.81e-12	4.88834	1.02e-11	Co_Occurrence	PDGFRA, ZFHX3	39/262
FAT1	IKZF1	2.9e-12	4.4261	1.05e-11	Co_Occurrence	FAT1, IKZF1	45/321
ROS1	ZFHX3	3.1e-12	3.63791	1.13e-11	Co_Occurrence	ROS1, ZFHX3	57/352
NOTCH2	ALK	3.12e-12	5.10325	1.13e-11	Co_Occurrence	ALK, NOTCH2	37/251
HGF	GRIN2A	3.13e-12	4.19827	1.13e-11	Co_Occurrence	GRIN2A, HGF	48/338
ARID2	EPHA7	3.3e-12	4.28883	1.19e-11	Co_Occurrence	ARID2, EPHA7	45/289
TET2	IKZF1	3.39e-12	5.64244	1.22e-11	Co_Occurrence	IKZF1, TET2	33/222
EPHA7	FAT1	3.49e-12	3.63746	1.25e-11	Co_Occurrence	EPHA7, FAT1	57/358
MET	NOTCH4	3.56e-12	4.87666	1.28e-11	Co_Occurrence	MET, NOTCH4	39/271
TP63	CDKN2A	3.61e-12	3.6654	1.29e-11	Co_Occurrence	CDKN2A, TP63	56/349
PDGFRA	ALK	3.62e-12	4.94436	1.3e-11	Co_Occurrence	ALK, PDGFRA	38/256
EPHA7	EP300	3.79e-12	4.92935	1.36e-11	Co_Occurrence	EP300, EPHA7	38/255
KMT2D	TERT	3.8e-12	4.25012	1.36e-11	Co_Occurrence	KMT2D, TERT	49/388
ROS1	MTOR	3.84e-12	4.62214	1.37e-11	Co_Occurrence	MTOR, ROS1	42/303
ERBB4	ARID1A	3.88e-12	3.26539	1.38e-11	Co_Occurrence	ARID1A, ERBB4	68/395
EPHA3	KDR	4.03e-12	4.25736	1.43e-11	Co_Occurrence	EPHA3, KDR	45/290
TET2	KMT2C	4.07e-12	4.09092	1.44e-11	Co_Occurrence	KMT2C, TET2	48/318
PGR	PAK7	4.1e-12	4.88651	1.45e-11	Co_Occurrence	PAK7, PGR	39/280
APC	NOTCH3	4.14e-12	3.73607	1.46e-11	Co_Occurrence	APC, NOTCH3	54/339
IKZF1	FLT4	4.27e-12	5.75255	1.51e-11	Co_Occurrence	FLT4, IKZF1	32/216
EPHA7	POLE	4.3e-12	4.68115	1.52e-11	Co_Occurrence	EPHA7, POLE	40/265
PIK3C2G	ANKRD11	4.61e-12	5.04519	1.62e-11	Co_Occurrence	ANKRD11, PIK3C2G	37/258
ROS1	ARID1B	4.79e-12	4.22491	1.68e-11	Co_Occurrence	ARID1B, ROS1	46/316
FLT1	KMT2A	4.88e-12	4.46982	1.71e-11	Co_Occurrence	FLT1, KMT2A	42/276
EPHB1	FLT4	4.92e-12	5.90748	1.72e-11	Co_Occurrence	EPHB1, FLT4	31/211
EPHA7	IKZF1	4.98e-12	5.12891	1.74e-11	Co_Occurrence	EPHA7, IKZF1	36/247
EPHA7	KMT2D	5.58e-12	3.30568	1.95e-11	Co_Occurrence	EPHA7, KMT2D	67/425
NTRK3	KMT2D	5.59e-12	3.60757	1.95e-11	Co_Occurrence	KMT2D, NTRK3	59/408
NOTCH3	TET2	5.63e-12	4.53689	1.96e-11	Co_Occurrence	NOTCH3, TET2	41/272
EPHB1	IL7R	5.63e-12	6.52953	1.96e-11	Co_Occurrence	EPHB1, IL7R	28/190
KDR	MGA	5.69e-12	4.53117	1.97e-11	Co_Occurrence	KDR, MGA	41/271
NOTCH3	CREBBP	5.87e-12	4.43844	2.03e-11	Co_Occurrence	CREBBP, NOTCH3	42/277
NOTCH1	GRIN2A	5.9e-12	3.78656	2.04e-11	Co_Occurrence	GRIN2A, NOTCH1	53/354
NOTCH2	PAK7	5.92e-12	4.58981	2.05e-11	Co_Occurrence	NOTCH2, PAK7	41/288
CARD11	KMT2C	5.96e-12	3.96921	2.06e-11	Co_Occurrence	CARD11, KMT2C	49/323
EPHA7	TERT	6.05e-12	5.38391	2.08e-11	Co_Occurrence	EPHA7, TERT	34/239
PIK3CG	PAK7	6.08e-12	4.08106	2.09e-11	Co_Occurrence	PAK7, PIK3CG	47/310
PTPRS	ARID1B	6.41e-12	5.82543	2.2e-11	Co_Occurrence	ARID1B, PTPRS	31/211
ARID1B	KDR	6.54e-12	4.81625	2.24e-11	Co_Occurrence	ARID1B, KDR	38/257
KMT2C	KDR	6.56e-12	3.73029	2.25e-11	Co_Occurrence	KDR, KMT2C	53/338
CREBBP	EP300	6.67e-12	5.17058	2.28e-11	Co_Occurrence	CREBBP, EP300	35/237
ERBB4	APC	6.88e-12	3.36129	2.35e-11	Co_Occurrence	APC, ERBB4	63/376
MGA	CARD11	7.04e-12	4.78669	2.4e-11	Co_Occurrence	CARD11, MGA	38/254
PIK3CG	PREX2	7.07e-12	4.49244	2.41e-11	Co_Occurrence	PIK3CG, PREX2	41/272
PTPRS	NOTCH1	7.1e-12	5.45773	2.41e-11	Co_Occurrence	NOTCH1, PTPRS	33/226
EPHA3	NOTCH4	7.55e-12	3.91017	2.56e-11	Co_Occurrence	EPHA3, NOTCH4	49/315
MET	FLT1	7.57e-12	5.44565	2.57e-11	Co_Occurrence	FLT1, MET	33/227
CDKN2A	FAT1	7.66e-12	3.14667	2.59e-11	Co_Occurrence	CDKN2A, FAT1	70/406
POLE	ZFHX3	7.77e-12	4.48529	2.62e-11	Co_Occurrence	POLE, ZFHX3	41/275
FLT4	MGA	7.83e-12	5.00071	2.64e-11	Co_Occurrence	FLT4, MGA	36/243
TP63	FAT1	7.85e-12	3.54601	2.64e-11	Co_Occurrence	FAT1, TP63	58/363
FLT1	NOTCH4	8.15e-12	4.16265	2.74e-11	Co_Occurrence	FLT1, NOTCH4	45/298
NOTCH2	KMT2B	8.17e-12	5.75722	2.75e-11	Co_Occurrence	KMT2B, NOTCH2	31/212
EPHA3	HGF	8.5e-12	4.88355	2.85e-11	Co_Occurrence	EPHA3, HGF	37/254
BRCA2	NOTCH4	8.5e-12	4.23228	2.85e-11	Co_Occurrence	BRCA2, NOTCH4	44/294
NOTCH2	PTPRD	8.53e-12	4.0852	2.85e-11	Co_Occurrence	NOTCH2, PTPRD	48/355
CARD11	ARID2	8.76e-12	4.45433	2.93e-11	Co_Occurrence	ARID2, CARD11	41/273
PGR	PREX2	8.82e-12	5.28914	2.94e-11	Co_Occurrence	PGR, PREX2	34/240
ROS1	EP300	8.84e-12	4.2042	2.94e-11	Co_Occurrence	EP300, ROS1	45/315
ARID1A	NOTCH1	8.84e-12	3.82405	2.94e-11	Co_Occurrence	ARID1A, NOTCH1	51/342
PAK7	PDGFRA	8.93e-12	4.41719	2.97e-11	Co_Occurrence	PAK7, PDGFRA	42/293
KMT2C	ZFHX3	8.96e-12	3.59603	2.97e-11	Co_Occurrence	KMT2C, ZFHX3	55/347
FLT4	TERT	8.96e-12	5.94164	2.97e-11	Co_Occurrence	FLT4, TERT	30/208
MDC1	PIK3C2G	9.11e-12	4.55972	3.01e-11	Co_Occurrence	MDC1, PIK3C2G	40/273
EPHB1	GRIN2A	9.19e-12	4.34602	3.04e-11	Co_Occurrence	EPHB1, GRIN2A	44/331
MGA	PTPRT	9.47e-12	3.4457	3.12e-11	Co_Occurrence	MGA, PTPRT	62/426
EPHA7	CDKN2A	9.69e-12	3.63903	3.19e-11	Co_Occurrence	CDKN2A, EPHA7	54/346
EPHA3	PIK3CG	1.02e-11	4.42822	3.36e-11	Co_Occurrence	EPHA3, PIK3CG	41/274
NOTCH2	NOTCH4	1.07e-11	4.65564	3.51e-11	Co_Occurrence	NOTCH2, NOTCH4	39/275
FLT4	EP300	1.07e-11	5.34468	3.52e-11	Co_Occurrence	EP300, FLT4	33/226
TERT	PAK7	1.1e-11	4.79998	3.62e-11	Co_Occurrence	PAK7, TERT	38/280
KMT2B	TERT	1.26e-11	6.04699	4.11e-11	Co_Occurrence	KMT2B, TERT	29/202
MTOR	GRIN2A	1.27e-11	4.28888	4.15e-11	Co_Occurrence	GRIN2A, MTOR	44/332
NF1	APC	1.29e-11	2.97599	4.19e-11	Co_Occurrence	APC, NF1	77/442
MTOR	POLE	1.3e-11	5.64157	4.24e-11	Co_Occurrence	MTOR, POLE	31/216
PTPRT	DOT1L	1.32e-11	3.94652	4.28e-11	Co_Occurrence	DOT1L, PTPRT	51/407
KMT2A	FAT1	1.32e-11	3.52374	4.28e-11	Co_Occurrence	FAT1, KMT2A	57/362
NOTCH1	NOTCH3	1.37e-11	4.37962	4.43e-11	Co_Occurrence	NOTCH1, NOTCH3	41/276
MGA	ALK	1.42e-11	4.37241	4.59e-11	Co_Occurrence	ALK, MGA	41/276
KMT2B	TET2	1.45e-11	5.12904	4.67e-11	Co_Occurrence	KMT2B, TET2	34/234
PDGFRA	PIK3CG	1.49e-11	5.12697	4.8e-11	Co_Occurrence	PDGFRA, PIK3CG	34/235
MET	EPHA7	1.55e-11	5.01047	5e-11	Co_Occurrence	EPHA7, MET	35/247
TP63	PTPRS	1.55e-11	4.88946	5e-11	Co_Occurrence	PTPRS, TP63	36/254
FLT1	SPEN	1.57e-11	4.63066	5.04e-11	Co_Occurrence	FLT1, SPEN	38/258
KMT2D	NOTCH1	1.57e-11	3.49257	5.04e-11	Co_Occurrence	KMT2D, NOTCH1	60/412
NOTCH4	KMT2C	1.57e-11	3.42099	5.04e-11	Co_Occurrence	KMT2C, NOTCH4	58/361
PTPRS	ERBB4	1.58e-11	4.42728	5.07e-11	Co_Occurrence	ERBB4, PTPRS	41/297
DOT1L	CARD11	1.61e-11	5.42195	5.13e-11	Co_Occurrence	CARD11, DOT1L	32/225
MTOR	CARD11	1.61e-11	5.42195	5.13e-11	Co_Occurrence	CARD11, MTOR	32/225
PDGFRA	ROS1	1.63e-11	4.18344	5.18e-11	Co_Occurrence	PDGFRA, ROS1	44/314
NOTCH3	HGF	1.65e-11	4.75072	5.26e-11	Co_Occurrence	HGF, NOTCH3	37/258
APC	MTOR	1.67e-11	4.52138	5.31e-11	Co_Occurrence	APC, MTOR	40/295
PAK7	ANKRD11	1.78e-11	4.58796	5.64e-11	Co_Occurrence	ANKRD11, PAK7	39/285
FLT3	BRCA2	1.81e-11	5.38303	5.74e-11	Co_Occurrence	BRCA2, FLT3	32/224
MDC1	TERT	1.82e-11	5.93722	5.76e-11	Co_Occurrence	MDC1, TERT	29/204
KMT2C	TERT	1.91e-11	4.60858	6.04e-11	Co_Occurrence	KMT2C, TERT	39/294
CREBBP	ATM	1.92e-11	4.49466	6.05e-11	Co_Occurrence	ATM, CREBBP	39/265
MDC1	KMT2A	1.94e-11	4.60492	6.13e-11	Co_Occurrence	KMT2A, MDC1	38/263
FLT3	FLT4	1.95e-11	5.52693	6.16e-11	Co_Occurrence	FLT3, FLT4	31/217
FLT3	EPHA7	1.99e-11	4.95522	6.25e-11	Co_Occurrence	EPHA7, FLT3	35/248
KMT2C	KMT2A	2.03e-11	3.58813	6.39e-11	Co_Occurrence	KMT2A, KMT2C	53/343
PIK3C2G	ZFHX3	2.1e-11	3.82285	6.6e-11	Co_Occurrence	PIK3C2G, ZFHX3	48/314
TET2	KMT2A	2.14e-11	4.38921	6.71e-11	Co_Occurrence	KMT2A, TET2	40/273
FAT1	CARD11	2.23e-11	3.70067	6.97e-11	Co_Occurrence	CARD11, FAT1	51/346
FLT1	KMT2C	2.36e-11	3.83486	7.38e-11	Co_Occurrence	FLT1, KMT2C	48/325
ROS1	ANKRD11	2.38e-11	4.3795	7.43e-11	Co_Occurrence	ANKRD11, ROS1	41/306
KMT2C	PREX2	2.44e-11	3.6128	7.62e-11	Co_Occurrence	KMT2C, PREX2	52/340
KMT2B	FLT3	2.48e-11	5.64043	7.7e-11	Co_Occurrence	FLT3, KMT2B	30/211
TP63	PDGFRA	2.9e-11	4.63817	9.01e-11	Co_Occurrence	PDGFRA, TP63	37/261
PTPRT	PTPRS	2.96e-11	3.76389	9.2e-11	Co_Occurrence	PTPRS, PTPRT	52/411
PIK3CG	TP63	2.99e-11	4.24544	9.26e-11	Co_Occurrence	PIK3CG, TP63	41/280
IL7R	ARID2	3.18e-11	4.98257	9.83e-11	Co_Occurrence	ARID2, IL7R	34/245
IL7R	PREX2	3.18e-11	4.98257	9.83e-11	Co_Occurrence	IL7R, PREX2	34/245
KMT2C	ARID1A	3.22e-11	3.09055	9.95e-11	Co_Occurrence	ARID1A, KMT2C	67/402
KDR	NOTCH2	3.51e-11	4.82628	1.08e-10	Co_Occurrence	KDR, NOTCH2	35/250
NOTCH2	GRIN2A	3.63e-11	4.03113	1.12e-10	Co_Occurrence	GRIN2A, NOTCH2	45/338
ERBB4	ATR	3.65e-11	4.27507	1.12e-10	Co_Occurrence	ATR, ERBB4	41/300
EPHA3	NTRK3	3.68e-11	4.38122	1.13e-10	Co_Occurrence	EPHA3, NTRK3	39/270
EP300	PTPRT	3.82e-11	3.57947	1.17e-10	Co_Occurrence	EP300, PTPRT	55/417
MTOR	NF1	3.85e-11	3.96562	1.18e-10	Co_Occurrence	MTOR, NF1	47/373
PREX2	MDC1	3.93e-11	4.56815	1.2e-10	Co_Occurrence	MDC1, PREX2	37/260
PIK3CG	CARD11	4.08e-11	4.5483	1.25e-10	Co_Occurrence	CARD11, PIK3CG	37/257
KMT2A	EPHB1	4.16e-11	4.92992	1.27e-10	Co_Occurrence	EPHB1, KMT2A	34/248
CREBBP	NF1	4.21e-11	3.41028	1.28e-10	Co_Occurrence	CREBBP, NF1	57/396
IL7R	EPHA3	4.34e-11	4.91488	1.32e-10	Co_Occurrence	EPHA3, IL7R	34/247
KDR	FAT1	4.36e-11	3.45108	1.32e-10	Co_Occurrence	FAT1, KDR	55/361
PDGFRA	EPHA7	4.43e-11	4.65635	1.34e-10	Co_Occurrence	EPHA7, PDGFRA	36/256
KDR	ATR	4.46e-11	4.77424	1.35e-10	Co_Occurrence	ATR, KDR	35/251
KMT2C	EP300	4.49e-11	4.07992	1.36e-10	Co_Occurrence	EP300, KMT2C	43/310
KMT2A	APC	4.52e-11	3.53433	1.36e-10	Co_Occurrence	APC, KMT2A	52/342
MDC1	EPHA7	4.64e-11	4.5361	1.4e-10	Co_Occurrence	EPHA7, MDC1	37/261
IKZF1	KMT2A	4.77e-11	4.76703	1.44e-10	Co_Occurrence	IKZF1, KMT2A	35/253
CREBBP	GRIN2A	4.89e-11	3.56272	1.47e-10	Co_Occurrence	CREBBP, GRIN2A	52/359
SPEN	MGA	4.92e-11	4.51195	1.48e-10	Co_Occurrence	MGA, SPEN	37/258
FLT1	CARD11	4.94e-11	4.51087	1.48e-10	Co_Occurrence	CARD11, FLT1	37/258
PGR	PTPRD	4.98e-11	4.10111	1.49e-10	Co_Occurrence	PGR, PTPRD	44/351
HGF	NOTCH4	5.03e-11	4.35794	1.51e-10	Co_Occurrence	HGF, NOTCH4	39/281
FLT3	CARD11	5.14e-11	5.12783	1.54e-10	Co_Occurrence	CARD11, FLT3	32/230
PTPRT	MTOR	5.17e-11	3.80282	1.54e-10	Co_Occurrence	MTOR, PTPRT	50/409
KMT2A	MTOR	5.35e-11	4.87221	1.6e-10	Co_Occurrence	KMT2A, MTOR	34/249
NOTCH2	KMT2C	5.42e-11	4.21318	1.62e-10	Co_Occurrence	KMT2C, NOTCH2	41/304
IKZF1	FLT3	5.52e-11	5.80499	1.64e-10	Co_Occurrence	FLT3, IKZF1	28/201
SPEN	TP63	5.6e-11	4.1391	1.66e-10	Co_Occurrence	SPEN, TP63	41/283
KMT2B	ALK	5.7e-11	4.49955	1.69e-10	Co_Occurrence	ALK, KMT2B	37/263
EPHB1	ROS1	5.84e-11	4.30775	1.73e-10	Co_Occurrence	EPHB1, ROS1	40/306
TET2	CREBBP	5.88e-11	4.58103	1.74e-10	Co_Occurrence	CREBBP, TET2	36/253
FLT3	TP63	5.93e-11	4.72448	1.75e-10	Co_Occurrence	FLT3, TP63	35/255
ATR	EPHA3	6.12e-11	4.7085	1.81e-10	Co_Occurrence	ATR, EPHA3	35/253
POLE	ARID1A	6.14e-11	3.72854	1.81e-10	Co_Occurrence	ARID1A, POLE	48/340
KMT2A	NTRK3	6.15e-11	4.29015	1.81e-10	Co_Occurrence	KMT2A, NTRK3	39/273
PIK3CG	KMT2D	6.17e-11	3.32113	1.81e-10	Co_Occurrence	KMT2D, PIK3CG	59/416
MGA	KMT2A	6.19e-11	4.20201	1.82e-10	Co_Occurrence	KMT2A, MGA	40/278
NOTCH3	MTOR	6.22e-11	4.83961	1.82e-10	Co_Occurrence	MTOR, NOTCH3	34/250
NF1	NOTCH1	6.3e-11	3.40486	1.85e-10	Co_Occurrence	NF1, NOTCH1	56/395
FLT1	IKZF1	6.44e-11	5.07291	1.88e-10	Co_Occurrence	FLT1, IKZF1	32/231
TP63	EPHB1	6.52e-11	4.8322	1.91e-10	Co_Occurrence	EPHB1, TP63	34/251
NSD1	KMT2D	6.54e-11	3.93154	1.91e-10	Co_Occurrence	KMT2D, NSD1	47/392
IL7R	KMT2A	6.85e-11	4.81578	2e-10	Co_Occurrence	IL7R, KMT2A	34/250
IKZF1	ERBB4	6.99e-11	4.24853	2.03e-10	Co_Occurrence	ERBB4, IKZF1	40/299
ROS1	ARID1A	6.99e-11	3.00979	2.03e-10	Co_Occurrence	ARID1A, ROS1	68/409
ALK	ARID1B	7.14e-11	4.45535	2.07e-10	Co_Occurrence	ALK, ARID1B	37/264
BRCA2	FLT1	7.15e-11	4.54191	2.08e-10	Co_Occurrence	BRCA2, FLT1	36/254
FLT3	SPEN	7.2e-11	5.04696	2.09e-10	Co_Occurrence	FLT3, SPEN	32/232
POLE	NOTCH1	7.21e-11	4.65001	2.09e-10	Co_Occurrence	NOTCH1, POLE	35/248
NOTCH3	MGA	7.35e-11	4.17287	2.12e-10	Co_Occurrence	MGA, NOTCH3	40/279
NF1	ARID1A	7.61e-11	2.74262	2.2e-10	Co_Occurrence	ARID1A, NF1	81/463
ARID1A	FLT4	8.25e-11	3.74589	2.38e-10	Co_Occurrence	ARID1A, FLT4	47/338
EPHA3	EPHA7	8.47e-11	3.92579	2.44e-10	Co_Occurrence	EPHA3, EPHA7	43/295
DOT1L	PIK3C2G	8.62e-11	4.66178	2.48e-10	Co_Occurrence	DOT1L, PIK3C2G	35/261
IL7R	MDC1	8.62e-11	5.48214	2.48e-10	Co_Occurrence	IL7R, MDC1	29/211
CARD11	ZFHX3	8.67e-11	4.06874	2.49e-10	Co_Occurrence	CARD11, ZFHX3	41/286
FLT1	ZFHX3	8.67e-11	4.06874	2.49e-10	Co_Occurrence	FLT1, ZFHX3	41/286
NOTCH2	NOTCH3	8.98e-11	4.63188	2.57e-10	Co_Occurrence	NOTCH2, NOTCH3	35/256
CARD11	PDGFRA	9.02e-11	4.85021	2.58e-10	Co_Occurrence	CARD11, PDGFRA	33/238
IKZF1	APC	9.08e-11	4.20428	2.59e-10	Co_Occurrence	APC, IKZF1	40/301
NOTCH1	KDR	9.12e-11	4.21664	2.6e-10	Co_Occurrence	KDR, NOTCH1	39/274
TP63	KMT2B	9.21e-11	4.40877	2.62e-10	Co_Occurrence	KMT2B, TP63	37/266
BRAF	KRAS	9.29e-11	0.246098	2.64e-10	Mutually_Exclusive	BRAF, KRAS	17/675
ERBB4	EP300	9.34e-11	4.02886	2.65e-10	Co_Occurrence	EP300, ERBB4	42/307
ARID1B	KMT2C	9.76e-11	3.9529	2.77e-10	Co_Occurrence	ARID1B, KMT2C	43/313
KMT2A	PGR	9.77e-11	4.8706	2.77e-10	Co_Occurrence	KMT2A, PGR	33/247
FLT3	NOTCH4	1.04e-10	4.41962	2.94e-10	Co_Occurrence	FLT3, NOTCH4	37/276
MDC1	NOTCH3	1.05e-10	4.38193	2.96e-10	Co_Occurrence	MDC1, NOTCH3	37/266
PGR	ROS1	1.07e-10	4.29028	3.01e-10	Co_Occurrence	PGR, ROS1	39/305
GRIN2A	CDKN2A	1.12e-10	2.91502	3.15e-10	Co_Occurrence	CDKN2A, GRIN2A	70/421
IL7R	HGF	1.13e-10	5.59266	3.19e-10	Co_Occurrence	HGF, IL7R	28/205
PTPRD	ARID1B	1.15e-10	3.63389	3.23e-10	Co_Occurrence	ARID1B, PTPRD	49/366
FLT1	TERT	1.15e-10	5.24917	3.23e-10	Co_Occurrence	FLT1, TERT	30/223
FAT1	ALK	1.15e-10	3.3179	3.23e-10	Co_Occurrence	ALK, FAT1	55/366
KMT2B	ARID1B	1.16e-10	5.06382	3.26e-10	Co_Occurrence	ARID1B, KMT2B	31/225
SPEN	ARID1A	1.17e-10	3.53208	3.28e-10	Co_Occurrence	ARID1A, SPEN	50/349
ERBB4	FAT1	1.18e-10	3.00806	3.31e-10	Co_Occurrence	ERBB4, FAT1	65/402
MGA	EP300	1.19e-10	4.7849	3.33e-10	Co_Occurrence	EP300, MGA	33/239
TET2	ERBB4	1.23e-10	3.77503	3.43e-10	Co_Occurrence	ERBB4, TET2	45/319
POLE	FLT1	1.25e-10	4.53699	3.48e-10	Co_Occurrence	FLT1, POLE	35/251
MET	FAT1	1.25e-10	4.02985	3.49e-10	Co_Occurrence	FAT1, MET	42/325
NOTCH1	CREBBP	1.27e-10	4.42822	3.53e-10	Co_Occurrence	CREBBP, NOTCH1	36/257
HGF	FAT1	1.29e-10	3.87534	3.58e-10	Co_Occurrence	FAT1, HGF	44/331
MTOR	NOTCH4	1.3e-10	4.4825	3.61e-10	Co_Occurrence	MTOR, NOTCH4	36/273
SETD2	EPHA7	1.32e-10	3.79572	3.66e-10	Co_Occurrence	EPHA7, SETD2	44/303
MDC1	BRCA2	1.32e-10	4.75942	3.66e-10	Co_Occurrence	BRCA2, MDC1	33/239
EP300	NOTCH4	1.33e-10	4.17894	3.68e-10	Co_Occurrence	EP300, NOTCH4	39/285
ARID2	KMT2D	1.34e-10	3.07338	3.7e-10	Co_Occurrence	ARID2, KMT2D	64/430
IL7R	PDGFRA	1.36e-10	5.53924	3.76e-10	Co_Occurrence	IL7R, PDGFRA	28/206
EPHA3	PAK7	1.37e-10	3.5293	3.77e-10	Co_Occurrence	EPHA3, PAK7	49/332
ALK	SPEN	1.4e-10	4.06279	3.84e-10	Co_Occurrence	ALK, SPEN	40/282
EP300	PIK3CG	1.42e-10	4.74722	3.9e-10	Co_Occurrence	EP300, PIK3CG	33/240
MDC1	TP63	1.44e-10	4.32296	3.94e-10	Co_Occurrence	MDC1, TP63	37/268
ARID1B	ARID2	1.44e-10	4.41582	3.94e-10	Co_Occurrence	ARID1B, ARID2	36/261
FLT4	ARID2	1.44e-10	4.31524	3.94e-10	Co_Occurrence	ARID2, FLT4	37/266
FLT4	PREX2	1.44e-10	4.31524	3.94e-10	Co_Occurrence	FLT4, PREX2	37/266
CDKN2A	PIK3C2G	1.45e-10	3.28136	3.96e-10	Co_Occurrence	CDKN2A, PIK3C2G	55/362
PIK3C2G	PGR	1.48e-10	4.66834	4.03e-10	Co_Occurrence	PGR, PIK3C2G	34/259
ATM	ATR	1.54e-10	4.73988	4.19e-10	Co_Occurrence	ATM, ATR	33/243
HGF	KMT2B	1.57e-10	5.14406	4.26e-10	Co_Occurrence	HGF, KMT2B	30/220
TERT	SPEN	1.58e-10	5.16827	4.28e-10	Co_Occurrence	SPEN, TERT	30/225
ATM	PTPRD	1.62e-10	3.30222	4.39e-10	Co_Occurrence	ATM, PTPRD	56/385
ATM	KMT2D	1.63e-10	3.14114	4.41e-10	Co_Occurrence	ATM, KMT2D	61/424
CREBBP	ERBB4	1.64e-10	3.67201	4.44e-10	Co_Occurrence	CREBBP, ERBB4	46/324
KMT2B	FAT1	1.67e-10	3.76754	4.52e-10	Co_Occurrence	FAT1, KMT2B	45/335
ZFHX3	MTOR	1.73e-10	4.62234	4.68e-10	Co_Occurrence	MTOR, ZFHX3	34/257
TET2	PREX2	1.73e-10	4.18877	4.68e-10	Co_Occurrence	PREX2, TET2	38/272
KDR	PDGFRA	1.76e-10	4.48325	4.74e-10	Co_Occurrence	KDR, PDGFRA	35/257
PDGFRA	ERBB4	1.78e-10	3.9989	4.78e-10	Co_Occurrence	ERBB4, PDGFRA	41/306
MDC1	KDR	1.79e-10	4.3732	4.81e-10	Co_Occurrence	KDR, MDC1	36/262
ALK	FLT3	1.79e-10	4.60207	4.81e-10	Co_Occurrence	ALK, FLT3	34/254
PGR	CREBBP	1.82e-10	5.12648	4.89e-10	Co_Occurrence	CREBBP, PGR	30/225
PGR	PTPRT	1.83e-10	3.73537	4.9e-10	Co_Occurrence	PGR, PTPRT	48/409
ARID1B	NF1	1.85e-10	3.53286	4.94e-10	Co_Occurrence	ARID1B, NF1	51/386
EPHA3	ZFHX3	1.9e-10	3.74234	5.08e-10	Co_Occurrence	EPHA3, ZFHX3	44/305
KDR	ARID2	1.93e-10	3.86454	5.17e-10	Co_Occurrence	ARID2, KDR	42/294
KMT2B	APC	2.02e-10	3.90375	5.4e-10	Co_Occurrence	APC, KMT2B	42/311
KRAS	RBM10	2.04e-10	3.94471	5.43e-10	Co_Occurrence	KRAS, RBM10	43/355
PREX2	ATR	2.12e-10	4.5589	5.64e-10	Co_Occurrence	ATR, PREX2	34/253
ATR	EP300	2.15e-10	5.22649	5.71e-10	Co_Occurrence	ATR, EP300	29/215
SETD2	NOTCH2	2.2e-10	4.45154	5.85e-10	Co_Occurrence	NOTCH2, SETD2	35/262
FAT1	PTPRS	2.21e-10	3.93333	5.87e-10	Co_Occurrence	FAT1, PTPRS	42/327
DOT1L	GRIN2A	2.23e-10	3.95789	5.91e-10	Co_Occurrence	DOT1L, GRIN2A	42/336
BRCA2	MGA	2.26e-10	4.41667	5.98e-10	Co_Occurrence	BRCA2, MGA	35/254
IKZF1	ALK	2.26e-10	4.55146	5.98e-10	Co_Occurrence	ALK, IKZF1	34/255
NTRK3	PGR	2.27e-10	5.22662	5.99e-10	Co_Occurrence	NTRK3, PGR	29/218
MGA	PTPRS	2.35e-10	4.90306	6.19e-10	Co_Occurrence	MGA, PTPRS	31/231
ALK	APC	2.37e-10	3.42367	6.24e-10	Co_Occurrence	ALK, APC	51/344
FAT1	BRCA2	2.47e-10	3.53579	6.5e-10	Co_Occurrence	BRCA2, FAT1	48/346
NTRK3	KMT2B	2.53e-10	4.74047	6.65e-10	Co_Occurrence	KMT2B, NTRK3	32/236
TERT	ROS1	2.59e-10	4.21668	6.8e-10	Co_Occurrence	ROS1, TERT	38/305
FLT4	CREBBP	2.64e-10	4.49276	6.93e-10	Co_Occurrence	CREBBP, FLT4	34/249
BRCA2	PIK3C2G	2.69e-10	3.96081	7.04e-10	Co_Occurrence	BRCA2, PIK3C2G	40/288
BRCA2	PIK3CG	2.71e-10	4.38059	7.08e-10	Co_Occurrence	BRCA2, PIK3CG	35/255
PDGFRA	GRIN2A	2.71e-10	3.71447	7.09e-10	Co_Occurrence	GRIN2A, PDGFRA	45/345
IKZF1	PIK3CG	2.76e-10	4.8641	7.21e-10	Co_Occurrence	IKZF1, PIK3CG	31/232
NOTCH4	ARID2	2.77e-10	3.58086	7.22e-10	Co_Occurrence	ARID2, NOTCH4	46/319
ATR	NOTCH4	2.81e-10	4.22539	7.32e-10	Co_Occurrence	ATR, NOTCH4	37/280
NTRK3	BRCA2	2.83e-10	4.47712	7.36e-10	Co_Occurrence	BRCA2, NTRK3	34/249
CREBBP	PTPRD	2.87e-10	3.32299	7.45e-10	Co_Occurrence	CREBBP, PTPRD	53/380
NSD1	KMT2A	2.92e-10	4.75152	7.58e-10	Co_Occurrence	KMT2A, NSD1	32/247
HGF	PIK3CG	3.01e-10	4.70576	7.8e-10	Co_Occurrence	HGF, PIK3CG	32/238
KMT2C	KMT2B	3.01e-10	3.84302	7.8e-10	Co_Occurrence	KMT2B, KMT2C	42/314
PGR	IKZF1	3.14e-10	5.70256	8.12e-10	Co_Occurrence	IKZF1, PGR	26/196
KDR	MET	3.17e-10	4.59247	8.2e-10	Co_Occurrence	KDR, MET	33/250
ANKRD11	KMT2A	3.29e-10	4.59206	8.48e-10	Co_Occurrence	ANKRD11, KMT2A	33/252
ZFHX3	ALK	3.31e-10	3.66206	8.52e-10	Co_Occurrence	ALK, ZFHX3	44/308
ARID1A	EP300	3.32e-10	3.72483	8.55e-10	Co_Occurrence	ARID1A, EP300	44/334
SETD2	NOTCH3	3.33e-10	3.66097	8.56e-10	Co_Occurrence	NOTCH3, SETD2	44/308
KMT2D	TP63	3.39e-10	2.95435	8.72e-10	Co_Occurrence	KMT2D, TP63	65/436
PDGFRA	KMT2C	3.41e-10	3.89578	8.76e-10	Co_Occurrence	KMT2C, PDGFRA	41/311
ARID1A	NOTCH2	3.42e-10	3.85916	8.76e-10	Co_Occurrence	ARID1A, NOTCH2	42/328
EPHB1	KMT2D	3.66e-10	3.65985	9.36e-10	Co_Occurrence	EPHB1, KMT2D	47/397
PTPRS	PIK3C2G	3.75e-10	4.35171	9.6e-10	Co_Occurrence	PIK3C2G, PTPRS	35/267
TET2	SPEN	3.83e-10	4.31216	9.79e-10	Co_Occurrence	SPEN, TET2	35/257
FLT3	TET2	4.19e-10	4.90376	1.07e-09	Co_Occurrence	FLT3, TET2	30/227
KMT2B	BRCA2	4.27e-10	4.62312	1.09e-09	Co_Occurrence	BRCA2, KMT2B	32/239
GRIN2A	NRAS	4.31e-10	2.89387	1.1e-09	Co_Occurrence	GRIN2A, NRAS	65/411
ARID1B	SPEN	4.33e-10	4.50296	1.1e-09	Co_Occurrence	ARID1B, SPEN	33/246
SPEN	IKZF1	4.48e-10	4.75088	1.14e-09	Co_Occurrence	IKZF1, SPEN	31/235
FLT4	PGR	4.54e-10	5.20624	1.15e-09	Co_Occurrence	FLT4, PGR	28/214
ALK	PGR	4.74e-10	4.63789	1.2e-09	Co_Occurrence	ALK, PGR	32/249
TP63	SETD2	4.77e-10	3.60954	1.21e-09	Co_Occurrence	SETD2, TP63	44/310
BRCA2	ALK	4.81e-10	4.00959	1.22e-09	Co_Occurrence	ALK, BRCA2	38/278
ARID1B	FLT4	5.11e-10	4.70822	1.29e-09	Co_Occurrence	ARID1B, FLT4	31/233
SPEN	ROS1	5.11e-10	3.47172	1.29e-09	Co_Occurrence	ROS1, SPEN	47/338
TET2	PTPRS	5.15e-10	4.85204	1.3e-09	Co_Occurrence	PTPRS, TET2	30/228
TET2	HGF	5.29e-10	4.70372	1.33e-09	Co_Occurrence	HGF, TET2	31/234
MTOR	NTRK3	5.37e-10	4.99556	1.35e-09	Co_Occurrence	MTOR, NTRK3	29/222
DOT1L	NF1	5.8e-10	3.67095	1.46e-09	Co_Occurrence	DOT1L, NF1	45/377
FLT3	ARID1A	5.91e-10	3.84177	1.48e-09	Co_Occurrence	ARID1A, FLT3	41/327
APC	PIK3CG	6.39e-10	3.53673	1.6e-09	Co_Occurrence	APC, PIK3CG	45/327
MET	ALK	6.57e-10	4.43917	1.64e-09	Co_Occurrence	ALK, MET	33/255
ERBB4	POLE	6.96e-10	3.6393	1.74e-09	Co_Occurrence	ERBB4, POLE	43/319
EPHB1	BRCA2	7.01e-10	4.92832	1.75e-09	Co_Occurrence	BRCA2, EPHB1	29/224
TP63	PGR	7.17e-10	4.54701	1.79e-09	Co_Occurrence	PGR, TP63	32/252
ATR	KMT2D	7.44e-10	3.45476	1.86e-09	Co_Occurrence	ATR, KMT2D	49/403
PREX2	ARID2	7.48e-10	3.72009	1.86e-09	Co_Occurrence	ARID2, PREX2	41/296
GRIN2A	APC	7.48e-10	2.82935	1.86e-09	Co_Occurrence	APC, GRIN2A	66/417
SPEN	ANKRD11	7.51e-10	4.76773	1.87e-09	Co_Occurrence	ANKRD11, SPEN	30/232
PGR	ARID1A	7.65e-10	3.9552	1.9e-09	Co_Occurrence	ARID1A, PGR	39/322
TET2	NOTCH2	7.73e-10	4.75088	1.92e-09	Co_Occurrence	NOTCH2, TET2	30/230
BRCA2	TP63	7.75e-10	3.92821	1.92e-09	Co_Occurrence	BRCA2, TP63	38/281
PREX2	PDGFRA	7.87e-10	4.2836	1.95e-09	Co_Occurrence	PDGFRA, PREX2	34/259
PGR	PIK3CG	7.99e-10	4.90079	1.98e-09	Co_Occurrence	PGR, PIK3CG	29/226
PREX2	APC	8.21e-10	3.33203	2.03e-09	Co_Occurrence	APC, PREX2	49/343
NF1	ATM	8.36e-10	3.07969	2.06e-09	Co_Occurrence	ATM, NF1	57/407
BRCA2	NOTCH1	8.36e-10	4.25662	2.06e-09	Co_Occurrence	BRCA2, NOTCH1	34/255
MTOR	BRCA2	8.66e-10	4.87401	2.13e-09	Co_Occurrence	BRCA2, MTOR	29/225
PTPRS	KMT2B	8.95e-10	5.01264	2.2e-09	Co_Occurrence	KMT2B, PTPRS	28/216
NOTCH2	EPHA7	8.98e-10	4.36654	2.21e-09	Co_Occurrence	EPHA7, NOTCH2	33/255
PIK3C2G	ARID1A	9.02e-10	3.09761	2.21e-09	Co_Occurrence	ARID1A, PIK3C2G	56/377
CREBBP	PIK3C2G	9.07e-10	3.7612	2.22e-09	Co_Occurrence	CREBBP, PIK3C2G	40/294
PGR	FLT1	9.3e-10	4.86253	2.28e-09	Co_Occurrence	FLT1, PGR	29/227
SETD2	PTPRT	1.01e-09	2.82908	2.48e-09	Co_Occurrence	PTPRT, SETD2	67/453
MGA	ARID1B	1.02e-09	4.43242	2.48e-09	Co_Occurrence	ARID1B, MGA	32/244
EPHB1	CDKN2A	1.03e-09	3.95607	2.52e-09	Co_Occurrence	CDKN2A, EPHB1	38/310
MDC1	EPHA3	1.06e-09	4.12628	2.58e-09	Co_Occurrence	EPHA3, MDC1	35/266
MTOR	ERBB4	1.06e-09	4.01609	2.58e-09	Co_Occurrence	ERBB4, MTOR	37/299
NTRK3	TET2	1.06e-09	4.31058	2.58e-09	Co_Occurrence	NTRK3, TET2	33/250
NTRK3	ALK	1.08e-09	3.94788	2.63e-09	Co_Occurrence	ALK, NTRK3	37/277
ARID1B	NOTCH4	1.09e-09	3.88949	2.64e-09	Co_Occurrence	ARID1B, NOTCH4	38/290
PAK7	MTOR	1.16e-09	4.07314	2.82e-09	Co_Occurrence	MTOR, PAK7	36/290
KMT2B	FLT1	1.17e-09	4.40349	2.83e-09	Co_Occurrence	FLT1, KMT2B	32/245
ATR	DOT1L	1.17e-09	5.29599	2.83e-09	Co_Occurrence	ATR, DOT1L	26/203
TET2	FLT1	1.18e-09	4.18914	2.84e-09	Co_Occurrence	FLT1, TET2	34/257
PIK3CG	ARID1B	1.2e-09	4.397	2.89e-09	Co_Occurrence	ARID1B, PIK3CG	32/245
CREBBP	KMT2C	1.2e-09	3.45068	2.89e-09	Co_Occurrence	CREBBP, KMT2C	45/331
EPHA3	BRCA2	1.21e-09	3.92665	2.91e-09	Co_Occurrence	BRCA2, EPHA3	37/277
EP300	IL7R	1.25e-09	5.09148	3.02e-09	Co_Occurrence	EP300, IL7R	27/211
FLT4	FAT1	1.26e-09	3.46893	3.03e-09	Co_Occurrence	FAT1, FLT4	45/343
EP300	BRCA2	1.35e-09	4.48666	3.26e-09	Co_Occurrence	BRCA2, EP300	31/239
CDKN2A	ERBB4	1.39e-09	2.89606	3.35e-09	Co_Occurrence	CDKN2A, ERBB4	60/394
ATR	ZFHX3	1.4e-09	4.17985	3.36e-09	Co_Occurrence	ATR, ZFHX3	34/266
ZFHX3	PGR	1.4e-09	4.40268	3.36e-09	Co_Occurrence	PGR, ZFHX3	32/257
PTPRD	APC	1.42e-09	2.73694	3.39e-09	Co_Occurrence	APC, PTPRD	69/434
ATRX	ROS1	1.45e-09	3.2051	3.47e-09	Co_Occurrence	ATRX, ROS1	50/354
EP300	KDR	1.47e-09	4.15754	3.5e-09	Co_Occurrence	EP300, KDR	34/262
KMT2C	EPHB1	1.47e-09	3.96226	3.52e-09	Co_Occurrence	EPHB1, KMT2C	37/303
MTOR	IL7R	1.54e-09	5.41407	3.68e-09	Co_Occurrence	IL7R, MTOR	25/197
PTPRS	CARD11	1.56e-09	4.58705	3.72e-09	Co_Occurrence	CARD11, PTPRS	30/235
TERT	NOTCH3	1.58e-09	4.48995	3.76e-09	Co_Occurrence	NOTCH3, TERT	31/250
TET2	ALK	1.59e-09	3.87942	3.79e-09	Co_Occurrence	ALK, TET2	37/279
TERT	EP300	1.67e-09	5.19525	3.96e-09	Co_Occurrence	EP300, TERT	26/206
MDC1	CARD11	1.7e-09	4.32144	4.04e-09	Co_Occurrence	CARD11, MDC1	32/247
KMT2C	FLT3	1.71e-09	3.85143	4.04e-09	Co_Occurrence	FLT3, KMT2C	38/307
TERT	ARID1A	1.74e-09	3.88859	4.13e-09	Co_Occurrence	ARID1A, TERT	38/322
ANKRD11	KMT2B	1.75e-09	4.99915	4.14e-09	Co_Occurrence	ANKRD11, KMT2B	27/213
MTOR	PIK3C2G	1.78e-09	4.24494	4.19e-09	Co_Occurrence	MTOR, PIK3C2G	33/265
TP63	DOT1L	1.81e-09	4.3389	4.26e-09	Co_Occurrence	DOT1L, TP63	32/256
ZFHX3	ARID2	1.82e-09	3.52717	4.28e-09	Co_Occurrence	ARID2, ZFHX3	42/307
NTRK3	CDKN2A	1.9e-09	3.44691	4.47e-09	Co_Occurrence	CDKN2A, NTRK3	44/333
HGF	TP63	2.04e-09	4.09905	4.8e-09	Co_Occurrence	HGF, TP63	34/266
POLE	PIK3CG	2.07e-09	4.1741	4.87e-09	Co_Occurrence	PIK3CG, POLE	33/254
ARID2	NOTCH3	2.08e-09	3.56387	4.87e-09	Co_Occurrence	ARID2, NOTCH3	41/302
GRIN2A	EP300	2.19e-09	3.46091	5.13e-09	Co_Occurrence	EP300, GRIN2A	44/350
KMT2C	IKZF1	2.19e-09	3.80726	5.13e-09	Co_Occurrence	IKZF1, KMT2C	38/308
NOTCH2	CREBBP	2.33e-09	4.49197	5.46e-09	Co_Occurrence	CREBBP, NOTCH2	30/237
EPHB1	SPEN	2.37e-09	4.62725	5.53e-09	Co_Occurrence	EPHB1, SPEN	29/232
TERT	MTOR	2.4e-09	5.49241	5.6e-09	Co_Occurrence	MTOR, TERT	24/192
NOTCH2	TP63	2.41e-09	4.16612	5.63e-09	Co_Occurrence	NOTCH2, TP63	33/262
MGA	FAT1	2.47e-09	3.29139	5.75e-09	Co_Occurrence	FAT1, MGA	47/352
FLT3	ZFHX3	2.48e-09	4.16644	5.78e-09	Co_Occurrence	FLT3, ZFHX3	33/264
NSD1	NOTCH4	2.49e-09	4.19477	5.79e-09	Co_Occurrence	NOTCH4, NSD1	33/273
DOT1L	FAT1	2.56e-09	3.74126	5.95e-09	Co_Occurrence	DOT1L, FAT1	39/327
ATM	IL7R	2.84e-09	4.45671	6.59e-09	Co_Occurrence	ATM, IL7R	30/241
KMT2C	ERBB4	2.87e-09	2.87954	6.65e-09	Co_Occurrence	ERBB4, KMT2C	58/389
POLE	ALK	2.93e-09	3.85102	6.78e-09	Co_Occurrence	ALK, POLE	36/277
FLT4	HGF	3.14e-09	4.54427	7.26e-09	Co_Occurrence	FLT4, HGF	29/230
ANKRD11	NOTCH4	3.14e-09	4.04341	7.27e-09	Co_Occurrence	ANKRD11, NOTCH4	34/278
IL7R	MET	3.15e-09	5.19289	7.28e-09	Co_Occurrence	IL7R, MET	25/201
NSD1	KDR	3.25e-09	4.4411	7.5e-09	Co_Occurrence	KDR, NSD1	30/246
ARID1A	PTPRT	3.34e-09	2.45977	7.7e-09	Co_Occurrence	ARID1A, PTPRT	84/499
PIK3CG	CREBBP	3.35e-09	3.98578	7.71e-09	Co_Occurrence	CREBBP, PIK3CG	34/263
IKZF1	KMT2D	3.39e-09	3.33519	7.81e-09	Co_Occurrence	IKZF1, KMT2D	47/404
ATRX	TP63	3.42e-09	3.48942	7.86e-09	Co_Occurrence	ATRX, TP63	41/305
ARID1A	NOTCH4	3.5e-09	2.89756	8.03e-09	Co_Occurrence	ARID1A, NOTCH4	57/389
BRCA2	ARID2	3.5e-09	3.81656	8.03e-09	Co_Occurrence	ARID2, BRCA2	36/277
POLE	FLT4	3.59e-09	4.26847	8.23e-09	Co_Occurrence	FLT4, POLE	31/244
ALK	SETD2	3.65e-09	3.42584	8.34e-09	Co_Occurrence	ALK, SETD2	42/311
KMT2A	SETD2	3.65e-09	3.42584	8.34e-09	Co_Occurrence	KMT2A, SETD2	42/311
FAT1	MDC1	3.7e-09	3.42311	8.45e-09	Co_Occurrence	FAT1, MDC1	43/341
FLT1	CREBBP	3.96e-09	3.95368	9.04e-09	Co_Occurrence	CREBBP, FLT1	34/264
NOTCH4	PGR	4.03e-09	4.09332	9.19e-09	Co_Occurrence	NOTCH4, PGR	33/275
PGR	IL7R	4.11e-09	5.31569	9.36e-09	Co_Occurrence	IL7R, PGR	24/195
ARID1A	APC	4.15e-09	2.7624	9.44e-09	Co_Occurrence	APC, ARID1A	62/409
EP300	EPHB1	4.38e-09	4.91361	9.97e-09	Co_Occurrence	EP300, EPHB1	26/211
IL7R	PTPRS	4.45e-09	5.0872	1.01e-08	Co_Occurrence	IL7R, PTPRS	25/203
PREX2	FAT1	4.45e-09	3.04732	1.01e-08	Co_Occurrence	FAT1, PREX2	51/369
ATM	NOTCH4	4.53e-09	3.40056	1.03e-08	Co_Occurrence	ATM, NOTCH4	42/315
ARID1A	ATRX	4.75e-09	3.03855	1.08e-08	Co_Occurrence	ARID1A, ATRX	51/369
NOTCH2	FLT4	4.87e-09	4.57414	1.1e-08	Co_Occurrence	FLT4, NOTCH2	28/226
PTPRS	PAK7	4.96e-09	3.79935	1.12e-08	Co_Occurrence	PAK7, PTPRS	36/296
PTPRD	SETD2	5.04e-09	2.8823	1.14e-08	Co_Occurrence	PTPRD, SETD2	58/405
CDKN2A	PAK7	5.26e-09	2.84269	1.19e-08	Co_Occurrence	CDKN2A, PAK7	57/389
EP300	PIK3C2G	5.26e-09	3.83695	1.19e-08	Co_Occurrence	EP300, PIK3C2G	35/279
EP300	MTOR	5.28e-09	4.86139	1.19e-08	Co_Occurrence	EP300, MTOR	26/212
DOT1L	KMT2A	5.3e-09	4.21293	1.19e-08	Co_Occurrence	DOT1L, KMT2A	31/255
NOTCH2	FAT1	5.45e-09	3.54462	1.22e-08	Co_Occurrence	FAT1, NOTCH2	40/333
ATM	EPHA7	5.78e-09	3.58834	1.3e-08	Co_Occurrence	ATM, EPHA7	38/291
POLE	PIK3C2G	5.79e-09	3.66381	1.3e-08	Co_Occurrence	PIK3C2G, POLE	37/289
ANKRD11	PTPRT	5.8e-09	3.35206	1.3e-08	Co_Occurrence	ANKRD11, PTPRT	47/416
BRCA2	CREBBP	5.83e-09	3.96822	1.31e-08	Co_Occurrence	BRCA2, CREBBP	33/260
CREBBP	PAK7	5.86e-09	3.37246	1.31e-08	Co_Occurrence	CREBBP, PAK7	42/321
SETD2	GRIN2A	5.92e-09	2.92936	1.32e-08	Co_Occurrence	GRIN2A, SETD2	55/388
PTPRS	PIK3CG	6.17e-09	4.39003	1.38e-08	Co_Occurrence	PIK3CG, PTPRS	29/236
SPEN	APC	6.21e-09	3.32413	1.38e-08	Co_Occurrence	APC, SPEN	44/332
TERT	KMT2A	6.23e-09	4.29542	1.39e-08	Co_Occurrence	KMT2A, TERT	30/251
MTOR	NOTCH1	6.53e-09	4.50988	1.45e-08	Co_Occurrence	MTOR, NOTCH1	28/230
CARD11	IKZF1	7.15e-09	4.35592	1.59e-08	Co_Occurrence	CARD11, IKZF1	29/237
POLE	MGA	7.37e-09	4.01493	1.64e-08	Co_Occurrence	MGA, POLE	32/255
EPHB1	FAT1	7.41e-09	3.63098	1.64e-08	Co_Occurrence	EPHB1, FAT1	38/328
BRCA2	KMT2A	7.42e-09	3.68684	1.64e-08	Co_Occurrence	BRCA2, KMT2A	36/282
ALK	ATRX	7.44e-09	3.42911	1.65e-08	Co_Occurrence	ALK, ATRX	40/304
NOTCH2	ARID1B	7.52e-09	4.60562	1.66e-08	Co_Occurrence	ARID1B, NOTCH2	27/221
MET	IKZF1	7.53e-09	4.93102	1.66e-08	Co_Occurrence	IKZF1, MET	25/206
ATR	KMT2B	7.64e-09	4.60109	1.69e-08	Co_Occurrence	ATR, KMT2B	27/221
TET2	PGR	7.78e-09	4.60808	1.72e-08	Co_Occurrence	PGR, TET2	27/224
NOTCH1	PIK3CG	8.18e-09	3.90228	1.8e-08	Co_Occurrence	NOTCH1, PIK3CG	33/262
EPHB1	CARD11	8.24e-09	4.45454	1.81e-08	Co_Occurrence	CARD11, EPHB1	28/232
APC	KMT2D	8.31e-09	2.50579	1.83e-08	Co_Occurrence	APC, KMT2D	74/473
NTRK3	IKZF1	8.48e-09	4.43934	1.86e-08	Co_Occurrence	IKZF1, NTRK3	28/230
TET2	ARID1B	8.82e-09	4.18384	1.94e-08	Co_Occurrence	ARID1B, TET2	30/243
ANKRD11	MGA	9.17e-09	4.42591	2.01e-08	Co_Occurrence	ANKRD11, MGA	28/232
IL7R	MGA	9.17e-09	4.42591	2.01e-08	Co_Occurrence	IL7R, MGA	28/232
ATR	MGA	9.4e-09	4.2897	2.06e-08	Co_Occurrence	ATR, MGA	29/238
SPEN	PTPRS	9.55e-09	4.28917	2.09e-08	Co_Occurrence	PTPRS, SPEN	29/239
ARID2	IKZF1	9.55e-09	4.07834	2.09e-08	Co_Occurrence	ARID2, IKZF1	31/256
EPHB1	PREX2	9.58e-09	4.18985	2.09e-08	Co_Occurrence	EPHB1, PREX2	30/251
ARID1B	PIK3C2G	9.63e-09	3.72598	2.1e-08	Co_Occurrence	ARID1B, PIK3C2G	35/282
EP300	NOTCH1	9.64e-09	4.16569	2.1e-08	Co_Occurrence	EP300, NOTCH1	30/244
PDGFRA	NTRK3	9.74e-09	4.27733	2.12e-08	Co_Occurrence	NTRK3, PDGFRA	29/237
FLT1	MTOR	1e-08	4.40558	2.18e-08	Co_Occurrence	FLT1, MTOR	28/233
CARD11	POLE	1.01e-08	3.95124	2.2e-08	Co_Occurrence	CARD11, POLE	32/257
FLT1	ARID2	1.02e-08	3.62908	2.22e-08	Co_Occurrence	ARID2, FLT1	36/283
NOTCH2	CARD11	1.04e-08	4.26649	2.27e-08	Co_Occurrence	CARD11, NOTCH2	29/239
ATM	PDGFRA	1.05e-08	4.04827	2.27e-08	Co_Occurrence	ATM, PDGFRA	31/253
TERT	MGA	1.06e-08	4.53211	2.29e-08	Co_Occurrence	MGA, TERT	27/227
NOTCH4	APC	1.06e-08	2.91019	2.3e-08	Co_Occurrence	APC, NOTCH4	52/370
PGR	KMT2C	1.07e-08	3.75956	2.32e-08	Co_Occurrence	KMT2C, PGR	35/304
EP300	MDC1	1.08e-08	4.37494	2.33e-08	Co_Occurrence	EP300, MDC1	28/230
PTPRS	EPHA7	1.09e-08	4.05075	2.35e-08	Co_Occurrence	EPHA7, PTPRS	31/257
NOTCH3	PGR	1.09e-08	4.16752	2.36e-08	Co_Occurrence	NOTCH3, PGR	30/254
TERT	EPHB1	1.11e-08	5.2083	2.39e-08	Co_Occurrence	EPHB1, TERT	23/193
KDR	APC	1.11e-08	3.117	2.39e-08	Co_Occurrence	APC, KDR	47/347
CDKN2A	PTPRD	1.13e-08	2.55188	2.42e-08	Co_Occurrence	CDKN2A, PTPRD	69/446
MGA	FLT1	1.13e-08	3.8397	2.43e-08	Co_Occurrence	FLT1, MGA	33/264
ARID1B	PTPRT	1.18e-08	3.02158	2.52e-08	Co_Occurrence	ARID1B, PTPRT	51/428
MTOR	KDR	1.18e-08	4.14284	2.53e-08	Co_Occurrence	KDR, MTOR	30/252
ATR	APC	1.19e-08	3.58175	2.55e-08	Co_Occurrence	APC, ATR	37/310
NTRK3	NOTCH2	1.23e-08	4.34905	2.62e-08	Co_Occurrence	NOTCH2, NTRK3	28/232
ANKRD11	FAT1	1.23e-08	3.54299	2.64e-08	Co_Occurrence	ANKRD11, FAT1	38/330
APC	KMT2C	1.24e-08	2.76793	2.64e-08	Co_Occurrence	APC, KMT2C	57/393
EPHB1	EPHA3	1.24e-08	4.13385	2.65e-08	Co_Occurrence	EPHA3, EPHB1	30/253
EP300	PGR	1.25e-08	4.78821	2.66e-08	Co_Occurrence	EP300, PGR	25/210
PGR	FAT1	1.26e-08	3.61057	2.69e-08	Co_Occurrence	FAT1, PGR	37/327
BRCA2	HGF	1.29e-08	4.21407	2.74e-08	Co_Occurrence	BRCA2, HGF	29/239
KDR	CDKN2A	1.3e-08	3.0255	2.76e-08	Co_Occurrence	CDKN2A, KDR	48/357
DOT1L	SETD2	1.3e-08	4.02592	2.76e-08	Co_Occurrence	DOT1L, SETD2	31/262
BRCA2	PREX2	1.34e-08	3.65461	2.84e-08	Co_Occurrence	BRCA2, PREX2	35/279
KMT2C	PIK3CG	1.36e-08	3.23822	2.88e-08	Co_Occurrence	KMT2C, PIK3CG	43/334
CDKN2A	CREBBP	1.39e-08	3.17788	2.94e-08	Co_Occurrence	CDKN2A, CREBBP	44/342
MGA	TET2	1.44e-08	3.88107	3.04e-08	Co_Occurrence	MGA, TET2	32/259
ANKRD11	PREX2	1.45e-08	4.09684	3.06e-08	Co_Occurrence	ANKRD11, PREX2	30/253
CARD11	EP300	1.51e-08	4.068	3.2e-08	Co_Occurrence	CARD11, EP300	30/247
PDGFRA	BRCA2	1.54e-08	4.17344	3.24e-08	Co_Occurrence	BRCA2, PDGFRA	29/240
PGR	MGA	1.57e-08	4.42943	3.32e-08	Co_Occurrence	MGA, PGR	27/229
GRIN2A	PTPRS	1.6e-08	3.38986	3.36e-08	Co_Occurrence	GRIN2A, PTPRS	40/346
NRAS	TP53	1.68e-08	0.439599	3.53e-08	Mutually_Exclusive	NRAS, TP53	65/1121
ARID1B	GRIN2A	1.69e-08	3.22937	3.56e-08	Co_Occurrence	ARID1B, GRIN2A	43/355
NOTCH4	PDGFRA	1.72e-08	3.63269	3.61e-08	Co_Occurrence	NOTCH4, PDGFRA	35/290
PTPRS	ATR	1.74e-08	4.68977	3.65e-08	Co_Occurrence	ATR, PTPRS	25/211
PTPRS	KMT2A	1.84e-08	3.94379	3.86e-08	Co_Occurrence	KMT2A, PTPRS	31/261
EP300	PAK7	1.89e-08	3.48971	3.95e-08	Co_Occurrence	EP300, PAK7	37/306
CDKN2A	NF1	1.89e-08	2.46659	3.96e-08	Co_Occurrence	CDKN2A, NF1	72/464
MET	MDC1	2.03e-08	4.49446	4.23e-08	Co_Occurrence	MDC1, MET	26/220
POLE	PGR	2.05e-08	4.49838	4.28e-08	Co_Occurrence	PGR, POLE	26/222
EPHB1	NOTCH3	2.06e-08	4.02593	4.29e-08	Co_Occurrence	EPHB1, NOTCH3	30/257
ANKRD11	ERBB4	2.06e-08	3.63109	4.3e-08	Co_Occurrence	ANKRD11, ERBB4	35/304
ARID1B	KMT2A	2.15e-08	3.72898	4.48e-08	Co_Occurrence	ARID1B, KMT2A	33/272
NOTCH4	CDKN2A	2.18e-08	2.81188	4.54e-08	Co_Occurrence	CDKN2A, NOTCH4	53/380
HGF	ALK	2.22e-08	3.81014	4.61e-08	Co_Occurrence	ALK, HGF	32/267
EP300	TET2	2.23e-08	4.08904	4.63e-08	Co_Occurrence	EP300, TET2	29/242
MTOR	ALK	2.23e-08	4.00695	4.63e-08	Co_Occurrence	ALK, MTOR	30/257
ANKRD11	IKZF1	2.25e-08	4.78775	4.67e-08	Co_Occurrence	ANKRD11, IKZF1	24/205
FLT3	POLE	2.36e-08	4.31855	4.89e-08	Co_Occurrence	FLT3, POLE	27/229
POLE	MDC1	2.38e-08	4.07339	4.92e-08	Co_Occurrence	MDC1, POLE	29/242
FLT4	DOT1L	2.42e-08	4.45095	5e-08	Co_Occurrence	DOT1L, FLT4	26/222
TET2	TERT	2.45e-08	4.45476	5.06e-08	Co_Occurrence	TERT, TET2	26/224
TERT	MET	2.49e-08	4.94602	5.15e-08	Co_Occurrence	MET, TERT	23/198
PIK3C2G	NOTCH1	2.55e-08	3.41792	5.25e-08	Co_Occurrence	NOTCH1, PIK3C2G	37/297
ARID1B	FLT1	2.55e-08	3.95533	5.26e-08	Co_Occurrence	ARID1B, FLT1	30/250
MET	PREX2	2.64e-08	3.96452	5.44e-08	Co_Occurrence	MET, PREX2	30/256
MGA	ARID2	2.66e-08	3.53449	5.46e-08	Co_Occurrence	ARID2, MGA	35/283
MGA	PREX2	2.66e-08	3.53449	5.46e-08	Co_Occurrence	MGA, PREX2	35/283
FLT4	CDKN2A	2.71e-08	3.25991	5.57e-08	Co_Occurrence	CDKN2A, FLT4	41/333
ERBB4	NOTCH2	2.75e-08	3.50508	5.65e-08	Co_Occurrence	ERBB4, NOTCH2	36/309
MGA	PDGFRA	2.77e-08	4.04212	5.68e-08	Co_Occurrence	MGA, PDGFRA	29/244
DOT1L	KMT2C	2.79e-08	3.582	5.72e-08	Co_Occurrence	DOT1L, KMT2C	35/308
MGA	ARID1A	2.81e-08	3.08404	5.74e-08	Co_Occurrence	ARID1A, MGA	45/355
HGF	ERBB4	2.88e-08	3.42978	5.88e-08	Co_Occurrence	ERBB4, HGF	37/313
ANKRD11	FLT4	2.9e-08	4.40347	5.92e-08	Co_Occurrence	ANKRD11, FLT4	26/223
NTRK3	ARID2	2.94e-08	3.58834	6.01e-08	Co_Occurrence	ARID2, NTRK3	34/278
NOTCH3	PDGFRA	3.05e-08	3.74746	6.23e-08	Co_Occurrence	NOTCH3, PDGFRA	32/269
POLE	PDGFRA	3.1e-08	4.12671	6.31e-08	Co_Occurrence	PDGFRA, POLE	28/237
ARID2	FLT3	3.21e-08	3.92222	6.54e-08	Co_Occurrence	ARID2, FLT3	30/257
APC	FLT1	3.35e-08	3.14273	6.81e-08	Co_Occurrence	APC, FLT1	42/334
NSD1	IKZF1	3.41e-08	4.84831	6.92e-08	Co_Occurrence	IKZF1, NSD1	23/200
IL7R	KMT2D	3.5e-08	3.17431	7.11e-08	Co_Occurrence	IL7R, KMT2D	44/405
MGA	EPHA3	3.54e-08	3.4858	7.18e-08	Co_Occurrence	EPHA3, MGA	35/285
PTPRT	ATRX	3.55e-08	2.63348	7.18e-08	Co_Occurrence	ATRX, PTPRT	61/454
PTPRD	EP300	3.59e-08	3.13532	7.26e-08	Co_Occurrence	EP300, PTPRD	44/373
ATR	IL7R	3.62e-08	4.64773	7.33e-08	Co_Occurrence	ATR, IL7R	24/208
APC	KRAS	3.65e-08	2.50733	7.38e-08	Co_Occurrence	APC, KRAS	66/443
EPHB1	CREBBP	3.66e-08	4.21792	7.4e-08	Co_Occurrence	CREBBP, EPHB1	27/234
CREBBP	PDGFRA	3.69e-08	3.97935	7.45e-08	Co_Occurrence	CREBBP, PDGFRA	29/246
CREBBP	KDR	3.71e-08	3.47717	7.48e-08	Co_Occurrence	CREBBP, KDR	35/285
POLE	NOTCH4	3.74e-08	3.36348	7.53e-08	Co_Occurrence	NOTCH4, POLE	37/303
ATM	KMT2A	3.76e-08	3.35062	7.57e-08	Co_Occurrence	ATM, KMT2A	37/297
NOTCH3	ATR	3.77e-08	3.7961	7.57e-08	Co_Occurrence	ATR, NOTCH3	31/265
ARID1A	ARID2	3.77e-08	2.87215	7.57e-08	Co_Occurrence	ARID1A, ARID2	49/372
FLT3	PDGFRA	3.8e-08	4.47342	7.63e-08	Co_Occurrence	FLT3, PDGFRA	25/216
CREBBP	POLE	4e-08	3.76723	8.03e-08	Co_Occurrence	CREBBP, POLE	31/259
NOTCH2	PIK3C2G	4.01e-08	3.70433	8.04e-08	Co_Occurrence	NOTCH2, PIK3C2G	32/275
SETD2	KMT2C	4.04e-08	2.90507	8.09e-08	Co_Occurrence	KMT2C, SETD2	48/360
EP300	ARID1B	4.05e-08	4.18192	8.09e-08	Co_Occurrence	ARID1B, EP300	27/231
NTRK3	MGA	4.08e-08	3.76319	8.15e-08	Co_Occurrence	MGA, NTRK3	31/259
BRCA2	ARID1A	4.09e-08	3.08524	8.17e-08	Co_Occurrence	ARID1A, BRCA2	44/353
FLT3	PGR	4.1e-08	4.79074	8.17e-08	Co_Occurrence	FLT3, PGR	23/201
POLE	KMT2A	4.17e-08	3.52854	8.31e-08	Co_Occurrence	KMT2A, POLE	34/281
ANKRD11	MTOR	4.21e-08	4.78085	8.39e-08	Co_Occurrence	ANKRD11, MTOR	23/201
MDC1	TET2	4.35e-08	3.9406	8.65e-08	Co_Occurrence	MDC1, TET2	29/246
FLT1	DOT1L	4.41e-08	4.17203	8.77e-08	Co_Occurrence	DOT1L, FLT1	27/235
KMT2D	EPHA3	4.45e-08	2.62981	8.84e-08	Co_Occurrence	EPHA3, KMT2D	59/442
NOTCH2	FLT1	4.45e-08	4.04816	8.84e-08	Co_Occurrence	FLT1, NOTCH2	28/241
PREX2	HGF	4.47e-08	3.7563	8.86e-08	Co_Occurrence	HGF, PREX2	31/264
IKZF1	PDGFRA	4.49e-08	4.42834	8.88e-08	Co_Occurrence	IKZF1, PDGFRA	25/217
PTPRS	PDGFRA	4.49e-08	4.42834	8.88e-08	Co_Occurrence	PDGFRA, PTPRS	25/217
NRAS	ROS1	4.55e-08	2.68221	9e-08	Co_Occurrence	NRAS, ROS1	56/396
ATR	MDC1	4.74e-08	4.27245	9.38e-08	Co_Occurrence	ATR, MDC1	26/225
NOTCH3	POLE	4.77e-08	3.50493	9.42e-08	Co_Occurrence	NOTCH3, POLE	34/282
TET2	NOTCH1	4.8e-08	3.73067	9.47e-08	Co_Occurrence	NOTCH1, TET2	31/260
SETD2	PIK3CG	4.81e-08	3.37324	9.48e-08	Co_Occurrence	PIK3CG, SETD2	36/294
KMT2D	PDGFRA	4.87e-08	2.99114	9.59e-08	Co_Occurrence	KMT2D, PDGFRA	47/413
IL7R	ANKRD11	4.95e-08	4.73072	9.73e-08	Co_Occurrence	ANKRD11, IL7R	23/202
EPHA3	IKZF1	5.01e-08	3.8289	9.85e-08	Co_Occurrence	EPHA3, IKZF1	30/260
TP63	APC	5.07e-08	2.93881	9.96e-08	Co_Occurrence	APC, TP63	47/355
ARID2	PDGFRA	5.37e-08	3.71943	1.05e-07	Co_Occurrence	ARID2, PDGFRA	31/265
ARID1B	SETD2	5.38e-08	3.56078	1.06e-07	Co_Occurrence	ARID1B, SETD2	33/279
TET2	EPHA3	5.47e-08	3.47925	1.07e-07	Co_Occurrence	EPHA3, TET2	34/282
NTRK3	CREBBP	5.51e-08	3.70391	1.08e-07	Co_Occurrence	CREBBP, NTRK3	31/261
MTOR	EPHA7	5.52e-08	3.90948	1.08e-07	Co_Occurrence	EPHA7, MTOR	29/255
HGF	EPHB1	5.54e-08	4.52649	1.08e-07	Co_Occurrence	EPHB1, HGF	24/211
NOTCH3	MET	5.59e-08	3.80942	1.09e-07	Co_Occurrence	MET, NOTCH3	30/262
ATRX	PAK7	5.68e-08	2.99769	1.11e-07	Co_Occurrence	ATRX, PAK7	44/341
SPEN	DOT1L	5.75e-08	4.10897	1.12e-07	Co_Occurrence	DOT1L, SPEN	27/237
ERBB4	ARID2	5.81e-08	2.94317	1.13e-07	Co_Occurrence	ARID2, ERBB4	45/349
NSD1	PTPRT	5.9e-08	3.1591	1.15e-07	Co_Occurrence	NSD1, PTPRT	43/417
NOTCH2	FLT3	5.95e-08	4.50455	1.16e-07	Co_Occurrence	FLT3, NOTCH2	24/211
SETD2	TET2	6.01e-08	3.3996	1.17e-07	Co_Occurrence	SETD2, TET2	35/290
BRAF	IKZF1	6.2e-08	3.02508	1.2e-07	Co_Occurrence	BRAF, IKZF1	46/423
TP63	POLE	6.24e-08	3.45857	1.21e-07	Co_Occurrence	POLE, TP63	34/284
POLE	GRIN2A	6.42e-08	3.00313	1.24e-07	Co_Occurrence	GRIN2A, POLE	44/364
TERT	ARID1B	6.45e-08	4.48737	1.25e-07	Co_Occurrence	ARID1B, TERT	24/213
FAT1	NOTCH1	6.62e-08	2.98867	1.28e-07	Co_Occurrence	FAT1, NOTCH1	44/357
DOT1L	TERT	6.71e-08	4.82729	1.3e-07	Co_Occurrence	DOT1L, TERT	22/196
APC	TERT	6.87e-08	3.56684	1.33e-07	Co_Occurrence	APC, TERT	33/303
TP63	EP300	6.88e-08	3.59076	1.33e-07	Co_Occurrence	EP300, TP63	32/274
SPEN	ATR	6.97e-08	3.94638	1.34e-07	Co_Occurrence	ATR, SPEN	28/244
EP300	PTPRS	7.05e-08	4.30776	1.36e-07	Co_Occurrence	EP300, PTPRS	25/220
TP63	MET	7.13e-08	3.7602	1.37e-07	Co_Occurrence	MET, TP63	30/264
FLT4	APC	7.28e-08	3.20548	1.4e-07	Co_Occurrence	APC, FLT4	39/325
NTRK3	SPEN	7.39e-08	3.64637	1.42e-07	Co_Occurrence	NTRK3, SPEN	31/263
ALK	CREBBP	7.49e-08	3.35974	1.44e-07	Co_Occurrence	ALK, CREBBP	35/290
POLE	PREX2	7.61e-08	3.49078	1.46e-07	Co_Occurrence	POLE, PREX2	33/278
NOTCH1	PTPRT	7.74e-08	2.73048	1.48e-07	Co_Occurrence	NOTCH1, PTPRT	54/441
ATRX	ATR	7.77e-08	3.73601	1.49e-07	Co_Occurrence	ATR, ATRX	30/262
APC	PTPRS	7.79e-08	3.39474	1.49e-07	Co_Occurrence	APC, PTPRS	35/311
EPHB1	IKZF1	7.82e-08	4.59244	1.5e-07	Co_Occurrence	EPHB1, IKZF1	23/205
SPEN	CDKN2A	7.83e-08	3.01299	1.5e-07	Co_Occurrence	CDKN2A, SPEN	43/346
KMT2C	EPHA3	7.84e-08	2.92163	1.5e-07	Co_Occurrence	EPHA3, KMT2C	46/354
FAT1	EPHA3	8.22e-08	2.81514	1.57e-07	Co_Occurrence	EPHA3, FAT1	49/375
MGA	FLT3	8.29e-08	4.01777	1.58e-07	Co_Occurrence	FLT3, MGA	27/238
MTOR	PBRM1	8.3e-08	3.91805	1.58e-07	Co_Occurrence	MTOR, PBRM1	28/249
KMT2C	NTRK3	8.6e-08	3.10483	1.64e-07	Co_Occurrence	KMT2C, NTRK3	40/332
PGR	CARD11	9.01e-08	4.12354	1.71e-07	Co_Occurrence	CARD11, PGR	26/233
EP300	PREX2	9.17e-08	3.61204	1.74e-07	Co_Occurrence	EP300, PREX2	31/268
ARID1B	FLT3	9.28e-08	4.23596	1.76e-07	Co_Occurrence	ARID1B, FLT3	25/222
KMT2B	IKZF1	9.45e-08	4.23078	1.79e-07	Co_Occurrence	IKZF1, KMT2B	25/222
CDKN2A	KMT2A	9.58e-08	2.81985	1.82e-07	Co_Occurrence	CDKN2A, KMT2A	47/364
PIK3C2G	EPHB1	9.61e-08	3.70787	1.82e-07	Co_Occurrence	EPHB1, PIK3C2G	30/270
TERT	FAT1	9.85e-08	3.3875	1.86e-07	Co_Occurrence	FAT1, TERT	35/329
IL7R	BRCA2	1.01e-07	4.09038	1.9e-07	Co_Occurrence	BRCA2, IL7R	26/232
ARID1B	CREBBP	1.01e-07	3.76108	1.91e-07	Co_Occurrence	ARID1B, CREBBP	29/252
KMT2A	SPEN	1.03e-07	3.30596	1.95e-07	Co_Occurrence	KMT2A, SPEN	35/292
MET	ARID2	1.05e-07	3.76806	1.98e-07	Co_Occurrence	ARID2, MET	29/258
GRIN2A	BRAF	1.07e-07	2.20844	2.02e-07	Co_Occurrence	BRAF, GRIN2A	83/517
ARID1A	DOT1L	1.08e-07	3.30428	2.03e-07	Co_Occurrence	ARID1A, DOT1L	36/332
PGR	ANKRD11	1.08e-07	4.67491	2.03e-07	Co_Occurrence	ANKRD11, PGR	22/199
TERT	ALK	1.09e-07	3.86864	2.05e-07	Co_Occurrence	ALK, TERT	28/255
ZFHX3	PBRM1	1.11e-07	3.18365	2.08e-07	Co_Occurrence	PBRM1, ZFHX3	38/308
NTRK3	MET	1.13e-07	4.05981	2.12e-07	Co_Occurrence	MET, NTRK3	26/232
EPHA3	PGR	1.14e-07	3.85515	2.13e-07	Co_Occurrence	EPHA3, PGR	28/254
PAK7	POLE	1.16e-07	3.18115	2.17e-07	Co_Occurrence	PAK7, POLE	38/318
PGR	SPEN	1.16e-07	4.06163	2.17e-07	Co_Occurrence	PGR, SPEN	26/235
TP63	ARID1B	1.17e-07	3.48959	2.2e-07	Co_Occurrence	ARID1B, TP63	32/277
ARID2	APC	1.19e-07	2.91181	2.22e-07	Co_Occurrence	APC, ARID2	45/351
NOTCH2	NOTCH1	1.21e-07	3.92691	2.27e-07	Co_Occurrence	NOTCH1, NOTCH2	27/240
ATR	EPHB1	1.22e-07	4.46022	2.29e-07	Co_Occurrence	ATR, EPHB1	23/208
TERT	BRCA2	1.24e-07	4.17045	2.31e-07	Co_Occurrence	BRCA2, TERT	25/227
MET	HGF	1.25e-07	4.29675	2.34e-07	Co_Occurrence	HGF, MET	24/216
ATM	PTPRS	1.33e-07	3.80728	2.47e-07	Co_Occurrence	ATM, PTPRS	28/250
EPHA3	APC	1.37e-07	2.86898	2.54e-07	Co_Occurrence	APC, EPHA3	45/353
HGF	NTRK3	1.44e-07	3.88412	2.68e-07	Co_Occurrence	HGF, NTRK3	27/240
IL7R	NOTCH2	1.45e-07	4.41034	2.69e-07	Co_Occurrence	IL7R, NOTCH2	23/209
MET	FLT3	1.47e-07	4.40549	2.73e-07	Co_Occurrence	FLT3, MET	23/209
EPHB1	DOT1L	1.48e-07	4.57518	2.74e-07	Co_Occurrence	DOT1L, EPHB1	22/201
EPHB1	MTOR	1.48e-07	4.57518	2.74e-07	Co_Occurrence	EPHB1, MTOR	22/201
CREBBP	ATRX	1.48e-07	3.3063	2.74e-07	Co_Occurrence	ATRX, CREBBP	34/288
CREBBP	EPHA7	1.48e-07	3.3063	2.74e-07	Co_Occurrence	CREBBP, EPHA7	34/288
ANKRD11	NOTCH1	1.49e-07	3.99517	2.76e-07	Co_Occurrence	ANKRD11, NOTCH1	26/235
KMT2C	ATRX	1.53e-07	2.84456	2.83e-07	Co_Occurrence	ATRX, KMT2C	45/355
EPHB1	POLE	1.55e-07	4.1077	2.86e-07	Co_Occurrence	EPHB1, POLE	25/227
SETD2	KMT2D	1.55e-07	2.49959	2.87e-07	Co_Occurrence	KMT2D, SETD2	60/450
KMT2B	CDKN2A	1.56e-07	3.1315	2.87e-07	Co_Occurrence	CDKN2A, KMT2B	38/331
MDC1	SPEN	1.56e-07	3.6698	2.88e-07	Co_Occurrence	MDC1, SPEN	29/255
ALK	NOTCH1	1.58e-07	3.29698	2.9e-07	Co_Occurrence	ALK, NOTCH1	34/289
FLT3	EPHA3	1.6e-07	3.67788	2.94e-07	Co_Occurrence	EPHA3, FLT3	29/261
ATRX	FAT1	1.62e-07	2.74595	2.97e-07	Co_Occurrence	ATRX, FAT1	48/376
ARID1A	IKZF1	1.63e-07	3.21658	2.99e-07	Co_Occurrence	ARID1A, IKZF1	37/336
TERT	PTPRS	1.65e-07	4.54409	3.02e-07	Co_Occurrence	PTPRS, TERT	22/202
MET	PGR	1.69e-07	4.53527	3.1e-07	Co_Occurrence	MET, PGR	22/202
MGA	KMT2D	1.71e-07	2.70092	3.12e-07	Co_Occurrence	KMT2D, MGA	52/429
FAT1	CREBBP	1.74e-07	2.91068	3.18e-07	Co_Occurrence	CREBBP, FAT1	44/360
ARID1B	EPHA7	1.75e-07	3.4874	3.19e-07	Co_Occurrence	ARID1B, EPHA7	31/272
PGR	BRCA2	1.77e-07	4.07793	3.23e-07	Co_Occurrence	BRCA2, PGR	25/229
PGR	PDGFRA	1.78e-07	4.35352	3.25e-07	Co_Occurrence	PDGFRA, PGR	23/211
MTOR	ARID1B	1.78e-07	4.20367	3.25e-07	Co_Occurrence	ARID1B, MTOR	24/219
PTPRD	NOTCH1	1.8e-07	2.80337	3.27e-07	Co_Occurrence	NOTCH1, PTPRD	47/389
ATM	ROS1	1.8e-07	2.89893	3.28e-07	Co_Occurrence	ATM, ROS1	44/353
NOTCH1	TERT	1.81e-07	4.07405	3.29e-07	Co_Occurrence	NOTCH1, TERT	25/230
PREX2	ATRX	1.81e-07	3.15424	3.3e-07	Co_Occurrence	ATRX, PREX2	37/305
NOTCH1	SPEN	1.84e-07	3.46995	3.35e-07	Co_Occurrence	NOTCH1, SPEN	31/269
EP300	FAT1	1.87e-07	3.05364	3.4e-07	Co_Occurrence	EP300, FAT1	39/345
ATM	NOTCH2	1.88e-07	3.72986	3.42e-07	Co_Occurrence	ATM, NOTCH2	28/252
MET	KMT2A	1.9e-07	3.64436	3.44e-07	Co_Occurrence	KMT2A, MET	29/263
PREX2	MTOR	1.92e-07	3.73526	3.48e-07	Co_Occurrence	MTOR, PREX2	28/256
ATR	POLE	1.97e-07	3.92281	3.56e-07	Co_Occurrence	ATR, POLE	26/235
PTPRS	FLT3	1.99e-07	4.31836	3.6e-07	Co_Occurrence	FLT3, PTPRS	23/211
PREX2	ATM	2.08e-07	3.19067	3.75e-07	Co_Occurrence	ATM, PREX2	35/296
ANKRD11	ARID1B	2.09e-07	4.1597	3.78e-07	Co_Occurrence	ANKRD11, ARID1B	24/220
ERBB4	DOT1L	2.11e-07	3.35317	3.81e-07	Co_Occurrence	DOT1L, ERBB4	33/307
CREBBP	CARD11	2.14e-07	3.44146	3.86e-07	Co_Occurrence	CARD11, CREBBP	31/270
NOTCH1	KMT2B	2.18e-07	3.69072	3.93e-07	Co_Occurrence	KMT2B, NOTCH1	28/250
HGF	ZFHX3	2.23e-07	3.44837	4.01e-07	Co_Occurrence	HGF, ZFHX3	31/277
ANKRD11	KDR	2.31e-07	3.69379	4.15e-07	Co_Occurrence	ANKRD11, KDR	28/257
SPEN	MTOR	2.36e-07	3.88691	4.24e-07	Co_Occurrence	MTOR, SPEN	26/239
PDGFRA	SETD2	2.36e-07	3.43626	4.24e-07	Co_Occurrence	PDGFRA, SETD2	31/277
MET	KMT2C	2.36e-07	3.26992	4.24e-07	Co_Occurrence	KMT2C, MET	34/314
DOT1L	NTRK3	2.39e-07	3.99857	4.28e-07	Co_Occurrence	DOT1L, NTRK3	25/230
ERBB4	ATRX	2.4e-07	2.82179	4.29e-07	Co_Occurrence	ATRX, ERBB4	44/352
HGF	KMT2C	2.41e-07	3.20368	4.32e-07	Co_Occurrence	HGF, KMT2C	36/320
PGR	KMT2D	2.43e-07	3.00929	4.35e-07	Co_Occurrence	KMT2D, PGR	41/406
ATR	NTRK3	2.58e-07	3.8593	4.6e-07	Co_Occurrence	ATR, NTRK3	26/237
ATR	ARID2	2.58e-07	3.57594	4.61e-07	Co_Occurrence	ARID2, ATR	29/263
EPHB1	TET2	2.6e-07	3.97762	4.65e-07	Co_Occurrence	EPHB1, TET2	25/231
TERT	CARD11	2.62e-07	3.98177	4.67e-07	Co_Occurrence	CARD11, TERT	25/233
TERT	CREBBP	2.62e-07	3.98177	4.67e-07	Co_Occurrence	CREBBP, TERT	25/233
POLE	KDR	2.66e-07	3.33475	4.74e-07	Co_Occurrence	KDR, POLE	32/280
ATM	TP63	2.73e-07	3.15035	4.85e-07	Co_Occurrence	ATM, TP63	36/302
ALK	PTPRS	2.73e-07	3.56812	4.85e-07	Co_Occurrence	ALK, PTPRS	29/265
MGA	APC	2.82e-07	2.96513	5.01e-07	Co_Occurrence	APC, MGA	40/336
GRIN2A	ARID1A	2.83e-07	2.35054	5.02e-07	Co_Occurrence	ARID1A, GRIN2A	65/448
PGR	NOTCH2	3e-07	4.3606	5.32e-07	Co_Occurrence	NOTCH2, PGR	22/206
KMT2A	HGF	3.08e-07	3.45898	5.45e-07	Co_Occurrence	HGF, KMT2A	30/271
DOT1L	TET2	3.08e-07	3.93521	5.45e-07	Co_Occurrence	DOT1L, TET2	25/232
MTOR	TET2	3.08e-07	3.93521	5.45e-07	Co_Occurrence	MTOR, TET2	25/232
ARID1A	PREX2	3.11e-07	2.6902	5.49e-07	Co_Occurrence	ARID1A, PREX2	47/376
ATR	PDGFRA	3.13e-07	4.05055	5.53e-07	Co_Occurrence	ATR, PDGFRA	24/222
TP63	NRAS	3.15e-07	2.77207	5.56e-07	Co_Occurrence	NRAS, TP63	44/353
SETD2	ROS1	3.18e-07	2.68193	5.6e-07	Co_Occurrence	ROS1, SETD2	47/371
BRCA2	CARD11	3.18e-07	3.44159	5.6e-07	Co_Occurrence	BRCA2, CARD11	30/266
FAT1	PIK3CG	3.33e-07	2.83268	5.87e-07	Co_Occurrence	FAT1, PIK3CG	43/361
PIK3CG	CDKN2A	3.42e-07	2.8717	6.02e-07	Co_Occurrence	CDKN2A, PIK3CG	41/347
ARID1A	FLT1	3.51e-07	2.82147	6.18e-07	Co_Occurrence	ARID1A, FLT1	43/361
IKZF1	ATR	3.59e-07	4.15216	6.31e-07	Co_Occurrence	ATR, IKZF1	23/215
ANKRD11	MET	3.63e-07	4.30284	6.37e-07	Co_Occurrence	ANKRD11, MET	22/207
FLT4	ATM	3.64e-07	3.4176	6.39e-07	Co_Occurrence	ATM, FLT4	30/268
KMT2B	ARID1A	3.67e-07	3.00577	6.43e-07	Co_Occurrence	ARID1A, KMT2B	39/346
CDKN2A	NOTCH3	3.68e-07	2.70757	6.44e-07	Co_Occurrence	CDKN2A, NOTCH3	46/367
FLT3	PIK3CG	3.78e-07	3.77269	6.61e-07	Co_Occurrence	FLT3, PIK3CG	26/241
PDGFRA	KMT2B	3.78e-07	3.87751	6.62e-07	Co_Occurrence	KMT2B, PDGFRA	25/231
MDC1	PIK3CG	3.88e-07	3.56716	6.79e-07	Co_Occurrence	MDC1, PIK3CG	28/254
SPEN	ATM	3.89e-07	3.26403	6.79e-07	Co_Occurrence	ATM, SPEN	32/281
DOT1L	IKZF1	4.17e-07	4.26224	7.26e-07	Co_Occurrence	DOT1L, IKZF1	22/208
MTOR	IKZF1	4.17e-07	4.26224	7.26e-07	Co_Occurrence	IKZF1, MTOR	22/208
MTOR	PTPRS	4.17e-07	4.26224	7.26e-07	Co_Occurrence	MTOR, PTPRS	22/208
ATM	ZFHX3	4.24e-07	3.04798	7.38e-07	Co_Occurrence	ATM, ZFHX3	36/307
BRCA2	APC	4.27e-07	2.95331	7.43e-07	Co_Occurrence	APC, BRCA2	39/334
CREBBP	FLT3	4.28e-07	3.74399	7.44e-07	Co_Occurrence	CREBBP, FLT3	26/242
FLT3	ATM	4.29e-07	3.64633	7.44e-07	Co_Occurrence	ATM, FLT3	27/251
ATM	FAT1	4.37e-07	2.74867	7.57e-07	Co_Occurrence	ATM, FAT1	45/369
PGR	DOT1L	4.37e-07	4.41724	7.57e-07	Co_Occurrence	DOT1L, PGR	21/200
MDC1	FLT1	4.43e-07	3.53965	7.68e-07	Co_Occurrence	FLT1, MDC1	28/255
ARID1A	FAT1	4.49e-07	2.34738	7.78e-07	Co_Occurrence	ARID1A, FAT1	62/439
PGR	MDC1	4.56e-07	4.09039	7.88e-07	Co_Occurrence	MDC1, PGR	23/218
KDR	ATRX	4.69e-07	3.02772	8.1e-07	Co_Occurrence	ATRX, KDR	36/307
MET	ZFHX3	4.69e-07	3.46256	8.11e-07	Co_Occurrence	MET, ZFHX3	29/271
ATM	KMT2C	4.74e-07	2.82602	8.18e-07	Co_Occurrence	ATM, KMT2C	42/348
FLT1	HGF	4.76e-07	3.6165	8.22e-07	Co_Occurrence	FLT1, HGF	27/249
EPHB1	MGA	4.85e-07	3.82558	8.36e-07	Co_Occurrence	EPHB1, MGA	25/236
ARID1B	PAK7	4.86e-07	3.11097	8.37e-07	Co_Occurrence	ARID1B, PAK7	35/313
NOTCH1	CARD11	4.88e-07	3.35916	8.41e-07	Co_Occurrence	CARD11, NOTCH1	30/269
MDC1	NTRK3	4.92e-07	3.60646	8.47e-07	Co_Occurrence	MDC1, NTRK3	27/248
TERT	HGF	4.98e-07	4.21227	8.56e-07	Co_Occurrence	HGF, TERT	22/210
PTPRD	ATRX	5e-07	2.54502	8.59e-07	Co_Occurrence	ATRX, PTPRD	51/408
EP300	DOT1L	5.05e-07	4.05992	8.67e-07	Co_Occurrence	DOT1L, EP300	23/218
DOT1L	NOTCH1	5.07e-07	3.814	8.69e-07	Co_Occurrence	DOT1L, NOTCH1	25/236
MDC1	ATM	5.07e-07	3.43122	8.69e-07	Co_Occurrence	ATM, MDC1	29/264
IL7R	CDKN2A	5.1e-07	3.2364	8.74e-07	Co_Occurrence	CDKN2A, IL7R	34/320
NOTCH1	ERBB4	5.18e-07	2.90774	8.85e-07	Co_Occurrence	ERBB4, NOTCH1	39/335
PAK7	ARID1A	5.18e-07	2.46	8.85e-07	Co_Occurrence	ARID1A, PAK7	55/410
ATRX	FLT4	5.46e-07	3.27295	9.33e-07	Co_Occurrence	ATRX, FLT4	31/279
KDR	PTPRS	5.59e-07	3.50273	9.55e-07	Co_Occurrence	KDR, PTPRS	28/262
ATR	CDKN2A	5.61e-07	3.09391	9.56e-07	Co_Occurrence	ATR, CDKN2A	35/326
EPHB1	KMT2B	5.63e-07	4.0307	9.61e-07	Co_Occurrence	EPHB1, KMT2B	23/219
EPHA7	ARID1A	5.66e-07	2.67	9.64e-07	Co_Occurrence	ARID1A, EPHA7	47/377
KMT2B	EP300	5.83e-07	3.77195	9.93e-07	Co_Occurrence	EP300, KMT2B	25/234
EPHA7	PBRM1	5.85e-07	3.05317	9.96e-07	Co_Occurrence	EPHA7, PBRM1	35/302
EPHA3	KMT2B	5.86e-07	3.33162	9.97e-07	Co_Occurrence	EPHA3, KMT2B	30/274
ANKRD11	EP300	5.89e-07	4.01786	1e-06	Co_Occurrence	ANKRD11, EP300	23/219
NOTCH2	PIK3CG	6.13e-07	3.65897	1.04e-06	Co_Occurrence	NOTCH2, PIK3CG	26/244
SPEN	HGF	6.13e-07	3.56185	1.04e-06	Co_Occurrence	HGF, SPEN	27/251
PTPRS	ATRX	6.26e-07	3.47945	1.06e-06	Co_Occurrence	ATRX, PTPRS	28/263
PIK3C2G	NRAS	6.38e-07	2.66073	1.08e-06	Co_Occurrence	NRAS, PIK3C2G	45/362
MTOR	KMT2B	6.57e-07	3.98855	1.11e-06	Co_Occurrence	KMT2B, MTOR	23/220
APC	ZFHX3	6.74e-07	2.65289	1.14e-06	Co_Occurrence	APC, ZFHX3	45/364
PIK3C2G	BRAF	6.91e-07	2.35016	1.17e-06	Co_Occurrence	BRAF, PIK3C2G	62/470
POLE	SPEN	7.09e-07	3.3619	1.2e-06	Co_Occurrence	POLE, SPEN	29/265
PBRM1	SETD2	7.13e-07	2.95521	1.2e-06	Co_Occurrence	PBRM1, SETD2	36/311
DOT1L	ARID2	7.19e-07	3.54021	1.21e-06	Co_Occurrence	ARID2, DOT1L	27/258
MTOR	ARID2	7.19e-07	3.54021	1.21e-06	Co_Occurrence	ARID2, MTOR	27/258
IKZF1	HGF	7.23e-07	3.96085	1.22e-06	Co_Occurrence	HGF, IKZF1	23/220
PTPRS	HGF	7.23e-07	3.96085	1.22e-06	Co_Occurrence	HGF, PTPRS	23/220
KMT2D	ATRX	7.24e-07	2.43293	1.22e-06	Co_Occurrence	ATRX, KMT2D	56/447
CREBBP	DOT1L	7.27e-07	3.72762	1.22e-06	Co_Occurrence	CREBBP, DOT1L	25/239
ATM	ERBB4	7.52e-07	2.79664	1.26e-06	Co_Occurrence	ATM, ERBB4	41/345
ARID2	NOTCH2	7.84e-07	3.43149	1.32e-06	Co_Occurrence	ARID2, NOTCH2	28/264
PREX2	NOTCH2	7.84e-07	3.43149	1.32e-06	Co_Occurrence	NOTCH2, PREX2	28/264
KMT2C	NOTCH1	7.89e-07	2.83326	1.32e-06	Co_Occurrence	KMT2C, NOTCH1	39/340
DOT1L	EPHA7	8.03e-07	3.51682	1.34e-06	Co_Occurrence	DOT1L, EPHA7	27/259
ATR	CARD11	8.11e-07	3.59521	1.36e-06	Co_Occurrence	ATR, CARD11	26/246
ATR	FLT1	8.11e-07	3.59521	1.36e-06	Co_Occurrence	ATR, FLT1	26/246
DOT1L	ZFHX3	8.13e-07	3.43405	1.36e-06	Co_Occurrence	DOT1L, ZFHX3	28/269
DOT1L	MDC1	8.51e-07	3.91953	1.42e-06	Co_Occurrence	DOT1L, MDC1	23/222
CARD11	ANKRD11	8.55e-07	3.68743	1.42e-06	Co_Occurrence	ANKRD11, CARD11	25/240
FLT1	ANKRD11	8.55e-07	3.68743	1.42e-06	Co_Occurrence	ANKRD11, FLT1	25/240
CREBBP	IL7R	8.55e-07	3.68743	1.42e-06	Co_Occurrence	CREBBP, IL7R	25/240
SETD2	NOTCH4	8.99e-07	2.75057	1.5e-06	Co_Occurrence	NOTCH4, SETD2	41/341
PTPRS	BRCA2	9.14e-07	3.66795	1.52e-06	Co_Occurrence	BRCA2, PTPRS	25/239
KMT2B	MGA	9.17e-07	3.47303	1.52e-06	Co_Occurrence	KMT2B, MGA	27/253
TERT	ARID2	9.2e-07	3.58301	1.53e-06	Co_Occurrence	ARID2, TERT	26/254
TERT	PREX2	9.2e-07	3.58301	1.53e-06	Co_Occurrence	PREX2, TERT	26/254
MDC1	CDKN2A	9.31e-07	2.94711	1.54e-06	Co_Occurrence	CDKN2A, MDC1	37/335
CARD11	APC	9.31e-07	2.80531	1.54e-06	Co_Occurrence	APC, CARD11	39/340
CREBBP	APC	9.31e-07	2.80531	1.54e-06	Co_Occurrence	APC, CREBBP	39/340
ARID1B	NOTCH1	9.35e-07	3.46867	1.55e-06	Co_Occurrence	ARID1B, NOTCH1	27/253
SPEN	PREX2	9.55e-07	3.13476	1.58e-06	Co_Occurrence	PREX2, SPEN	33/291
FLT1	ATM	9.69e-07	3.16529	1.6e-06	Co_Occurrence	ATM, FLT1	31/281
NSD1	ZFHX3	9.78e-07	3.48387	1.62e-06	Co_Occurrence	NSD1, ZFHX3	27/265
MDC1	KMT2B	1.02e-06	3.63944	1.68e-06	Co_Occurrence	KMT2B, MDC1	25/238
ROS1	DOT1L	1.03e-06	3.12782	1.71e-06	Co_Occurrence	DOT1L, ROS1	33/321
PIK3CG	KMT2B	1.04e-06	3.44624	1.72e-06	Co_Occurrence	KMT2B, PIK3CG	27/254
MGA	MET	1.09e-06	3.62883	1.79e-06	Co_Occurrence	MET, MGA	25/241
NOTCH3	PTPRS	1.09e-06	3.36719	1.79e-06	Co_Occurrence	NOTCH3, PTPRS	28/268
FLT3	NOTCH1	1.13e-06	3.61966	1.85e-06	Co_Occurrence	FLT3, NOTCH1	25/241
PDGFRA	FAT1	1.13e-06	2.90343	1.86e-06	Co_Occurrence	FAT1, PDGFRA	37/346
ARID1B	POLE	1.2e-06	3.50345	1.97e-06	Co_Occurrence	ARID1B, POLE	26/247
MET	PIK3CG	1.22e-06	3.60123	2.01e-06	Co_Occurrence	MET, PIK3CG	25/242
NOTCH2	BRCA2	1.24e-06	3.59542	2.03e-06	Co_Occurrence	BRCA2, NOTCH2	25/241
NSD1	GRIN2A	1.27e-06	3.02899	2.08e-06	Co_Occurrence	GRIN2A, NSD1	34/346
KMT2B	ATM	1.3e-06	3.32109	2.13e-06	Co_Occurrence	ATM, KMT2B	28/264
PGR	ATM	1.32e-06	3.59229	2.15e-06	Co_Occurrence	ATM, PGR	25/246
EP300	SETD2	1.33e-06	3.18082	2.18e-06	Co_Occurrence	EP300, SETD2	30/282
EPHB1	FLT3	1.35e-06	4.0707	2.21e-06	Co_Occurrence	EPHB1, FLT3	21/208
PTPRT	BRAF	1.35e-06	1.95125	2.21e-06	Co_Occurrence	BRAF, PTPRT	98/576
CREBBP	TP63	1.42e-06	3.01785	2.31e-06	Co_Occurrence	CREBBP, TP63	33/297
HGF	ANKRD11	1.43e-06	3.91056	2.33e-06	Co_Occurrence	ANKRD11, HGF	22/217
IL7R	PBRM1	1.43e-06	3.47658	2.33e-06	Co_Occurrence	IL7R, PBRM1	26/254
ATR	BRCA2	1.44e-06	3.56017	2.35e-06	Co_Occurrence	ATR, BRCA2	25/242
TERT	NTRK3	1.44e-06	3.78567	2.35e-06	Co_Occurrence	NTRK3, TERT	23/228
TET2	BRCA2	1.47e-06	3.29258	2.39e-06	Co_Occurrence	BRCA2, TET2	28/263
KMT2B	ARID2	1.57e-06	3.21396	2.54e-06	Co_Occurrence	ARID2, KMT2B	29/274
NOTCH3	BRAF	1.61e-06	2.32613	2.62e-06	Co_Occurrence	BRAF, NOTCH3	58/465
NOTCH3	ANKRD11	1.63e-06	3.36732	2.64e-06	Co_Occurrence	ANKRD11, NOTCH3	27/265
MGA	SETD2	1.63e-06	2.98812	2.64e-06	Co_Occurrence	MGA, SETD2	33/299
NOTCH2	EP300	1.64e-06	3.74532	2.65e-06	Co_Occurrence	EP300, NOTCH2	23/226
NOTCH1	FLT1	1.65e-06	3.19804	2.67e-06	Co_Occurrence	FLT1, NOTCH1	29/271
PDGFRA	ARID1B	1.68e-06	3.62445	2.71e-06	Co_Occurrence	ARID1B, PDGFRA	24/234
NSD1	NOTCH3	1.72e-06	3.44597	2.77e-06	Co_Occurrence	NOTCH3, NSD1	26/260
APC	FAT1	1.74e-06	2.33519	2.82e-06	Co_Occurrence	APC, FAT1	56/422
ATRX	NOTCH4	1.75e-06	2.75473	2.83e-06	Co_Occurrence	ATRX, NOTCH4	39/334
ATM	PAK7	1.78e-06	2.75237	2.86e-06	Co_Occurrence	ATM, PAK7	39/338
DOT1L	PTPRS	1.78e-06	3.9898	2.86e-06	Co_Occurrence	DOT1L, PTPRS	21/210
FLT4	MTOR	1.79e-06	3.72543	2.89e-06	Co_Occurrence	FLT4, MTOR	23/228
ATM	HGF	1.81e-06	3.33388	2.91e-06	Co_Occurrence	ATM, HGF	27/260
ARID1B	IKZF1	1.81e-06	3.71965	2.92e-06	Co_Occurrence	ARID1B, IKZF1	23/227
PREX2	CREBBP	1.84e-06	3.04454	2.95e-06	Co_Occurrence	CREBBP, PREX2	32/291
POLE	PTPRS	1.87e-06	3.6013	3e-06	Co_Occurrence	POLE, PTPRS	24/236
TET2	ARID1A	1.94e-06	2.68474	3.11e-06	Co_Occurrence	ARID1A, TET2	40/360
ARID2	PTPRS	1.97e-06	3.32253	3.16e-06	Co_Occurrence	ARID2, PTPRS	27/264
NTRK3	SETD2	1.97e-06	3.02763	3.16e-06	Co_Occurrence	NTRK3, SETD2	32/294
PTPRS	ARID1A	1.99e-06	2.95108	3.2e-06	Co_Occurrence	ARID1A, PTPRS	35/340
MGA	NOTCH2	2e-06	3.48545	3.21e-06	Co_Occurrence	MGA, NOTCH2	25/245
NOTCH2	EPHB1	2.01e-06	3.95422	3.21e-06	Co_Occurrence	EPHB1, NOTCH2	21/211
ATM	APC	2.03e-06	2.66615	3.24e-06	Co_Occurrence	APC, ATM	40/349
NSD1	BRCA2	2.03e-06	3.69678	3.25e-06	Co_Occurrence	BRCA2, NSD1	23/231
KDR	HGF	2.06e-06	3.23327	3.29e-06	Co_Occurrence	HGF, KDR	28/270
TP63	NSD1	2.1e-06	3.40241	3.35e-06	Co_Occurrence	NSD1, TP63	26/262
CARD11	EPHA3	2.15e-06	3.00338	3.43e-06	Co_Occurrence	CARD11, EPHA3	32/293
MET	APC	2.17e-06	3.02789	3.45e-06	Co_Occurrence	APC, MET	32/315
PTPRD	BRAF	2.2e-06	2.00762	3.51e-06	Co_Occurrence	BRAF, PTPRD	84/538
ARID1A	KDR	2.22e-06	2.51597	3.53e-06	Co_Occurrence	ARID1A, KDR	45/380
ARID1B	BRCA2	2.26e-06	3.36483	3.59e-06	Co_Occurrence	ARID1B, BRCA2	26/252
NRAS	IL7R	2.33e-06	3.11026	3.7e-06	Co_Occurrence	IL7R, NRAS	31/306
ARID2	EPHA3	2.33e-06	2.88404	3.71e-06	Co_Occurrence	ARID2, EPHA3	35/310
DOT1L	PIK3CG	2.43e-06	3.54198	3.86e-06	Co_Occurrence	DOT1L, PIK3CG	24/240
NOTCH1	FLT4	2.5e-06	3.26199	3.96e-06	Co_Occurrence	FLT4, NOTCH1	27/260
HGF	FLT3	2.5e-06	3.75607	3.97e-06	Co_Occurrence	FLT3, HGF	22/221
FAT1	SETD2	2.52e-06	2.45318	3.99e-06	Co_Occurrence	FAT1, SETD2	47/389
PIK3CG	ARID1A	2.53e-06	2.64505	4e-06	Co_Occurrence	ARID1A, PIK3CG	41/364
PREX2	NRAS	2.55e-06	2.63777	4.03e-06	Co_Occurrence	NRAS, PREX2	41/351
POLE	TET2	2.57e-06	3.25581	4.06e-06	Co_Occurrence	POLE, TET2	27/260
ATRX	ZFHX3	2.61e-06	2.77247	4.13e-06	Co_Occurrence	ATRX, ZFHX3	36/320
ANKRD11	NOTCH2	2.65e-06	3.87389	4.18e-06	Co_Occurrence	ANKRD11, NOTCH2	21/213
NOTCH2	MDC1	2.72e-06	3.61504	4.29e-06	Co_Occurrence	MDC1, NOTCH2	23/230
NOTCH1	NSD1	2.84e-06	3.61254	4.48e-06	Co_Occurrence	NOTCH1, NSD1	23/234
APC	PAK7	2.84e-06	2.39218	4.48e-06	Co_Occurrence	APC, PAK7	49/393
PIK3C2G	ATM	2.97e-06	2.81346	4.68e-06	Co_Occurrence	ATM, PIK3C2G	35/315
ANKRD11	ARID2	3.01e-06	3.31614	4.73e-06	Co_Occurrence	ANKRD11, ARID2	26/261
ATR	ANKRD11	3.01e-06	3.83723	4.73e-06	Co_Occurrence	ANKRD11, ATR	21/214
EPHA3	MTOR	3.14e-06	3.3081	4.93e-06	Co_Occurrence	EPHA3, MTOR	26/262
CREBBP	ANKRD11	3.17e-06	3.47864	4.97e-06	Co_Occurrence	ANKRD11, CREBBP	24/242
PIK3C2G	SETD2	3.3e-06	2.67943	5.18e-06	Co_Occurrence	PIK3C2G, SETD2	38/333
EPHB1	ANKRD11	3.31e-06	3.9554	5.18e-06	Co_Occurrence	ANKRD11, EPHB1	20/206
MTOR	DOT1L	3.31e-06	3.95503	5.18e-06	Co_Occurrence	DOT1L, MTOR	20/206
POLE	ANKRD11	3.33e-06	3.56773	5.21e-06	Co_Occurrence	ANKRD11, POLE	23/233
NOTCH1	PAK7	3.4e-06	2.73527	5.32e-06	Co_Occurrence	NOTCH1, PAK7	36/330
TERT	PIK3CG	3.53e-06	3.55835	5.52e-06	Co_Occurrence	PIK3CG, TERT	23/236
NTRK3	EP300	3.6e-06	3.34923	5.63e-06	Co_Occurrence	EP300, NTRK3	25/248
ALK	EPHB1	3.61e-06	3.27968	5.64e-06	Co_Occurrence	ALK, EPHB1	26/264
BRCA2	CDKN2A	3.62e-06	2.67219	5.65e-06	Co_Occurrence	BRCA2, CDKN2A	38/348
ERBB4	SETD2	3.68e-06	2.52035	5.74e-06	Co_Occurrence	ERBB4, SETD2	43/365
TERT	PGR	3.69e-06	4.08463	5.74e-06	Co_Occurrence	PGR, TERT	19/198
EP300	HGF	3.69e-06	3.53762	5.74e-06	Co_Occurrence	EP300, HGF	23/232
EPHA3	ANKRD11	3.69e-06	3.27277	5.74e-06	Co_Occurrence	ANKRD11, EPHA3	26/263
POLE	KMT2B	3.7e-06	3.34312	5.75e-06	Co_Occurrence	KMT2B, POLE	25/248
NOTCH1	EPHA7	3.73e-06	2.95818	5.79e-06	Co_Occurrence	EPHA7, NOTCH1	31/291
PBRM1	BRCA2	3.87e-06	3.05553	6e-06	Co_Occurrence	BRCA2, PBRM1	30/282
PIK3CG	ATM	3.99e-06	3.04245	6.19e-06	Co_Occurrence	ATM, PIK3CG	30/282
NOTCH2	TERT	4.07e-06	3.89342	6.31e-06	Co_Occurrence	NOTCH2, TERT	20/208
PDGFRA	KMT2A	4.12e-06	3.0983	6.38e-06	Co_Occurrence	KMT2A, PDGFRA	28/276
ATRX	MGA	4.14e-06	2.93455	6.42e-06	Co_Occurrence	ATRX, MGA	31/292
ANKRD11	NTRK3	4.18e-06	3.51123	6.47e-06	Co_Occurrence	ANKRD11, NTRK3	23/235
ARID2	PIK3CG	4.21e-06	2.93108	6.51e-06	Co_Occurrence	ARID2, PIK3CG	31/292
DOT1L	ALK	4.25e-06	3.24431	6.57e-06	Co_Occurrence	ALK, DOT1L	26/265
TERT	POLE	4.4e-06	3.6112	6.8e-06	Co_Occurrence	POLE, TERT	22/228
PGR	ARID2	4.59e-06	3.31049	7.09e-06	Co_Occurrence	ARID2, PGR	25/258
TET2	ATR	4.6e-06	3.38651	7.09e-06	Co_Occurrence	ATR, TET2	24/243
ARID2	ATRX	4.7e-06	2.78374	7.24e-06	Co_Occurrence	ARID2, ATRX	34/311
PDGFRA	TP53	4.95e-06	2.27437	7.63e-06	Co_Occurrence	PDGFRA, TP53	86/973
ARID1B	APC	5.04e-06	2.78295	7.76e-06	Co_Occurrence	APC, ARID1B	34/328
POLE	MET	5.11e-06	3.46005	7.87e-06	Co_Occurrence	MET, POLE	23/236
ATR	FLT3	5.12e-06	3.68702	7.88e-06	Co_Occurrence	ATR, FLT3	21/218
IKZF1	NOTCH2	5.14e-06	3.68609	7.9e-06	Co_Occurrence	IKZF1, NOTCH2	21/218
ARID1B	MET	5.17e-06	3.56365	7.94e-06	Co_Occurrence	ARID1B, MET	22/227
IL7R	TET2	5.23e-06	3.45639	8.02e-06	Co_Occurrence	IL7R, TET2	23/237
MTOR	FAT1	5.23e-06	2.87556	8.03e-06	Co_Occurrence	FAT1, MTOR	33/339
MGA	IKZF1	5.29e-06	3.35563	8.1e-06	Co_Occurrence	IKZF1, MGA	24/245
KDR	SETD2	5.43e-06	2.69691	8.31e-06	Co_Occurrence	KDR, SETD2	35/320
ANKRD11	ARID1A	5.58e-06	2.85544	8.54e-06	Co_Occurrence	ANKRD11, ARID1A	33/339
ANKRD11	GRIN2A	5.71e-06	2.78353	8.73e-06	Co_Occurrence	ANKRD11, GRIN2A	34/353
PGR	KMT2B	5.72e-06	3.65844	8.74e-06	Co_Occurrence	KMT2B, PGR	21/220
TET2	ARID2	5.84e-06	2.93523	8.91e-06	Co_Occurrence	ARID2, TET2	30/288
NSD1	NF1	5.92e-06	2.74155	9.03e-06	Co_Occurrence	NF1, NSD1	36/389
EPHA3	MET	5.92e-06	3.17098	9.03e-06	Co_Occurrence	EPHA3, MET	26/266
NRAS	EPHA7	6.04e-06	2.52415	9.2e-06	Co_Occurrence	EPHA7, NRAS	40/354
ATM	NOTCH3	6.06e-06	2.80899	9.24e-06	Co_Occurrence	ATM, NOTCH3	33/306
ANKRD11	PDGFRA	6.31e-06	3.62965	9.6e-06	Co_Occurrence	ANKRD11, PDGFRA	21/220
NTRK3	APC	6.32e-06	2.68851	9.61e-06	Co_Occurrence	APC, NTRK3	36/337
PTPRS	PREX2	6.57e-06	3.14758	9.99e-06	Co_Occurrence	PREX2, PTPRS	26/266
NSD1	ANKRD11	6.95e-06	3.88126	1.06e-05	Co_Occurrence	ANKRD11, NSD1	19/203
TERT	ANKRD11	6.95e-06	3.88126	1.06e-05	Co_Occurrence	ANKRD11, TERT	19/203
PGR	EPHB1	7.03e-06	3.8775	1.07e-05	Co_Occurrence	EPHB1, PGR	19/203
NOTCH1	TP63	7.35e-06	2.82338	1.11e-05	Co_Occurrence	NOTCH1, TP63	31/298
ATM	EPHB1	7.52e-06	3.28032	1.14e-05	Co_Occurrence	ATM, EPHB1	24/251
MDC1	PTPRS	7.61e-06	3.46385	1.15e-05	Co_Occurrence	MDC1, PTPRS	22/230
SETD2	PAK7	7.68e-06	2.49261	1.16e-05	Co_Occurrence	PAK7, SETD2	41/358
ROS1	NSD1	7.85e-06	2.90853	1.19e-05	Co_Occurrence	NSD1, ROS1	30/321
ARID1A	EPHA3	7.91e-06	2.39587	1.2e-05	Co_Occurrence	ARID1A, EPHA3	44/384
PGR	MTOR	7.96e-06	3.83847	1.2e-05	Co_Occurrence	MTOR, PGR	19/204
TET2	MET	7.99e-06	3.35197	1.21e-05	Co_Occurrence	MET, TET2	23/240
ERBB4	BRAF	8.32e-06	2.06476	1.26e-05	Co_Occurrence	BRAF, ERBB4	68/500
NSD1	ERBB4	8.34e-06	2.96238	1.26e-05	Co_Occurrence	ERBB4, NSD1	29/309
NTRK3	PTPRS	8.45e-06	3.33782	1.27e-05	Co_Occurrence	NTRK3, PTPRS	23/240
EP300	APC	8.48e-06	2.74138	1.28e-05	Co_Occurrence	APC, EP300	33/327
DOT1L	PREX2	8.62e-06	3.16928	1.3e-05	Co_Occurrence	DOT1L, PREX2	25/262
SETD2	CARD11	8.7e-06	2.81155	1.31e-05	Co_Occurrence	CARD11, SETD2	32/303
NOTCH2	POLE	8.86e-06	3.32566	1.33e-05	Co_Occurrence	NOTCH2, POLE	23/240
MET	BRCA2	8.91e-06	3.32591	1.34e-05	Co_Occurrence	BRCA2, MET	23/241
PIK3CG	MGA	8.94e-06	3.04099	1.34e-05	Co_Occurrence	MGA, PIK3CG	28/273
KDR	ATM	9e-06	2.79825	1.35e-05	Co_Occurrence	ATM, KDR	32/302
FAT1	TP53	9.09e-06	1.76382	1.36e-05	Co_Occurrence	FAT1, TP53	157/975
EPHA7	BRAF	9.1e-06	2.22073	1.36e-05	Co_Occurrence	BRAF, EPHA7	55/466
HGF	KMT2D	9.23e-06	2.51613	1.38e-05	Co_Occurrence	HGF, KMT2D	42/422
FAT1	POLE	9.27e-06	2.56363	1.39e-05	Co_Occurrence	FAT1, POLE	38/361
IKZF1	CDKN2A	9.69e-06	2.79246	1.45e-05	Co_Occurrence	CDKN2A, IKZF1	32/329
CARD11	CDKN2A	1.01e-05	2.53915	1.51e-05	Co_Occurrence	CARD11, CDKN2A	38/354
FLT1	CDKN2A	1.01e-05	2.53915	1.51e-05	Co_Occurrence	CDKN2A, FLT1	38/354
EP300	FLT1	1.02e-05	3.12192	1.52e-05	Co_Occurrence	EP300, FLT1	25/257
PDGFRA	TET2	1.03e-05	3.1991	1.54e-05	Co_Occurrence	PDGFRA, TET2	24/249
FLT4	NSD1	1.05e-05	3.49519	1.57e-05	Co_Occurrence	FLT4, NSD1	21/226
ATM	GRIN2A	1.07e-05	2.3929	1.59e-05	Co_Occurrence	ATM, GRIN2A	43/388
EPHA3	NOTCH2	1.08e-05	3.0443	1.61e-05	Co_Occurrence	EPHA3, NOTCH2	26/270
ANKRD11	ATRX	1.11e-05	3.11525	1.64e-05	Co_Occurrence	ANKRD11, ATRX	25/264
NOTCH1	EPHA3	1.11e-05	2.80299	1.65e-05	Co_Occurrence	EPHA3, NOTCH1	30/294
ARID1A	PTPRD	1.15e-05	2.06029	1.71e-05	Co_Occurrence	ARID1A, PTPRD	64/473
FLT3	APC	1.15e-05	2.85713	1.71e-05	Co_Occurrence	APC, FLT3	31/318
ARID1A	MTOR	1.16e-05	2.75786	1.72e-05	Co_Occurrence	ARID1A, MTOR	32/340
ATR	FAT1	1.19e-05	2.72075	1.76e-05	Co_Occurrence	ATR, FAT1	34/346
NOTCH1	MET	1.23e-05	3.24999	1.82e-05	Co_Occurrence	MET, NOTCH1	23/244
PBRM1	EPHB1	1.23e-05	3.16888	1.83e-05	Co_Occurrence	EPHB1, PBRM1	24/256
ARID1B	IL7R	1.26e-05	3.44315	1.87e-05	Co_Occurrence	ARID1B, IL7R	21/226
NSD1	PTPRS	1.26e-05	3.69644	1.87e-05	Co_Occurrence	NSD1, PTPRS	19/208
EPHA7	ATRX	1.27e-05	2.64793	1.88e-05	Co_Occurrence	ATRX, EPHA7	33/314
MET	EP300	1.32e-05	3.42936	1.95e-05	Co_Occurrence	EP300, MET	21/226
IL7R	ARID1A	1.35e-05	2.72651	1.99e-05	Co_Occurrence	ARID1A, IL7R	32/341
BRAF	ROS1	1.4e-05	1.993	2.06e-05	Co_Occurrence	BRAF, ROS1	70/510
ANKRD11	MDC1	1.41e-05	3.41381	2.08e-05	Co_Occurrence	ANKRD11, MDC1	21/227
APC	PDGFRA	1.43e-05	2.69892	2.1e-05	Co_Occurrence	APC, PDGFRA	32/326
DOT1L	IL7R	1.48e-05	3.6474	2.18e-05	Co_Occurrence	DOT1L, IL7R	19/209
BRCA2	ATM	1.52e-05	2.86936	2.24e-05	Co_Occurrence	ATM, BRCA2	28/281
PBRM1	ROS1	1.53e-05	2.41318	2.25e-05	Co_Occurrence	PBRM1, ROS1	40/366
NOTCH2	PDGFRA	1.55e-05	3.38784	2.27e-05	Co_Occurrence	NOTCH2, PDGFRA	21/227
NSD1	POLE	1.6e-05	3.38454	2.35e-05	Co_Occurrence	NSD1, POLE	21/230
MET	KMT2B	1.66e-05	3.37	2.43e-05	Co_Occurrence	KMT2B, MET	21/228
MET	ATR	1.68e-05	3.47983	2.47e-05	Co_Occurrence	ATR, MET	20/219
ARID2	SETD2	1.75e-05	2.58615	2.57e-05	Co_Occurrence	ARID2, SETD2	34/322
DOT1L	BRCA2	1.76e-05	3.25686	2.58e-05	Co_Occurrence	BRCA2, DOT1L	22/239
NTRK3	ARID1B	1.76e-05	3.07895	2.58e-05	Co_Occurrence	ARID1B, NTRK3	24/253
NSD1	ARID1B	1.8e-05	3.46387	2.63e-05	Co_Occurrence	ARID1B, NSD1	20/221
PBRM1	KMT2C	1.81e-05	2.43329	2.65e-05	Co_Occurrence	KMT2C, PBRM1	39/359
ANKRD11	TET2	1.82e-05	3.24848	2.66e-05	Co_Occurrence	ANKRD11, TET2	22/239
NOTCH1	APC	1.82e-05	2.55373	2.66e-05	Co_Occurrence	APC, NOTCH1	36/343
TP63	MTOR	1.83e-05	3.0103	2.67e-05	Co_Occurrence	MTOR, TP63	25/270
EP300	EPHA3	1.83e-05	2.91646	2.67e-05	Co_Occurrence	EP300, EPHA3	27/278
ARID1A	CARD11	1.86e-05	2.43255	2.7e-05	Co_Occurrence	ARID1A, CARD11	39/369
EPHB1	MET	1.87e-05	3.57649	2.73e-05	Co_Occurrence	EPHB1, MET	19/211
NOTCH2	PTPRS	1.9e-05	3.44518	2.77e-05	Co_Occurrence	NOTCH2, PTPRS	20/220
NRAS	PTPRD	1.9e-05	2.10737	2.77e-05	Co_Occurrence	NRAS, PTPRD	57/450
HGF	CREBBP	1.94e-05	3.05948	2.83e-05	Co_Occurrence	CREBBP, HGF	24/255
EPHA3	NRAS	1.96e-05	2.41455	2.85e-05	Co_Occurrence	EPHA3, NRAS	39/357
ARID2	CDKN2A	1.98e-05	2.37651	2.87e-05	Co_Occurrence	ARID2, CDKN2A	41/371
ATM	ARID2	2e-05	2.67401	2.91e-05	Co_Occurrence	ARID2, ATM	31/304
FLT3	CDKN2A	2.05e-05	2.69365	2.97e-05	Co_Occurrence	CDKN2A, FLT3	31/330
ZFHX3	CDKN2A	2.09e-05	2.32762	3.03e-05	Co_Occurrence	CDKN2A, ZFHX3	43/380
ARID1B	PREX2	2.12e-05	2.87543	3.07e-05	Co_Occurrence	ARID1B, PREX2	27/279
IKZF1	CREBBP	2.19e-05	3.11432	3.17e-05	Co_Occurrence	CREBBP, IKZF1	23/249
CREBBP	EPHA3	2.2e-05	2.73714	3.19e-05	Co_Occurrence	CREBBP, EPHA3	30/297
ALK	EP300	2.26e-05	2.85996	3.27e-05	Co_Occurrence	ALK, EP300	27/281
PGR	ATR	2.29e-05	3.51761	3.31e-05	Co_Occurrence	ATR, PGR	19/213
NSD1	PTPRD	2.34e-05	2.62954	3.37e-05	Co_Occurrence	NSD1, PTPRD	33/371
ATR	NOTCH1	2.39e-05	3.09352	3.44e-05	Co_Occurrence	ATR, NOTCH1	23/249
MDC1	SETD2	2.4e-05	2.77595	3.46e-05	Co_Occurrence	MDC1, SETD2	28/290
NSD1	DOT1L	2.42e-05	3.63953	3.48e-05	Co_Occurrence	DOT1L, NSD1	18/204
NOTCH1	NTRK3	2.45e-05	2.94177	3.52e-05	Co_Occurrence	NOTCH1, NTRK3	26/268
SETD2	HGF	2.47e-05	2.84055	3.56e-05	Co_Occurrence	HGF, SETD2	27/284
PBRM1	EP300	2.48e-05	2.93874	3.56e-05	Co_Occurrence	EP300, PBRM1	26/271
SPEN	EPHA3	2.54e-05	2.69482	3.65e-05	Co_Occurrence	EPHA3, SPEN	30/299
PAK7	DOT1L	2.57e-05	2.78082	3.69e-05	Co_Occurrence	DOT1L, PAK7	28/306
CDKN2A	DOT1L	2.59e-05	2.71275	3.71e-05	Co_Occurrence	CDKN2A, DOT1L	30/327
BRCA2	SETD2	2.59e-05	2.69069	3.71e-05	Co_Occurrence	BRCA2, SETD2	30/301
MTOR	MGA	2.63e-05	3.15908	3.78e-05	Co_Occurrence	MGA, MTOR	22/243
PTPRS	SETD2	2.69e-05	2.91449	3.85e-05	Co_Occurrence	PTPRS, SETD2	26/278
APC	TET2	2.69e-05	2.53505	3.85e-05	Co_Occurrence	APC, TET2	35/341
KDR	DOT1L	2.75e-05	2.99229	3.94e-05	Co_Occurrence	DOT1L, KDR	24/264
FAT1	ARID1B	2.88e-05	2.5143	4.12e-05	Co_Occurrence	ARID1B, FAT1	35/356
EPHB1	APC	2.98e-05	2.7684	4.26e-05	Co_Occurrence	APC, EPHB1	29/316
ANKRD11	PTPRS	3e-05	3.43838	4.28e-05	Co_Occurrence	ANKRD11, PTPRS	19/215
ARID1A	MDC1	3.02e-05	2.50161	4.3e-05	Co_Occurrence	ARID1A, MDC1	35/356
PBRM1	KMT2D	3.04e-05	2.16616	4.33e-05	Co_Occurrence	KMT2D, PBRM1	50/451
BRCA2	ATRX	3.04e-05	2.75511	4.34e-05	Co_Occurrence	ATRX, BRCA2	29/292
POLE	EP300	3.13e-05	3.02935	4.46e-05	Co_Occurrence	EP300, POLE	23/250
ALK	PBRM1	3.17e-05	2.60856	4.51e-05	Co_Occurrence	ALK, PBRM1	32/312
SPEN	PBRM1	3.2e-05	2.73233	4.55e-05	Co_Occurrence	PBRM1, SPEN	29/292
MTOR	CREBBP	3.2e-05	3.11223	4.56e-05	Co_Occurrence	CREBBP, MTOR	22/245
BRAF	TP63	3.27e-05	2.10315	4.65e-05	Co_Occurrence	BRAF, TP63	55/473
NOTCH2	DOT1L	3.33e-05	3.4079	4.73e-05	Co_Occurrence	DOT1L, NOTCH2	19/216
NOTCH2	MTOR	3.33e-05	3.4079	4.73e-05	Co_Occurrence	MTOR, NOTCH2	19/216
ATM	SETD2	3.38e-05	2.58415	4.79e-05	Co_Occurrence	ATM, SETD2	32/314
PDGFRA	EPHA3	3.38e-05	2.84424	4.8e-05	Co_Occurrence	EPHA3, PDGFRA	26/277
ARID1A	NTRK3	3.4e-05	2.43125	4.82e-05	Co_Occurrence	ARID1A, NTRK3	37/364
MDC1	PBRM1	3.48e-05	2.83415	4.93e-05	Co_Occurrence	MDC1, PBRM1	26/275
NOTCH2	APC	3.51e-05	2.6383	4.96e-05	Co_Occurrence	APC, NOTCH2	30/323
FLT3	NRAS	3.65e-05	2.70016	5.16e-05	Co_Occurrence	FLT3, NRAS	29/314
EPHA3	PTPRS	3.65e-05	2.93933	5.16e-05	Co_Occurrence	EPHA3, PTPRS	25/270
KMT2C	CDKN2A	3.78e-05	2.11564	5.34e-05	Co_Occurrence	CDKN2A, KMT2C	50/419
ATM	NSD1	3.96e-05	3.06656	5.59e-05	Co_Occurrence	ATM, NSD1	22/250
IL7R	POLE	4.03e-05	3.14411	5.68e-05	Co_Occurrence	IL7R, POLE	21/237
MET	PTPRS	4.24e-05	3.33823	5.98e-05	Co_Occurrence	MET, PTPRS	19/218
MGA	NOTCH1	4.25e-05	2.78292	5.98e-05	Co_Occurrence	MGA, NOTCH1	26/275
HGF	NOTCH1	4.46e-05	2.95077	6.28e-05	Co_Occurrence	HGF, NOTCH1	23/254
NF1	TP53	4.54e-05	1.61912	6.39e-05	Co_Occurrence	NF1, TP53	184/983
PAK7	NRAS	4.65e-05	2.19974	6.53e-05	Co_Occurrence	NRAS, PAK7	45/393
NSD1	EP300	4.66e-05	3.31386	6.54e-05	Co_Occurrence	EP300, NSD1	19/220
NSD1	CREBBP	4.67e-05	3.11147	6.56e-05	Co_Occurrence	CREBBP, NSD1	21/241
ATRX	PIK3C2G	4.68e-05	2.45628	6.56e-05	Co_Occurrence	ATRX, PIK3C2G	34/330
POLE	EPHA3	4.81e-05	2.71432	6.74e-05	Co_Occurrence	EPHA3, POLE	28/290
NOTCH1	IKZF1	5.18e-05	2.99595	7.26e-05	Co_Occurrence	IKZF1, NOTCH1	22/248
NSD1	SETD2	5.2e-05	2.96035	7.28e-05	Co_Occurrence	NSD1, SETD2	24/270
TERT	SETD2	5.2e-05	2.96035	7.28e-05	Co_Occurrence	SETD2, TERT	24/270
ATR	HGF	5.31e-05	3.16758	7.42e-05	Co_Occurrence	ATR, HGF	20/229
PTPRS	IKZF1	5.31e-05	3.27446	7.42e-05	Co_Occurrence	IKZF1, PTPRS	19/220
IKZF1	PBRM1	5.31e-05	2.94783	7.42e-05	Co_Occurrence	IKZF1, PBRM1	24/263
ANKRD11	EPHA7	5.38e-05	2.94183	7.51e-05	Co_Occurrence	ANKRD11, EPHA7	24/266
MET	CREBBP	5.38e-05	2.98797	7.51e-05	Co_Occurrence	CREBBP, MET	22/249
CDKN2A	MGA	5.39e-05	2.38447	7.52e-05	Co_Occurrence	CDKN2A, MGA	36/356
PIK3CG	PBRM1	5.54e-05	2.66197	7.72e-05	Co_Occurrence	PBRM1, PIK3CG	28/291
PBRM1	CARD11	5.93e-05	2.64139	8.26e-05	Co_Occurrence	CARD11, PBRM1	28/292
PBRM1	CREBBP	5.93e-05	2.64139	8.26e-05	Co_Occurrence	CREBBP, PBRM1	28/292
FLT3	SETD2	6.02e-05	2.78669	8.38e-05	Co_Occurrence	FLT3, SETD2	25/279
ARID2	MDC1	6.18e-05	2.70328	8.6e-05	Co_Occurrence	ARID2, MDC1	26/282
PBRM1	NOTCH4	6.27e-05	2.3891	8.71e-05	Co_Occurrence	NOTCH4, PBRM1	34/336
ATM	POLE	6.37e-05	2.69457	8.85e-05	Co_Occurrence	ATM, POLE	26/280
EPHA3	CDKN2A	6.47e-05	2.25887	8.98e-05	Co_Occurrence	CDKN2A, EPHA3	40/375
GRIN2A	KRAS	6.71e-05	0.411392	9.31e-05	Mutually_Exclusive	GRIN2A, KRAS	20/580
MDC1	CREBBP	6.71e-05	2.84646	9.31e-05	Co_Occurrence	CREBBP, MDC1	24/263
ARID2	HGF	6.74e-05	2.75438	9.34e-05	Co_Occurrence	ARID2, HGF	25/276
HGF	MDC1	6.76e-05	3.01264	9.36e-05	Co_Occurrence	HGF, MDC1	21/240
FLT1	SETD2	7.09e-05	2.56436	9.82e-05	Co_Occurrence	FLT1, SETD2	30/307
PBRM1	PTPRD	7.32e-05	2.15706	0.000101291	Co_Occurrence	PBRM1, PTPRD	44/414
FLT3	ATRX	7.33e-05	2.82291	0.000101353	Co_Occurrence	ATRX, FLT3	24/270
MET	MTOR	7.54e-05	3.29062	0.000104213	Co_Occurrence	MET, MTOR	18/214
PDGFRA	MDC1	7.55e-05	2.98547	0.000104297	Co_Occurrence	MDC1, PDGFRA	21/241
NOTCH1	ARID2	7.66e-05	2.57761	0.000105691	Co_Occurrence	ARID2, NOTCH1	28/296
NOTCH1	PREX2	7.66e-05	2.57761	0.000105691	Co_Occurrence	NOTCH1, PREX2	28/296
TET2	NSD1	7.92e-05	3.06827	0.000109143	Co_Occurrence	NSD1, TET2	20/236
ALK	CDKN2A	7.96e-05	2.21136	0.000109688	Co_Occurrence	ALK, CDKN2A	40/378
TET2	PBRM1	7.99e-05	2.65354	0.000110014	Co_Occurrence	PBRM1, TET2	27/287
ARID1B	PGR	8e-05	3.1622	0.000110084	Co_Occurrence	ARID1B, PGR	19/225
HGF	MGA	8.18e-05	2.92844	0.00011253	Co_Occurrence	HGF, MGA	23/255
MTOR	FLT3	8.39e-05	3.25918	0.000115279	Co_Occurrence	FLT3, MTOR	18/215
APC	IL7R	8.54e-05	2.57409	0.000117257	Co_Occurrence	APC, IL7R	28/320
KDR	BRAF	8.86e-05	2.04821	0.000121565	Co_Occurrence	BRAF, KDR	52/471
PREX2	BRAF	8.86e-05	2.04821	0.000121565	Co_Occurrence	BRAF, PREX2	52/471
MTOR	PIK3CG	9.21e-05	2.94179	0.000126254	Co_Occurrence	MTOR, PIK3CG	21/246
NOTCH2	CDKN2A	9.42e-05	2.488	0.000129033	Co_Occurrence	CDKN2A, NOTCH2	30/335
APC	HGF	9.45e-05	2.48291	0.000129392	Co_Occurrence	APC, HGF	30/329
ATR	SETD2	9.6e-05	2.67733	0.000131454	Co_Occurrence	ATR, SETD2	25/283
ARID1B	EPHA3	0.000105441	2.69183	0.000144248	Co_Occurrence	ARID1B, EPHA3	26/283
FLT4	PBRM1	0.000105814	2.69034	0.000144673	Co_Occurrence	FLT4, PBRM1	26/281
NSD1	PAK7	0.000109496	2.67582	0.000149618	Co_Occurrence	NSD1, PAK7	26/304
MET	PDGFRA	0.000110196	3.07272	0.000150486	Co_Occurrence	MET, PDGFRA	19/227
DOT1L	KMT2B	0.000115528	3.06078	0.000157674	Co_Occurrence	DOT1L, KMT2B	19/228
PREX2	SETD2	0.000116079	2.37237	0.000158333	Co_Occurrence	PREX2, SETD2	32/326
TERT	PDGFRA	0.000117225	3.1627	0.000159802	Co_Occurrence	PDGFRA, TERT	18/219
HGF	ARID1A	0.000123575	2.37327	0.000168359	Co_Occurrence	ARID1A, HGF	32/354
HGF	CDKN2A	0.000126108	2.45366	0.000171708	Co_Occurrence	CDKN2A, HGF	31/339
DOT1L	ARID1B	0.000127203	3.03486	0.000173097	Co_Occurrence	ARID1B, DOT1L	19/229
TP63	ARID1A	0.000131144	2.14192	0.000178356	Co_Occurrence	ARID1A, TP63	42/394
EPHA3	SETD2	0.000133642	2.34029	0.000181646	Co_Occurrence	EPHA3, SETD2	32/328
CDKN2A	MET	0.000134618	2.47198	0.000182865	Co_Occurrence	CDKN2A, MET	29/333
PIK3CG	ATR	0.000135243	2.86679	0.000183552	Co_Occurrence	ATR, PIK3CG	22/253
BRAF	NOTCH4	0.000135282	1.91437	0.000183552	Co_Occurrence	BRAF, NOTCH4	58/492
TET2	ATRX	0.000136487	2.51341	0.000185077	Co_Occurrence	ATRX, TET2	27/295
MDC1	MTOR	0.00013991	3.00935	0.000189569	Co_Occurrence	MDC1, MTOR	19/230
MDC1	APC	0.000139963	2.41035	0.000189569	Co_Occurrence	APC, MDC1	31/335
SETD2	CREBBP	0.000140656	2.44534	0.000190396	Co_Occurrence	CREBBP, SETD2	29/309
ATRX	EPHA3	0.000140946	2.40664	0.000190677	Co_Occurrence	ATRX, EPHA3	31/319
MDC1	MGA	0.00014116	2.72581	0.000190855	Co_Occurrence	MDC1, MGA	23/263
ANKRD11	ATM	0.000141474	2.84638	0.000191115	Co_Occurrence	ANKRD11, ATM	22/257
PGR	CDKN2A	0.000141518	2.56833	0.000191115	Co_Occurrence	CDKN2A, PGR	28/327
SPEN	NOTCH2	0.000146156	2.83053	0.000197264	Co_Occurrence	NOTCH2, SPEN	22/255
NSD1	FLT3	0.000147551	3.2106	0.00019903	Co_Occurrence	FLT3, NSD1	17/211
NOTCH2	HGF	0.00015311	2.98387	0.000206408	Co_Occurrence	HGF, NOTCH2	19/230
ATRX	CARD11	0.000162724	2.50106	0.000219233	Co_Occurrence	ATRX, CARD11	28/300
KMT2A	ATRX	0.000162813	2.35885	0.000219233	Co_Occurrence	ATRX, KMT2A	31/322
ARID2	EP300	0.000163107	2.65426	0.000219501	Co_Occurrence	ARID2, EP300	25/280
PTPRS	CDKN2A	0.000168313	2.41987	0.000226271	Co_Occurrence	CDKN2A, PTPRS	29/335
EP300	CDKN2A	0.000168333	2.35981	0.000226271	Co_Occurrence	CDKN2A, EP300	31/343
PBRM1	APC	0.000169889	2.19984	0.000228229	Co_Occurrence	APC, PBRM1	36/362
SPEN	ARID2	0.000171225	2.47942	0.000229891	Co_Occurrence	ARID2, SPEN	28/301
MET	NOTCH2	0.000175052	3.04622	0.000234892	Co_Occurrence	MET, NOTCH2	18/222
MGA	ATM	0.000184441	2.5078	0.000247348	Co_Occurrence	ATM, MGA	26/289
ANKRD11	TP63	0.000194608	2.65256	0.000260832	Co_Occurrence	ANKRD11, TP63	23/275
NSD1	NOTCH2	0.000197548	3.12173	0.000264619	Co_Occurrence	NOTCH2, NSD1	17/214
ATRX	ARID1B	0.000202356	2.56667	0.000270902	Co_Occurrence	ARID1B, ATRX	25/284
PDGFRA	EPHB1	0.000204099	3.00359	0.000273077	Co_Occurrence	EPHB1, PDGFRA	18/224
MTOR	HGF	0.000206594	2.99999	0.000276255	Co_Occurrence	HGF, MTOR	18/224
ROS1	KRAS	0.000206883	0.421617	0.000276482	Mutually_Exclusive	KRAS, ROS1	18/551
IKZF1	ATM	0.000211607	2.707	0.000282631	Co_Occurrence	ATM, IKZF1	22/262
ATR	TERT	0.00021723	3.09314	0.000289895	Co_Occurrence	ATR, TERT	17/215
NSD1	ARID1A	0.000217296	2.431	0.000289895	Co_Occurrence	ARID1A, NSD1	28/342
ATRX	MDC1	0.000217847	2.54403	0.000290463	Co_Occurrence	ATRX, MDC1	25/285
NSD1	MDC1	0.000224406	2.97854	0.000299035	Co_Occurrence	MDC1, NSD1	18/226
PDGFRA	MTOR	0.000227049	2.97359	0.000302383	Co_Occurrence	MTOR, PDGFRA	18/225
NOTCH1	SETD2	0.000239332	2.38458	0.000318558	Co_Occurrence	NOTCH1, SETD2	28/308
MET	SPEN	0.000249107	2.76363	0.000331379	Co_Occurrence	MET, SPEN	21/253
PTPRD	TP53	0.000259615	1.5596	0.000345158	Co_Occurrence	PTPRD, TP53	169/989
KEAP1	BRAF	0.000265181	0.336861	0.000352355	Mutually_Exclusive	BRAF, KEAP1	10/518
NOTCH2	TP53	0.000266388	1.93904	0.000353756	Co_Occurrence	NOTCH2, TP53	77/984
NOTCH1	CDKN2A	0.000269636	2.21427	0.000357863	Co_Occurrence	CDKN2A, NOTCH1	34/359
PGR	TP53	0.000278688	2.00799	0.000369666	Co_Occurrence	PGR, TP53	71/984
MGA	BRAF	0.000283928	2.01869	0.0003764	Co_Occurrence	BRAF, MGA	45/460
PDGFRA	ATRX	0.000284298	2.56291	0.000376675	Co_Occurrence	ATRX, PDGFRA	24/280
NOTCH2	ATR	0.000289101	2.90576	0.000382818	Co_Occurrence	ATR, NOTCH2	18/227
TET2	PIK3CG	0.000290341	2.553	0.000384241	Co_Occurrence	PIK3CG, TET2	24/276
NSD1	MTOR	0.000301584	3.10967	0.000398892	Co_Occurrence	MTOR, NSD1	16/208
ATM	MTOR	0.000302064	2.69984	0.000399298	Co_Occurrence	ATM, MTOR	21/258
CREBBP	ARID2	0.000303639	2.39447	0.00040115	Co_Occurrence	ARID2, CREBBP	27/301
FLT3	ANKRD11	0.000305455	2.99076	0.000403319	Co_Occurrence	ANKRD11, FLT3	17/218
ARID1B	HGF	0.000306733	2.84481	0.000404776	Co_Occurrence	ARID1B, HGF	20/241
ATRX	IL7R	0.000309798	2.60981	0.000408586	Co_Occurrence	ATRX, IL7R	22/270
NRAS	NOTCH4	0.000316067	2.04619	0.000416618	Co_Occurrence	NOTCH4, NRAS	40/386
EPHB1	NOTCH1	0.000316943	2.8239	0.000417534	Co_Occurrence	EPHB1, NOTCH1	20/245
KMT2B	NRAS	0.000330223	2.32738	0.000434781	Co_Occurrence	KMT2B, NRAS	29/329
NSD1	IL7R	0.000331697	3.07944	0.000436473	Co_Occurrence	IL7R, NSD1	16/209
FLT4	TP53	0.000333415	1.85382	0.000438484	Co_Occurrence	FLT4, TP53	87/984
NSD1	HGF	0.000343571	2.95731	0.000451584	Co_Occurrence	HGF, NSD1	17/220
ATRX	POLE	0.000348213	2.46522	0.000457426	Co_Occurrence	ATRX, POLE	26/293
IL7R	NOTCH1	0.000354356	2.76705	0.000465231	Co_Occurrence	IL7R, NOTCH1	20/247
ATRX	TERT	0.000376904	2.63895	0.000494553	Co_Occurrence	ATRX, TERT	21/265
ARID1A	PDGFRA	0.000378235	2.24478	0.000496018	Co_Occurrence	ARID1A, PDGFRA	31/357
ANKRD11	PIK3CG	0.000391313	2.72632	0.000512878	Co_Occurrence	ANKRD11, PIK3CG	20/249
EP300	ATM	0.000393676	2.56913	0.000515681	Co_Occurrence	ATM, EP300	23/272
TERT	EPHA3	0.000401084	2.62216	0.000525088	Co_Occurrence	EPHA3, TERT	21/266
MTOR	ATR	0.000402802	2.90987	0.000527039	Co_Occurrence	ATR, MTOR	17/221
PGR	HGF	0.000422625	2.8966	0.000552663	Co_Occurrence	HGF, PGR	17/222
DOT1L	NOTCH4	0.000424371	2.45356	0.000554633	Co_Occurrence	DOT1L, NOTCH4	24/297
TERT	ATM	0.00043218	2.69316	0.00056452	Co_Occurrence	ATM, TERT	20/254
POLE	APC	0.000433414	2.20478	0.000565812	Co_Occurrence	APC, POLE	31/345
NSD1	MET	0.000438199	2.99202	0.000571736	Co_Occurrence	MET, NSD1	16/212
NRAS	ARID2	0.00046176	2.09572	0.000601798	Co_Occurrence	ARID2, NRAS	35/363
NRAS	KDR	0.00046176	2.09572	0.000601798	Co_Occurrence	KDR, NRAS	35/363
CDKN2A	TP53	0.000465529	1.58281	0.000606367	Co_Occurrence	CDKN2A, TP53	141/989
RBM10	ATM	0.000470848	2.66442	0.00061295	Co_Occurrence	ATM, RBM10	20/255
SPEN	SETD2	0.000485483	2.29365	0.000631647	Co_Occurrence	SETD2, SPEN	28/313
ARID1B	ATR	0.00050008	2.78147	0.000650272	Co_Occurrence	ARID1B, ATR	19/238
EPHB1	ARID1A	0.00050163	2.29592	0.000651922	Co_Occurrence	ARID1A, EPHB1	28/347
ATRX	NOTCH3	0.000505939	2.23874	0.000657152	Co_Occurrence	ATRX, NOTCH3	30/325
NRAS	BRAF	0.000507008	0.467878	0.00065817	Mutually_Exclusive	BRAF, NRAS	22/586
DOT1L	APC	0.000512668	2.3436	0.000665145	Co_Occurrence	APC, DOT1L	26/323
IKZF1	SETD2	0.000539566	2.45984	0.00069965	Co_Occurrence	IKZF1, SETD2	23/284
NSD1	PIK3CG	0.000545962	2.73769	0.000707547	Co_Occurrence	NSD1, PIK3CG	19/244
ERBB4	TP53	0.000558749	1.59147	0.000723713	Co_Occurrence	ERBB4, TP53	134/989
NOTCH2	PBRM1	0.000565726	2.56562	0.000732339	Co_Occurrence	NOTCH2, PBRM1	22/269
CDKN2A	NRAS	0.000568573	1.92304	0.000735613	Co_Occurrence	CDKN2A, NRAS	45/418
FLT1	NSD1	0.000570967	2.71779	0.000738298	Co_Occurrence	FLT1, NSD1	19/245
HGF	POLE	0.000573232	2.59928	0.000740812	Co_Occurrence	HGF, POLE	20/252
PIK3CG	TP53	0.000582879	1.76178	0.000752858	Co_Occurrence	PIK3CG, TP53	93/986
TP53	KMT2D	0.000583626	1.48081	0.000753402	Co_Occurrence	KMT2D, TP53	190/996
PBRM1	ARID2	0.000587138	2.23837	0.000757513	Co_Occurrence	ARID2, PBRM1	28/315
POLE	SETD2	0.00058827	2.29767	0.00075855	Co_Occurrence	POLE, SETD2	26/304
TP53	NTRK3	0.00058999	1.7831	0.000760344	Co_Occurrence	NTRK3, TP53	89/986
ATR	PBRM1	0.000590892	2.54107	0.000761082	Co_Occurrence	ATR, PBRM1	22/270
ANKRD11	DOT1L	0.000592142	2.89864	0.000762267	Co_Occurrence	ANKRD11, DOT1L	16/215
KMT2D	MET	0.000626397	2.12344	0.000805646	Co_Occurrence	KMT2D, MET	35/426
PIK3C2G	NSD1	0.000626536	2.51734	0.000805646	Co_Occurrence	NSD1, PIK3C2G	22/281
NSD1	FAT1	0.000661982	2.29772	0.000850752	Co_Occurrence	FAT1, NSD1	27/345
ATRX	IKZF1	0.000680242	2.48185	0.000873734	Co_Occurrence	ATRX, IKZF1	22/275
CDKN2A	APC	0.000682498	1.90054	0.000876144	Co_Occurrence	APC, CDKN2A	46/424
GRIN2A	PBRM1	0.000694393	1.99296	0.00089092	Co_Occurrence	GRIN2A, PBRM1	39/401
NOTCH1	PBRM1	0.000713006	2.31373	0.000914292	Co_Occurrence	NOTCH1, PBRM1	25/295
PGR	APC	0.000738253	2.31868	0.000946143	Co_Occurrence	APC, PGR	25/321
BRAF	EPHA3	0.000776546	1.8404	0.000994667	Co_Occurrence	BRAF, EPHA3	49/479
NTRK3	BRAF	0.000793111	1.93697	0.00101532	Co_Occurrence	BRAF, NTRK3	42/459
ATM	NTRK3	0.000806433	2.3765	0.00103181	Co_Occurrence	ATM, NTRK3	24/286
FLT3	BRAF	0.000833624	2.06533	0.00106601	Co_Occurrence	BRAF, FLT3	36/442
ATR	ARID1A	0.00084934	2.16882	0.0010855	Co_Occurrence	ARID1A, ATR	29/355
ANKRD11	APC	0.000860085	2.31855	0.00109863	Co_Occurrence	ANKRD11, APC	26/324
NSD1	EPHB1	0.00087264	2.88694	0.00111405	Co_Occurrence	EPHB1, NSD1	15/209
ATM	TET2	0.000879251	2.33903	0.00112187	Co_Occurrence	ATM, TET2	24/288
ATRX	ATM	0.000910547	2.19202	0.00116116	Co_Occurrence	ATM, ATRX	27/313
POLE	CDKN2A	0.000981806	2.07858	0.00125134	Co_Occurrence	CDKN2A, POLE	31/357
STK11	NRAS	0.000993718	0.267628	0.00126583	Mutually_Exclusive	NRAS, STK11	5/390
ATRX	TP53	0.000998033	1.65084	0.00127062	Co_Occurrence	ATRX, TP53	104/989
SPEN	ATRX	0.00105622	2.22519	0.00134396	Co_Occurrence	ATRX, SPEN	26/306
MET	ARID1A	0.00108107	2.1745	0.00137483	Co_Occurrence	ARID1A, MET	28/352
ALK	TP53	0.00109408	1.64532	0.00138984	Co_Occurrence	ALK, TP53	106/989
KMT2A	TP53	0.00109408	1.64532	0.00138984	Co_Occurrence	KMT2A, TP53	106/989
PDGFRA	DOT1L	0.00112314	2.75797	0.00142597	Co_Occurrence	DOT1L, PDGFRA	17/227
BRAF	CDKN2A	0.00112613	1.68706	0.00142899	Co_Occurrence	BRAF, CDKN2A	63/524
PBRM1	NOTCH3	0.00113557	2.15145	0.00144018	Co_Occurrence	NOTCH3, PBRM1	28/321
ARID1B	MDC1	0.00117973	2.47889	0.00149537	Co_Occurrence	ARID1B, MDC1	19/251
CDKN2A	KRAS	0.00122302	0.475984	0.00154938	Mutually_Exclusive	CDKN2A, KRAS	20/547
EPHA7	NSD1	0.00134584	2.47168	0.00170404	Co_Occurrence	EPHA7, NSD1	20/267
EPHB1	ARID1B	0.00135402	2.64617	0.00171346	Co_Occurrence	ARID1B, EPHB1	17/232
ATM	EPHA3	0.00144259	2.17768	0.00182454	Co_Occurrence	ATM, EPHA3	27/314
CARD11	TP53	0.00145853	1.6912	0.0018437	Co_Occurrence	CARD11, TP53	92/989
EPHB1	SETD2	0.00146798	2.33666	0.00185463	Co_Occurrence	EPHB1, SETD2	21/281
PBRM1	ANKRD11	0.00150042	2.42038	0.00189457	Co_Occurrence	ANKRD11, PBRM1	20/266
ALK	NSD1	0.00154739	2.41017	0.00195282	Co_Occurrence	ALK, NSD1	20/271
KEAP1	RBM10	0.00157082	2.58306	0.00198131	Co_Occurrence	KEAP1, RBM10	17/236
PREX2	PBRM1	0.00158794	2.13037	0.0020018	Co_Occurrence	PBRM1, PREX2	27/317
FLT3	EP300	0.00166054	2.5601	0.00209219	Co_Occurrence	EP300, FLT3	17/235
NTRK3	NRAS	0.00169775	2.05828	0.0021379	Co_Occurrence	NRAS, NTRK3	29/343
TET2	CDKN2A	0.0017016	2.00952	0.00214159	Co_Occurrence	CDKN2A, TET2	31/361
TERT	NSD1	0.00171402	2.77731	0.00215605	Co_Occurrence	NSD1, TERT	14/206
PBRM1	PTPRT	0.00175778	1.79406	0.0022099	Co_Occurrence	PBRM1, PTPRT	46/476
EPHB1	ARID2	0.00177599	2.35991	0.00223157	Co_Occurrence	ARID2, EPHB1	20/271
KMT2B	PBRM1	0.0017979	2.29764	0.00225787	Co_Occurrence	KMT2B, PBRM1	22/281
POLE	PBRM1	0.00180377	2.20388	0.00226401	Co_Occurrence	PBRM1, POLE	23/291
MET	PBRM1	0.00182728	2.34914	0.00229228	Co_Occurrence	MET, PBRM1	20/269
RBM10	ERBB4	0.00187168	2.23811	0.00234671	Co_Occurrence	ERBB4, RBM10	24/320
PBRM1	ARID1A	0.00188158	1.91062	0.00235784	Co_Occurrence	ARID1A, PBRM1	36/391
RBM10	STK11	0.0019546	2.50397	0.00244802	Co_Occurrence	RBM10, STK11	17/240
SETD2	BRAF	0.00196641	1.76253	0.00246147	Co_Occurrence	BRAF, SETD2	50/487
GRIN2A	ATRX	0.00199489	1.87949	0.00249577	Co_Occurrence	ATRX, GRIN2A	39/409
SETD2	ARID1A	0.00203264	1.87267	0.00254162	Co_Occurrence	ARID1A, SETD2	39/404
PAK7	KRAS	0.00207566	0.476006	0.00259401	Mutually_Exclusive	KRAS, PAK7	18/526
EPHA7	KRAS	0.00210158	0.432734	0.00262499	Mutually_Exclusive	EPHA7, KRAS	13/487
EPHA3	DOT1L	0.00211467	2.30617	0.00263992	Co_Occurrence	DOT1L, EPHA3	20/274
PBRM1	NF1	0.00214021	1.82916	0.00267036	Co_Occurrence	NF1, PBRM1	42/442
PTPRT	KRAS	0.00215111	0.572075	0.00268251	Mutually_Exclusive	KRAS, PTPRT	35/639
FLT1	NRAS	0.00221082	2.00517	0.00275547	Co_Occurrence	FLT1, NRAS	30/350
PIK3CG	BRAF	0.00231756	1.80302	0.00288696	Co_Occurrence	BRAF, PIK3CG	42/467
FLT1	PBRM1	0.00234326	2.14059	0.00291741	Co_Occurrence	FLT1, PBRM1	24/300
DOT1L	ATM	0.00235187	2.36339	0.00292655	Co_Occurrence	ATM, DOT1L	19/262
KMT2C	BRAF	0.00235606	1.6466	0.00293018	Co_Occurrence	BRAF, KMT2C	60/521
MTOR	SETD2	0.00241855	2.31268	0.00300628	Co_Occurrence	MTOR, SETD2	21/282
KMT2B	ATRX	0.00253062	2.17975	0.0031439	Co_Occurrence	ATRX, KMT2B	22/289
MGA	CREBBP	0.00260322	2.17034	0.00323236	Co_Occurrence	CREBBP, MGA	22/286
PTPRS	PGR	0.00280353	2.6463	0.00347921	Co_Occurrence	PGR, PTPRS	15/218
ARID1B	ATM	0.00293189	2.2163	0.00363655	Co_Occurrence	ARID1B, ATM	21/279
RBM10	ATRX	0.00296079	2.28504	0.00367042	Co_Occurrence	ATRX, RBM10	19/270
PGR	NRAS	0.00302392	2.15208	0.00374669	Co_Occurrence	NRAS, PGR	23/317
FLT4	BRAF	0.00303129	1.83376	0.0037538	Co_Occurrence	BRAF, FLT4	39/459
TP63	PBRM1	0.00315905	2.02192	0.00390991	Co_Occurrence	PBRM1, TP63	27/325
ALK	NRAS	0.00322469	1.86556	0.00398903	Co_Occurrence	ALK, NRAS	33/372
BRAF	FLT1	0.00323772	1.78752	0.004003	Co_Occurrence	BRAF, FLT1	42/468
PDGFRA	CDKN2A	0.0033499	2.00167	0.00413949	Co_Occurrence	CDKN2A, PDGFRA	27/348
APC	NSD1	0.00336951	2.1147	0.00416149	Co_Occurrence	APC, NSD1	23/323
HGF	ATRX	0.00344197	2.16289	0.00424871	Co_Occurrence	ATRX, HGF	21/285
STK11	BRAF	0.0035084	0.438107	0.0043284	Mutually_Exclusive	BRAF, STK11	13/516
HGF	KEAP1	0.00352973	2.31855	0.00435239	Co_Occurrence	HGF, KEAP1	18/253
CDKN2A	ARID1A	0.00355615	1.69155	0.00438264	Co_Occurrence	ARID1A, CDKN2A	47/451
NSD1	KMT2C	0.00373238	2.08422	0.00459736	Co_Occurrence	KMT2C, NSD1	23/326
PDGFRA	NSD1	0.00374306	2.49261	0.00460807	Co_Occurrence	NSD1, PDGFRA	15/225
PBRM1	ERBB4	0.00379854	1.88421	0.00467388	Co_Occurrence	ERBB4, PBRM1	32/368
STK11	EPHA3	0.00392054	2.05995	0.00482143	Co_Occurrence	EPHA3, STK11	23/301
ARID1B	CDKN2A	0.00392367	1.98964	0.00482272	Co_Occurrence	ARID1B, CDKN2A	28/352
IL7R	BRAF	0.00397026	1.89895	0.00487738	Co_Occurrence	BRAF, IL7R	33/444
NSD1	PBRM1	0.00409311	2.26606	0.00502297	Co_Occurrence	NSD1, PBRM1	18/263
TERT	PBRM1	0.00409311	2.26606	0.00502297	Co_Occurrence	PBRM1, TERT	18/263
MGA	TP53	0.00410874	1.60771	0.00503947	Co_Occurrence	MGA, TP53	89/993
PBRM1	KDR	0.00417657	2.02478	0.00511739	Co_Occurrence	KDR, PBRM1	26/319
ATRX	SETD2	0.00417669	1.96048	0.00511739	Co_Occurrence	ATRX, SETD2	28/335
DOT1L	POLE	0.00424077	2.39859	0.00519315	Co_Occurrence	DOT1L, POLE	17/244
ERBB4	NRAS	0.00428389	1.74737	0.00524317	Co_Occurrence	ERBB4, NRAS	40/414
NSD1	MGA	0.00432088	2.38339	0.00528564	Co_Occurrence	MGA, NSD1	17/247
IKZF1	NRAS	0.00438285	2.05322	0.00535862	Co_Occurrence	IKZF1, NRAS	24/325
RBM10	MGA	0.00448059	2.35867	0.00547523	Co_Occurrence	MGA, RBM10	17/248
PGR	NOTCH1	0.00453214	2.35154	0.00553529	Co_Occurrence	NOTCH1, PGR	17/248
NSD1	CARD11	0.00455133	2.34914	0.0055558	Co_Occurrence	CARD11, NSD1	17/249
ANKRD11	SETD2	0.00470263	2.14634	0.00573746	Co_Occurrence	ANKRD11, SETD2	20/285
PGR	PBRM1	0.00471655	2.21909	0.00575141	Co_Occurrence	PBRM1, PGR	18/265
PBRM1	HGF	0.00478403	2.13782	0.00583062	Co_Occurrence	HGF, PBRM1	20/279
EPHB1	TP53	0.00481107	1.69602	0.00586049	Co_Occurrence	EPHB1, TP53	68/993
KMT2B	SETD2	0.00540798	2.03476	0.00658253	Co_Occurrence	KMT2B, SETD2	22/300
POLE	IKZF1	0.00540952	2.26348	0.00658253	Co_Occurrence	IKZF1, POLE	17/250
SPEN	NRAS	0.0055666	1.8849	0.00677011	Co_Occurrence	NRAS, SPEN	29/354
EPHB1	BRAF	0.00557368	1.85746	0.00677515	Co_Occurrence	BRAF, EPHB1	32/444
HGF	TP53	0.00581419	1.63112	0.0070638	Co_Occurrence	HGF, TP53	75/994
[truncated: 409 more rows]

## Sheet: Table S5
Table S5 Genes pairs of co-occurrence or mutual exclusion based on nine sex-related prognostic genes across all cancer patients
[truncated: 37 more rows]

[truncated: 2 more sheets: Table S6, Table S7]
